# Supplementary material for: Fear of COVID-19 and illicit drug use during COVID-19 pandemic in Japan: a case-control study
Source: PeerJ. 2024 Sep 26;12:e18137. doi: 10.7717/peerj.18137 (PMC11439375; doi:10.7717/peerj.18137)
Supplement: Supplemental Information 2 — COVID-19, coronavirus disease 2019; ISCED, International Standard Classification of Education; K6, Kessler Psychological Distress Scale. [file peerj-12-18137-s002.xlsx]

## Sheet: Sheet1
Supplemental Table S1. Characteristics of the study participants
		No drug use since baseline (n=16,963)		Illicit drug use since baseline (n=837)		Only cannabis use since baseline (n=104)		Non-cannabis use since baseline (regardless of cannabis use) (n=733)
		n (%)		n (%)		n (%)		n (%)
Sex
	Male	8,381 (49.4)		512 (61.2)		68 (65.4)		444 (60.6)
	Female	8,582 (50.6)		325 (38.8)		36 (34.6)		289 (39.4)
Age
	15–24	1,135 (6.7)		109 (13.0)		7 (6.7)		102 (13.9)
	25–34	1,739 (10.3)		134 (16.0)		10 (9.6)		124 (16.9)
	35–44	2,679 (15.8)		178 (21.3)		18 (17.3)		160 (21.8)
	45–54	3,419 (20.2)		191 (22.8)		24 (23.1)		167 (22.8)
	55–64	3,050 (18.0)		120 (14.3)		25 (24.0)		95 (13.0)
	65+	4,941 (29.1)		105 (12.5)		20 (19.2)		85 (11.6)
Occupational status
	Employed	10,056 (59.3)		598 (71.4)		80 (76.9)		518 (70.7)
	Student	692 (4.1)		65 (7.8)		4 (3.8)		61 (8.3)
	Unemployed	6,215 (36.6)		174 (20.8)		20 (19.2)		154 (21.0)
Number of persons in household
	One	3,198 (18.9)		188 (22.5)		24 (23.1)		164 (22.4)
	Two or more	13,765 (81.1)		649 (77.5)		80 (76.9)		569 (77.6)
Annual household income
	>7 million yen	4,021 (23.7)		244 (29.2)		36 (34.6)		208 (28.4)
	3–7 million yen	6,266 (36.9)		303 (36.2)		39 (37.5)		264 (36.0)
	<3 million yen	3,127 (18.4)		135 (16.1)		13 (12.5)		122 (16.6)
	Do not know/Do not want to answer	3,549 (20.9)		155 (18.5)		16 (15.4)		139 (19.0)
Marital status
	Married	10,662 (62.9)		469 (56.0)		62 (59.6)		407 (55.5)
	Unmarried	6,301 (37.1)		368 (44.0)		42 (40.4)		326 (44.5)
Education
	ISCED≥6	7,801 (46.0)		430 (51.4)		58 (55.8)		372 (50.8)
	ISCED<6	9,125 (53.8)		404 (48.3)		46 (44.2)		358 (48.8)
	Others	37 (0.2)		3 (0.4)		0 (0.0)		3 (0.4)
Drinking status
	Never	3,506 (20.7)		200 (23.9)		11 (10.6)		189 (25.8)
	Rarely	4,902 (28.9)		243 (29.0)		42 (40.4)		201 (27.4)
	Sometimes	4,713 (27.8)		205 (24.5)		24 (23.1)		181 (24.7)
	Almost daily	3,842 (22.6)		189 (22.6)		27 (26.0)		162 (22.1)
Smoking status
	Never	9,414 (55.5)		408 (48.7)		32 (30.8)		376 (51.3)
	Used to smoke but quit	5,253 (31.0)		284 (33.9)		48 (46.2)		236 (32.2)
	Current smoker	2,296 (13.5)		145 (17.3)		24 (23.1)		121 (16.5)
K6
	Negative	14,753 (87.0)		632 (75.5)		85 (81.7)		547 (74.6)
	Positive	2,210 (13.0)		205 (24.5)		19 (18.3)		186 (25.4)
Presence of any psychiatric disorder
	No	16,098 (94.9)		785 (93.8)		97 (93.3)		688 (93.9)
	Yes	865 (5.1)		52 (6.2)		7 (6.7)		45 (6.1)
COVID-19, coronavirus disease 2019; ISCED, International Standard Classification of Education; K6, Kessler Psychological Distress Scale.
