# Supplementary material for: Fear of COVID-19 and illicit drug use during COVID-19 pandemic in Japan: a case-control study
Source: PeerJ. 2024 Sep 26;12:e18137. doi: 10.7717/peerj.18137 (PMC11439375; doi:10.7717/peerj.18137)
Supplement: Supplemental Information 4 [file peerj-12-18137-s004.xlsx]

## Sheet: Sheet1
ID	(2020) number of people who live together and make a living together	(2020) status of job, executive (excluding self-employed) (1) vs self-employed (2) vs assisting in a self-employed business (3) vs regular employee (managerial position) (4) vs regular employee (excluding managerial staff) (5) vs temporary employee (6) vs contract employee (7) vs part-time job (8) vs home-based wage job (in-house job) (9) vs student (including ronin) (10) vs retiree (after retire…	(2020) marital status, spousal (1) vs never married (2) vs bereaved (before March 2020) (3) vs bereaved (on or after April 2020) (4) vs divorced (before March 2020) (5) vs divorced (on or after April 2020) (6)	(2020) last school graduated (dropped out) or currently attending, junior high school (1) vs private high school (2) vs national/public high school (3) vs vocational school (4) vs junior college/technical college (5) vs private university (6) vs national university (7) vs public universities (prefectural, municipal, etc.) (8) vs graduate school (9) vs other (10)	(2020) for the last school you graduated from or are currently attending, the number that applies from the following, graduated (1) vs dropped out (2) vs still in school (including leave of absence) (3)	(2020) please choose the second option from the bottom. A (1) vs B (2) vs C (3) vs D (4) vs E (5)	(2020) you are afraid of COVID-19 seriously, not at all (1) vs not applicable (2) vs neither yes nor no (3) vs applicable (4) vs very applicable (5)	(2020) you feel uncomfortable just thinking of COVID-19, not at all (1) vs not applicable (2) vs neither yes nor no (3) vs applicable (4) vs very applicable (5)	(2020) you sweat just thinking of COVID-19, not at all (1) vs not applicable (2) vs neither yes nor no (3) vs applicable (4) vs very applicable (5)	(2020) you are afraid of death by COVID-19, not at all (1) vs not applicable (2) vs neither yes nor no (3) vs applicable (4) vs very applicable (5)	(2020) you feel nervous and anxious when you see some news about COVID-19 in the Internet, not at all (1) vs not applicable (2) vs neither yes nor no (3) vs applicable (4) vs very applicable (5)	(2020) anxiety about COVID-19 keeps you awake, not at all (1) vs not applicable (2) vs neither yes nor no (3) vs applicable (4) vs very applicable (5)	(2020) you get palpitations just thinking of COVID-19, not at all (1) vs not applicable (2) vs neither yes nor no (3) vs applicable (4) vs very applicable (5)	(2020) you fear losing your life to cigarette smoke, not at all (1) vs not applicable (2) vs neither yes nor no (3) vs applicable (4) vs very applicable (5)	(2020) you fear losing your life to heavy drinking, not at all (1) vs not applicable (2) vs neither yes nor no (3) vs applicable (4) vs very applicable (5)	(2020) you fear losing your life in a car accident, not at all (1) vs not applicable (2) vs neither yes nor no (3) vs applicable (4) vs very applicable (5)	(2020) in the last 30 days, you felt nervous, always (1) vs most of the time (2) sometimes (3) vs a little (4) vs not at all (5)	(2020) in the last 30 days, you felt hopeless, always (1) vs most of the time (2) sometimes (3) vs a little (4) vs not at all (5)	(2020) in the last 30 days, you felt restless or fidgety, always (1) vs most of the time (2) sometimes (3) vs a little (4) vs not at all (5)	(2020) in the last 30 days, you felt so depressed that nothing could cheer you up, always (1) vs most of the time (2) sometimes (3) vs a little (4) vs not at all (5)	(2020) in the last 30 days, you felt that everything was an effort, always (1) vs most of the time (2) sometimes (3) vs a little (4) vs not at all (5)	(2020) in the last 30 days, you felt worthless, always (1) vs most of the time (2) sometimes (3) vs a little (4) vs not at all (5)	(2020) in the last 30 days, you felt you had no social life, always (1) vs most of the time (2) sometimes (3) vs a little (4) vs not at all (5)	(2020) in the last 30 days, you felt left out, always (1) vs most of the time (2) sometimes (3) vs a little (4) vs not at all (5)	(2020) in the last 30 days, you felt isolated from others, always (1) vs most of the time (2) sometimes (3) vs a little (4) vs not at all (5)	(2020) in the last 30 days, you felt more isolated from others compared to before the COVID-19 pandemic (before January 2020), always (1) vs most of the time (2) sometimes (3) vs a little (4) vs not at all (5)	(2020) do you currently drink alcohol (beer, sake, shochu, wine, whiskey, etc.), never (1) vs no (at least once but did not habitually) (2) vs no (used habitually) (3) vs sometimes (4) vs almost every day (5)	(2020) do you currently use hypnotic or antianxiety, never (1) vs no (at least once but did not habitually) (2) vs no (used habitually) (3) vs sometimes (4) vs almost every day (5)	(2020) do you currently use morphine or other narcotic (prescribed by a physician and used for cancer pain), never (1) vs no (at least once but did not habitually) (2) vs no (used habitually) (3) vs sometimes (4) vs almost every day (5)	(2020) do you currently use morphine or other narcotic (prescribed by a physician and used for non-cancer pain), never (1) vs no (at least once but did not habitually) (2) vs no (used habitually) (3) vs sometimes (4) vs almost every day (5)	(2020) do you currently use morphine or other narcotic (obtained in a manner not prescribed by a physician), never (1) vs no (at least once but did not habitually) (2) vs no (used habitually) (3) vs sometimes (4) vs almost every day (5)	(2020) do you currently use inhalation of organic solvent such as thinner or toluene (except for appropriate use in the workplace), never (1) vs no (at least once but did not habitually) (2) vs no (used habitually) (3) vs sometimes (4) vs almost every day (5)	(2020) do you currently use dangerous drug (law-evading herbs, magic mushrooms, etc.), never (1) vs no (at least once but did not habitually) (2) vs no (used habitually) (3) vs sometimes (4) vs almost every day (5)	(2020) do you currently use cannabis (marijuana), never (1) vs no (at least once but did not habitually) (2) vs no (used habitually) (3) vs sometimes (4) vs almost every day (5)	(2020) do you currently use methamphetamine, cocaine, heroin, never (1) vs no (at least once but did not habitually) (2) vs no (used habitually) (3) vs sometimes (4) vs almost every day (5)	(2020) do you currently use ciarettes, never (1) vs no (at least once but did not habitually) (2) vs no (used habitually) (3) vs sometimes (4) vs almost every day (5)	(2020) do you currently use hand-rolled cigarettes (cigarettes that you roll yourself using a kit, etc.), never (1) vs no (at least once but did not habitually) (2) vs no (used habitually) (3) vs sometimes (4) vs almost every day (5)	(2020) do you currently use Ploom Tech, never (1) vs no (at least once but did not habitually) (2) vs no (used habitually) (3) vs sometimes (4) vs almost every day (5)	(2020) do you currently use Ploom Tech +, never (1) vs no (at least once but did not habitually) (2) vs no (used habitually) (3) vs sometimes (4) vs almost every day (5)	(2020) do you currently use Ploom S, never (1) vs no (at least once but did not habitually) (2) vs no (used habitually) (3) vs sometimes (4) vs almost every day (5)	(2020) do you currently use IQOS, never (1) vs no (at least once but did not habitually) (2) vs no (used habitually) (3) vs sometimes (4) vs almost every day (5)	(2020) do you currently use glo, never (1) vs no (at least once but did not habitually) (2) vs no (used habitually) (3) vs sometimes (4) vs almost every day (5)	(2020) do you currently use glo sens, never (1) vs no (at least once but did not habitually) (2) vs no (used habitually) (3) vs sometimes (4) vs almost every day (5)	(2020) do you currently use PULZE, never (1) vs no (at least once but did not habitually) (2) vs no (used habitually) (3) vs sometimes (4) vs almost every day (5)	(2020) do you currently use electronic cigarettes (containing nicotine), never (1) vs no (at least once but did not habitually) (2) vs no (used habitually) (3) vs sometimes (4) vs almost every day (5)	(2020) do you currently use electronic cigarettes (without nicotine), never (1) vs no (at least once but did not habitually) (2) vs no (used habitually) (3) vs sometimes (4) vs almost every day (5)	(2020) do you currently use electronic cigarettes (may or may not contain nicotine), never (1) vs no (at least once but did not habitually) (2) vs no (used habitually) (3) vs sometimes (4) vs almost every day (5)	(2020) do you currently use cigars, never (1) vs no (at least once but did not habitually) (2) vs no (used habitually) (3) vs sometimes (4) vs almost every day (5)	(2020) do you currently use little cigars, never (1) vs no (at least once but did not habitually) (2) vs no (used habitually) (3) vs sometimes (4) vs almost every day (5)
282	1	1	5	4	1	4	2	2	2	2	2	2	2	2	2	2	5	5	5	5	5	5	5	5	5	5	5	1	1	1	1	1	1	1	1	3	1	1	1	1	1	1	1	1	1	1	1	1	1
888	2	13	1	6	1	4	3	3	1	1	1	1	1	1	1	1	5	5	5	5	5	5	5	5	5	5	5	1	1	1	1	1	1	1	1	3	1	1	1	1	1	1	1	1	1	1	1	2	1
1619	4	12	1	3	1	4	1	1	1	1	1	1	1	1	1	1	5	5	5	5	5	5	5	5	5	5	1	1	1	1	1	1	1	1	1	1	1	1	1	1	1	1	1	1	1	1	1	1	1
2884	2	13	1	4	2	4	5	5	3	5	2	1	1	1	1	2	5	5	5	5	5	5	5	5	5	5	5	3	1	1	1	1	1	1	1	3	1	1	1	1	1	1	1	1	1	1	1	1	1
7900	1	5	2	8	1	4	3	3	3	3	3	3	3	3	3	3	3	3	3	3	3	3	3	3	3	3	4	5	1	1	1	1	1	1	1	1	1	1	1	1	1	1	1	1	1	1	1	1	1
10006	2	13	2	1	1	4	3	2	1	2	1	1	1	2	1	2	5	5	5	5	5	5	5	5	5	5	1	1	1	1	1	1	1	1	1	1	1	1	1	1	1	1	1	1	1	1	1	1	1
12894	1	11	2	6	1	4	5	4	1	5	3	2	1	4	4	4	5	5	5	4	5	5	5	5	5	5	4	1	1	1	1	1	1	1	1	1	1	1	1	1	1	1	1	1	1	1	1	1	1
13164	1	13	3	3	1	4	3	1	1	1	1	1	1	1	1	1	5	5	5	5	5	5	5	5	5	5	2	3	1	1	1	1	1	1	1	3	1	1	1	1	1	1	1	1	1	1	1	1	1
15582	1	5	5	3	1	4	3	3	3	3	3	3	3	3	3	3	5	5	5	5	5	5	5	5	5	5	4	1	1	1	1	1	1	1	1	1	1	1	1	1	1	1	1	1	1	1	1	1	1
15922	2	8	1	3	1	4	3	3	2	3	2	1	1	1	1	3	5	5	5	5	5	5	5	5	5	5	2	1	1	1	1	1	1	1	1	1	1	1	1	1	1	1	1	1	1	1	1	1	1
16199	3	5	1	6	1	4	4	3	3	4	3	1	1	4	4	5	2	4	4	3	3	3	3	5	5	5	5	5	1	1	1	1	1	1	1	3	1	1	1	1	1	1	1	1	5	2	1	1	1
17696	2	12	1	5	1	4	5	3	1	3	3	1	1	1	1	1	5	5	5	4	4	5	5	5	5	5	1	1	1	1	1	1	1	1	1	1	1	1	1	1	1	1	1	1	1	1	1	1	1
18486	3	8	1	3	1	4	5	4	2	5	4	2	1	1	1	1	5	5	5	5	5	5	5	5	5	5	5	1	1	1	1	1	1	1	1	5	1	3	1	3	1	1	1	1	1	4	1	2	1
20705	2	12	1	6	1	4	5	5	4	3	3	3	3	3	3	3	3	4	3	2	3	4	3	4	3	3	4	1	1	1	1	1	1	1	1	1	1	1	1	1	1	1	1	1	1	1	1	1	1
20764	2	12	1	3	1	4	5	5	1	5	5	5	1	5	5	5	5	5	5	5	5	5	5	5	5	5	1	1	1	1	1	1	1	1	1	1	1	1	1	1	1	1	1	1	1	1	1	1	1
24192	1	13	3	4	1	4	3	3	1	2	2	1	1	1	1	2	5	5	5	4	5	5	5	5	5	5	4	1	1	1	1	1	1	1	1	1	1	1	1	1	1	1	1	1	1	1	1	1	1
24842	2	12	1	6	1	4	5	5	3	5	5	4	4	1	1	1	3	4	4	1	2	1	2	1	1	2	4	1	1	1	1	1	1	1	1	1	1	1	1	1	1	1	1	1	1	1	1	1	1
25257	1	8	2	6	1	4	5	2	1	5	5	1	2	2	1	2	4	5	4	4	4	5	5	4	5	4	4	1	1	1	1	1	1	1	1	1	1	1	1	1	1	1	1	1	1	1	1	1	1
25454	3	8	2	2	1	4	3	3	3	3	3	3	3	3	3	3	5	5	4	4	3	4	5	5	5	5	5	3	1	1	1	1	1	1	1	5	2	1	1	1	1	1	1	1	1	1	1	1	1
26197	2	12	1	5	1	4	2	2	2	2	2	2	1	1	1	1	2	2	2	2	2	2	1	1	1	1	1	1	1	1	1	1	1	1	1	3	1	1	1	1	1	1	1	1	1	1	1	1	1
26497	5	12	1	8	1	4	4	2	1	2	2	1	1	1	3	3	3	5	4	3	3	5	5	5	5	5	4	2	1	1	1	1	1	1	1	3	1	1	1	1	1	1	1	1	1	1	1	1	1
26698	1	8	2	1	1	4	4	2	1	1	1	1	1	1	1	1	5	5	4	4	4	2	5	5	5	5	1	1	1	1	1	1	1	1	1	3	1	1	1	1	5	1	1	1	1	1	1	1	1
27901	4	5	1	7	1	4	4	4	4	4	4	3	3	4	4	3	5	5	5	5	5	5	5	5	5	5	4	1	1	1	1	1	1	1	1	1	1	1	1	1	1	1	1	1	1	1	1	1	1
27947	4	12	1	7	1	4	3	3	1	3	3	1	1	1	1	3	4	5	4	5	4	5	3	5	5	5	2	1	1	1	1	1	1	1	1	1	1	1	1	1	1	1	1	1	1	1	1	1	1
29737	2	11	1	2	1	4	4	4	1	2	3	1	1	1	1	2	5	5	5	5	5	5	5	5	5	5	5	1	1	1	1	1	1	1	1	5	1	2	1	1	1	1	1	1	1	1	1	2	1
29890	2	12	1	3	1	4	4	5	2	3	4	1	1	1	1	3	5	5	5	5	5	5	5	5	5	5	4	1	1	1	1	1	1	1	1	1	1	1	1	1	1	1	1	1	1	1	1	1	1
29907	1	2	2	7	1	4	3	3	1	3	3	1	3	1	3	3	5	5	5	5	5	5	5	5	5	5	5	1	1	1	1	1	1	1	1	1	1	1	1	1	1	1	1	1	1	1	1	1	1
32997	2	4	1	4	1	4	4	3	1	4	3	1	2	4	4	2	5	5	5	5	5	5	5	4	5	3	5	1	1	1	1	1	1	1	1	3	1	1	1	1	1	1	1	1	1	1	1	1	1
35083	1	5	5	7	1	4	5	2	1	3	1	1	1	1	1	1	5	5	5	5	5	5	5	5	5	5	2	1	1	1	1	1	1	1	1	3	1	1	1	1	1	1	1	1	1	1	1	1	1
35215	3	1	2	6	1	4	5	5	3	4	3	3	3	3	3	3	5	5	5	5	5	5	5	5	5	5	2	1	1	1	1	1	1	1	1	1	1	1	1	1	1	1	1	1	1	1	1	1	1
35729	4	4	1	6	1	4	4	4	3	3	4	2	2	3	3	4	4	5	5	5	5	5	3	5	5	4	2	1	1	1	1	1	1	1	1	1	1	1	1	1	1	1	1	1	1	1	1	1	1
36119	4	4	1	6	1	4	4	1	1	1	2	1	2	2	2	2	5	5	5	5	5	5	5	5	5	5	5	1	1	1	1	1	1	2	1	3	1	1	1	1	1	1	1	1	1	1	1	1	1
36190	2	5	1	6	1	4	5	5	3	3	5	3	3	5	4	4	3	3	5	5	5	5	5	5	5	3	5	1	1	1	1	1	1	1	1	3	1	1	1	1	1	1	1	1	1	1	1	1	1
36540	2	12	1	5	1	4	4	3	1	3	3	1	1	3	1	2	4	5	5	4	5	5	5	5	5	5	1	1	1	1	1	1	1	1	1	1	1	1	1	1	1	1	1	1	1	1	1	1	1
37220	2	12	1	3	1	4	5	5	2	4	5	3	2	4	1	4	3	3	3	3	4	3	4	3	4	4	4	4	1	2	1	1	1	1	1	2	1	1	1	1	1	1	1	1	1	1	1	1	1
38173	2	7	1	3	1	4	4	4	1	2	2	1	2	1	1	2	4	5	5	5	5	5	5	5	5	5	4	1	1	1	1	1	1	1	1	3	1	1	1	1	1	1	1	1	1	1	1	1	1
38470	1	5	2	8	1	4	5	5	1	5	5	5	5	5	5	5	4	4	4	4	4	4	4	4	4	4	2	1	1	1	1	1	1	1	1	1	1	1	1	1	1	1	1	1	1	1	1	1	1
38514	2	12	1	5	1	4	4	4	2	4	4	1	4	2	2	3	5	5	5	5	5	5	4	5	4	4	2	1	1	1	1	1	1	1	1	1	1	1	1	1	1	1	1	1	1	1	1	1	1
39025	1	5	2	7	1	4	1	1	1	1	1	1	1	1	1	1	5	5	5	5	5	5	5	5	5	5	1	1	1	1	1	1	1	1	1	1	1	1	1	1	1	1	1	1	1	1	1	1	1
39208	2	11	1	6	1	4	3	3	2	2	2	1	1	2	2	4	5	5	5	5	4	4	4	4	4	5	5	1	1	1	1	1	1	1	1	3	1	1	1	1	1	1	1	1	1	1	1	2	1
39622	2	8	1	3	1	4	4	4	1	3	3	1	1	3	3	3	5	4	5	4	4	4	4	4	4	4	5	1	1	1	1	1	1	1	1	4	1	1	1	1	1	1	1	1	1	1	1	1	1
40992	2	13	1	3	1	4	4	4	1	3	3	1	1	1	1	1	5	5	5	5	5	5	5	5	5	5	4	1	1	1	1	1	1	1	1	5	2	2	2	2	2	2	2	2	2	2	2	2	2
41435	4	8	1	6	1	4	2	2	2	2	2	2	2	2	2	4	5	5	5	5	5	5	5	5	5	5	2	2	1	1	1	1	1	1	1	1	1	1	1	1	1	1	1	1	1	1	1	1	1
41930	3	5	2	6	1	4	2	4	1	1	1	1	1	3	1	3	5	5	5	5	4	5	3	5	5	5	2	1	1	1	1	1	1	1	1	1	1	1	1	1	1	1	1	1	1	1	1	1	1
42528	2	5	1	7	1	4	4	3	2	3	3	2	3	1	2	2	4	4	4	3	4	5	5	5	5	5	4	1	1	1	1	1	1	1	1	1	1	1	1	1	1	1	1	1	1	1	1	1	1
43262	4	12	1	4	1	4	1	5	1	1	1	1	1	1	1	1	5	5	5	5	5	5	5	5	5	5	1	1	1	1	1	1	1	1	1	5	1	1	1	1	1	1	1	1	1	1	1	1	1
44077	1	12	3	3	1	4	3	3	3	3	3	2	2	1	1	1	5	5	5	5	5	5	5	5	5	5	4	1	1	1	1	1	1	1	1	1	1	1	1	1	1	1	1	1	1	1	1	1	1
46839	1	13	3	3	1	4	4	4	2	3	2	2	2	1	1	1	5	5	4	4	5	5	2	5	3	5	1	1	1	1	1	1	1	1	1	1	1	1	1	1	1	1	1	1	1	1	1	1	1
50224	2	8	1	5	1	4	5	5	1	5	1	1	1	1	1	1	5	5	5	5	4	5	1	5	5	5	4	1	1	1	1	1	1	1	1	1	1	1	1	1	1	1	1	1	1	1	1	1	1
50764	1	2	3	9	1	4	1	1	1	1	1	1	1	1	1	1	5	5	5	5	5	5	5	5	5	5	4	1	1	1	1	1	1	1	1	1	1	1	1	1	1	1	1	1	1	1	1	1	1
51751	2	12	1	3	1	4	3	3	1	2	3	1	1	1	1	1	5	5	5	5	5	5	5	5	5	5	5	2	1	1	1	1	1	1	1	3	1	1	1	1	1	1	1	1	1	1	1	1	1
53762	1	7	1	7	1	4	2	4	1	1	2	1	1	1	1	3	5	5	5	5	4	5	5	5	5	5	5	1	1	1	1	1	1	1	1	5	1	1	1	1	1	1	1	1	1	1	2	2	1
54080	1	7	5	6	1	4	4	4	1	3	3	1	1	2	2	4	4	5	5	5	3	5	4	5	5	5	5	1	1	1	1	1	1	1	1	3	1	1	1	1	1	1	1	1	1	1	1	2	1
54081	2	8	1	8	1	4	4	5	1	2	2	2	2	2	2	2	4	5	5	5	5	5	4	5	5	4	4	5	1	1	1	1	1	1	1	1	1	1	1	1	1	1	1	1	1	1	1	1	1
54217	3	5	2	6	1	4	4	2	1	3	3	1	1	2	1	4	5	5	4	5	5	5	5	5	5	5	4	1	1	1	1	1	1	1	1	5	1	1	1	1	1	1	1	1	2	2	1	2	1
55299	3	7	1	9	1	4	4	3	2	3	3	2	2	2	2	2	5	5	5	5	5	5	5	5	5	5	5	2	1	1	1	1	1	1	1	3	1	1	1	1	1	1	1	1	1	1	1	1	1
55948	3	11	1	5	1	4	2	2	1	2	2	1	1	1	1	1	5	5	5	5	5	5	5	5	5	5	3	1	1	1	1	1	1	1	1	3	1	1	1	1	1	1	1	1	1	1	1	2	1
56396	3	7	5	6	1	4	4	3	1	4	2	1	1	4	2	4	4	5	4	4	4	4	4	4	4	5	4	1	1	1	1	1	1	1	1	3	1	1	1	1	1	1	1	1	1	1	1	1	1
56660	2	8	1	3	1	4	4	4	2	4	4	2	1	2	2	2	4	5	4	4	4	3	3	3	4	5	2	1	1	1	1	1	1	1	1	1	1	1	1	1	1	1	1	1	1	1	1	1	1
58732	5	4	1	5	1	4	4	3	1	2	2	1	1	3	1	1	5	5	5	5	5	5	5	5	5	5	5	1	1	1	1	1	1	1	1	5	1	2	5	2	2	2	1	1	1	1	1	1	1
59307	3	5	1	3	1	4	4	4	2	4	3	2	2	2	2	4	5	5	5	5	5	5	5	5	5	5	2	1	1	1	1	1	1	1	1	3	1	1	1	1	1	1	1	1	1	1	1	1	1
59917	2	8	1	3	1	4	4	4	4	5	4	4	3	4	3	4	5	5	5	5	5	5	5	5	5	5	5	1	1	1	1	1	1	1	1	1	1	1	1	1	1	1	1	1	1	1	1	1	1
60638	56	4	1	7	1	4	4	3	2	2	4	1	1	1	2	2	2	4	3	2	3	1	1	2	2	2	2	2	1	1	1	1	1	1	1	1	1	1	1	1	1	1	1	1	1	1	1	1	1
60644	2	1	1	5	2	4	4	3	3	3	3	3	3	3	1	4	5	5	5	5	5	5	5	5	5	5	2	2	1	1	1	1	1	1	1	3	1	1	1	1	1	1	1	1	1	1	1	1	1
62077	2	5	2	3	1	4	5	4	1	5	1	1	1	1	1	1	4	5	5	5	5	5	5	5	5	5	2	1	1	1	1	1	1	1	1	1	1	1	1	1	1	1	1	1	1	1	1	1	1
62640	2	12	1	5	1	4	5	3	1	4	3	2	1	3	2	2	4	5	5	5	5	5	4	5	5	5	2	3	1	1	1	1	1	1	1	1	1	1	1	1	1	1	1	1	1	1	1	1	1
64193	3	5	1	3	1	4	5	2	1	5	3	1	1	1	1	1	5	5	5	5	5	5	5	5	5	5	5	1	1	1	1	1	1	1	1	5	1	1	1	1	1	1	1	1	1	1	1	1	1
64234	1	5	2	6	1	4	4	4	1	4	4	1	3	2	2	3	2	5	3	4	3	4	2	4	3	3	4	1	1	1	1	1	1	1	1	3	1	1	1	1	1	1	1	1	1	1	1	1	1
64558	2	12	1	5	1	4	5	4	2	3	3	2	2	3	3	3	5	5	4	4	5	5	4	4	4	4	1	1	1	1	1	1	1	1	1	1	1	1	1	1	1	1	1	1	1	1	1	1	1
65309	1	13	5	2	1	4	5	5	3	5	3	3	3	3	3	4	5	5	5	5	5	5	4	5	5	5	1	1	1	1	1	1	1	1	1	1	1	1	1	1	1	1	1	1	1	1	1	1	1
65614	1	13	2	3	1	4	1	1	1	1	1	1	1	1	1	1	5	5	5	5	5	5	5	5	5	5	5	5	5	5	5	5	5	5	5	1	1	1	1	1	1	1	1	1	1	1	1	1	1
65714	3	5	1	9	1	4	4	3	2	4	3	3	3	3	3	3	4	4	4	4	4	4	4	4	4	4	1	1	1	1	1	1	1	1	1	2	1	1	1	1	1	1	1	1	1	1	1	1	1
68195	2	1	2	2	1	4	3	3	3	3	3	3	3	3	3	3	5	5	5	5	5	5	5	5	5	5	4	1	1	1	1	1	1	1	1	1	1	1	1	1	1	1	1	1	1	1	1	1	1
69314	3	4	1	6	1	4	4	4	2	4	4	2	3	3	3	4	3	5	4	5	5	5	5	5	5	5	2	1	1	1	1	1	1	1	1	3	1	1	1	1	1	1	1	1	3	1	1	1	1
70316	3	12	1	4	1	4	4	4	2	2	2	1	1	1	3	4	4	5	5	5	5	5	5	5	5	5	5	1	1	1	1	1	1	1	1	1	1	1	1	1	1	1	1	1	1	1	1	1	1
71092	3	7	1	3	1	4	4	3	3	3	3	3	3	3	3	3	3	3	3	3	3	3	3	3	3	3	5	1	1	1	1	1	1	1	1	1	1	1	1	1	1	1	1	1	1	1	1	1	1
73163	2	12	1	5	1	4	5	5	3	5	4	3	3	2	2	4	5	5	5	5	5	5	5	5	5	5	1	1	1	1	1	1	1	1	1	1	1	1	1	1	1	1	1	1	1	1	1	1	1
73448	3	5	1	9	1	4	2	2	1	1	2	2	1	1	1	1	5	5	5	5	5	5	5	5	5	5	4	5	1	1	1	1	1	1	1	1	1	1	1	1	1	1	1	1	1	1	1	1	1
73786	4	12	1	2	1	4	3	3	1	1	2	1	1	1	1	2	5	5	5	5	5	5	5	5	5	5	5	4	1	1	1	1	1	1	1	3	1	1	1	1	1	1	1	1	1	1	1	1	1
74388	1	13	5	5	1	4	5	4	3	4	4	4	3	1	1	4	4	5	4	4	4	4	4	4	4	4	4	1	1	1	1	1	1	1	1	1	1	1	1	1	1	1	1	1	1	1	1	1	1
77663	2	12	1	2	1	4	4	3	2	3	2	1	1	1	1	2	5	5	5	5	5	5	5	5	5	5	1	1	1	1	1	1	1	1	1	1	1	1	1	1	1	1	1	1	1	1	1	1	1
78147	1	13	3	2	1	4	4	4	1	3	3	2	2	1	1	4	3	4	3	3	4	4	4	5	5	5	5	4	1	1	1	1	1	1	1	5	1	2	1	2	2	2	1	1	1	2	1	2	1
79102	1	4	2	6	1	4	4	4	1	3	3	2	1	1	1	5	4	5	5	5	5	5	5	5	5	5	3	1	1	1	1	1	1	1	1	5	1	1	1	1	1	1	1	1	1	1	1	1	1
81285	3	1	1	3	1	4	2	2	2	2	1	1	1	3	3	3	5	5	5	5	5	5	5	5	5	5	5	1	1	1	1	1	1	1	1	3	1	1	1	1	1	1	1	1	1	1	1	1	1
82318	4	4	1	9	1	4	4	3	1	4	1	1	1	5	5	5	5	4	5	5	4	4	2	1	1	5	2	1	1	1	1	2	1	1	1	1	1	1	1	1	1	1	1	1	1	1	1	1	1
82324	1	13	6	3	1	4	2	2	2	2	2	2	2	2	2	2	4	4	4	4	4	4	4	4	4	4	1	1	1	1	1	1	1	1	1	1	1	1	1	1	1	1	1	1	1	1	1	1	1
82581	2	7	1	5	1	4	4	4	1	4	3	1	1	1	1	4	5	5	5	5	5	5	5	5	5	5	4	1	1	1	1	1	1	1	1	3	2	1	1	1	1	1	1	1	1	1	1	2	1
83331	3	5	1	6	1	4	1	1	1	1	1	1	1	1	1	1	5	5	5	5	5	5	5	5	5	5	5	1	1	1	1	1	1	1	1	1	1	1	1	1	1	1	1	1	1	1	1	1	1
83557	2	5	1	6	1	4	4	3	3	3	3	4	3	3	3	2	2	3	3	3	2	2	2	2	2	2	5	1	1	1	1	1	1	1	1	1	1	1	1	1	1	1	1	1	1	1	1	1	1
84284	2	6	2	2	1	4	4	3	4	3	3	1	1	1	1	3	5	5	5	5	5	5	3	5	5	5	4	1	1	1	1	1	1	1	1	3	1	2	2	1	2	5	1	2	1	1	1	1	1
85289	2	5	2	4	2	4	5	4	2	5	4	1	3	3	3	4	5	5	5	5	5	5	5	5	5	5	1	1	1	1	1	1	1	1	1	3	1	1	1	1	1	1	1	1	1	1	1	1	1
85298	3	5	2	3	1	4	3	3	3	3	3	3	3	3	3	3	5	5	5	5	5	5	5	5	5	5	1	1	1	1	1	1	1	1	1	1	1	1	1	1	1	1	1	1	1	1	1	1	1
85554	1	2	5	6	1	4	3	3	3	3	3	3	3	3	3	3	5	5	5	5	5	5	5	5	5	5	5	1	1	1	1	1	1	1	1	1	1	1	1	1	1	1	1	1	1	1	1	1	1
85588	3	1	1	6	1	4	4	3	2	2	3	2	2	2	2	2	4	4	4	5	4	5	4	4	4	4	4	2	1	1	1	1	1	1	1	3	1	1	1	1	1	1	1	1	1	1	1	2	1
85640	3	4	2	6	1	4	3	3	3	3	3	3	3	3	3	3	5	5	5	5	5	5	3	5	3	5	2	2	1	1	1	1	1	1	1	1	1	1	1	1	1	1	1	1	1	1	1	1	1
85947	2	12	1	6	1	4	4	4	1	4	3	1	1	3	3	4	4	5	5	5	3	5	5	5	5	5	2	1	1	1	1	1	1	1	1	1	1	1	1	1	1	1	1	1	1	1	1	1	1
87172	2	2	1	3	1	4	5	4	3	4	2	2	2	1	1	2	5	5	5	5	5	5	5	5	5	5	5	1	1	1	1	1	1	1	1	3	1	3	1	1	3	3	1	1	1	3	1	2	1
87807	2	5	1	3	1	4	2	2	1	2	2	1	1	2	2	3	3	3	4	3	3	1	3	3	5	5	4	1	1	1	1	1	1	1	1	1	1	1	1	1	1	1	1	1	1	1	1	1	1
88634	2	12	1	6	1	4	3	1	1	3	1	1	1	1	1	2	5	5	5	5	5	5	5	5	5	5	4	1	1	1	1	1	1	1	1	1	1	1	1	1	1	1	1	1	1	1	1	1	1
89365	4	12	1	5	2	4	4	5	2	5	4	2	2	2	2	2	5	5	5	5	5	5	4	5	5	5	2	1	1	1	1	1	1	1	1	1	1	1	1	1	1	1	1	1	1	1	1	1	1
90584	2	8	1	7	1	4	2	2	1	1	1	1	1	1	1	4	4	5	4	5	2	5	5	5	5	5	5	3	1	1	1	1	1	1	1	3	1	1	1	1	1	1	1	1	1	1	1	2	1
90636	2	2	1	6	1	4	4	5	2	3	2	2	2	1	1	3	4	4	3	3	4	4	4	4	4	4	1	2	1	1	1	1	1	1	1	3	1	1	1	1	1	1	1	1	1	1	1	1	1
91454	2	5	1	7	1	4	4	5	4	4	4	3	3	1	1	2	4	5	4	5	5	5	5	5	5	4	4	5	5	5	5	5	5	5	5	5	1	1	1	1	1	1	1	1	1	1	1	2	1
91530	1	2	5	4	1	4	2	1	1	2	1	1	1	1	1	1	5	5	5	5	5	5	1	5	5	5	4	1	1	1	1	1	1	1	1	5	1	1	1	1	1	5	1	1	1	5	1	2	5
91834	2	12	1	6	1	4	4	4	3	4	3	2	2	2	2	2	5	5	5	5	5	4	3	5	5	5	4	1	1	1	1	1	1	1	1	5	1	1	1	1	1	1	1	1	1	1	1	1	1
92156	2	5	5	3	1	4	3	2	1	1	1	1	1	3	1	1	5	5	5	5	5	4	4	5	5	5	2	1	1	1	1	1	1	1	1	3	1	1	1	1	1	1	1	1	1	1	1	1	1
92876	1	13	2	6	1	4	5	3	1	1	1	1	1	1	1	1	5	4	5	5	5	5	5	5	5	5	5	1	1	1	1	1	1	1	1	3	1	1	1	1	1	1	1	1	1	1	1	1	1
94481	1	5	5	3	1	4	2	2	3	2	2	3	2	2	2	2	5	5	5	5	5	5	5	5	4	5	1	1	1	1	1	1	1	1	1	1	1	1	1	1	1	1	1	1	1	1	1	1	1
95730	2	12	1	7	1	4	4	4	3	4	3	1	1	1	1	2	5	5	5	5	5	5	5	5	5	5	4	5	1	1	1	1	1	1	1	1	1	1	1	1	1	1	1	1	1	1	1	1	1
96819	3	1	1	9	1	4	2	5	1	1	1	1	1	1	1	3	5	4	5	3	3	5	5	5	5	5	5	1	1	1	1	1	1	1	1	1	1	1	1	1	1	1	1	1	1	1	1	1	1
99160	2	5	2	6	1	4	4	4	2	2	2	2	2	2	2	2	5	5	5	5	5	5	5	5	5	5	2	1	1	1	1	1	1	1	1	2	1	1	1	1	1	1	1	1	1	1	1	1	1
101892	1	7	5	5	1	4	4	4	4	4	4	4	4	4	4	4	5	5	5	5	5	5	5	5	5	5	2	1	1	1	1	1	1	1	1	1	1	1	1	1	1	1	1	1	1	1	1	1	1
102646	1	5	2	9	1	4	4	5	1	2	3	1	1	1	2	2	2	3	4	4	4	3	3	3	3	4	5	1	1	1	1	1	1	1	1	2	1	1	1	1	1	1	1	1	1	1	1	1	1
103360	1	4	2	6	1	4	2	1	1	1	1	1	1	1	1	2	5	5	5	5	5	3	1	5	4	5	2	2	1	1	1	1	1	1	1	1	1	1	1	1	1	1	1	1	1	1	1	1	1
104851	4	8	1	3	1	4	4	4	3	3	3	3	3	1	1	1	5	5	5	5	5	5	5	5	5	5	2	1	1	1	1	1	1	1	1	1	1	1	1	1	1	1	1	1	1	1	1	1	1
105236	1	7	5	2	1	4	4	4	3	4	2	2	2	1	1	3	1	5	5	1	2	5	5	2	2	5	4	1	1	1	1	1	1	1	1	3	1	1	1	1	1	1	1	1	1	1	1	1	1
105374	4	2	1	6	1	4	5	3	2	5	2	1	1	1	1	2	3	5	5	5	3	5	5	5	5	5	1	1	1	1	1	1	1	1	1	1	1	1	1	1	1	1	1	1	1	1	1	1	1
105380	4	8	1	3	1	4	5	4	2	5	5	2	1	5	5	5	5	5	4	5	3	5	4	5	5	5	2	1	1	1	1	1	1	1	1	2	1	1	1	1	1	1	1	1	1	1	1	1	1
105725	2	4	1	9	1	4	4	2	1	4	3	1	1	1	1	4	3	1	1	1	2	1	2	1	1	1	4	2	1	1	1	1	1	1	1	1	1	1	1	1	1	1	1	1	1	1	1	1	1
106406	2	13	2	6	1	4	5	4	3	4	3	3	3	4	3	3	3	3	5	3	5	5	5	5	5	5	1	1	1	1	1	1	1	1	1	1	1	1	1	1	1	1	1	1	1	1	1	1	1
107085	1	4	2	6	1	4	4	4	2	2	4	1	1	2	2	2	5	5	5	5	5	5	5	5	5	5	1	1	1	1	1	1	1	1	1	1	1	1	1	1	1	1	1	1	1	1	1	1	1
107175	2	13	1	7	1	4	4	3	2	4	3	2	2	2	2	2	5	5	5	4	5	5	5	5	4	4	5	1	1	1	1	1	1	1	1	3	1	1	1	1	1	1	1	1	1	1	1	2	1
107724	3	4	1	6	1	4	3	2	1	2	2	2	2	2	2	2	5	5	5	5	5	5	5	5	5	5	5	1	1	1	1	1	1	1	1	1	1	1	1	1	1	1	1	1	1	1	1	1	1
107985	2	12	1	5	1	4	5	4	3	4	4	3	4	4	4	3	4	3	4	4	3	4	4	3	3	4	1	1	1	1	1	1	1	1	1	1	1	1	1	1	1	1	1	1	1	1	1	1	1
108221	4	5	1	10	1	4	4	4	1	2	2	1	1	1	1	1	5	5	5	5	5	5	5	5	5	5	4	4	1	1	1	1	1	1	1	3	1	1	1	1	1	1	1	1	1	2	1	1	1
108658	3	13	3	6	1	4	1	1	1	1	1	1	1	1	1	1	5	5	5	5	5	5	5	5	5	5	5	1	1	1	1	1	1	1	1	1	1	1	1	1	1	1	1	1	1	1	1	1	1
109912	1	13	5	3	1	4	4	3	1	1	1	1	1	1	1	1	5	5	5	4	4	5	5	5	5	5	2	5	1	1	1	1	1	1	1	3	1	1	1	1	1	1	1	1	1	1	1	1	1
110445	2	5	1	4	1	4	5	3	1	4	2	1	1	4	1	1	5	5	4	5	4	5	4	4	5	5	5	1	1	1	1	1	1	1	1	5	1	1	1	1	1	1	1	1	1	1	1	1	1
111257	1	5	2	6	1	4	3	1	1	1	1	1	1	1	1	1	5	5	5	5	5	5	5	5	5	5	1	1	1	1	1	1	1	1	1	1	1	1	1	1	1	1	1	1	1	1	1	3	1
111740	2	1	1	6	1	4	3	2	1	1	1	1	1	1	1	1	5	5	5	5	5	5	5	5	5	5	4	1	1	1	1	1	1	1	1	1	1	1	1	1	1	1	1	1	1	1	1	1	1
113788	4	5	1	9	1	4	2	2	2	2	2	2	2	1	1	1	5	5	5	5	5	5	5	5	5	5	4	1	1	1	1	1	1	1	1	1	1	1	1	1	1	1	1	1	1	1	1	1	1
113999	2	5	2	6	1	4	4	2	1	1	1	1	1	1	1	1	5	5	5	5	5	4	5	4	5	5	5	1	1	1	1	1	1	1	1	3	1	1	1	1	5	1	1	1	1	4	1	1	1
114706	1	8	5	4	1	4	4	3	1	3	3	1	1	1	1	2	4	5	3	4	4	5	3	5	5	5	4	1	1	1	1	1	1	1	1	1	1	1	1	1	1	1	1	1	1	1	1	1	1
115259	3	8	1	5	1	4	5	4	3	5	2	1	1	3	4	4	5	5	4	5	5	5	5	5	5	5	3	2	1	1	1	1	1	1	1	3	1	1	1	1	1	1	1	1	1	1	1	1	1
115512	3	8	1	5	1	4	3	3	1	2	2	1	1	1	1	3	4	5	5	5	5	5	5	5	5	5	4	1	1	1	1	1	1	1	1	1	1	1	1	1	1	1	1	1	1	1	1	1	1
115551	3	12	1	7	1	4	4	4	2	3	3	2	2	1	1	1	5	5	5	4	4	5	5	5	5	5	4	1	1	1	1	1	1	1	1	1	1	1	1	1	1	1	1	1	1	1	1	1	1
115896	2	1	1	9	1	4	3	1	1	1	1	1	1	1	1	2	5	5	5	5	5	5	5	5	5	5	5	1	1	1	1	1	1	1	1	3	1	1	1	1	1	1	1	1	1	1	1	2	1
116091	2	13	1	3	1	4	1	1	1	1	1	1	1	1	1	1	5	5	5	5	5	5	5	5	5	5	2	1	1	1	1	1	1	1	1	3	1	1	1	1	1	1	1	1	1	1	1	2	1
120428	2	8	1	9	1	4	4	5	3	3	3	3	3	1	1	1	5	5	5	5	5	5	5	5	5	5	5	1	1	1	1	1	1	1	1	4	1	1	1	1	1	1	1	1	1	1	1	1	1
123565	4	5	1	6	1	4	3	3	2	2	2	2	2	2	2	2	5	5	5	5	5	5	5	5	5	5	4	1	1	1	1	1	1	1	1	1	1	1	1	1	1	1	1	1	1	1	1	1	1
125028	1	2	2	6	1	4	3	4	1	3	4	2	2	4	3	3	4	4	5	4	4	5	3	4	4	4	2	1	1	1	1	1	1	1	1	1	1	1	1	1	1	1	1	1	1	1	1	1	1
125467	2	2	1	3	1	4	5	3	1	3	2	1	1	1	1	1	5	5	5	5	5	5	1	5	5	5	5	1	1	1	1	1	1	1	1	3	1	1	1	1	1	1	1	1	1	1	1	2	1
125525	2	7	1	6	1	4	4	3	3	4	3	2	2	1	1	2	5	5	5	5	5	5	5	5	5	5	1	1	1	1	1	1	1	1	1	3	1	1	1	1	1	1	1	1	1	1	1	1	1
126137	1	7	5	6	1	4	2	4	1	1	3	1	1	2	4	2	3	4	3	2	2	2	1	3	2	2	5	1	1	1	1	1	1	1	1	4	1	1	1	1	1	1	1	1	1	1	1	1	1
127481	1	12	4	6	1	4	3	2	2	4	3	2	2	1	1	3	5	5	4	4	4	5	3	5	5	5	2	1	1	1	1	1	1	1	1	3	1	1	1	1	1	1	1	1	1	1	1	1	1
128696	2	1	1	8	1	4	2	4	1	2	3	1	1	1	1	2	5	5	5	5	5	5	5	5	5	5	4	1	1	1	1	1	1	1	1	5	1	1	1	1	1	5	1	1	1	1	1	2	1
129126	2	12	1	7	1	4	4	4	2	4	3	3	2	4	2	2	4	4	4	4	4	4	4	5	5	5	3	1	1	1	1	1	1	1	1	1	1	1	1	1	1	1	1	1	1	1	1	1	1
129651	1	8	2	4	1	4	3	3	3	3	3	3	3	3	3	3	5	5	5	5	5	5	5	5	5	5	1	1	1	1	1	1	1	1	1	1	1	1	1	1	1	1	1	1	1	1	1	1	1
130480	2	12	1	3	1	4	4	4	2	3	2	2	2	1	1	3	4	5	5	5	5	5	4	5	5	5	4	1	1	1	1	1	1	1	1	3	1	1	1	1	1	1	1	1	1	1	1	1	1
131351	2	12	1	4	1	4	3	3	2	2	2	1	1	3	3	3	4	5	5	5	4	5	5	5	5	5	4	1	1	1	1	1	1	1	1	1	1	1	1	1	1	1	1	1	1	1	1	1	1
132207	2	11	1	5	1	4	4	2	2	2	1	1	1	1	2	1	4	5	4	5	5	5	5	5	5	5	5	1	1	1	1	1	1	1	1	1	1	1	1	1	1	1	1	1	1	1	1	1	1
133239	2	3	1	4	1	4	4	4	2	3	4	2	2	3	3	3	4	5	5	5	5	5	4	5	5	4	2	1	1	1	1	1	1	1	1	1	1	1	1	1	1	1	1	1	1	1	1	1	1
133624	3	12	1	7	1	4	2	2	1	1	1	1	1	1	1	1	4	5	5	4	4	5	2	5	2	3	2	1	1	1	1	1	1	1	1	1	1	1	1	1	1	1	1	1	1	1	1	1	1
134111	3	12	1	3	1	4	5	5	3	5	5	3	3	2	2	5	3	5	3	3	3	5	4	5	5	5	4	1	1	1	1	1	1	1	1	3	1	1	1	1	1	1	1	1	1	1	1	1	1
134361	2	1	1	6	1	4	3	4	1	2	3	1	1	2	1	2	4	5	4	4	4	4	4	5	5	5	5	1	1	1	1	1	1	1	1	2	1	1	1	1	1	1	1	1	1	1	1	1	1
134855	2	12	2	5	1	4	4	4	1	3	3	1	1	1	1	1	4	5	5	5	5	5	2	5	3	3	1	1	1	1	1	1	1	1	1	1	1	1	1	1	1	1	1	1	1	1	1	1	1
136381	1	13	2	2	1	4	4	4	3	3	3	3	3	3	3	3	5	5	5	5	4	5	4	5	5	5	1	1	1	1	1	1	1	1	1	3	1	1	1	1	1	1	1	1	1	1	1	1	1
136435	1	4	2	6	1	4	4	4	4	4	4	3	3	4	4	4	1	1	1	1	1	1	1	1	1	1	5	4	1	1	1	1	1	1	1	5	1	5	1	1	5	5	1	1	1	1	1	2	1
137640	4	4	1	8	1	4	4	4	2	3	3	2	3	2	2	3	5	5	5	5	5	5	5	5	5	5	4	1	1	1	1	1	1	1	1	3	3	3	4	5	3	5	3	1	1	1	1	1	1
139030	2	13	1	2	1	4	5	4	2	5	4	3	3	2	2	5	3	4	5	4	3	5	3	4	4	4	4	1	1	1	1	1	1	1	1	1	1	1	1	1	1	1	1	1	1	1	1	1	1
142131	2	5	1	3	1	4	2	4	1	2	3	1	1	1	1	1	5	5	4	5	5	5	5	5	5	5	4	1	1	1	1	1	1	1	1	1	1	1	1	1	1	1	1	1	1	1	1	1	1
142170	2	13	2	3	1	4	4	4	1	3	3	1	1	1	1	2	4	5	5	5	3	3	2	3	3	5	2	2	1	1	1	1	1	1	1	1	1	1	1	1	1	1	1	1	1	1	1	1	1
142815	1	12	3	3	1	4	2	4	2	2	2	1	2	2	2	2	5	5	5	4	4	5	4	5	5	5	5	1	1	1	1	1	1	1	1	1	1	1	1	1	1	1	1	1	1	1	1	1	1
143097	4	5	5	6	1	4	4	4	2	3	3	2	2	2	2	4	3	3	3	3	3	3	3	3	3	3	5	4	1	1	1	1	1	1	1	1	1	1	1	1	1	1	1	1	1	1	1	1	1
143477	1	4	2	3	1	4	4	4	4	4	4	1	1	1	1	1	4	5	5	3	3	5	5	5	5	5	4	1	1	1	1	1	1	1	1	5	1	1	3	1	1	1	1	1	1	3	3	1	1
145522	1	5	2	9	1	4	3	2	1	1	1	1	1	4	1	2	3	5	5	5	5	5	5	5	5	5	1	1	1	1	1	1	1	1	1	1	1	1	1	1	1	1	1	1	1	1	1	1	1
145564	2	5	2	4	1	4	4	1	1	3	1	1	1	1	1	1	5	5	5	5	5	5	5	5	5	5	5	1	1	1	1	1	1	1	1	3	1	1	1	1	5	1	1	1	1	1	1	1	1
145959	4	9	1	2	1	4	4	4	1	4	1	1	1	3	3	3	5	5	5	5	5	5	5	5	5	5	5	1	1	1	1	1	1	1	1	5	1	4	1	1	1	1	1	1	1	1	1	1	1
145970	3	5	1	6	1	4	3	3	1	2	2	1	1	1	1	1	5	5	5	5	5	5	5	5	5	5	5	1	1	1	1	1	1	1	1	5	1	4	1	1	1	1	1	1	1	1	1	1	1
146758	1	5	2	3	1	4	2	2	1	1	1	1	1	1	1	1	5	5	5	5	5	5	5	5	5	3	3	3	3	3	3	3	3	3	3	3	1	1	1	1	1	1	5	1	1	1	4	1	1
147492	2	12	1	7	1	4	3	4	2	3	3	1	1	3	3	3	4	5	5	5	5	5	5	5	5	5	4	2	1	1	1	1	1	1	1	1	1	1	1	1	1	1	1	1	1	1	1	1	1
149491	4	7	2	9	1	4	4	3	1	2	3	1	1	2	4	2	3	4	3	3	3	4	5	4	4	4	5	5	1	1	1	1	1	1	1	1	1	1	1	1	1	1	1	1	1	1	1	1	1
150935	3	8	1	7	1	4	5	4	4	4	4	4	3	1	1	3	3	5	4	4	4	5	4	5	4	5	5	5	5	5	5	5	5	5	5	1	1	1	1	1	1	1	1	1	1	1	1	1	1
151823	1	13	2	7	1	4	3	3	1	1	1	1	1	1	1	1	5	5	5	5	5	5	4	5	4	5	4	1	1	1	1	1	1	1	1	3	1	1	1	1	1	1	1	1	1	1	1	1	1
152265	3	12	1	6	1	4	5	5	2	3	3	3	2	1	1	1	4	4	4	4	4	5	5	5	5	5	1	1	1	1	1	1	1	1	1	1	1	1	1	1	1	1	1	1	1	1	1	1	1
152563	2	4	1	6	1	4	4	3	1	1	1	1	1	1	1	3	5	5	5	5	5	5	5	5	5	5	1	1	1	1	1	1	1	1	1	1	1	1	1	1	1	1	1	1	1	1	1	1	1
153890	3	8	2	3	1	4	5	5	1	5	5	1	1	5	5	5	5	5	5	5	5	5	5	5	5	5	2	1	1	1	1	1	1	1	1	3	1	1	1	1	1	1	1	1	1	2	1	1	1
154991	4	6	1	6	1	4	4	2	1	1	4	1	2	2	2	2	5	5	5	4	5	5	4	5	5	5	2	1	1	1	1	1	1	1	1	1	1	1	1	1	1	1	1	1	1	1	1	1	1
155998	3	5	2	3	1	4	3	2	1	4	1	1	1	2	1	2	5	5	5	5	5	5	5	5	5	5	1	1	1	1	1	1	1	1	1	1	1	1	1	1	1	1	1	1	1	1	1	1	1
156558	6	8	1	6	1	4	3	4	1	1	1	1	1	1	1	4	3	4	4	5	4	4	4	4	4	5	2	3	1	1	1	1	1	1	1	1	1	1	1	1	1	1	1	1	1	1	1	1	1
156999	2	12	1	3	1	4	4	4	1	3	3	1	1	2	2	3	5	5	5	5	5	5	5	5	5	5	3	1	1	1	1	1	1	1	1	1	1	1	1	1	1	1	1	1	1	1	1	1	1
157635	4	5	1	6	1	4	3	3	3	3	3	3	3	3	3	3	5	5	5	5	5	5	5	5	5	5	4	1	1	1	1	1	1	1	1	3	1	1	1	1	1	1	1	1	1	1	1	1	1
157650	3	2	2	3	1	4	4	2	1	2	2	1	1	1	1	1	5	5	5	5	5	5	5	5	5	5	5	1	1	1	1	1	1	1	1	1	1	1	1	1	1	1	1	1	1	1	1	1	1
159077	2	1	2	9	1	4	4	4	1	3	4	1	1	1	1	4	3	4	4	4	3	5	2	3	3	5	4	1	1	1	1	1	1	1	1	3	1	1	1	1	1	1	1	1	1	1	1	2	1
159332	3	4	1	3	1	4	3	3	2	3	2	2	2	1	1	1	5	4	4	4	4	4	4	4	4	4	4	1	1	1	1	1	1	1	1	1	1	1	1	1	1	1	1	1	1	1	1	1	1
159408	5	5	1	8	1	4	4	4	3	3	4	3	3	3	3	3	5	5	5	5	5	5	5	5	5	5	5	1	1	1	1	1	1	1	1	3	1	1	1	1	1	1	1	1	1	1	1	1	1
159761	3	5	2	6	1	4	4	3	3	3	3	1	1	1	1	2	5	4	5	5	5	5	5	5	5	5	2	2	1	1	1	1	1	1	1	1	1	1	1	1	1	1	1	1	1	1	1	1	1
161314	2	12	1	5	1	4	4	5	1	2	2	1	1	1	1	2	5	5	5	5	5	5	5	5	5	5	4	1	1	1	1	1	1	1	1	1	1	1	1	1	1	1	1	1	1	1	1	1	1
162664	2	1	1	9	1	4	3	1	1	3	1	1	1	4	4	4	5	5	5	5	5	5	5	5	5	5	3	1	1	1	1	1	1	1	1	3	3	3	1	1	1	1	1	1	1	1	1	2	2
163167	2	11	1	7	1	4	5	3	1	4	4	1	1	1	1	1	5	5	5	5	5	5	5	5	5	5	5	1	1	1	1	1	1	1	1	3	1	1	1	1	1	1	1	1	1	1	1	1	1
163868	2	5	1	7	1	4	2	1	1	5	1	1	1	5	5	5	5	5	5	5	5	5	5	5	5	5	2	1	1	1	1	1	1	1	1	1	1	1	1	1	1	1	1	1	1	1	1	1	1
163897	2	8	1	3	1	4	4	4	3	4	4	3	2	1	1	2	5	5	5	5	5	5	5	5	5	5	5	1	1	1	1	1	1	1	1	5	1	1	1	1	1	5	1	1	1	1	1	1	1
165392	1	2	5	6	1	4	5	5	4	2	3	2	2	1	5	4	2	2	2	2	4	3	4	4	4	5	4	1	1	1	1	1	1	1	1	1	1	1	1	1	1	1	1	1	1	1	1	1	1
166319	2	12	1	3	1	4	4	4	3	4	4	2	2	4	4	5	5	5	5	5	3	2	1	3	3	2	4	1	1	1	1	1	1	1	1	1	1	1	1	1	1	1	1	1	1	1	1	1	1
166456	6	5	1	3	1	4	5	1	1	5	1	1	1	1	1	1	5	5	5	5	5	5	5	5	5	5	4	2	1	1	1	1	1	1	1	3	1	1	1	1	1	1	1	1	1	1	1	1	1
168064	2	13	1	6	1	4	2	2	2	2	2	2	2	2	2	2	5	5	5	5	5	5	5	5	5	5	2	1	1	1	1	1	1	1	1	5	1	5	1	1	1	1	1	1	1	1	1	1	1
168803	2	11	1	9	1	4	4	4	3	3	3	3	3	3	2	2	3	4	4	4	3	4	4	4	5	3	4	1	1	1	1	1	1	1	1	3	1	1	1	1	1	1	1	1	1	1	1	1	1
169355	2	12	1	3	1	4	5	5	5	5	5	5	5	4	4	4	5	5	5	5	5	5	5	5	5	5	5	1	1	1	1	1	1	1	1	1	1	1	1	1	1	1	1	1	1	1	1	1	1
169461	3	4	2	7	1	4	4	4	2	2	2	1	1	1	1	1	5	5	5	5	5	5	3	5	5	5	5	1	1	1	1	1	1	1	1	2	1	1	1	1	1	1	1	1	1	1	1	1	1
169792	3	2	2	6	1	4	4	2	2	2	3	2	2	2	2	2	5	5	5	5	5	5	5	5	5	5	2	1	1	1	1	1	1	1	1	2	1	1	1	1	5	1	1	1	2	2	1	1	1
169840	4	5	1	6	1	4	3	2	2	2	2	1	2	2	2	2	5	5	5	5	5	5	2	5	5	5	5	1	1	1	1	1	1	1	1	5	1	1	1	1	1	1	1	1	1	1	1	1	1
169904	4	5	1	6	1	4	4	3	3	3	3	2	2	2	2	3	5	5	5	5	5	5	5	5	5	5	2	1	1	1	1	1	1	1	1	1	1	1	1	1	1	1	1	1	1	1	1	1	1
169969	1	13	3	5	1	4	4	4	1	3	3	1	1	1	1	3	5	5	5	5	5	5	4	5	5	5	1	5	1	1	1	1	1	1	1	1	1	1	1	1	1	1	1	1	1	1	1	1	1
170080	2	12	1	7	1	4	5	5	1	4	2	1	1	1	1	2	4	5	5	5	4	5	2	3	3	2	4	5	1	1	1	1	1	1	1	1	1	1	1	1	1	1	1	1	1	1	1	1	1
170529	2	11	5	3	1	4	5	3	3	4	3	3	3	1	1	1	4	4	4	4	4	5	5	5	5	4	3	1	1	1	1	1	1	1	1	1	1	1	1	1	1	1	1	1	1	1	1	1	1
170612	1	2	2	6	1	4	1	1	1	1	1	1	1	1	1	2	5	5	5	5	5	5	5	5	5	5	4	1	1	1	1	1	1	1	1	1	1	1	1	1	1	1	1	1	1	1	1	1	1
170859	1	5	2	3	1	4	2	1	1	2	1	1	1	1	1	2	5	5	5	5	5	5	5	5	5	5	1	1	1	1	1	1	1	1	1	1	1	1	1	1	1	1	1	1	1	1	1	1	1
170992	4	12	1	2	1	4	5	4	3	4	4	3	2	1	1	1	3	3	4	3	4	2	1	1	1	2	1	4	1	1	1	1	1	1	1	1	1	1	1	1	1	1	1	1	1	1	1	1	1
171935	3	13	2	4	1	4	4	4	1	2	2	2	2	2	2	2	4	4	4	4	4	3	3	3	3	4	3	3	1	1	1	1	1	1	1	1	1	1	1	1	1	1	1	1	1	1	1	1	1
172434	2	5	1	6	1	4	4	2	2	2	3	2	2	2	2	2	4	4	4	4	4	4	5	4	4	4	5	1	1	1	1	1	1	1	1	3	1	1	1	3	3	1	1	1	1	1	1	1	1
174425	3	7	1	3	1	4	4	4	2	3	3	3	2	2	2	3	3	4	4	3	4	5	4	4	4	4	4	1	1	1	1	1	1	1	1	3	1	1	1	1	1	3	1	1	1	1	1	1	1
174837	2	12	1	3	1	4	5	4	1	5	1	1	1	1	1	1	5	5	5	5	5	5	5	5	5	5	5	1	1	1	1	1	1	1	1	1	1	1	1	1	1	1	1	1	1	1	1	1	1
175312	3	12	1	5	1	4	4	4	2	3	3	2	2	3	1	3	4	4	4	5	5	5	5	5	5	3	2	1	1	1	1	1	1	1	1	1	1	1	1	1	1	1	1	1	1	1	1	1	1
176196	3	5	1	6	2	4	2	1	1	1	1	1	1	1	2	4	5	5	4	5	3	5	1	5	5	5	5	1	1	1	1	1	1	1	1	2	1	1	1	1	1	1	1	1	1	1	1	1	1
176873	1	11	2	5	1	4	2	2	1	2	1	1	1	1	1	1	5	5	5	5	5	5	5	5	5	5	5	4	5	5	5	5	5	5	5	1	1	1	1	1	1	1	1	1	1	1	1	1	1
177056	2	8	1	9	1	4	3	3	2	3	3	2	2	3	2	3	4	4	4	4	4	4	5	4	4	4	2	1	1	1	1	1	1	1	1	1	1	1	1	1	1	1	1	1	1	1	1	1	1
177875	3	5	2	4	1	4	3	3	1	3	1	1	1	5	3	3	5	3	5	3	3	3	3	3	3	3	4	1	1	1	1	1	1	1	1	1	1	1	1	1	1	1	1	1	1	1	1	1	1
178937	3	12	1	7	1	4	4	4	2	4	4	2	2	4	3	4	3	5	5	4	4	4	3	3	3	3	2	1	1	1	1	1	1	1	1	1	1	1	1	1	1	1	1	1	1	1	1	1	1
179455	1	2	2	6	1	4	3	3	3	3	4	2	2	3	3	3	5	5	5	5	5	5	5	5	5	5	5	1	1	1	1	1	1	1	1	5	1	1	1	1	1	1	1	1	1	1	1	1	1
180463	1	7	2	9	1	4	3	1	1	1	1	1	1	1	1	2	5	5	5	5	5	5	5	5	5	5	4	2	1	1	1	1	1	1	1	1	1	1	1	1	1	1	1	1	1	1	1	1	1
180703	5	12	3	5	1	4	4	4	3	3	3	3	3	3	3	3	5	5	5	5	5	5	5	5	5	5	2	1	1	1	1	1	1	1	1	1	1	1	1	1	1	1	1	1	1	1	1	1	1
181329	2	6	1	6	1	4	5	1	1	4	2	1	1	4	1	5	5	5	3	4	5	5	2	5	4	5	4	1	1	1	1	1	1	1	1	2	1	1	1	1	1	1	1	1	1	1	1	1	1
182834	2	3	5	6	1	4	4	4	2	3	4	3	4	2	2	5	3	3	3	3	2	2	1	2	2	2	4	5	1	1	1	1	1	1	1	4	1	1	1	1	1	4	1	1	1	1	1	1	1
183700	3	8	2	5	1	4	5	5	5	5	5	5	5	3	3	5	1	1	1	1	4	2	1	1	1	1	1	4	1	1	1	1	1	1	1	1	1	1	1	1	1	1	1	1	1	1	1	1	1
184195	2	13	1	3	1	4	4	3	3	3	3	3	3	3	3	3	5	5	5	5	5	5	5	5	5	5	5	1	1	1	1	1	1	1	1	3	1	1	1	1	1	1	1	1	1	1	1	2	1
184770	4	4	1	6	1	4	1	2	3	1	2	3	1	2	3	4	1	2	3	4	1	2	3	4	1	2	1	2	3	1	2	1	2	3	3	1	2	1	2	3	1	2	3	1	1	1	2	3	3
186565	3	4	1	7	1	4	3	2	2	2	2	1	2	1	1	1	5	5	3	4	4	4	5	5	5	5	5	1	1	1	1	1	1	1	1	3	1	1	1	1	1	1	1	1	1	1	1	1	1
188298	3	13	2	4	1	4	3	2	1	1	1	1	1	1	1	1	5	5	4	4	5	1	1	1	1	5	1	1	1	1	1	1	1	1	1	1	1	1	1	1	1	1	1	1	1	1	1	1	1
188426	5	13	3	3	1	4	5	5	2	4	2	2	1	1	1	1	5	5	5	5	5	5	5	5	5	5	3	1	1	1	1	1	1	1	1	3	1	1	1	1	1	1	1	1	1	1	1	1	1
189968	1	2	3	9	1	4	5	5	1	5	4	1	1	1	1	2	5	4	5	4	4	5	3	3	3	4	2	1	1	1	1	1	1	1	1	1	1	1	1	1	1	1	1	1	1	1	1	1	1
190324	4	7	1	5	1	4	3	2	1	1	1	1	1	1	1	1	5	5	5	5	5	5	5	5	5	5	2	1	1	1	1	1	1	1	1	1	1	1	1	1	1	1	1	1	1	1	1	1	1
191024	2	4	5	3	1	4	5	4	1	4	1	1	1	3	3	3	5	5	5	5	5	5	5	5	5	5	4	1	1	1	1	1	1	1	1	1	1	1	1	1	1	1	1	1	1	1	1	1	1
191897	2	5	2	2	1	4	5	5	3	5	5	1	1	5	1	3	5	5	5	5	5	5	5	5	5	5	2	1	1	1	1	1	1	1	1	5	1	2	2	1	1	1	1	1	1	1	1	1	1
192167	3	8	1	5	2	4	5	5	4	3	5	3	4	1	1	1	2	4	3	2	3	3	3	4	4	5	4	5	1	1	1	1	1	1	1	3	1	1	1	1	1	1	1	1	1	1	1	2	1
192311	2	4	1	4	1	4	4	4	2	4	3	3	3	3	3	3	3	3	3	3	3	3	3	3	3	3	5	1	1	1	1	1	1	1	1	5	1	1	1	1	1	1	1	1	1	1	1	1	1
193377	1	7	2	6	1	4	5	5	1	5	5	1	1	1	1	5	5	5	5	5	5	5	1	5	1	5	5	1	1	1	1	1	1	1	1	3	1	1	1	1	1	1	1	1	1	1	1	1	1
195188	2	8	1	4	1	4	3	4	2	3	3	3	2	2	2	2	5	5	5	5	5	5	5	5	5	5	1	1	1	1	1	1	1	1	1	1	1	1	1	1	1	1	1	1	1	1	1	1	1
196694	2	2	1	7	1	4	4	4	1	4	3	1	1	1	1	1	5	5	5	5	5	5	5	5	5	5	2	1	1	1	1	1	1	1	1	3	1	3	3	3	5	1	1	1	1	1	1	1	1
198601	3	12	1	4	1	4	5	4	2	4	4	1	1	1	1	1	5	5	5	5	5	5	5	5	5	5	5	1	1	1	1	1	1	1	1	1	1	1	1	1	1	1	1	1	1	1	1	1	1
200001	3	7	2	2	1	4	2	3	1	1	1	1	1	1	1	2	5	5	5	5	5	5	5	5	5	5	1	1	1	1	1	1	1	1	1	1	1	1	1	1	1	1	1	1	1	1	1	1	1
200313	2	11	1	3	1	4	5	4	3	4	4	3	5	3	3	4	5	4	5	5	5	5	5	5	5	5	4	1	1	1	1	1	1	1	1	1	1	1	1	1	1	1	1	1	1	1	1	1	1
201816	3	12	1	3	1	4	5	5	2	4	4	2	1	1	1	3	4	5	5	3	4	4	5	5	5	5	4	1	1	1	1	1	1	1	1	1	1	1	1	1	1	1	1	1	1	1	1	1	1
202186	1	5	2	7	1	4	4	3	1	4	3	1	1	1	1	3	3	4	4	4	5	3	2	3	2	3	2	1	1	1	1	1	1	1	1	1	1	1	1	1	1	1	1	1	1	1	1	1	1
202592	2	12	1	5	1	4	3	3	3	3	3	3	3	3	3	3	5	5	5	5	5	5	5	5	5	5	3	3	3	3	3	3	3	3	3	1	1	1	1	1	1	1	1	1	1	1	1	1	1
202925	1	13	2	3	1	4	3	5	3	3	5	3	3	3	3	3	5	5	5	5	5	5	5	5	5	5	5	1	1	1	1	1	1	1	1	5	1	1	1	1	1	1	1	1	1	1	1	1	1
202995	3	13	2	3	1	4	3	3	3	3	3	3	3	3	3	3	5	5	5	5	5	5	5	5	5	5	2	1	1	1	1	1	1	1	1	1	1	1	1	1	1	1	1	1	1	1	1	1	1
203013	2	12	1	6	1	4	4	5	1	5	4	1	1	1	1	1	5	5	5	4	5	5	5	5	5	4	1	1	1	1	1	1	1	1	1	1	1	1	1	1	1	1	1	1	1	1	1	1	1
203490	3	8	1	3	1	4	3	4	2	3	4	2	3	3	2	3	5	5	5	5	5	5	5	4	4	5	1	5	1	1	1	1	1	1	1	3	1	1	1	1	1	1	1	1	1	1	1	1	1
203592	1	11	3	7	1	4	4	4	3	3	3	2	2	2	1	3	4	5	5	5	5	5	5	5	5	5	2	1	1	1	1	1	1	1	1	3	1	1	1	1	1	1	1	1	1	1	1	2	1
203702	2	11	1	9	1	4	3	3	2	4	2	1	1	1	1	2	5	5	5	5	5	5	5	5	5	5	5	1	1	1	1	1	1	1	1	3	1	1	1	1	1	1	1	1	1	1	1	1	1
204086	2	12	1	5	1	4	5	3	1	4	3	3	3	4	4	4	5	5	5	5	5	5	5	5	5	5	4	1	1	1	1	1	1	1	1	1	1	1	1	1	1	1	1	1	1	1	1	1	1
204131	3	5	1	5	1	4	1	1	1	1	1	1	1	1	1	1	5	5	5	5	5	5	5	5	5	5	3	1	1	1	1	1	1	1	1	2	1	1	1	1	1	1	1	1	1	1	1	1	1
204146	2	12	1	2	1	4	4	2	2	2	3	2	2	2	2	3	4	5	5	5	5	5	5	5	5	5	1	2	1	1	1	1	1	1	1	1	1	1	1	1	1	1	1	1	1	1	1	1	1
204554	2	12	1	3	1	4	5	5	1	4	1	1	1	4	4	3	4	5	4	4	4	4	4	4	4	4	5	5	1	1	1	1	1	1	1	3	1	1	1	1	1	5	1	1	1	1	1	1	1
205839	2	12	1	3	1	4	4	4	1	3	2	2	1	1	1	4	4	5	5	5	5	4	4	4	5	4	2	2	1	1	1	1	1	1	1	1	1	1	1	1	1	1	1	1	1	1	1	1	1
206337	2	4	1	6	1	4	5	5	1	5	3	3	3	3	3	3	5	5	5	5	5	4	4	4	4	4	4	1	1	1	1	1	1	1	1	3	1	1	1	1	1	1	1	1	1	1	1	1	1
207587	2	12	1	2	1	4	4	4	2	3	3	1	1	1	1	1	5	5	5	5	5	5	5	5	5	5	2	1	1	1	1	1	1	1	1	1	1	1	1	1	1	1	1	1	1	1	1	1	1
208242	1	5	2	3	1	4	5	5	5	5	5	5	5	5	5	5	5	5	5	5	5	5	5	5	5	5	2	1	1	1	1	1	1	1	1	3	1	1	1	1	1	1	1	1	1	1	1	1	1
208600	1	11	5	5	1	4	4	3	1	1	1	1	1	1	1	1	5	5	5	5	4	5	5	5	5	5	1	1	1	1	1	1	1	1	1	5	1	1	1	1	1	1	1	1	1	1	1	1	1
208952	2	12	1	7	1	4	4	4	2	4	3	3	3	4	4	4	4	3	3	4	4	4	4	4	4	4	4	1	1	1	1	1	1	1	1	1	1	1	1	1	1	1	1	1	1	1	1	1	1
210359	1	12	3	2	1	4	4	5	3	3	3	4	3	3	3	3	5	5	4	4	3	3	3	4	5	5	1	1	1	1	1	1	1	1	1	1	1	1	1	1	1	1	1	1	1	1	1	1	1
210896	1	13	3	3	1	4	3	4	3	3	3	2	2	3	3	3	5	5	5	3	3	5	5	5	5	5	1	1	1	1	1	1	1	1	1	1	1	1	1	1	1	1	1	1	1	1	1	1	1
211242	5	5	1	6	1	4	4	4	1	4	4	1	1	1	1	2	5	4	4	4	4	5	5	5	5	5	2	1	1	1	1	1	1	1	1	1	1	1	1	1	1	1	1	1	1	1	1	1	1
212250	1	8	2	3	1	4	1	1	1	1	1	1	1	1	1	1	5	5	5	5	5	5	3	3	2	5	5	1	1	1	1	1	1	1	1	2	1	1	1	1	1	1	1	1	1	1	1	1	1
212889	3	5	1	5	2	4	4	3	2	4	3	3	3	4	3	4	5	5	5	5	5	5	5	5	5	5	1	1	1	1	1	1	1	1	1	1	1	1	1	1	1	1	1	1	1	1	1	1	1
212936	1	2	3	9	1	4	4	4	1	4	3	1	1	1	1	1	5	5	5	5	5	5	2	4	3	3	2	1	1	1	1	1	1	1	1	5	1	1	1	1	1	1	1	1	1	2	1	1	1
213043	2	4	1	6	1	4	4	3	2	3	3	2	2	3	3	4	5	5	5	5	5	5	5	5	5	5	5	1	1	1	1	1	1	1	1	1	1	1	1	1	1	1	1	1	1	1	1	1	1
213316	4	2	1	6	1	4	4	4	1	4	4	1	1	1	2	2	5	5	5	5	5	5	5	5	5	5	5	1	1	1	1	1	1	1	1	1	1	1	1	1	1	1	1	1	1	1	1	1	1
214372	2	5	3	3	1	4	5	5	2	5	5	3	5	5	5	5	4	3	3	4	3	3	4	4	4	4	4	1	1	1	1	1	1	1	1	1	1	1	1	1	1	1	1	1	1	1	1	1	1
215204	3	12	1	4	1	4	5	5	5	5	5	2	1	1	1	2	2	2	2	1	2	3	4	4	4	5	2	5	1	1	1	1	1	1	1	1	1	1	1	1	1	1	1	1	1	1	1	1	1
215249	3	8	1	6	1	4	4	4	2	2	3	2	2	2	2	3	5	5	4	4	3	5	4	5	5	5	2	1	1	1	1	1	1	1	1	1	1	1	1	1	1	1	1	1	1	1	1	1	1
215277	3	4	2	6	1	4	3	3	3	4	3	3	3	3	3	4	5	5	5	5	5	5	5	5	5	5	4	1	1	1	1	1	1	1	1	3	1	3	1	1	5	1	1	1	1	1	1	1	1
215831	3	12	1	6	1	4	3	3	3	2	2	1	2	2	2	2	4	5	5	5	5	5	4	5	5	5	4	1	1	1	1	1	1	1	1	2	1	1	1	1	1	1	1	1	1	1	1	1	1
215934	3	13	2	4	1	4	3	3	2	3	2	1	1	1	3	3	5	5	5	5	5	3	4	5	5	4	1	1	1	1	1	1	1	1	1	1	1	1	1	1	1	1	1	1	1	1	1	1	1
216385	3	2	1	6	1	4	4	5	2	4	2	2	2	4	2	3	5	5	4	4	4	4	3	4	4	2	2	2	1	1	1	1	1	1	1	5	1	2	1	1	5	2	1	1	1	2	1	2	4
217034	2	13	1	3	1	4	4	3	3	3	3	3	3	3	3	3	5	5	5	5	5	5	5	5	5	5	1	1	1	1	1	1	1	1	1	1	1	1	1	1	1	1	1	1	1	1	1	1	1
217649	2	2	1	4	1	4	3	3	4	4	4	4	4	4	5	3	5	5	5	5	5	5	5	5	5	5	2	1	1	1	1	1	1	1	1	2	1	1	1	1	1	1	1	1	1	1	1	1	1
217781	3	12	1	6	1	4	1	1	1	1	1	1	1	1	1	1	5	1	5	1	5	1	1	5	5	5	2	1	1	1	1	1	1	1	1	2	1	1	1	1	1	1	1	1	1	1	1	1	1
219115	5	13	2	4	1	4	3	3	1	2	2	1	1	2	2	2	4	4	4	3	4	5	2	4	2	5	4	1	1	1	1	1	1	1	1	1	1	1	1	1	1	1	1	1	1	1	1	1	1
219873	3	8	1	5	1	4	5	4	4	4	4	3	3	4	3	3	5	5	5	5	5	5	5	5	5	5	5	1	1	1	1	1	1	1	1	3	1	1	1	1	1	1	1	1	1	1	1	1	1
221136	3	5	1	7	1	4	3	3	2	3	3	2	2	1	1	2	5	5	4	5	5	5	5	5	5	5	2	1	1	1	1	1	1	1	1	5	1	1	1	1	1	2	1	1	1	1	1	1	1
222659	1	13	2	6	1	4	4	4	3	3	4	2	3	3	3	3	4	4	4	3	4	4	4	4	4	4	4	1	1	1	1	1	1	1	1	3	1	1	1	1	1	1	1	1	1	1	1	1	1
222883	3	8	1	3	1	4	3	4	2	4	4	2	1	1	1	2	4	5	4	4	4	4	3	4	4	4	4	4	1	1	1	1	1	1	1	2	1	1	1	1	1	1	1	1	1	1	1	2	1
223358	1	5	2	3	1	4	3	3	1	3	1	1	1	1	1	1	3	3	3	2	3	2	3	2	3	3	5	1	1	1	1	1	1	1	1	5	1	1	1	1	1	1	1	1	1	1	1	1	1
225145	5	11	1	3	1	4	4	4	2	2	3	2	2	3	3	3	5	5	5	5	5	5	5	5	5	5	2	1	1	1	1	1	1	1	1	3	1	1	1	1	1	1	1	1	1	1	1	1	1
225432	3	5	2	6	1	4	5	5	2	4	4	3	3	3	3	4	4	4	4	4	4	4	4	4	4	4	4	1	1	1	1	1	1	1	1	1	1	1	1	1	1	1	1	1	1	1	1	1	1
227861	1	8	2	7	1	4	5	5	3	3	4	3	3	2	2	4	3	3	3	3	3	2	3	4	2	3	5	5	1	1	1	1	1	1	1	1	1	1	1	1	1	1	1	1	1	1	1	1	1
227925	2	8	1	7	1	4	3	4	1	2	4	1	1	5	1	2	5	5	5	3	5	4	5	5	5	5	1	2	1	1	1	1	1	1	1	1	1	1	1	1	1	1	1	1	1	1	1	1	1
228088	1	5	2	7	1	4	3	2	1	2	2	1	1	1	2	2	5	4	4	4	4	5	5	4	4	4	5	1	1	1	1	1	1	1	1	1	1	1	1	1	1	1	1	1	1	1	1	1	1
228551	3	13	3	3	1	4	4	3	2	2	1	1	1	2	2	2	5	5	5	5	5	5	5	5	5	5	5	1	1	1	1	1	1	1	1	5	1	5	1	1	1	1	1	1	1	1	1	1	4
229602	1	5	5	3	1	4	5	5	1	5	5	1	1	5	5	5	5	3	5	5	3	1	1	3	1	1	5	1	1	1	1	1	1	1	1	5	1	1	1	1	1	1	1	1	1	1	1	1	1
229981	1	7	2	4	1	4	2	2	2	2	2	2	2	2	2	2	5	5	5	5	4	5	5	5	5	5	5	1	1	1	1	1	1	1	1	3	1	1	1	1	1	1	1	1	1	1	1	1	1
231512	2	13	3	6	2	4	3	4	2	3	3	2	2	1	1	1	5	5	5	5	5	5	5	5	5	5	5	1	1	1	1	1	1	1	1	1	1	1	1	1	1	1	1	1	1	1	1	1	1
231759	3	12	2	6	1	4	4	3	2	3	1	1	1	1	1	4	5	5	5	5	5	5	5	5	5	5	3	1	1	1	1	1	1	1	1	1	1	1	1	1	1	1	1	1	1	1	1	1	1
232289	2	12	1	3	1	4	4	3	3	3	3	3	3	4	3	3	4	5	5	5	5	5	5	5	5	5	2	1	1	1	1	1	1	1	1	1	1	1	1	1	1	1	1	1	1	1	1	1	1
233502	2	4	1	6	1	4	4	3	2	2	2	2	2	2	2	2	5	5	5	5	5	5	5	5	5	5	5	1	1	1	1	1	1	1	1	5	1	1	1	1	1	1	1	1	1	1	1	2	1
233592	5	13	2	6	2	4	4	2	2	3	3	2	2	4	3	3	2	5	5	5	5	5	5	5	5	5	1	1	1	1	1	1	1	1	1	1	1	1	1	1	1	1	1	1	1	1	1	1	1
233822	1	6	5	6	1	4	1	4	1	1	1	1	1	1	1	4	5	5	5	5	5	5	5	5	5	5	1	1	1	1	1	1	1	1	1	5	1	4	1	5	5	5	1	1	1	1	1	1	1
234524	3	12	1	3	1	4	5	4	1	4	3	1	1	2	1	1	5	5	5	5	5	5	5	5	5	5	2	4	1	1	1	1	1	1	1	1	1	1	1	1	1	1	1	1	1	1	1	1	1
234558	3	11	1	6	1	4	5	5	1	5	3	1	1	1	1	1	5	5	5	5	5	4	4	5	5	5	3	1	1	1	1	1	1	1	1	3	1	1	1	1	1	1	1	1	1	1	1	2	2
234970	3	5	2	5	1	4	5	5	1	5	3	1	1	2	1	2	3	5	5	5	5	5	3	5	5	5	5	1	1	1	1	1	1	1	1	3	1	1	1	1	1	1	1	1	1	1	1	1	1
235193	4	5	1	9	1	4	3	2	4	3	2	3	3	3	3	3	5	5	5	5	5	5	5	5	5	5	1	5	1	1	1	1	1	1	1	1	1	1	1	1	1	1	1	1	1	1	1	1	1
235542	3	4	1	3	1	4	4	3	3	2	2	1	1	1	1	1	5	5	5	5	5	5	5	5	5	5	4	1	1	1	1	1	1	1	1	1	1	1	1	1	1	1	1	1	1	1	1	1	1
235586	4	5	1	7	1	4	5	4	3	4	4	2	2	3	3	3	3	3	4	4	4	4	3	4	4	4	4	5	1	1	1	1	1	1	1	3	1	1	1	1	1	1	1	1	1	1	1	1	1
235680	2	12	1	7	1	4	4	3	1	3	2	1	1	2	1	2	4	5	5	5	5	5	2	5	3	5	4	1	1	1	1	1	1	1	1	1	1	1	1	1	1	1	1	1	1	1	1	1	1
236059	1	11	3	5	1	4	3	3	1	2	2	1	1	1	1	2	5	5	5	5	5	5	5	5	5	5	4	2	1	1	1	1	1	1	1	1	1	1	1	1	1	1	1	1	1	1	1	1	1
236817	3	12	1	6	1	4	4	4	1	4	3	1	1	1	1	1	5	5	5	5	5	5	5	5	5	5	4	1	1	1	1	1	1	1	1	5	1	1	1	1	1	1	1	1	1	1	1	1	1
236926	1	2	2	6	1	4	4	3	1	2	3	2	1	2	1	4	5	5	5	5	5	5	5	5	5	5	1	1	1	1	1	1	1	1	1	1	1	1	1	1	1	1	1	1	1	1	1	1	1
236964	3	12	1	6	1	4	4	4	1	3	3	1	1	5	1	1	5	5	5	4	5	3	4	5	5	5	2	1	1	1	1	1	1	1	1	1	1	1	1	1	1	1	1	1	1	1	1	1	1
237121	2	8	1	4	1	4	4	1	1	1	1	1	1	1	1	1	5	5	5	5	5	5	5	5	5	5	2	1	1	1	1	1	1	1	1	1	1	1	1	1	1	1	1	1	1	1	1	1	1
237615	2	13	2	6	1	4	4	4	2	4	2	2	2	2	2	2	3	3	4	4	4	5	3	4	4	4	1	5	1	1	1	1	1	1	1	1	1	1	1	1	1	1	1	1	1	1	1	1	1
237636	3	5	1	6	2	4	2	2	1	2	1	1	1	2	2	2	5	5	5	5	4	5	5	5	5	5	5	1	1	1	1	1	1	1	1	3	1	1	1	1	1	1	1	1	1	3	1	1	1
238351	3	5	1	6	1	4	2	2	2	2	2	2	2	2	2	2	5	5	5	5	5	5	5	5	5	5	2	1	1	1	1	1	1	1	1	2	1	1	1	1	2	1	1	1	1	1	1	1	1
238408	1	5	2	9	1	4	2	2	2	2	2	2	2	1	1	1	5	5	5	5	5	5	5	5	5	5	5	1	1	1	1	1	1	1	1	5	1	1	1	1	1	1	1	1	1	1	1	1	1
240240	2	6	1	9	1	4	5	5	2	2	3	1	1	1	1	4	5	5	5	5	5	5	5	5	5	5	3	4	1	1	1	1	1	1	1	1	1	1	1	1	1	1	1	1	1	1	1	1	1
240686	2	12	1	9	1	4	3	4	2	3	2	1	1	1	1	4	4	5	5	5	4	5	2	5	4	5	5	2	1	1	1	1	1	1	1	1	1	1	1	1	1	1	1	1	1	1	1	1	1
242037	1	4	2	6	1	4	4	4	1	4	3	2	2	1	1	4	5	5	5	5	5	5	5	5	5	5	4	5	5	5	4	4	4	4	4	1	1	1	1	1	1	1	1	1	1	1	1	1	1
242171	3	12	1	4	1	4	4	4	2	4	4	2	2	3	3	3	4	4	4	4	4	3	3	3	4	4	2	1	1	1	1	1	1	1	1	1	1	1	1	1	1	1	1	1	1	1	1	1	1
243273	2	13	3	5	1	4	3	3	3	3	3	3	3	3	3	3	5	5	5	5	5	5	5	5	5	5	1	1	1	1	1	1	1	1	1	1	1	1	1	1	1	1	1	1	1	1	1	1	1
243936	4	5	2	6	1	4	4	2	1	1	4	1	1	1	1	1	5	5	5	5	5	5	5	5	5	5	4	1	1	1	1	1	1	1	1	3	1	1	1	1	1	1	1	1	1	1	1	1	1
244877	1	13	2	3	1	4	3	3	3	3	3	3	3	3	3	3	5	5	5	5	5	5	5	5	5	5	1	1	1	1	1	1	1	1	1	1	1	1	1	1	1	1	1	1	1	1	1	1	1
246346	2	5	2	3	1	4	5	5	5	5	3	3	3	5	3	4	5	5	4	4	4	4	4	5	4	5	1	5	1	1	1	1	1	1	1	1	1	1	1	1	1	1	1	1	1	1	1	1	1
246745	5	12	1	6	1	4	3	3	2	2	3	2	2	1	1	1	4	5	5	5	4	5	5	5	5	4	1	1	1	1	1	1	1	1	1	3	1	1	1	1	1	1	1	1	1	1	1	1	1
246943	2	8	1	2	1	4	5	4	2	2	3	2	2	1	2	2	5	5	5	4	5	5	5	5	5	5	5	1	1	1	1	1	1	1	1	1	1	1	1	1	1	1	1	1	1	1	1	1	1
247245	3	13	2	4	1	4	4	3	1	3	3	1	1	3	3	3	4	4	4	3	3	3	1	3	3	5	2	5	1	1	1	1	1	1	1	1	1	1	1	1	1	1	1	1	1	1	1	1	1
247824	1	5	5	6	1	4	5	5	5	5	5	4	3	3	5	3	5	5	5	5	5	5	5	5	5	5	4	4	1	1	1	1	1	1	1	1	1	1	1	1	1	1	1	1	1	1	1	1	1
248597	2	8	2	5	1	4	4	4	3	3	4	3	3	2	2	3	3	5	5	5	5	5	5	5	5	5	2	1	1	1	1	1	1	1	1	1	1	1	1	1	1	1	1	1	1	1	1	1	1
249680	2	12	1	6	1	4	3	3	3	3	3	3	3	3	3	3	5	5	5	5	5	5	5	5	5	5	5	1	1	1	1	1	1	1	1	1	1	1	1	1	1	1	1	1	1	1	1	1	1
250582	4	5	1	8	1	4	3	3	1	3	3	3	3	3	3	3	5	5	5	5	5	5	5	5	5	5	2	2	1	1	1	1	1	1	1	5	1	1	1	1	1	1	1	1	1	2	1	1	1
251274	2	5	1	6	1	4	3	4	3	3	2	2	2	3	1	2	5	5	5	5	5	5	5	5	5	5	4	1	1	1	1	1	1	1	1	4	1	1	1	1	1	1	1	1	1	1	1	1	1
251947	1	2	1	6	1	4	4	1	1	4	1	1	1	1	1	2	5	5	5	5	5	5	5	5	5	5	4	1	1	1	1	1	1	1	1	2	1	1	1	1	1	1	1	1	1	1	1	1	1
252218	2	2	1	1	1	4	3	4	1	1	1	1	1	1	1	1	5	5	5	5	5	5	5	4	5	5	2	1	1	1	1	1	1	1	1	3	1	1	1	1	1	1	1	1	1	1	1	1	1
252362	2	12	1	3	1	4	4	5	1	2	5	3	3	1	1	2	3	3	3	3	3	3	2	3	3	3	4	2	1	1	1	1	1	1	1	5	1	2	1	1	1	1	1	1	1	1	2	1	1
252499	2	7	1	7	1	4	4	4	3	3	3	3	3	3	3	3	4	5	4	4	4	5	5	5	5	5	5	1	1	1	1	1	1	1	1	3	1	1	1	1	1	1	1	1	1	1	1	2	2
252643	3	12	1	3	1	4	2	5	1	1	1	1	1	1	1	1	5	5	5	5	5	5	5	5	5	5	2	1	1	1	1	1	1	1	1	2	1	1	1	1	1	1	1	1	1	1	1	1	1
253605	2	8	1	6	1	4	4	4	1	4	3	2	2	1	1	1	3	4	5	4	4	5	4	5	5	5	1	1	1	1	1	1	1	1	1	3	1	1	1	1	1	1	1	1	1	1	1	1	1
253859	3	13	1	6	1	4	3	3	3	3	3	3	3	3	3	3	5	5	5	5	5	5	5	5	5	5	2	1	1	1	1	1	1	1	1	1	1	1	1	1	1	1	1	1	1	1	1	1	1
254150	2	5	1	2	1	4	4	4	2	4	1	1	1	1	1	3	5	5	5	5	5	5	5	5	5	5	5	1	1	1	1	1	1	1	1	5	1	2	1	1	2	2	1	1	1	1	1	2	2
254186	2	8	1	4	1	4	4	3	2	3	3	2	2	2	2	3	4	5	4	4	4	4	3	5	4	4	2	1	1	1	1	1	1	1	1	2	1	1	1	1	1	1	1	1	1	1	1	1	1
254471	3	12	1	3	1	4	5	4	2	5	4	3	2	1	1	3	5	5	5	5	5	5	5	5	5	5	3	1	1	1	1	1	1	1	1	1	1	1	1	1	1	1	1	1	1	1	1	1	1
256629	1	5	2	7	1	4	4	3	3	3	1	1	1	1	1	1	5	5	5	5	4	5	4	5	5	5	2	2	1	1	1	1	1	1	1	1	1	1	1	1	1	1	1	1	1	1	1	1	1
258431	2	11	1	3	1	4	4	5	2	5	3	1	1	5	3	3	5	5	5	5	5	5	5	5	5	5	1	1	1	1	1	1	1	1	1	1	1	1	1	1	1	1	1	1	1	1	1	1	1
258642	2	8	1	7	1	4	3	4	1	1	2	1	1	1	1	2	5	5	5	5	5	5	5	5	5	5	2	1	1	1	1	1	1	1	1	5	1	2	1	1	1	1	1	1	1	1	1	1	1
258978	1	5	2	6	1	4	4	3	1	1	2	2	2	2	2	2	5	4	4	4	4	4	2	3	3	3	4	1	1	1	1	1	1	1	1	1	1	1	1	1	1	1	1	1	1	1	1	1	1
259503	3	13	2	6	1	4	3	3	2	2	2	2	2	1	1	2	5	5	5	5	5	4	4	4	4	5	4	1	1	1	1	1	1	1	1	5	1	1	1	1	1	1	1	1	1	1	1	1	1
259515	2	7	2	9	1	4	3	3	2	3	3	2	2	2	2	3	5	5	5	5	5	5	5	5	5	5	4	1	1	1	1	1	1	1	1	1	1	1	1	1	1	1	1	1	1	1	1	1	1
263041	3	2	1	6	1	4	4	2	1	4	4	2	1	1	1	2	5	5	5	3	5	5	3	5	5	5	4	1	1	1	1	1	1	1	1	1	1	1	1	1	1	1	1	1	1	1	1	1	1
263834	2	12	1	7	1	4	2	3	1	1	1	1	1	1	1	1	5	5	5	5	5	5	2	5	4	5	2	1	1	1	1	1	1	1	1	1	1	1	1	1	1	1	1	1	1	1	1	1	1
263884	2	12	1	5	1	4	4	3	2	2	2	2	2	2	2	2	5	5	5	5	4	5	4	5	5	5	5	1	1	1	1	1	1	1	1	3	1	1	1	1	1	1	1	1	1	3	1	1	1
265352	3	13	2	3	1	4	4	3	3	3	4	3	3	3	3	3	5	5	5	5	5	5	5	5	5	4	5	1	1	1	1	1	1	1	1	1	1	1	1	1	1	1	1	1	1	1	1	1	1
265749	2	2	1	3	1	4	5	1	1	3	1	1	1	1	1	3	5	5	5	5	5	5	1	5	4	5	5	2	1	1	1	1	1	1	1	1	1	1	1	1	1	1	1	1	1	1	1	1	1
266550	2	12	1	3	1	4	5	4	2	3	2	1	1	2	1	1	5	5	5	4	5	5	4	5	5	5	2	1	1	1	1	1	1	1	1	1	1	1	1	1	1	1	1	1	1	1	1	1	1
267870	2	12	1	7	1	4	4	3	1	4	3	1	1	3	3	3	5	5	5	5	5	5	5	5	5	5	1	1	1	1	1	1	1	1	1	1	1	1	1	1	1	1	1	1	1	1	1	1	1
269569	2	3	1	4	1	4	5	5	1	5	3	1	1	1	1	3	4	5	4	4	4	4	4	5	5	5	5	1	1	1	1	1	1	1	1	3	1	1	1	1	1	1	1	1	1	1	1	1	1
270340	3	12	1	6	1	4	5	5	1	3	3	1	1	1	1	3	5	5	5	5	5	5	4	5	5	4	4	1	1	1	1	1	1	1	1	2	1	2	1	1	1	1	1	1	1	1	1	1	1
271020	6	2	1	8	1	4	5	5	3	5	5	5	5	5	5	5	4	5	5	3	3	5	5	5	5	5	4	1	1	1	1	1	1	1	1	2	2	1	1	1	1	1	1	1	1	1	1	1	1
272452	2	5	1	6	1	4	3	3	3	3	3	3	3	3	3	3	5	5	5	5	5	5	5	5	5	5	4	1	1	1	1	1	1	1	1	1	1	1	1	1	1	1	1	1	1	1	1	1	1
275151	3	2	1	6	1	4	4	4	3	3	4	3	2	1	1	1	4	5	5	5	5	5	5	5	5	5	5	4	1	1	1	1	1	1	1	3	1	1	1	1	1	1	1	1	1	1	1	3	3
275524	2	6	1	6	1	4	5	4	3	4	3	3	3	3	3	3	3	5	5	5	5	5	4	4	5	4	5	1	1	1	1	1	1	1	1	3	1	1	1	1	1	1	1	1	1	1	1	1	1
276884	3	8	2	3	1	4	4	3	1	1	2	1	1	1	1	1	3	5	5	5	5	5	5	4	4	4	5	1	1	1	1	1	1	1	1	1	1	1	1	1	1	1	1	1	1	1	1	1	1
277336	2	12	1	2	1	4	4	4	1	3	1	1	1	1	1	3	4	5	5	5	5	5	5	5	5	5	5	1	1	1	1	1	1	1	1	2	1	1	1	1	1	1	1	1	1	1	1	1	1
277626	2	8	1	6	1	4	5	3	2	5	2	1	1	5	3	4	5	5	5	5	5	5	5	5	5	5	4	1	1	1	1	1	1	1	1	1	1	1	1	1	1	1	1	1	1	1	1	1	1
278140	4	2	2	5	1	4	4	4	2	2	4	2	2	2	2	2	4	5	5	5	5	5	5	5	5	5	1	1	1	1	1	1	1	1	1	5	1	1	1	1	1	1	1	1	1	1	1	1	1
278665	2	2	1	9	1	4	4	4	1	1	1	1	1	1	1	1	4	5	5	5	5	5	5	5	5	5	3	2	1	1	1	1	1	1	1	3	2	1	1	1	1	1	1	1	1	1	1	1	1
280597	3	12	1	4	1	4	4	5	1	2	3	2	1	1	1	1	5	5	4	5	4	5	2	4	5	4	4	1	1	1	1	1	1	1	1	1	1	1	1	1	1	1	1	1	1	1	1	1	1
282140	46	13	2	3	1	4	5	3	1	2	2	2	2	2	2	2	5	5	5	5	5	4	5	4	4	5	2	5	1	1	1	1	1	1	1	1	1	1	1	1	1	1	1	1	1	1	1	1	1
285740	2	5	1	9	1	4	2	2	2	2	2	2	2	2	2	2	3	2	2	1	1	1	2	3	3	5	5	2	1	1	1	1	1	1	1	3	1	1	1	1	1	1	1	1	1	1	1	1	1
285907	2	12	1	3	1	4	3	3	3	3	3	3	2	3	3	2	5	5	5	5	4	5	5	5	5	5	1	1	1	1	1	1	1	1	1	1	1	1	1	1	1	1	1	1	1	1	1	1	1
287945	2	12	1	5	1	4	5	4	2	4	4	3	4	2	1	3	4	5	4	4	4	5	4	5	5	3	1	1	1	1	1	1	1	1	1	3	1	1	1	1	1	1	1	1	1	1	1	1	1
289607	2	13	1	7	1	4	4	1	1	3	1	1	1	1	1	1	5	5	5	5	5	5	1	5	5	5	2	1	1	1	1	1	1	1	1	3	1	1	1	1	1	1	1	1	1	1	1	2	1
290517	2	13	1	3	1	4	4	4	2	4	3	2	1	1	1	2	3	3	3	3	3	3	4	4	4	3	5	1	1	1	1	1	1	1	1	1	1	1	1	1	1	1	1	1	1	1	1	1	1
291023	4	5	1	6	1	4	4	4	1	3	3	2	1	1	1	1	5	5	3	3	3	5	5	5	5	5	4	1	1	1	1	1	1	1	1	1	1	1	1	1	1	1	1	1	1	1	1	1	1
291910	2	2	1	6	1	4	2	4	1	1	1	1	1	1	1	2	5	5	5	5	5	5	5	5	5	5	5	1	1	1	1	1	1	1	1	1	1	1	1	1	1	1	1	1	1	1	1	1	1
292525	3	5	2	9	1	4	4	4	3	3	3	2	2	4	3	3	5	5	4	4	5	5	5	5	5	5	4	1	1	1	1	1	1	1	1	1	1	1	1	1	1	1	1	1	1	1	1	1	1
292883	4	5	1	7	1	4	4	4	1	2	4	1	1	1	1	1	5	5	5	5	5	5	5	5	5	5	5	1	1	1	1	1	1	1	1	3	1	1	1	1	1	1	1	1	1	1	1	1	1
293088	2	7	1	4	1	4	3	3	1	2	2	1	1	3	3	3	5	5	4	5	4	4	3	3	3	4	4	1	1	1	1	1	1	1	1	1	1	1	1	1	1	1	1	1	1	1	1	1	1
293913	1	6	5	3	1	4	2	2	1	3	3	2	2	2	1	3	5	5	5	5	5	5	4	5	4	5	2	1	1	1	1	1	1	1	1	3	1	1	1	1	1	1	1	1	1	1	1	1	1
294030	1	2	2	3	1	4	4	4	3	4	4	4	4	3	3	3	3	3	3	3	3	3	3	3	3	3	3	5	1	1	1	1	1	1	1	5	1	2	2	2	2	2	2	1	1	3	1	1	1
294154	3	5	5	6	1	4	3	2	2	2	2	2	2	2	2	3	5	5	5	5	5	5	5	5	5	5	1	1	1	1	1	1	1	1	1	5	1	3	3	3	1	3	1	1	1	1	1	1	1
294165	4	2	1	6	1	4	2	3	1	1	1	1	1	4	4	4	5	5	5	5	5	5	5	5	5	5	3	1	1	1	1	1	1	1	1	3	1	1	1	1	1	1	1	1	1	1	1	2	1
294299	2	5	1	3	1	4	3	3	3	3	3	3	3	3	3	3	5	5	5	5	5	5	5	5	5	5	5	1	1	1	1	1	1	1	1	3	3	1	1	1	1	1	1	1	1	1	1	1	1
295154	3	13	1	6	1	4	4	4	2	4	3	2	2	2	2	2	5	5	5	5	5	5	5	5	5	5	5	1	1	1	1	1	1	1	1	5	1	4	1	1	1	1	1	1	1	1	1	1	1
296077	2	5	1	3	1	4	4	4	2	2	3	1	1	1	1	2	5	5	5	5	5	5	5	5	5	5	5	1	1	1	1	1	1	1	1	2	1	1	1	1	1	5	1	1	1	1	1	1	1
296333	2	12	1	3	1	4	4	3	1	3	3	1	1	1	1	1	5	5	5	5	5	5	5	5	5	5	1	1	1	1	1	1	1	1	1	1	1	1	1	1	1	1	1	1	1	1	1	1	1
296893	2	12	1	6	1	4	4	4	1	4	3	1	1	4	1	3	4	4	3	4	4	5	4	5	4	5	2	1	1	1	1	1	1	1	1	1	1	1	1	1	1	1	1	1	1	1	1	1	1
297037	4	8	1	4	1	4	4	4	2	2	3	2	2	1	1	4	4	4	3	3	4	4	3	3	3	3	2	1	1	1	1	1	1	1	1	2	1	1	1	1	1	1	1	1	1	1	1	1	1
297302	3	8	1	7	1	4	2	2	1	1	1	1	1	3	3	3	5	5	5	5	5	5	5	5	5	5	4	5	5	5	5	5	5	5	5	1	1	1	1	1	1	1	1	1	1	1	1	1	1
297746	2	8	1	8	1	4	4	4	2	3	4	1	1	2	2	2	5	5	5	5	5	5	5	5	5	5	2	1	1	1	1	1	1	1	1	1	1	1	1	1	1	1	1	1	1	1	1	1	1
297976	3	12	1	4	1	4	4	4	3	3	3	2	2	1	1	3	5	5	5	5	5	5	4	5	5	5	4	1	1	1	1	1	1	1	1	1	1	1	1	1	1	1	1	1	1	1	1	1	1
299367	4	4	1	6	1	4	3	3	3	1	1	2	1	2	2	1	4	5	4	4	4	5	5	5	5	4	5	1	1	1	1	1	1	1	1	2	3	3	3	2	4	3	4	3	5	3	2	1	5
299641	2	13	1	3	2	4	2	2	1	1	1	1	1	1	1	2	5	5	5	5	5	5	5	5	5	5	5	1	1	1	1	1	1	1	1	3	2	1	1	1	1	1	1	1	2	1	1	2	2
299839	2	11	2	4	1	4	3	3	1	1	1	1	1	1	1	1	5	5	5	5	5	5	5	5	5	5	4	1	1	1	1	1	1	1	1	1	1	1	1	1	1	1	1	1	1	1	1	1	1
300111	3	13	1	3	1	4	4	4	4	4	4	3	3	3	3	3	5	5	5	5	5	5	5	5	5	5	1	1	1	1	1	1	1	1	1	3	1	1	1	1	1	1	1	1	1	1	1	1	1
300185	3	8	5	4	1	4	3	3	3	3	3	3	3	3	3	3	5	5	5	5	5	5	5	5	5	5	1	1	1	1	1	1	1	1	1	1	1	1	1	1	1	1	1	1	1	1	1	1	1
300303	2	4	1	5	1	4	2	2	1	1	2	1	1	1	1	4	5	5	5	5	5	5	5	5	5	5	2	2	1	1	1	1	1	1	1	1	1	1	1	1	1	1	1	1	1	1	1	1	1
301325	4	13	2	7	1	4	5	5	1	3	4	1	1	1	1	1	5	5	5	5	5	4	1	5	5	5	1	4	1	1	1	1	1	1	1	3	1	1	1	1	1	1	1	1	1	2	1	1	1
302608	4	12	1	6	1	4	5	5	2	5	4	2	2	1	1	5	4	5	5	5	2	5	5	5	5	5	2	1	1	1	1	1	1	1	1	1	1	1	1	1	1	1	1	1	1	1	1	1	1
303419	2	12	1	3	1	4	5	5	1	4	4	1	1	3	1	3	5	5	5	5	5	5	5	5	5	5	2	1	1	1	1	1	1	1	1	1	1	1	1	1	1	1	1	1	1	1	1	1	1
303599	1	13	1	6	1	4	4	4	4	4	4	4	4	4	4	4	5	5	5	5	5	5	5	5	5	5	4	1	1	1	1	1	1	1	1	5	1	1	1	1	1	1	1	1	1	1	1	1	1
303794	1	2	2	6	1	4	3	1	1	1	1	1	1	1	1	1	5	5	5	5	5	5	5	5	5	5	4	5	1	1	1	1	1	1	1	1	1	1	1	1	1	1	1	1	1	1	1	1	1
303988	2	12	1	5	1	4	4	4	4	4	4	4	4	4	3	3	3	3	3	3	3	3	3	3	3	3	4	1	1	1	1	1	1	1	1	2	1	1	1	1	1	1	1	1	1	1	1	1	1
306007	2	5	2	3	1	4	1	1	1	1	1	1	1	1	1	1	5	5	5	5	5	5	5	5	5	5	1	1	1	1	1	1	1	1	1	5	1	1	4	1	5	1	1	1	1	1	1	1	1
306351	2	8	1	6	1	4	4	1	1	4	1	1	1	1	1	4	5	5	5	5	5	5	5	5	5	5	4	1	1	1	1	1	1	1	1	5	1	1	1	1	1	1	1	1	1	1	1	1	1
307647	3	10	2	6	3	4	4	4	2	4	4	2	3	3	3	3	4	3	4	3	3	4	3	3	3	4	4	5	1	1	1	1	1	1	1	1	1	1	1	1	1	1	1	1	1	1	1	1	1
308437	4	4	2	6	1	4	4	3	2	3	3	2	2	3	3	3	5	5	5	5	5	5	5	5	5	5	1	1	1	1	1	1	1	1	1	1	1	1	1	1	1	1	1	1	1	1	1	1	1
308514	1	12	3	3	1	4	5	2	2	4	4	2	2	1	1	4	5	5	5	5	5	5	5	5	5	5	4	5	5	5	5	5	5	5	5	1	1	1	1	1	1	1	1	1	1	1	1	1	1
308550	2	5	1	3	1	4	2	2	1	2	2	1	1	1	1	2	5	5	5	3	4	4	4	4	4	4	3	4	1	1	1	1	1	1	1	3	1	1	1	1	1	1	1	1	1	1	1	1	1
309848	2	12	1	6	1	4	2	1	1	1	1	1	1	1	1	1	5	5	5	5	5	5	5	5	5	5	5	1	1	1	1	1	1	1	1	1	1	1	1	1	1	1	1	1	1	1	1	1	1
310669	3	8	1	7	1	4	3	3	3	3	2	3	3	3	3	3	3	3	3	2	4	3	3	3	2	3	4	4	1	1	1	1	1	1	1	1	1	1	1	1	1	1	1	1	1	1	1	1	1
310849	4	2	1	6	1	4	3	3	2	3	2	2	2	2	2	2	4	4	4	4	5	4	4	5	5	5	4	1	1	1	1	1	1	1	1	2	1	1	1	1	1	1	1	1	1	1	1	1	1
311091	1	8	2	3	1	4	4	4	1	4	4	1	1	4	1	4	4	5	5	4	1	3	1	3	2	4	2	1	1	1	1	1	1	1	1	1	1	1	1	1	1	1	1	1	1	1	1	1	1
311465	3	5	1	7	1	4	2	1	1	1	1	1	1	1	2	1	5	5	5	5	5	5	5	5	5	5	4	2	1	1	1	1	1	1	1	3	1	1	1	1	1	1	1	1	1	1	1	1	1
313329	2	2	1	6	1	4	5	5	1	2	2	1	1	3	2	3	5	5	5	5	5	5	5	5	5	5	5	1	1	1	1	1	1	1	1	5	1	1	1	1	1	1	1	1	1	1	1	1	1
314295	1	13	2	3	1	4	4	4	2	4	3	1	1	1	1	2	5	4	4	4	4	5	2	2	2	2	5	2	1	1	1	1	1	2	1	2	1	1	1	1	1	1	1	1	1	1	1	2	2
314551	4	2	2	7	1	4	3	3	1	3	1	1	1	1	1	3	5	5	5	5	5	5	5	5	5	5	5	1	1	1	1	1	1	1	1	5	1	1	1	1	1	1	1	1	1	1	1	1	1
317010	3	5	1	6	1	4	4	5	1	4	2	1	1	1	1	1	4	3	3	3	3	5	5	5	5	5	5	1	1	1	1	1	1	1	1	3	1	1	1	1	1	1	1	1	1	1	1	2	1
317221	2	11	5	3	2	4	3	2	1	1	1	1	1	1	1	1	5	5	5	5	5	5	5	5	5	5	3	1	1	1	1	1	1	1	1	3	1	1	1	1	1	1	1	1	1	1	1	1	1
317422	3	5	1	6	1	4	4	4	2	3	3	1	1	4	1	4	5	5	5	5	5	4	3	3	4	2	2	1	1	1	1	1	1	1	1	1	1	1	1	1	1	1	1	1	1	1	1	1	1
317687	1	13	2	2	1	4	3	3	1	1	2	1	1	1	1	2	4	5	4	5	5	4	1	1	1	1	4	1	1	1	1	1	1	1	1	3	1	1	1	1	1	1	1	1	1	1	1	1	1
318357	3	8	5	2	1	4	2	4	1	3	2	1	1	1	1	3	4	4	3	4	5	4	5	4	5	4	2	2	1	1	1	1	1	1	1	3	1	1	1	1	1	1	1	1	1	1	1	1	1
319276	2	13	1	9	1	4	5	5	1	3	3	1	1	3	3	3	5	5	5	5	5	5	5	5	5	5	4	1	1	1	1	1	1	1	1	1	1	1	1	1	1	1	1	1	1	1	1	1	1
319477	1	1	2	6	1	4	1	4	1	1	1	1	1	1	1	1	5	5	5	5	5	4	4	4	4	5	4	1	1	1	1	1	1	1	1	5	4	3	3	3	3	3	3	3	3	3	3	3	3
319603	4	8	1	3	1	4	4	4	3	4	4	3	4	4	4	4	1	1	1	2	1	2	1	1	1	1	5	1	1	1	1	1	1	1	1	1	1	1	1	1	1	1	1	1	1	1	1	1	1
320713	2	6	2	3	1	4	1	1	1	1	1	1	1	1	1	1	5	5	5	5	5	5	5	5	5	5	1	1	1	1	1	1	1	1	1	1	1	1	1	1	1	1	1	1	1	1	1	1	1
321068	5	8	1	5	1	4	4	4	2	4	2	1	1	1	1	2	3	3	2	4	4	4	3	3	3	4	4	2	1	1	1	1	1	1	1	2	1	1	1	1	1	1	1	1	1	1	1	1	1
322149	1	5	2	6	1	4	4	4	1	4	3	1	1	2	2	2	4	4	5	4	4	3	2	3	3	3	5	3	1	1	1	1	1	1	1	3	1	2	1	1	1	1	1	1	1	1	1	1	1
322153	4	8	1	6	1	4	5	5	5	5	5	5	5	5	5	5	1	1	1	1	1	1	1	1	1	1	1	1	1	1	1	1	1	1	1	1	1	1	1	1	1	1	1	1	1	1	1	1	1
322427	5	5	1	6	1	4	4	4	2	1	3	1	1	1	1	1	5	5	3	3	3	5	2	4	3	2	4	1	1	1	1	1	1	1	1	3	3	3	4	1	3	5	1	1	1	1	1	3	1
322831	1	12	3	3	1	4	4	4	3	3	4	3	3	1	1	3	4	5	4	4	4	4	4	4	4	5	1	1	1	1	1	1	1	1	1	3	1	1	1	1	1	1	1	1	1	1	1	1	1
323015	2	5	1	6	1	4	5	1	1	5	1	1	1	1	1	5	5	5	5	5	5	5	5	5	5	5	4	1	1	1	1	1	1	1	1	3	2	1	1	1	1	1	1	1	2	2	2	3	2
324147	2	12	1	2	1	4	2	4	1	1	2	1	1	1	1	3	5	5	5	5	5	5	5	5	5	5	2	1	1	1	1	1	1	1	1	1	1	1	1	1	1	1	1	1	1	1	1	1	1
324832	2	12	1	9	1	4	4	4	1	1	1	1	1	1	1	1	5	5	5	5	4	5	4	5	5	5	4	1	1	1	1	1	1	1	1	3	2	1	1	1	1	1	1	1	2	2	2	2	1
326265	4	5	1	6	1	4	3	3	3	3	3	3	3	3	3	3	5	5	5	5	5	5	5	5	5	5	1	1	1	1	1	1	1	1	1	1	1	1	1	1	1	1	1	1	1	1	1	1	1
327448	3	13	5	6	1	4	5	5	2	2	4	1	1	1	1	1	1	1	1	1	4	5	1	1	1	1	2	1	1	1	1	1	1	1	1	3	1	1	1	1	1	1	1	1	1	1	1	1	1
328129	1	13	3	6	1	4	4	4	2	4	2	2	1	1	1	3	5	5	4	4	5	5	2	5	5	5	1	1	1	1	1	1	1	1	1	3	3	1	1	1	1	1	1	1	1	1	1	1	1
329160	3	2	1	3	1	4	3	3	3	3	1	1	1	1	1	1	5	5	5	5	5	5	5	5	5	5	5	1	1	1	1	1	1	1	1	5	1	1	1	1	1	1	1	1	1	1	1	1	1
329317	2	12	1	4	1	4	5	4	2	3	3	2	2	1	1	2	5	5	5	5	5	4	3	4	4	4	4	1	1	1	1	1	1	1	1	1	1	1	1	1	1	1	1	1	1	1	1	1	1
330378	3	12	1	6	1	4	3	3	3	3	3	3	3	3	3	3	5	5	5	5	5	5	5	5	5	5	1	1	1	1	1	1	1	1	1	5	1	2	2	2	5	2	1	1	1	2	1	1	2
330698	3	5	2	6	1	4	4	4	2	4	4	2	2	4	3	4	4	3	3	3	3	3	3	3	3	4	2	1	1	1	1	1	1	1	1	1	1	1	1	1	1	1	1	1	1	1	1	1	1
330791	2	12	1	3	1	4	5	5	5	5	5	5	5	5	5	5	5	5	5	5	5	5	5	5	5	5	4	1	1	1	1	1	1	1	1	1	1	1	1	1	1	1	1	1	1	1	1	1	1
332428	3	4	2	4	1	4	3	2	1	2	2	1	1	1	1	1	5	5	5	5	4	5	5	5	5	5	5	1	1	1	1	1	1	1	1	1	1	1	1	1	1	1	1	1	1	1	1	1	1
332554	3	4	1	3	1	4	2	4	1	1	2	1	1	1	1	2	5	5	5	5	5	5	5	5	5	5	5	1	1	1	1	1	1	1	1	1	1	1	1	1	1	1	1	1	1	1	1	1	1
333291	1	2	2	4	1	4	4	4	1	3	4	2	2	3	3	4	3	3	2	3	4	4	2	3	3	2	2	5	1	1	1	1	1	1	1	1	1	1	1	1	1	1	1	1	1	1	1	1	1
336022	4	5	1	6	1	4	4	4	3	4	3	3	3	2	3	2	3	3	3	3	2	2	3	3	3	3	4	1	1	1	1	1	1	1	1	3	1	1	1	1	1	1	1	1	1	1	1	1	1
336818	2	8	1	3	1	4	4	4	2	3	4	1	1	2	2	2	3	5	3	3	5	5	5	5	5	5	5	1	1	1	1	1	1	1	1	5	1	1	1	1	1	1	1	1	1	2	1	1	1
338014	1	8	3	3	1	4	4	1	1	2	2	1	1	1	1	1	5	5	5	4	5	5	5	5	5	5	5	1	1	1	1	1	1	1	1	1	1	1	1	1	1	1	1	1	1	1	1	1	1
341044	1	1	5	6	1	4	4	3	1	2	2	1	1	3	1	2	3	5	4	4	4	4	3	4	3	3	5	1	1	1	1	1	1	1	1	2	1	1	1	1	1	1	1	1	1	1	1	1	1
341429	6	4	1	6	1	4	1	1	1	1	1	1	1	1	1	1	5	5	5	5	5	5	5	5	5	5	5	1	1	1	1	1	1	1	1	1	1	1	1	1	1	1	1	1	1	1	1	1	1
341522	2	8	1	6	1	4	3	2	1	3	1	1	1	1	1	3	5	5	5	5	5	5	5	5	5	5	5	1	1	1	1	1	1	1	1	5	1	4	1	1	1	1	1	1	1	3	1	1	1
341822	6	13	2	3	2	4	3	4	2	2	2	1	1	5	5	5	4	5	5	4	5	4	2	4	4	5	1	1	1	1	1	1	1	1	1	1	1	1	1	1	1	1	1	1	1	1	1	1	1
343987	1	11	5	3	1	4	5	5	4	5	4	2	2	2	2	2	5	4	4	5	5	5	4	5	5	5	5	1	1	1	1	1	1	1	1	1	1	1	1	1	1	1	1	1	1	1	1	1	1
345163	3	11	1	3	1	4	5	5	3	5	5	3	3	4	4	4	5	5	5	4	4	5	5	5	5	5	2	1	1	1	1	1	1	1	1	3	1	1	1	1	1	1	1	1	1	1	1	3	1
345418	3	8	1	7	1	4	3	2	3	3	3	3	3	3	3	3	5	5	5	5	5	5	5	5	5	5	5	1	1	1	1	1	1	1	1	3	3	1	1	1	1	1	1	1	2	1	1	1	1
345992	4	12	1	2	1	4	5	4	2	4	4	2	3	3	1	5	4	5	5	4	5	5	4	5	5	5	2	1	1	1	1	1	1	1	1	3	1	1	1	1	1	1	1	1	1	1	1	1	1
347576	3	4	1	4	1	4	3	3	3	3	3	3	3	3	3	3	5	5	5	5	5	5	5	5	5	5	4	1	1	1	1	1	1	1	1	3	1	1	1	1	1	1	1	1	1	1	1	1	1
347613	3	5	1	2	1	4	4	4	1	3	3	1	1	1	1	1	5	5	5	5	5	4	4	4	5	5	4	5	1	1	1	1	1	1	1	3	1	3	1	1	3	5	1	2	1	1	1	1	1
347865	1	2	2	6	1	4	2	2	2	2	2	2	2	3	1	3	5	5	5	5	5	5	2	5	4	5	4	1	1	1	1	1	1	1	1	3	1	1	1	1	1	1	1	1	1	1	1	1	1
347888	2	12	1	4	1	4	4	4	2	4	3	2	2	1	1	2	5	5	4	4	4	5	3	4	4	4	4	1	1	1	1	1	1	1	1	1	1	1	1	1	1	1	1	1	1	1	1	1	1
348006	2	13	1	3	1	4	4	3	3	3	4	1	1	1	1	1	5	5	5	5	5	5	5	5	5	5	5	1	1	1	1	1	1	1	1	1	1	1	1	1	1	1	1	1	1	1	1	1	1
349109	2	12	1	6	1	4	4	2	1	2	2	1	1	1	1	1	5	5	5	5	5	4	3	5	5	5	4	1	1	1	1	1	1	1	1	1	1	1	1	1	1	1	1	1	1	1	1	1	1
349409	5	12	1	5	1	4	4	4	3	3	3	3	3	3	3	4	4	4	4	4	4	4	3	4	5	5	4	5	1	1	1	1	1	1	1	1	1	1	1	1	1	1	1	1	1	1	1	1	1
349443	4	5	1	2	1	4	5	5	1	5	1	2	1	1	1	3	5	5	5	5	5	5	1	1	1	1	3	1	1	1	1	1	1	1	1	3	3	1	1	1	1	1	1	1	3	3	1	2	1
349598	2	13	1	8	1	4	2	2	2	2	2	2	2	2	2	2	5	5	5	5	5	5	5	5	5	5	5	1	1	1	1	1	1	1	1	5	1	1	4	1	5	1	1	1	1	1	1	1	1
349909	2	12	1	5	1	4	4	4	2	4	2	2	2	2	2	3	4	5	5	5	5	5	5	5	5	5	1	1	1	1	1	1	1	1	1	1	1	1	1	1	1	1	1	1	1	1	1	1	1
350666	4	2	1	2	1	4	2	2	2	2	2	1	1	1	1	2	4	4	4	4	3	4	4	3	4	4	3	1	1	1	1	1	1	1	1	5	1	1	1	1	1	1	1	1	1	1	1	1	1
350963	3	7	2	3	1	4	3	3	1	2	4	1	1	3	1	5	5	5	5	5	5	4	1	5	5	5	2	1	1	1	1	1	1	1	1	1	1	1	1	1	1	1	1	1	1	1	1	1	1
352158	4	5	1	3	1	4	3	1	1	2	2	1	1	1	1	3	5	5	5	5	4	5	4	5	5	5	5	1	1	1	1	1	1	1	1	3	1	1	1	1	1	1	1	1	1	1	1	1	1
352656	3	4	1	6	1	4	4	4	2	4	3	2	2	1	1	3	5	5	5	3	5	5	5	5	5	5	5	1	1	1	1	1	1	1	1	3	1	1	1	1	1	1	1	1	1	1	1	1	1
353226	2	2	1	5	1	4	4	3	4	3	3	3	3	3	3	3	5	5	5	5	5	5	5	5	5	4	1	1	1	1	1	1	1	1	1	1	1	1	1	1	1	1	1	1	1	1	1	1	1
353261	3	5	1	5	1	4	4	4	2	2	2	2	2	2	2	2	5	5	5	5	5	5	5	5	5	5	4	1	1	1	1	1	1	1	1	1	1	1	1	1	1	1	1	1	1	1	1	1	1
355258	5	5	1	6	1	4	2	2	2	2	2	1	1	3	4	4	5	4	5	4	4	4	4	4	5	5	5	1	1	1	1	1	1	1	1	5	1	4	4	1	1	1	1	1	1	1	1	1	1
355353	2	12	1	7	1	4	4	5	3	3	4	2	3	1	2	3	4	5	4	5	5	5	4	5	5	5	4	1	1	1	1	1	1	1	1	1	1	1	1	1	1	1	1	1	1	1	1	1	1
355485	2	4	2	3	1	4	4	3	2	3	3	2	2	1	1	3	3	5	3	5	5	5	4	5	5	4	2	1	1	1	1	1	1	1	1	2	1	1	1	1	1	1	1	1	1	1	1	1	1
355628	2	11	1	6	1	4	4	1	1	4	1	1	1	1	1	3	5	5	5	5	5	5	5	5	5	5	5	1	1	1	1	1	1	1	1	5	1	2	4	1	5	2	1	1	1	1	1	1	1
357107	2	5	1	5	1	4	5	4	1	5	3	1	3	1	1	1	3	5	3	3	4	5	4	4	4	4	4	2	1	1	1	1	1	1	1	2	1	1	1	1	1	1	1	1	1	1	1	1	1
358287	1	7	5	3	1	4	4	4	2	4	4	2	2	3	3	3	5	5	5	5	5	5	5	5	5	5	2	1	1	1	1	1	1	1	1	2	1	1	1	1	1	1	1	1	1	1	1	1	1
359143	3	7	1	6	1	4	5	3	2	3	3	1	1	1	1	1	5	5	5	5	5	5	5	5	5	5	5	1	1	1	1	1	1	1	1	2	1	1	1	1	1	1	1	1	1	1	1	1	1
360501	2	1	1	6	1	4	2	3	3	3	3	3	3	3	3	3	3	3	3	3	3	3	3	3	3	3	1	1	1	1	1	1	1	1	1	1	1	1	1	1	1	1	1	1	1	1	1	1	1
361768	2	13	2	8	1	4	2	4	2	1	3	1	1	1	1	3	5	5	3	3	3	3	2	5	4	5	4	1	1	1	1	1	1	1	1	1	1	1	1	1	1	1	1	1	1	1	1	1	1
362287	2	12	1	3	1	4	4	2	1	3	3	1	1	1	1	3	4	5	5	4	5	4	5	4	5	4	4	1	1	1	1	1	1	1	1	1	1	1	1	1	1	1	1	1	1	1	1	1	1
363451	3	12	1	5	1	4	5	4	3	4	4	3	2	1	1	3	5	5	5	5	5	5	4	5	5	5	4	1	1	1	1	1	1	1	1	1	1	1	1	1	1	1	1	1	1	1	1	1	1
363663	3	12	1	6	1	4	5	5	1	5	5	5	1	1	1	1	1	3	4	4	4	5	5	5	5	5	1	1	1	1	1	1	1	1	1	1	1	1	1	1	1	1	1	1	1	1	1	1	1
364839	2	13	1	7	1	4	5	2	1	4	4	1	1	1	1	3	3	3	4	4	5	4	4	5	4	5	1	1	1	1	1	1	1	1	1	1	1	1	1	1	1	1	1	1	1	1	1	1	1
365855	1	5	2	7	1	4	5	4	2	4	4	2	1	2	2	2	5	5	5	5	5	5	5	5	5	5	4	1	1	1	1	1	1	1	1	1	1	1	1	1	1	1	1	1	1	1	1	1	1
366027	3	12	1	8	2	4	3	3	1	1	1	1	1	1	1	3	5	5	5	5	5	5	5	5	5	5	2	1	1	1	1	1	1	1	1	1	1	1	1	1	1	1	1	1	1	1	1	1	1
366627	2	6	2	6	1	4	3	3	3	3	4	3	3	1	1	4	4	3	5	5	3	3	5	1	3	5	1	1	1	1	1	1	1	1	1	1	1	1	1	1	1	1	1	1	1	1	1	1	1
368884	2	12	1	1	1	4	4	4	4	5	4	3	3	1	3	3	5	5	5	5	5	5	5	5	5	5	4	2	1	1	1	1	1	1	1	1	1	1	1	1	1	1	1	1	1	1	1	1	1
369040	4	13	1	1	1	4	5	5	2	5	3	1	1	1	1	2	5	5	5	5	5	5	5	5	5	5	5	1	1	1	1	1	1	1	1	3	1	1	1	1	1	1	1	1	1	1	1	1	1
369339	2	13	1	9	1	4	1	1	1	1	1	1	1	1	1	1	3	3	3	3	3	3	3	3	3	3	5	2	1	1	1	1	1	1	1	1	1	1	1	1	1	1	1	1	1	1	1	1	1
369543	6	12	1	5	1	4	5	4	1	3	1	1	1	1	1	2	5	5	5	5	5	5	5	5	5	5	2	1	1	1	1	1	1	1	1	1	1	1	1	1	1	1	1	1	1	1	1	1	1
370242	1	5	2	3	1	4	3	3	2	2	2	2	2	3	3	3	4	5	4	5	5	5	4	5	5	5	4	1	1	1	1	1	1	1	1	5	1	2	1	1	2	1	1	1	1	2	1	1	4
370577	1	5	2	9	1	4	3	4	1	2	2	1	1	1	1	3	5	5	5	5	5	5	5	5	5	5	2	1	1	1	1	1	1	1	1	1	1	1	1	1	1	1	1	1	1	1	1	1	1
370596	5	7	1	8	1	4	3	4	2	3	2	1	1	3	2	2	5	5	5	5	5	5	5	5	5	5	5	1	1	1	1	1	1	1	1	3	2	1	1	1	1	1	1	1	1	1	1	2	2
370597	2	12	1	3	1	4	5	5	1	5	3	2	1	3	1	3	5	5	5	5	5	5	5	5	5	5	1	1	1	1	1	1	1	1	1	1	1	1	1	1	1	1	1	1	1	1	1	1	1
372540	2	5	2	3	1	4	3	3	3	3	3	3	3	3	3	3	5	5	5	5	5	5	5	5	5	5	4	1	1	1	1	1	1	1	1	1	1	1	1	1	1	1	1	1	1	1	1	1	1
372612	4	5	1	8	1	4	5	3	3	4	3	1	1	3	3	3	5	5	5	5	5	5	5	5	5	5	5	1	1	1	1	1	1	1	1	3	3	3	3	5	3	1	1	1	1	1	1	1	1
372784	4	2	2	4	1	4	3	3	3	3	3	3	3	1	1	3	3	3	3	3	3	3	3	3	3	3	4	1	1	1	1	1	1	1	1	5	1	1	1	1	1	1	1	1	1	1	1	1	1
373349	1	11	2	4	1	4	3	4	1	3	2	2	2	2	2	2	4	5	5	5	5	5	5	5	5	5	4	1	1	1	1	1	1	1	1	1	1	1	1	1	1	1	1	1	1	1	1	1	1
373379	2	13	1	6	1	4	4	4	4	4	4	4	4	3	3	4	4	4	4	4	4	4	4	4	4	4	1	1	1	1	1	1	1	1	1	1	1	1	1	1	1	1	1	1	1	1	1	1	1
374728	5	5	1	6	1	4	4	3	3	3	2	1	1	1	1	2	2	4	5	5	5	5	5	5	5	5	1	1	1	1	1	1	1	1	1	1	1	1	1	1	1	1	1	1	1	1	1	1	1
376397	4	5	2	3	1	4	4	4	2	3	3	1	1	1	3	3	5	5	5	5	3	4	4	4	4	4	5	1	1	1	1	1	1	1	1	1	1	1	1	1	1	1	1	1	1	1	1	1	1
376679	1	8	5	4	1	4	1	1	1	1	1	1	1	1	1	1	5	5	5	5	3	5	4	5	5	5	4	1	1	1	1	1	1	1	1	5	1	1	1	1	1	1	1	1	1	1	1	1	1
380186	4	5	1	6	1	4	3	3	2	2	3	3	2	3	3	3	5	5	5	5	5	5	4	5	5	5	4	1	1	1	1	1	1	1	1	5	1	1	1	1	1	1	1	1	1	1	1	1	1
380707	1	13	2	2	1	4	5	5	1	3	5	1	1	1	1	1	4	5	5	5	5	5	5	5	5	5	1	1	1	1	1	1	1	1	1	1	1	1	1	1	1	1	1	1	1	1	1	1	1
381426	3	13	5	6	1	4	5	4	1	5	1	1	1	1	2	2	5	5	5	5	5	5	5	5	5	5	2	1	1	1	1	1	1	1	1	3	1	2	1	1	1	1	1	1	1	2	1	1	1
382086	1	8	5	6	1	4	4	4	2	3	3	2	2	3	1	2	4	4	4	4	4	4	4	4	4	3	5	1	1	1	1	1	1	1	1	3	1	1	1	1	1	1	1	1	1	1	1	2	1
383698	1	8	5	4	1	4	3	3	1	1	2	1	1	1	1	4	5	4	4	4	4	3	3	3	3	3	2	1	1	1	1	1	1	1	1	1	1	1	1	1	1	1	1	1	1	1	1	1	1
384284	4	2	1	7	1	4	3	3	3	3	3	3	3	3	3	3	4	4	4	4	4	4	4	4	4	4	1	1	1	1	1	1	1	1	1	1	1	1	1	1	1	1	1	1	1	1	1	1	1
384552	2	5	3	3	1	4	4	4	4	4	4	4	4	4	4	4	3	5	4	4	5	5	5	5	5	5	5	1	1	1	1	1	1	1	1	1	1	1	1	1	1	1	1	1	1	1	1	1	1
384602	2	8	1	6	1	4	3	2	2	4	3	2	2	3	4	3	3	2	2	3	3	2	4	3	2	2	5	1	1	1	1	1	1	1	1	3	2	1	1	1	1	1	1	1	1	1	1	2	1
384735	2	13	1	7	1	4	3	3	2	2	2	2	2	1	1	2	5	5	5	5	5	5	5	5	5	5	2	1	1	1	1	1	1	1	1	5	1	2	2	1	1	2	1	1	1	1	1	1	2
387438	2	5	1	6	1	4	4	4	3	3	4	1	1	1	2	2	5	5	4	4	5	5	5	5	5	5	4	1	1	1	1	1	1	1	1	1	1	1	1	1	1	1	1	1	1	1	1	1	1
388590	1	5	3	6	1	4	4	4	2	3	2	4	2	3	2	2	4	4	4	4	4	4	4	4	4	4	4	5	5	5	5	5	5	5	5	1	1	1	1	1	1	1	1	1	1	1	1	1	1
391217	2	12	1	5	1	4	4	4	1	3	1	1	1	4	2	2	4	5	5	4	5	5	5	5	5	5	4	2	1	1	1	1	1	1	1	1	1	1	1	1	1	1	1	1	1	1	1	1	1
391327	4	2	1	6	1	4	4	4	2	3	1	1	1	1	1	2	5	5	5	5	5	5	5	5	5	5	5	1	1	1	1	1	1	1	1	5	1	4	1	1	1	1	1	1	1	1	1	1	1
391447	3	7	1	6	1	4	4	4	2	3	3	2	2	2	2	2	5	5	5	5	5	5	5	5	5	5	5	1	1	1	1	1	1	1	1	3	1	1	1	1	1	1	1	1	1	1	1	3	1
394934	2	7	1	6	1	4	1	1	1	1	1	1	1	1	1	1	5	5	5	5	5	5	5	5	5	5	4	4	1	1	1	1	1	1	1	1	1	1	1	1	1	1	1	1	1	1	1	1	1
395114	1	13	5	2	1	4	2	1	1	2	1	1	1	2	2	2	5	5	5	5	5	5	1	3	2	3	5	2	1	1	1	1	1	2	1	3	1	1	1	1	1	1	1	1	1	1	1	2	1
395153	2	5	5	3	1	4	4	4	2	3	4	2	1	1	1	1	4	5	5	4	5	5	4	5	5	5	3	1	1	1	1	1	1	1	1	5	1	1	1	1	1	1	1	1	1	1	1	1	1
397129	2	12	1	5	1	4	2	3	1	2	3	1	1	1	1	2	4	5	5	5	4	5	5	5	5	5	5	1	1	1	1	1	1	1	1	1	1	1	1	1	1	1	1	1	1	1	1	1	1
397986	1	5	2	6	1	4	1	3	2	1	1	1	1	2	1	3	4	4	5	4	4	3	3	4	3	4	2	1	1	1	1	1	1	1	1	5	1	1	1	1	1	2	1	1	1	1	1	1	1
398593	1	5	1	9	1	4	3	3	2	3	3	2	2	2	2	2	5	5	5	5	5	5	5	5	5	5	2	1	1	1	1	1	1	1	1	1	1	1	1	1	1	1	1	1	1	1	1	1	1
398884	2	5	1	3	1	4	4	4	1	3	1	1	1	1	1	3	5	5	5	5	4	5	2	5	5	5	4	1	1	1	1	1	1	1	1	1	1	1	1	1	1	1	1	1	1	1	1	1	1
401477	5	3	2	5	1	4	3	3	3	3	3	3	3	3	3	3	5	5	5	5	5	5	5	5	5	5	1	1	1	1	1	1	1	1	1	1	1	1	1	1	1	1	1	1	1	1	1	1	1
401806	3	2	1	6	1	4	5	5	2	4	4	3	2	1	1	1	4	3	3	3	4	4	4	4	4	3	4	2	1	1	1	1	1	3	2	3	2	1	1	1	1	1	1	1	1	1	1	2	1
403647	2	2	5	6	1	4	3	3	2	2	3	2	2	3	2	2	3	3	3	3	2	4	2	4	5	5	4	5	1	1	1	1	1	1	1	5	3	1	2	1	1	5	1	1	2	2	1	2	2
405179	3	12	1	4	1	4	4	4	1	4	1	1	1	1	1	3	5	5	5	5	5	5	5	5	5	5	4	1	1	1	1	1	1	1	1	1	1	1	1	1	1	1	1	1	1	1	1	1	1
405743	4	12	1	6	1	4	5	5	1	4	2	1	1	4	1	3	4	5	5	5	5	5	5	5	5	5	2	1	1	1	1	1	1	1	1	1	1	1	1	1	1	1	1	1	1	1	1	1	1
406043	2	11	1	3	1	4	3	2	1	3	2	1	1	1	1	1	5	5	5	5	5	5	5	5	5	5	4	1	1	1	1	1	1	1	1	1	1	1	1	1	1	1	1	1	1	1	1	1	1
406364	4	5	1	6	1	4	5	4	1	3	3	2	2	1	1	1	3	1	2	2	3	2	3	3	3	3	5	1	1	1	1	1	1	1	1	5	2	4	1	1	1	1	1	1	1	2	1	2	4
406402	3	8	1	2	1	4	4	4	4	4	4	4	4	2	2	2	4	5	4	4	5	5	5	5	5	5	5	2	1	1	1	1	1	1	1	1	1	1	1	1	1	1	1	1	1	1	1	1	1
407401	4	8	1	4	1	4	1	3	1	1	1	1	1	1	1	1	3	3	3	3	3	3	3	3	3	3	1	1	1	1	1	1	1	1	1	1	1	1	1	1	1	1	1	1	1	1	1	1	1
407614	2	7	2	4	2	4	2	2	1	1	2	1	1	2	2	2	5	5	5	5	5	5	2	3	2	5	5	4	1	1	1	1	1	1	1	1	1	1	1	1	1	1	1	1	1	1	2	1	5
407696	5	5	1	6	1	4	3	3	3	3	3	3	3	3	3	3	4	5	4	5	4	5	4	5	4	4	4	2	1	1	1	1	1	1	1	5	1	1	1	1	4	1	1	1	1	1	1	1	1
408964	3	8	5	3	1	4	5	4	1	4	4	1	1	1	1	3	5	5	5	5	5	3	3	3	3	5	2	1	1	1	1	1	1	1	1	1	1	1	1	1	1	1	1	1	1	1	1	1	1
409244	2	13	1	6	1	4	2	3	2	2	3	3	3	3	3	3	5	5	5	5	5	5	5	5	5	5	2	1	1	1	1	1	1	1	1	3	1	1	1	1	1	1	1	1	1	1	1	1	1
410572	4	5	1	6	1	4	4	5	5	4	4	2	4	1	1	2	2	3	3	2	2	3	3	3	2	3	5	1	1	1	1	1	1	1	1	1	1	1	1	1	1	1	1	1	1	1	1	1	1
411027	2	13	1	6	1	4	4	4	1	1	3	1	1	1	1	3	5	5	5	5	5	5	5	5	5	5	2	1	1	1	1	1	1	1	1	5	1	1	1	1	1	1	1	1	1	3	1	1	1
411211	1	8	2	5	1	4	4	5	1	4	4	1	1	3	3	4	4	4	5	4	5	4	5	5	5	5	1	1	1	1	1	1	1	1	1	1	1	1	1	1	1	1	1	1	1	1	1	1	1
412229	1	5	5	6	1	4	4	4	3	4	3	3	3	2	2	2	4	4	4	4	4	5	2	5	5	5	4	4	1	1	1	1	1	1	1	3	1	1	1	1	1	1	1	1	1	1	1	1	1
412907	3	4	1	6	1	4	1	1	1	1	1	1	1	1	1	1	4	4	4	5	5	5	5	5	5	5	2	2	1	1	1	1	1	1	1	1	1	1	1	1	1	1	1	1	1	1	1	1	1
414141	1	13	5	6	1	4	4	4	2	3	3	2	2	3	3	4	4	5	3	3	3	3	3	3	3	3	4	1	1	1	1	1	1	1	1	1	1	1	1	1	1	1	1	1	1	1	1	1	1
414752	2	11	1	7	1	4	4	2	2	2	1	1	1	1	1	1	5	5	5	5	5	5	5	5	5	5	1	1	1	1	1	1	1	1	1	3	1	1	1	1	1	1	1	1	1	1	1	1	1
414780	2	12	1	3	1	4	4	4	1	3	2	1	1	1	1	1	5	5	5	5	5	5	2	5	5	5	3	1	1	1	1	1	1	1	1	1	1	1	1	1	1	1	1	1	1	1	1	1	1
415092	5	2	2	3	1	4	3	3	1	3	3	1	1	3	1	3	5	5	5	5	5	5	5	5	5	5	4	1	1	1	1	1	1	1	1	1	1	1	1	1	1	1	1	1	1	1	1	1	1
416031	2	3	1	3	1	4	4	4	4	4	4	3	4	3	3	3	5	5	5	5	5	5	5	5	5	5	4	1	1	1	1	1	1	1	1	1	1	1	1	1	1	1	1	1	1	1	1	1	1
416320	2	12	1	5	1	4	5	5	2	5	3	3	3	3	3	3	3	5	5	3	3	5	5	5	5	5	2	1	1	1	1	1	1	1	1	1	1	1	1	1	1	1	1	1	1	1	1	1	1
416999	4	12	1	6	1	4	3	3	2	2	3	1	1	3	2	2	5	5	5	5	5	5	5	5	5	5	2	1	1	1	1	1	1	1	1	2	1	1	1	1	1	1	1	1	1	1	1	1	1
419198	1	1	2	6	1	4	3	2	1	2	2	1	1	1	3	3	5	5	5	5	5	5	5	5	5	5	5	1	1	1	1	1	1	1	1	2	1	1	1	1	1	1	1	1	1	1	1	1	1
419215	2	12	1	7	1	4	4	2	1	2	1	1	1	1	1	1	5	5	5	5	4	5	5	5	5	5	1	1	1	1	1	1	1	1	1	1	1	1	1	1	1	1	1	1	1	1	1	1	1
420709	2	5	5	3	1	4	1	1	1	1	1	1	1	1	1	1	5	5	5	5	5	5	5	5	5	5	1	1	1	1	1	1	1	1	1	5	1	1	1	1	1	1	1	1	1	1	1	1	1
422290	1	4	2	6	1	4	3	3	3	2	3	3	3	3	3	3	3	3	5	3	3	3	5	5	5	5	4	5	1	1	1	1	1	1	1	5	1	1	1	1	1	1	1	1	1	1	1	1	1
424612	2	12	1	2	1	4	4	3	2	2	2	2	2	2	2	2	4	5	5	5	4	5	5	5	5	5	1	4	1	1	1	1	1	1	1	1	1	1	1	1	1	1	1	1	1	1	1	1	1
425569	1	2	2	7	1	4	1	2	1	1	1	1	1	1	1	1	5	5	5	5	5	5	5	5	5	5	4	1	1	1	1	1	1	1	1	1	1	1	1	1	1	1	1	1	1	1	1	1	1
426016	2	2	1	9	1	4	4	5	1	3	4	1	1	1	1	3	5	5	5	5	3	5	3	5	5	5	3	2	1	1	1	1	1	1	1	5	1	1	1	1	1	1	1	1	1	1	1	1	1
426633	1	1	1	6	1	4	4	4	1	4	2	1	1	2	2	3	5	5	3	5	5	5	4	5	5	5	5	1	1	1	1	1	1	1	1	3	1	4	1	1	1	1	1	1	1	1	1	1	1
426636	6	5	1	2	1	4	4	4	3	3	4	2	2	2	2	3	4	5	5	5	5	5	5	5	5	5	4	1	1	1	1	1	1	1	1	1	1	1	1	1	1	1	1	1	1	1	1	1	1
426796	3	2	2	6	1	4	5	5	2	4	4	1	1	1	1	1	5	5	5	5	5	5	5	5	5	5	5	1	1	1	1	1	1	1	1	5	1	3	1	1	1	5	1	1	1	1	1	1	1
427595	1	2	2	5	1	4	3	3	1	3	3	1	1	3	3	3	5	5	5	5	5	4	2	4	4	5	4	2	1	1	1	1	1	1	1	1	1	1	1	1	1	1	1	1	1	1	1	1	1
429428	2	8	1	3	1	4	4	4	2	4	2	1	1	4	4	4	3	5	5	5	5	4	4	4	4	4	4	4	1	1	1	1	1	1	1	1	1	1	1	1	1	1	1	1	1	1	1	1	1
431367	2	4	1	7	1	4	4	3	2	2	2	1	1	1	1	2	4	5	4	4	5	5	5	5	5	5	4	1	1	1	1	1	1	1	1	5	1	1	1	2	5	2	1	1	1	1	1	1	1
431505	3	4	2	3	1	4	3	3	3	3	2	3	3	1	3	4	4	4	4	4	3	3	2	2	2	3	4	1	1	1	1	1	1	1	1	1	1	1	1	1	1	1	1	1	1	1	1	1	1
431953	3	8	5	4	1	4	4	5	2	3	2	1	1	1	1	1	5	4	5	5	5	5	5	5	5	5	4	1	1	1	1	1	1	1	1	1	1	1	1	1	1	1	1	1	1	1	1	1	1
432613	2	13	1	9	1	4	4	4	2	3	3	2	1	1	1	2	5	5	5	5	5	5	5	5	5	5	1	5	1	1	1	1	1	1	1	5	1	1	1	1	1	1	1	1	1	1	1	2	1
433287	1	7	5	9	1	4	4	4	1	3	4	1	1	3	3	3	4	4	3	4	5	5	5	5	5	5	2	4	1	1	1	1	1	1	1	1	1	1	1	1	1	1	1	1	1	1	1	1	1
433326	2	12	1	5	2	4	2	3	1	1	1	1	1	1	1	1	4	5	5	5	5	5	5	5	5	5	4	4	1	1	1	1	1	1	1	5	1	2	1	1	2	2	1	1	2	1	1	1	1
433489	2	12	1	6	1	4	4	4	1	4	3	2	1	2	1	3	5	5	3	4	5	5	2	3	3	4	2	1	1	1	1	1	1	1	1	3	1	1	1	1	1	1	1	1	1	1	1	1	1
435759	4	12	1	6	1	4	4	4	1	2	2	1	1	1	1	2	3	5	5	5	5	5	5	5	5	4	4	2	1	1	1	1	1	1	1	3	1	1	1	1	1	1	1	1	1	1	1	1	1
437117	2	5	1	7	1	4	4	4	2	3	4	2	2	1	1	3	5	5	5	5	5	5	5	5	5	5	4	1	1	1	1	1	1	1	1	3	1	1	1	1	1	1	1	1	1	1	1	1	1
437310	33	5	2	7	1	4	1	1	1	1	1	1	1	1	1	1	5	5	5	5	5	5	5	5	5	5	1	1	1	1	1	1	1	1	1	1	1	1	1	1	1	1	1	1	1	1	1	1	1
437672	3	12	1	7	1	4	4	4	2	2	2	1	1	3	3	3	4	5	5	5	5	5	5	5	5	5	2	1	1	1	1	1	1	1	1	1	1	1	1	1	1	1	1	1	1	1	1	1	1
438009	1	11	2	7	1	4	5	4	1	4	2	1	1	1	1	2	5	5	5	5	5	5	2	5	5	5	5	1	1	1	1	1	1	1	1	5	1	1	1	1	1	1	1	1	1	2	1	2	2
439720	1	5	2	2	1	4	5	4	2	5	4	2	1	4	1	3	5	5	5	5	5	5	5	5	5	5	2	1	1	1	1	1	1	1	1	1	1	1	1	1	1	1	1	1	1	1	1	1	1
440392	1	12	3	8	1	4	5	5	1	5	4	3	2	2	1	3	5	3	4	3	3	4	5	5	5	4	2	1	1	1	1	1	1	1	1	1	1	1	1	1	1	1	1	1	1	1	1	1	1
440406	1	8	2	2	1	4	2	2	1	2	1	1	1	1	1	2	5	5	5	5	5	5	5	5	5	5	1	1	1	1	1	1	1	1	1	5	1	1	1	1	1	1	1	1	1	5	1	1	1
440684	2	8	2	4	1	4	5	5	1	2	2	1	1	1	1	2	3	3	4	3	1	1	1	1	1	1	3	4	1	1	1	1	1	1	1	5	1	1	1	1	1	1	1	1	1	1	1	1	1
441313	2	12	1	6	1	4	5	5	2	4	4	2	2	3	1	2	4	5	5	5	4	5	5	5	5	5	4	1	1	1	1	1	1	1	1	1	1	1	1	1	1	1	1	1	1	1	1	1	1
441330	4	4	1	6	1	4	4	2	1	3	2	1	1	1	1	3	5	5	4	5	5	5	4	5	5	5	2	1	1	1	1	1	1	1	1	3	1	1	1	1	1	1	1	1	1	1	1	2	1
441643	2	12	1	7	1	4	4	4	1	4	4	1	1	3	3	3	5	5	5	5	5	5	5	5	5	5	4	1	1	1	1	1	1	1	1	1	1	1	1	1	1	1	1	1	1	1	1	1	1
441833	1	12	1	6	1	4	4	3	2	4	4	2	2	2	1	3	4	5	4	4	5	5	5	5	5	5	2	1	1	1	1	1	1	1	1	1	1	1	1	1	1	1	1	1	1	1	1	1	1
444956	1	4	2	9	1	4	2	2	1	2	2	1	1	3	3	4	4	5	4	4	4	5	3	4	4	4	4	1	1	1	1	1	1	1	1	2	1	1	1	1	1	1	1	1	1	1	1	1	1
447544	2	12	1	8	1	4	5	5	1	2	3	2	2	1	1	1	5	5	5	5	5	5	5	5	5	5	4	1	1	1	1	1	1	1	1	1	1	1	1	1	1	1	1	1	1	1	1	1	1
448710	3	13	1	7	1	4	4	5	2	4	3	2	2	2	1	1	5	5	5	5	5	5	5	5	5	5	5	1	1	1	1	1	1	1	1	3	1	1	1	1	1	1	1	1	1	1	1	1	1
449600	1	13	2	3	1	4	3	4	1	2	3	2	3	1	1	3	4	5	4	4	3	5	4	5	5	4	5	1	1	1	1	1	1	1	1	1	1	1	1	1	1	1	1	1	1	1	1	1	1
452415	2	12	1	3	1	4	4	4	2	3	3	1	1	2	2	2	5	5	5	5	5	5	5	5	5	5	5	5	1	1	1	1	1	1	1	3	1	1	1	1	1	1	1	1	1	1	1	1	1
452420	2	12	1	3	1	4	4	3	2	3	1	1	1	1	1	1	5	5	5	5	5	5	5	5	5	5	1	1	1	1	1	1	1	1	1	1	1	1	1	1	1	1	1	1	1	1	1	1	1
453186	2	7	1	7	1	4	3	3	2	3	2	2	2	1	2	4	4	3	3	4	4	4	4	4	4	4	5	2	1	1	1	1	1	1	1	3	1	1	1	1	1	1	1	1	1	1	1	1	1
454462	3	12	1	2	1	4	4	5	1	2	2	1	1	2	2	2	3	5	5	5	3	5	5	5	5	5	2	1	1	1	1	1	1	1	1	1	1	1	1	1	1	1	1	1	1	1	1	1	1
455616	4	13	1	5	1	4	5	4	3	5	1	1	1	1	1	1	5	5	5	5	5	5	5	5	5	5	1	1	1	1	1	1	1	1	1	1	1	1	1	1	1	1	1	1	1	1	1	1	1
456953	3	8	1	5	1	4	3	2	1	2	1	1	1	1	1	1	3	5	5	4	3	5	5	5	5	5	2	1	1	1	1	1	1	1	1	2	1	1	1	1	1	1	1	1	1	1	1	1	1
457444	2	5	2	3	1	4	3	3	3	3	3	3	3	3	3	3	5	5	5	5	5	5	5	5	5	5	4	1	1	1	1	1	1	1	1	5	1	2	1	2	1	1	1	1	1	1	1	1	1
460298	3	12	1	3	1	4	4	4	2	3	2	3	1	1	1	1	5	5	5	5	5	5	5	5	5	5	1	1	1	1	1	1	1	1	1	1	1	1	1	1	1	1	1	1	1	1	1	1	1
460425	1	11	5	9	1	4	3	3	3	3	3	3	3	3	3	3	5	5	5	5	5	5	5	5	5	5	4	5	5	5	5	5	5	5	5	2	1	1	1	1	1	1	1	1	1	1	1	1	1
462659	5	7	1	3	1	4	4	3	1	4	1	1	1	2	2	2	5	5	5	5	5	5	5	5	5	5	5	1	1	1	1	1	1	1	1	5	1	1	1	1	1	1	1	1	1	1	1	1	1
462680	3	8	5	4	1	4	5	5	5	5	5	5	5	2	1	2	3	3	3	4	4	4	4	4	4	4	2	2	1	1	1	1	1	1	1	3	1	1	1	1	1	1	1	1	1	1	1	1	1
462703	2	12	1	3	1	4	5	5	2	4	4	2	2	2	1	3	4	4	4	4	4	4	2	5	4	5	2	1	1	1	1	1	1	1	1	5	1	2	2	1	1	5	1	1	1	2	1	1	2
465547	3	11	1	9	1	4	4	3	2	3	3	2	2	3	3	4	5	5	5	4	4	5	5	5	5	5	2	1	1	1	1	1	1	1	1	3	1	1	1	1	1	1	1	1	1	1	1	1	1
466242	1	8	3	1	1	4	5	4	4	4	4	3	3	1	1	3	3	5	5	5	5	5	5	5	5	5	1	1	1	1	1	1	1	1	1	1	1	1	1	1	1	1	1	1	1	1	1	1	1
467453	3	13	2	1	1	4	3	3	3	3	3	3	3	3	3	3	5	5	5	5	5	5	5	5	5	5	1	1	1	1	1	1	1	1	1	1	1	1	1	1	1	1	1	1	1	1	1	1	1
467804	2	12	1	3	1	4	4	4	3	4	4	3	3	3	3	2	5	5	5	5	4	5	5	5	5	5	2	2	1	1	1	1	1	1	1	1	1	1	1	1	1	1	1	1	1	1	1	1	1
468440	3	4	1	8	1	4	3	2	2	3	3	1	1	1	1	4	5	5	5	5	5	4	4	5	4	3	4	1	1	1	1	1	1	1	1	4	1	3	4	1	1	1	1	1	1	1	1	1	1
468902	3	8	1	6	1	4	5	5	1	4	4	1	1	2	1	3	4	5	5	5	5	5	5	5	5	5	5	1	1	1	1	1	1	1	1	1	1	1	1	1	1	1	1	1	1	1	1	1	1
469545	4	4	1	7	1	4	5	3	3	5	3	3	2	1	1	1	3	5	4	3	3	4	2	5	2	3	4	5	1	1	1	1	1	1	1	3	1	1	1	1	2	1	1	1	1	1	1	1	1
469619	1	6	2	6	1	4	1	1	1	1	1	1	1	1	1	2	5	5	5	5	5	5	5	5	5	5	3	1	1	1	1	1	1	1	1	1	1	1	1	1	1	1	1	1	1	1	1	1	1
470158	3	2	1	7	1	4	3	3	3	2	2	3	4	3	3	3	2	2	3	2	3	2	3	2	2	2	2	1	2	1	2	1	1	1	1	1	1	1	1	1	1	1	1	1	1	1	1	1	1
470167	2	8	2	3	1	4	4	3	1	4	3	1	1	4	4	5	3	5	4	4	4	5	3	3	4	5	4	3	1	1	1	1	1	1	1	2	1	1	1	1	1	1	1	1	1	1	1	1	1
470200	3	12	1	3	1	4	5	5	3	5	3	3	3	1	1	2	4	3	5	4	3	4	4	4	4	4	1	1	1	1	1	1	1	1	1	1	1	1	1	1	1	1	1	1	1	1	1	1	1
470488	3	11	1	6	1	4	3	4	2	3	2	2	2	2	2	2	5	5	5	5	5	5	5	5	5	5	5	1	1	1	1	1	1	1	1	3	1	1	1	1	1	1	1	1	1	1	1	1	1
471624	8	12	2	6	1	4	3	2	1	2	1	1	1	1	1	3	5	5	5	5	5	5	5	5	5	5	2	1	1	1	1	1	1	1	1	1	1	1	1	1	1	1	1	1	1	1	1	1	1
471703	1	5	2	6	1	4	3	3	1	1	1	1	1	1	1	1	5	5	5	5	5	5	5	5	5	5	2	1	1	1	1	1	1	1	1	1	1	1	1	1	1	1	1	1	1	1	1	1	1
472216	4	4	1	5	1	4	4	4	2	2	4	1	1	1	1	1	5	5	5	5	5	5	5	5	5	5	4	1	1	1	1	1	1	1	1	3	1	2	1	1	1	5	2	1	1	1	1	1	1
473671	5	5	1	7	1	4	2	2	2	2	2	2	2	2	2	2	5	5	5	5	5	5	5	5	5	5	5	1	1	1	1	1	1	1	1	1	1	1	1	1	1	1	1	1	1	1	1	1	1
475026	2	2	1	7	1	4	4	4	1	1	1	1	1	1	1	1	5	5	5	5	5	5	5	5	5	5	2	1	1	1	1	1	1	1	1	1	1	1	1	1	1	1	1	1	1	1	1	1	1
475266	4	8	1	4	1	4	4	4	2	4	4	2	2	4	3	4	4	5	4	5	4	5	5	5	5	5	4	1	1	1	1	1	1	1	1	1	1	1	1	1	1	1	1	1	1	1	1	1	1
477427	2	12	1	6	1	4	4	4	2	3	3	2	2	3	1	3	3	4	3	3	3	4	1	4	4	5	4	3	1	1	1	1	1	1	1	1	1	1	1	1	1	1	1	1	1	1	1	1	1
478120	3	5	1	9	1	4	2	2	2	2	2	2	2	2	2	2	5	5	5	5	5	5	5	5	5	5	5	2	1	1	1	1	1	1	1	3	1	1	1	1	1	1	1	1	1	1	1	1	1
478386	67	12	1	3	1	4	2	4	1	3	3	2	2	1	1	1	5	5	5	5	5	5	5	5	5	5	1	1	1	1	1	1	1	1	1	1	1	1	1	1	1	1	1	1	1	1	1	1	1
478392	2	5	5	5	1	4	3	1	1	2	2	1	1	1	1	2	5	5	5	5	5	5	5	5	5	5	2	1	1	1	1	1	1	1	1	5	1	1	1	1	1	1	1	1	1	1	1	1	1
479420	1	5	2	9	1	4	3	3	2	3	2	2	2	2	3	2	5	5	5	5	5	5	5	5	5	5	4	1	1	1	1	1	1	1	1	2	1	1	1	1	1	1	1	1	1	1	1	1	1
481160	1	4	2	8	1	4	2	2	2	2	1	1	1	1	1	1	5	5	5	5	5	5	5	5	5	5	5	1	1	1	1	1	1	1	1	3	1	1	1	1	1	5	1	1	1	1	1	1	1
481845	4	5	2	7	1	4	4	4	2	4	4	2	2	2	2	3	4	4	4	4	4	4	4	5	5	5	2	1	1	1	1	1	1	1	1	1	1	1	1	1	1	1	1	1	1	1	1	1	1
481854	3	13	5	3	1	4	3	2	2	2	2	2	1	1	1	3	5	5	5	5	4	4	2	5	4	5	2	4	1	1	1	1	1	1	1	3	1	1	1	1	1	1	1	1	1	4	1	1	1
482318	2	12	1	6	1	4	3	4	3	4	3	4	2	2	2	2	4	5	5	5	5	5	5	5	5	5	1	1	1	1	1	1	1	1	1	1	1	1	1	1	1	1	1	1	1	1	1	1	1
482367	3	5	1	9	1	4	4	4	2	3	3	3	3	2	2	3	5	5	5	5	5	5	5	5	5	5	4	1	1	1	1	1	1	1	1	1	1	1	1	1	1	1	1	1	1	1	1	1	1
482395	5	8	1	6	1	4	4	5	1	4	5	2	4	2	2	2	4	4	3	3	3	5	5	5	5	4	4	1	1	1	1	1	1	1	1	1	1	1	1	1	1	1	1	1	1	1	1	1	1
482867	2	12	1	3	1	4	4	4	2	3	4	2	1	2	2	2	5	5	5	5	5	5	5	5	5	5	1	1	1	1	1	1	1	1	1	1	1	1	1	1	1	1	1	1	1	1	1	1	1
483149	2	12	1	5	1	4	4	4	2	4	3	2	2	1	1	2	4	5	5	5	5	5	5	5	5	5	4	1	1	1	1	1	1	1	1	1	1	1	1	1	1	1	1	1	1	1	1	1	1
484457	3	4	1	9	1	4	2	3	1	1	2	1	1	4	1	1	5	5	5	5	5	5	5	5	5	5	4	1	1	1	1	1	1	1	1	1	1	1	1	1	1	1	1	1	1	1	1	1	1
484485	4	4	1	7	1	4	2	5	1	2	3	1	3	1	1	2	4	5	3	3	2	5	5	5	5	5	5	2	1	1	1	1	1	1	1	3	1	1	1	1	1	1	1	1	1	1	1	1	1
484833	2	8	1	2	1	4	5	5	2	4	4	3	3	3	3	3	5	5	5	5	5	5	5	5	5	5	1	1	1	1	1	1	1	1	1	1	1	1	1	1	1	1	1	1	1	1	1	1	1
485648	5	7	2	3	1	4	1	1	1	1	1	1	1	1	1	1	5	5	5	5	5	5	2	5	5	5	4	1	1	1	1	1	1	1	1	5	1	1	1	1	1	1	1	1	1	1	1	2	5
485963	2	12	1	6	1	4	5	5	5	3	3	5	4	5	5	5	3	5	3	3	3	3	3	3	3	3	4	1	1	1	1	1	1	1	1	3	1	1	1	1	1	1	1	1	1	1	1	1	1
486209	2	5	1	7	1	4	3	2	1	1	2	1	1	1	1	4	3	5	3	3	4	4	2	3	3	4	2	1	1	1	1	1	1	1	1	2	1	1	1	1	1	1	1	1	1	1	1	1	1
487684	2	13	1	6	1	4	4	4	2	3	3	3	3	4	2	3	4	5	4	3	3	3	3	4	4	4	5	4	1	1	1	1	1	1	1	5	1	2	1	1	2	1	1	1	2	1	1	1	1
490219	1	5	5	6	1	4	3	3	3	3	1	1	1	4	1	4	5	5	5	5	5	5	5	5	5	5	2	1	1	1	1	1	1	1	1	1	1	1	1	1	1	1	1	1	1	1	1	1	1
491697	2	12	1	2	1	4	1	1	1	1	1	1	1	1	1	1	5	5	5	5	5	5	5	5	5	5	2	1	1	1	1	1	1	1	1	1	1	1	1	1	1	1	1	1	1	1	1	1	1
491874	2	13	5	5	1	4	5	5	1	5	4	1	1	1	1	1	4	4	4	4	4	4	4	4	4	4	1	4	1	1	1	1	1	1	1	3	1	1	1	1	1	1	1	1	1	4	1	1	1
493769	3	4	1	9	2	4	2	2	2	2	2	2	2	2	2	2	4	5	5	5	5	5	5	5	5	5	4	1	1	1	1	1	1	1	1	1	1	1	1	1	1	1	1	1	1	1	1	1	1
494171	3	5	1	7	1	4	1	1	1	1	1	1	1	1	1	1	4	4	4	4	5	5	5	5	5	5	4	1	1	1	1	1	1	1	1	1	1	1	1	1	1	1	1	1	1	1	1	1	1
494172	3	12	1	4	1	4	4	4	1	1	2	1	1	1	1	1	5	5	5	5	5	5	5	5	5	5	1	1	1	1	1	1	1	1	1	1	1	1	1	1	1	1	1	1	1	1	1	1	1
496010	3	12	1	5	1	4	4	3	2	2	3	1	1	2	1	3	5	5	5	5	5	5	5	5	5	5	2	1	1	1	1	1	1	1	1	1	1	1	1	1	1	1	1	1	1	1	1	1	1
496312	1	5	2	3	1	4	5	4	3	5	4	2	2	1	1	1	5	5	5	5	5	5	5	5	5	5	2	1	1	1	1	1	1	1	1	1	1	1	1	1	1	1	1	1	1	1	1	1	1
496554	3	9	2	6	1	4	4	4	3	3	3	3	2	2	2	2	2	2	3	3	3	2	1	1	1	1	3	5	1	1	1	1	1	1	1	1	1	1	1	1	1	1	1	1	1	1	1	1	1
496609	3	13	2	2	2	4	4	4	3	4	3	1	2	2	2	2	5	5	5	5	5	5	5	5	5	5	5	5	1	1	1	1	1	1	1	1	1	1	1	1	1	1	1	1	1	1	1	1	1
497241	1	8	5	2	1	4	4	4	1	4	4	1	1	1	1	4	5	5	5	5	5	5	5	5	5	5	1	1	1	1	1	1	1	1	1	3	1	1	1	1	1	1	1	1	1	1	1	1	1
497858	1	8	2	3	1	4	2	2	1	2	2	1	1	1	1	3	4	4	4	4	4	2	1	4	1	4	3	1	1	1	1	1	1	1	1	2	1	1	1	1	1	1	1	1	1	1	1	1	1
498226	1	6	2	4	1	4	4	2	1	4	2	1	1	3	3	3	5	5	5	5	5	5	5	5	5	5	2	1	1	1	1	1	1	1	1	5	1	5	1	1	1	1	1	1	1	1	1	1	1
498278	1	5	2	2	1	4	1	1	3	3	3	3	3	3	3	3	5	1	5	5	5	5	5	5	5	5	1	1	1	1	1	1	1	1	1	5	1	1	1	1	1	1	1	1	1	1	1	1	1
498906	1	4	2	6	1	4	5	5	5	5	5	5	4	5	4	4	3	3	3	3	3	3	3	3	3	5	1	1	1	1	1	1	1	1	1	1	1	1	1	1	1	1	1	1	1	1	1	1	1
500014	2	11	1	9	1	4	3	3	3	3	3	3	3	1	2	2	5	5	5	5	5	5	5	5	5	5	5	1	1	1	1	1	1	1	1	3	1	1	1	1	1	1	1	1	1	1	1	1	1
500530	3	5	2	3	1	4	5	5	5	5	5	3	2	2	3	5	4	2	1	2	4	4	4	4	4	4	3	4	1	1	1	1	1	1	1	5	1	1	1	1	1	1	1	1	1	1	1	1	1
502939	4	8	1	6	1	4	4	3	1	2	3	1	1	2	1	2	5	5	5	5	5	5	5	5	5	5	2	1	1	1	1	1	1	1	1	1	1	1	1	1	1	1	1	1	1	1	1	1	1
503832	1	13	2	3	1	4	3	2	2	2	3	2	2	2	2	2	5	5	5	5	5	5	3	4	5	5	2	1	1	1	1	1	1	1	1	1	1	1	1	1	1	1	1	1	1	1	1	1	1
504520	2	5	2	6	1	4	2	2	2	2	2	1	1	1	1	1	5	5	5	5	5	5	5	5	5	5	5	1	1	1	1	1	1	1	1	1	1	1	1	1	1	1	1	1	1	1	1	1	1
504845	3	2	1	6	1	4	5	5	1	3	4	3	1	1	1	3	1	3	3	2	2	3	1	1	1	1	4	1	1	1	1	1	1	1	1	1	1	1	1	1	1	1	1	1	1	1	1	1	1
505672	3	3	2	2	1	4	4	3	1	3	3	1	1	2	1	4	5	5	5	5	5	5	5	5	5	5	2	1	1	1	1	1	1	1	1	3	1	1	1	1	1	1	1	1	1	1	1	1	1
505923	3	12	1	3	1	4	4	4	1	3	3	1	1	3	3	4	5	5	5	5	5	5	5	5	5	5	4	1	1	1	1	1	1	1	1	1	1	1	1	1	1	1	1	1	1	1	1	1	1
508350	1	5	2	3	1	4	2	2	2	1	2	1	1	2	2	2	5	4	5	5	1	5	2	5	5	5	4	1	1	1	1	1	1	1	1	3	1	1	1	1	1	1	1	1	1	1	1	1	2
509189	1	6	2	5	1	4	5	5	1	5	1	1	1	1	1	1	4	5	5	5	4	2	4	4	4	5	5	1	1	1	1	1	1	1	1	1	1	1	1	1	1	1	1	1	1	1	1	1	1
509277	1	8	5	6	1	4	5	5	1	1	1	1	1	1	1	1	5	5	5	5	5	5	5	5	5	5	5	1	1	1	1	1	1	1	1	1	1	1	1	1	1	1	1	1	1	1	1	1	1
510062	2	7	1	7	1	4	3	4	1	2	3	1	1	2	1	2	4	5	5	4	5	5	5	5	5	3	4	1	1	1	1	1	1	1	1	1	1	1	1	1	1	1	1	1	1	1	1	1	1
510620	2	5	1	9	1	4	4	4	2	4	3	2	2	2	2	2	5	5	4	5	5	5	5	5	5	2	4	1	1	1	1	1	1	1	1	3	1	1	1	1	1	1	1	1	1	1	1	1	1
510636	2	6	1	3	1	4	5	4	1	2	5	2	1	1	1	2	3	3	5	5	5	5	4	5	5	5	1	1	1	1	1	1	1	1	1	1	1	1	1	1	1	1	1	1	1	1	1	1	1
510989	2	2	2	3	2	4	4	3	2	4	3	2	2	2	3	3	5	5	5	5	4	4	2	4	2	5	5	2	1	1	1	2	1	1	1	3	1	1	1	1	1	1	1	1	2	2	2	2	1
513813	2	13	5	5	1	4	3	3	1	2	3	1	1	1	1	3	4	5	5	4	4	5	2	5	4	5	2	1	1	1	1	1	1	1	1	5	1	3	1	1	1	2	1	1	1	3	1	1	1
514636	2	12	1	5	1	4	5	4	2	4	3	3	3	1	1	2	4	5	5	5	4	5	5	5	5	5	1	4	1	1	1	1	1	1	1	1	1	1	1	1	1	1	1	1	1	1	1	1	1
515263	2	13	1	3	1	4	1	1	1	1	1	1	1	1	1	1	3	5	5	4	1	5	1	5	1	5	5	1	1	1	1	1	1	1	1	5	1	1	1	1	1	1	1	1	2	2	2	1	1
515450	2	13	2	6	1	4	5	4	2	5	4	1	1	2	1	3	4	5	4	4	4	4	4	3	4	5	2	5	1	1	1	1	1	1	1	1	1	1	1	1	1	1	1	1	1	1	1	1	1
515491	3	12	1	3	1	4	5	5	1	4	4	1	1	1	1	1	4	3	1	4	4	4	2	2	2	3	1	1	1	1	1	1	1	1	1	3	1	1	1	1	1	1	1	1	1	1	1	1	1
516219	1	5	2	9	1	4	2	3	1	2	2	2	1	3	2	3	4	5	4	5	4	4	4	5	5	4	5	1	1	1	1	1	1	1	1	3	1	1	1	1	1	1	1	1	1	1	1	1	1
516700	2	1	2	4	1	4	5	4	1	4	4	1	1	4	2	3	4	5	5	5	5	5	4	4	4	5	4	2	1	1	1	1	1	1	1	3	1	2	2	2	5	2	1	1	1	2	1	2	4
517306	1	2	5	6	1	4	4	3	1	1	2	3	1	1	1	1	5	5	5	5	5	5	5	5	5	5	5	1	1	1	1	1	1	1	1	5	1	1	1	1	1	1	1	1	1	1	1	1	1
518459	4	13	2	7	1	4	2	2	1	2	2	1	1	2	3	3	5	5	5	5	5	5	3	4	5	5	2	1	1	1	1	1	1	1	1	1	1	1	1	1	1	1	1	1	1	1	1	1	1
518491	3	12	1	5	1	4	3	3	1	4	1	1	1	2	2	3	5	5	5	5	5	5	5	5	5	5	4	1	1	1	1	1	1	1	1	1	1	1	1	1	1	1	1	1	1	1	1	1	1
518763	2	11	1	3	1	4	5	5	4	5	5	2	2	2	2	2	5	5	5	5	5	5	5	5	5	5	5	1	1	1	1	1	1	1	1	3	1	1	1	1	1	1	1	1	1	1	1	1	1
519337	3	3	1	6	1	4	4	4	1	2	4	2	2	1	1	3	5	5	5	5	4	5	5	5	5	5	4	1	1	1	1	1	1	1	1	1	1	1	1	1	1	1	1	1	1	1	1	1	1
519496	1	4	2	3	1	4	5	4	1	3	3	2	2	1	1	3	5	5	5	5	5	5	5	5	5	5	2	1	1	1	1	1	1	1	1	1	1	1	1	1	1	1	1	1	1	1	1	1	1
520205	3	12	1	4	1	4	4	4	1	3	3	1	1	3	4	2	5	5	4	5	5	5	3	4	4	5	5	2	1	1	1	1	1	1	1	3	1	1	1	1	3	5	1	1	2	2	1	1	1
520270	2	12	1	4	1	4	4	3	3	3	3	2	2	2	2	4	5	5	5	5	4	5	3	5	5	5	5	1	1	1	1	1	1	1	1	3	1	1	1	1	1	1	1	1	1	1	1	1	1
520355	1	2	5	3	1	4	5	3	1	4	3	2	1	1	1	3	5	5	5	5	5	5	5	5	5	5	2	1	1	1	1	1	1	1	1	2	1	2	2	1	2	4	1	2	1	2	1	1	5
520927	3	4	1	3	1	4	5	4	3	2	2	2	1	1	1	1	5	5	5	5	5	5	4	4	4	5	5	2	1	1	1	1	1	1	1	2	2	1	1	1	1	1	1	1	1	1	1	1	1
521516	3	4	2	6	1	4	4	5	1	1	4	1	1	1	1	2	5	5	5	5	5	5	5	5	5	5	4	1	1	1	1	1	1	1	1	3	1	1	1	1	1	1	1	1	1	1	1	1	1
522657	2	12	1	5	1	4	4	4	1	2	2	1	1	1	1	3	5	5	5	5	5	5	5	5	5	5	2	1	1	1	1	1	1	1	1	2	1	1	1	1	1	1	1	1	1	1	1	1	1
525480	5	8	1	3	1	4	5	5	5	5	5	5	5	5	5	5	5	5	5	5	5	5	5	5	5	5	1	1	1	1	1	1	1	1	1	1	1	1	1	1	1	1	1	1	1	1	1	1	1
525990	1	8	2	2	1	4	4	4	4	4	4	4	4	2	5	4	2	2	2	1	2	3	2	3	2	2	1	5	1	1	1	1	1	1	1	5	1	1	1	1	1	1	1	1	1	1	1	1	1
526390	1	5	2	3	1	4	5	4	3	5	4	3	2	1	1	3	4	5	5	4	4	5	3	4	4	4	1	3	1	1	1	1	1	1	1	1	1	1	1	1	1	1	1	1	1	1	1	1	1
527303	4	1	2	6	1	4	4	4	4	3	3	1	1	1	1	1	4	4	4	4	4	4	4	4	4	4	1	1	2	1	1	1	1	1	1	1	1	1	1	1	1	1	1	1	1	1	1	1	1
528088	1	13	2	6	1	4	5	5	3	5	5	4	4	1	1	3	3	3	4	3	3	5	5	5	5	5	2	1	1	1	1	1	1	1	1	1	1	1	1	1	1	1	1	1	1	1	1	1	1
529304	5	4	1	9	1	4	4	4	1	2	1	1	1	3	3	3	5	5	5	5	5	5	5	5	5	5	4	1	1	1	1	1	1	1	1	1	1	1	1	1	1	1	1	1	1	1	1	1	1
529406	5	5	1	9	1	4	1	1	1	1	1	1	1	1	1	1	5	5	5	5	5	5	5	5	5	5	5	1	1	1	1	1	1	1	1	1	1	1	1	1	1	1	1	1	1	1	1	1	1
529531	1	4	2	7	1	4	2	4	1	1	1	1	1	1	1	1	5	5	5	5	5	5	5	5	5	5	5	1	1	1	1	1	1	1	1	1	1	1	1	1	1	1	1	1	1	1	1	1	1
529755	3	12	1	3	1	4	3	5	1	3	4	2	2	3	3	4	4	5	4	4	5	5	4	5	5	5	2	2	2	2	1	1	1	1	1	1	1	1	1	1	1	1	1	1	1	1	1	1	1
530584	3	12	1	6	1	4	5	4	2	4	4	3	2	2	2	3	5	5	5	5	5	5	5	5	5	5	4	1	1	1	1	1	1	1	1	1	1	1	1	1	1	1	1	1	1	1	1	1	1
531432	2	12	1	6	1	4	4	3	2	2	1	1	1	1	1	1	5	5	5	5	5	5	5	5	5	5	4	2	1	1	1	1	1	1	1	3	1	1	1	1	1	1	1	1	1	1	1	1	1
531453	2	8	1	3	1	4	4	3	1	4	2	1	1	3	3	4	5	4	5	5	5	5	4	5	5	5	4	1	1	1	1	1	1	1	1	1	1	1	1	1	1	1	1	1	1	1	1	1	1
531462	2	12	1	2	1	4	4	3	3	4	5	3	3	4	3	3	3	4	4	4	4	4	4	4	4	4	2	5	1	1	1	1	1	1	1	5	1	1	1	1	1	1	1	1	1	1	1	1	1
533739	2	5	2	5	1	4	5	4	2	4	4	3	2	1	1	1	4	4	4	4	5	5	3	3	3	3	2	2	1	1	1	1	1	1	1	2	1	1	1	1	1	1	1	1	1	1	1	1	1
534830	1	5	2	3	1	4	3	4	1	1	4	1	1	1	1	1	4	4	4	4	4	3	2	3	3	2	4	1	1	1	1	1	1	1	1	5	1	1	1	1	1	1	1	1	1	1	1	1	1
536073	2	2	1	6	1	4	3	4	1	2	2	1	1	1	1	3	5	5	5	4	4	5	5	5	5	5	2	1	1	1	1	1	1	1	1	3	1	1	1	1	1	1	1	1	1	1	1	1	1
537592	2	5	5	1	1	4	5	5	3	4	3	1	1	1	1	1	5	5	5	5	5	5	5	5	5	5	5	1	1	1	1	1	1	1	1	5	2	1	1	1	2	1	1	1	1	1	1	2	1
537746	2	7	1	4	1	4	4	4	3	3	3	3	3	1	1	2	4	5	3	4	4	4	3	4	4	5	5	2	1	1	1	1	1	1	1	3	1	1	1	1	1	1	1	1	1	1	1	2	1
537787	3	4	2	6	1	4	4	3	4	3	2	2	2	1	1	2	5	5	5	5	5	5	5	5	5	5	2	2	1	1	1	1	1	1	1	1	1	1	1	1	1	1	1	1	1	1	1	1	1
537813	3	5	1	7	1	4	3	3	3	3	3	3	3	3	3	3	5	5	5	5	5	5	5	5	5	5	4	1	1	1	1	1	1	1	1	5	1	2	1	1	1	4	4	1	2	2	1	1	5
538013	3	8	1	3	1	4	3	3	1	4	2	2	2	2	2	2	5	5	5	5	5	5	5	5	5	5	4	1	1	1	1	1	1	1	1	1	1	1	1	1	1	1	1	1	1	1	1	1	1
539312	3	5	2	7	1	4	3	4	2	3	3	1	1	1	1	2	5	4	4	5	4	4	1	2	2	5	1	1	1	1	1	1	1	1	1	3	1	1	1	1	1	1	1	1	1	1	1	1	1
540268	3	8	2	3	1	4	4	4	1	3	3	1	1	1	1	2	5	5	5	5	5	5	4	5	5	5	2	2	1	1	1	1	1	1	1	3	1	1	1	1	1	1	1	1	2	1	1	1	1
540304	2	13	1	6	1	4	4	4	2	3	3	2	1	5	4	4	5	5	4	4	4	3	3	3	4	4	4	5	1	2	1	1	1	1	1	3	1	1	1	1	1	1	1	1	1	1	1	2	1
540570	1	13	5	5	1	4	5	3	1	2	2	1	1	1	1	3	5	4	5	4	5	5	3	5	5	5	2	1	1	1	1	1	1	1	1	3	1	1	1	1	1	1	1	1	1	1	1	1	1
541287	3	13	2	7	1	4	3	1	1	2	2	1	1	1	1	2	5	4	5	4	5	3	4	5	5	5	2	1	1	1	1	1	1	1	1	1	1	1	1	1	1	1	1	1	1	1	1	1	1
541366	2	5	1	4	1	4	4	4	2	2	2	1	1	2	2	2	5	5	5	4	4	5	5	5	5	5	1	1	1	1	1	1	1	1	1	1	1	1	1	1	1	1	1	1	1	1	1	1	1
543119	2	11	1	3	1	4	5	4	1	3	1	1	1	1	1	1	4	5	5	5	5	5	5	5	5	5	3	1	1	1	1	1	1	1	1	3	1	1	1	1	1	1	1	1	1	1	1	2	1
544205	2	4	1	5	1	4	5	5	5	5	5	5	5	5	5	5	3	3	3	3	3	3	3	3	3	3	4	1	1	1	1	1	1	1	1	1	1	1	1	1	1	1	1	1	1	1	1	1	1
544275	1	2	5	6	1	4	3	3	1	3	3	1	1	3	3	4	5	5	5	5	5	5	5	5	5	5	2	1	1	1	1	1	1	1	1	1	1	1	1	1	1	1	1	1	1	1	1	1	1
544461	1	5	5	6	1	4	4	4	1	1	3	1	1	1	1	1	5	5	5	5	5	5	5	5	5	5	4	1	1	1	1	1	1	1	1	3	1	1	1	1	1	1	1	1	1	1	1	1	1
544838	2	8	1	2	1	4	4	4	1	4	4	1	1	1	1	2	5	5	5	5	5	5	5	5	5	5	4	1	1	1	1	1	1	1	1	1	1	1	1	1	1	1	1	1	1	1	1	1	1
544982	2	6	2	7	1	4	4	3	1	3	2	1	1	1	1	1	5	5	5	5	5	3	1	5	5	5	4	1	1	1	1	1	1	1	1	1	1	1	1	1	1	1	1	1	1	1	1	1	1
547300	3	13	1	3	1	4	4	4	3	3	3	2	3	3	3	3	5	5	5	5	5	5	5	5	5	5	5	1	1	1	1	1	1	1	1	3	3	1	1	1	1	1	1	1	1	1	1	2	1
547553	3	13	5	3	1	4	5	4	2	5	4	2	2	3	1	2	3	5	4	4	4	5	1	5	5	5	2	1	1	1	1	1	1	1	1	1	1	1	1	1	1	1	1	1	1	1	1	1	1
547591	1	13	2	5	1	4	3	3	1	3	2	1	1	1	1	1	3	1	3	1	1	1	1	1	1	3	4	1	1	1	1	1	1	1	1	1	1	1	1	1	1	1	1	1	1	1	1	1	1
549218	2	12	1	3	1	4	4	5	3	3	3	3	3	3	3	3	5	5	5	5	5	5	5	5	5	5	2	1	1	1	1	1	1	1	1	1	1	1	1	1	1	1	1	1	1	1	1	1	1
551471	3	2	2	9	1	4	5	4	1	5	4	1	1	3	2	2	5	4	4	5	5	5	5	5	5	5	3	3	1	1	1	1	1	1	1	3	1	1	1	1	1	1	1	1	1	1	1	2	1
552049	2	4	2	7	1	4	3	4	3	3	2	2	2	1	2	2	5	5	5	5	5	5	5	5	5	4	4	1	1	1	1	1	1	1	1	1	1	1	1	1	1	1	1	1	1	1	1	1	1
552320	2	12	1	3	1	4	5	5	2	1	3	1	1	1	1	3	5	5	5	4	4	5	2	5	5	5	4	1	1	1	1	1	1	1	1	1	1	1	1	1	1	1	1	1	1	1	1	1	1
552657	2	13	1	3	1	4	3	2	2	2	4	1	1	1	1	2	5	5	5	5	5	5	4	5	5	5	1	1	1	1	1	1	1	1	1	1	1	1	1	1	1	1	1	1	1	1	1	1	1
552911	2	13	1	6	1	4	4	4	1	3	3	1	1	1	1	2	4	5	5	4	4	4	3	5	5	4	5	1	1	1	1	1	1	1	1	3	1	1	1	1	1	1	1	1	1	1	1	1	1
553504	2	12	1	6	1	4	4	3	1	3	1	1	1	1	1	2	5	5	5	5	5	5	5	5	5	5	4	1	1	1	1	1	1	1	1	1	1	1	1	1	1	1	1	1	1	1	1	1	1
553958	2	12	1	3	1	4	4	4	2	5	4	2	3	1	1	4	4	4	5	4	5	3	2	2	2	1	2	1	1	1	1	1	1	1	1	3	1	1	1	1	1	1	1	1	1	1	3	1	1
554378	2	13	1	3	1	4	3	2	1	3	3	1	1	2	2	2	5	5	5	5	5	5	5	5	5	5	4	2	1	1	1	1	1	1	1	3	1	5	1	1	1	1	1	1	1	2	1	2	1
555603	3	12	1	6	1	4	2	2	1	1	1	1	1	1	1	1	5	5	5	5	5	5	5	5	5	5	5	1	1	1	1	1	1	1	1	1	1	1	1	1	1	1	1	1	1	1	1	1	1
556718	2	5	1	6	2	4	4	3	2	4	3	1	1	1	1	1	4	5	5	5	5	5	5	5	5	5	1	1	1	1	1	1	1	1	1	2	1	1	1	1	1	1	1	1	2	2	2	1	1
556809	2	2	1	6	1	4	4	3	2	3	3	2	2	3	2	3	3	4	4	4	4	4	4	4	4	4	4	1	1	1	1	1	1	1	1	5	1	1	1	1	1	1	1	1	1	1	1	1	1
559145	4	5	2	6	1	4	4	4	1	3	3	2	1	1	1	2	5	5	5	5	5	5	5	5	5	5	4	1	1	1	1	1	1	1	1	4	1	1	1	1	1	1	1	1	1	1	1	1	1
561951	2	8	2	6	1	4	4	4	2	4	4	2	3	1	1	2	4	5	4	4	4	4	3	3	3	3	1	1	1	1	1	1	1	1	1	1	1	1	1	1	1	1	1	1	1	1	1	1	1
562634	3	12	1	2	1	4	4	4	2	4	4	3	3	2	2	2	4	4	4	4	5	5	3	5	5	5	1	1	1	1	1	1	1	1	1	1	1	1	1	1	1	1	1	1	1	1	1	1	1
562665	2	11	1	6	1	4	4	3	2	3	3	2	3	2	1	2	4	5	5	4	5	5	5	5	5	5	2	1	1	1	1	1	1	1	1	1	1	1	1	1	1	1	1	1	1	1	1	1	1
564328	3	12	1	2	1	4	5	5	5	5	5	5	5	1	1	1	2	5	2	2	3	2	2	2	2	2	1	1	1	1	1	1	1	1	1	5	1	1	4	1	1	1	1	1	1	1	1	1	1
565333	2	11	1	6	1	4	4	2	1	2	2	1	1	2	3	2	5	5	5	5	5	5	5	5	5	5	4	3	1	1	1	1	1	1	1	3	1	1	1	1	1	1	1	1	1	1	1	2	1
565422	5	5	1	9	1	4	3	3	3	3	3	3	3	3	3	4	5	5	5	5	5	5	5	5	5	5	5	1	1	1	1	1	1	1	1	1	1	1	1	1	1	1	1	1	1	1	1	1	1
565472	2	12	1	3	1	4	5	5	5	5	5	4	4	2	2	4	3	3	3	3	3	3	3	3	3	3	4	1	1	1	1	1	1	1	1	1	1	1	1	1	1	1	1	1	1	1	1	1	1
565902	1	5	2	3	1	4	2	2	2	1	1	1	1	2	2	1	3	4	4	3	3	4	2	4	4	4	2	1	1	1	1	1	1	1	1	1	1	1	1	1	1	1	1	1	1	1	1	1	1
565986	4	4	1	6	1	4	3	2	2	3	2	1	1	1	1	2	5	5	5	5	5	5	5	5	5	5	4	5	1	1	1	1	1	1	1	3	1	1	1	1	1	1	1	1	1	1	1	1	1
566730	3	11	2	2	1	4	5	5	2	4	2	2	2	1	1	2	5	5	5	5	5	5	5	5	5	5	2	1	1	1	1	1	1	1	1	3	1	1	1	1	1	1	1	1	1	1	1	1	1
568470	2	13	2	6	1	4	3	3	2	2	2	1	1	2	2	2	4	4	4	4	5	5	2	2	2	4	2	2	1	1	1	1	1	1	1	1	1	1	1	1	1	1	1	1	1	1	1	1	1
568775	3	13	1	9	1	4	1	1	1	1	1	1	1	1	1	1	5	5	5	5	5	5	5	5	5	5	1	1	1	1	1	1	1	1	1	5	1	1	1	1	1	1	1	1	1	1	1	1	1
570030	4	5	5	4	1	4	5	5	1	2	5	2	1	1	1	1	5	5	4	4	4	4	4	4	5	5	1	1	1	1	1	1	1	1	1	1	1	1	1	1	1	1	1	1	1	1	1	1	1
570471	2	12	1	3	1	4	4	4	2	3	4	2	1	3	2	3	4	5	5	4	5	5	4	5	5	4	2	2	1	1	1	1	1	1	1	2	1	1	1	1	1	1	1	1	1	1	1	1	1
571910	3	5	5	8	1	4	3	3	1	1	2	1	1	1	1	1	5	5	5	5	5	5	5	5	5	5	2	1	1	1	1	1	1	1	1	1	1	1	1	1	1	1	1	1	1	1	1	1	1
572026	2	5	1	5	2	4	3	3	3	3	2	2	2	1	1	3	5	5	5	5	5	5	5	5	5	5	4	1	1	1	1	1	1	1	1	3	1	1	1	1	1	1	1	1	1	1	1	1	1
572179	4	7	1	6	1	4	4	4	1	2	2	1	1	2	3	3	5	5	5	5	5	5	3	3	3	4	4	2	1	1	1	1	1	1	1	3	1	1	1	1	1	1	1	1	1	1	1	1	1
572694	1	13	5	7	1	4	4	3	1	4	1	1	1	1	1	3	5	4	5	5	5	4	4	5	5	5	4	5	1	1	1	1	1	1	1	3	3	1	1	1	2	1	1	1	1	1	1	2	2
572759	3	5	1	2	1	4	5	5	5	5	5	5	5	5	5	5	5	5	5	5	5	5	5	5	5	5	1	1	1	1	1	1	1	1	1	1	1	1	1	1	1	1	1	1	1	1	1	1	1
576162	3	1	1	7	1	4	4	4	4	3	3	3	3	3	3	3	3	3	4	4	5	5	5	5	5	5	4	1	1	1	1	1	1	1	1	1	1	1	1	1	1	1	1	1	1	1	1	1	1
576356	3	13	2	4	1	4	4	3	1	3	3	1	1	1	1	3	5	4	5	5	5	3	3	3	3	5	2	1	1	1	1	1	1	1	1	3	1	1	1	1	1	1	1	1	1	1	1	1	1
576396	2	5	2	6	1	4	3	2	1	1	1	1	1	1	1	1	4	5	5	4	5	5	5	5	5	5	4	1	1	1	1	1	1	1	1	3	1	1	1	1	5	1	1	1	1	1	1	1	1
576771	3	13	5	7	1	4	1	4	1	1	1	1	1	1	2	3	5	5	5	5	5	5	4	5	5	5	5	1	1	1	1	1	1	1	1	3	1	1	1	1	1	1	1	1	1	1	1	2	1
577282	1	5	2	6	1	4	4	3	3	2	2	2	2	2	2	2	5	5	5	5	5	5	5	5	5	5	5	5	5	5	5	5	5	5	5	5	5	5	5	5	5	5	5	5	5	5	5	5	5
580509	2	4	1	9	1	4	3	3	2	2	2	1	1	1	1	3	5	5	5	5	5	5	5	5	5	5	2	1	1	1	1	1	1	1	1	3	1	1	1	1	1	1	1	1	1	1	1	1	1
581502	3	12	1	5	1	4	4	4	2	3	4	2	2	2	2	2	4	5	4	4	4	3	2	4	4	5	5	3	1	1	1	1	1	1	1	1	1	1	1	1	1	1	1	1	1	1	1	1	1
582573	3	12	1	3	1	4	4	4	3	4	4	2	3	1	1	1	4	5	5	4	5	5	5	5	5	5	2	5	1	1	1	1	1	1	1	1	1	1	1	1	1	1	1	1	1	1	1	1	1
584095	2	5	1	4	1	4	3	2	2	4	3	1	1	1	1	4	4	4	3	3	4	5	5	5	5	5	4	1	1	1	1	1	1	1	1	3	1	1	1	1	1	1	1	1	1	1	1	2	2
584189	2	12	1	3	1	4	5	4	4	4	4	3	2	3	3	4	4	5	5	5	4	4	5	5	5	4	4	1	1	1	1	1	1	1	1	1	1	1	1	1	1	1	1	1	1	1	1	1	1
584489	3	4	1	3	1	4	5	5	5	5	5	5	5	5	5	5	5	5	5	5	5	5	5	5	5	5	5	1	1	1	1	1	1	1	1	5	1	5	1	1	1	1	1	1	1	1	1	1	1
584578	5	5	5	5	1	4	4	4	2	2	4	2	3	1	1	3	4	5	3	4	5	5	5	5	5	5	2	2	1	1	1	1	1	1	1	1	1	1	1	1	1	1	1	1	1	1	1	1	1
585431	5	4	1	6	1	4	4	3	3	3	3	3	3	3	3	3	4	5	5	5	5	5	5	3	5	5	5	1	1	1	1	1	1	1	1	4	1	1	1	1	1	1	1	1	1	1	1	1	1
585734	1	13	2	1	1	4	4	2	1	1	1	1	1	1	1	1	5	5	5	5	5	5	4	5	5	5	3	1	1	1	1	1	1	1	1	3	1	1	1	1	1	1	1	1	1	1	1	1	1
586784	3	12	1	4	1	4	5	5	2	4	2	1	1	1	1	1	3	4	4	4	5	5	5	5	5	5	2	2	1	1	1	1	1	1	1	1	1	1	1	1	1	1	1	1	1	1	1	1	1
586792	3	8	2	3	1	4	4	2	1	1	1	1	1	1	1	3	5	5	5	5	5	5	5	5	5	5	4	1	1	1	1	1	1	1	1	3	1	1	1	1	1	1	1	1	1	1	1	1	1
588757	3	7	1	4	1	4	5	3	3	4	4	1	1	2	1	2	5	5	5	5	5	5	5	5	5	5	2	1	1	1	1	1	1	1	1	1	1	1	1	1	1	1	1	1	1	1	1	1	1
588992	1	5	5	6	1	4	4	4	1	1	1	1	1	2	1	2	5	5	5	5	5	5	5	5	5	5	3	2	1	1	1	1	1	1	1	1	1	1	1	1	1	1	1	1	1	1	1	1	1
589394	3	12	1	3	1	4	2	2	1	1	1	1	1	1	1	2	5	5	5	5	5	5	5	5	5	5	4	1	1	1	1	1	1	1	1	3	1	1	1	1	1	1	1	1	1	1	1	1	1
590308	3	5	1	2	1	4	5	5	3	4	4	3	3	1	1	4	5	5	5	5	5	5	5	5	5	5	4	1	1	1	1	1	1	1	1	1	1	1	1	1	1	1	1	1	1	1	1	1	1
590763	3	8	1	4	1	4	4	2	1	4	3	1	1	1	1	1	4	4	5	5	5	5	5	5	5	4	4	1	1	1	1	1	1	1	1	1	1	1	1	1	1	1	1	1	1	1	1	1	1
591504	2	12	1	3	1	4	3	4	3	4	3	3	3	1	1	3	5	5	5	5	5	5	5	5	5	5	4	1	1	1	1	1	1	1	1	1	1	1	1	1	1	1	1	1	1	1	1	1	1
591587	1	4	2	6	1	4	3	3	3	3	3	3	3	3	3	3	3	5	4	3	3	4	4	4	4	5	5	1	1	1	1	1	1	1	1	1	1	1	1	1	1	1	1	1	1	1	1	1	1
593097	2	1	1	3	1	4	4	4	1	4	1	1	1	4	1	2	4	4	5	4	4	4	2	5	5	5	2	1	1	1	1	1	1	1	1	5	1	1	1	1	1	1	1	1	1	1	1	1	1
593590	4	13	2	3	1	4	5	5	3	5	4	2	2	4	4	4	3	5	5	5	5	5	5	5	5	5	3	1	1	1	1	1	1	1	1	1	1	1	1	1	1	1	1	1	1	1	1	1	1
594552	3	12	1	6	1	4	5	4	4	4	4	4	4	2	2	2	4	5	4	3	3	3	4	4	4	5	4	1	1	1	1	1	1	1	1	1	1	1	1	1	1	1	1	1	1	1	1	1	1
597622	2	13	1	3	1	4	4	4	3	3	3	1	1	1	1	2	5	5	5	5	4	5	5	5	5	5	4	1	1	1	1	1	1	1	1	1	1	1	1	1	1	1	1	1	1	1	1	1	1
598196	3	12	1	7	1	4	1	1	1	1	1	1	1	1	1	1	5	5	5	5	5	5	5	5	5	5	1	1	1	1	1	1	1	1	1	1	1	1	1	1	1	1	1	1	1	1	1	1	1
599185	3	13	1	3	1	4	4	3	3	3	3	3	3	3	3	3	3	4	4	3	3	3	3	3	3	3	4	1	1	1	1	1	1	1	1	1	1	1	1	1	1	1	1	1	1	1	1	1	1
600938	2	4	1	6	1	4	3	3	3	3	3	3	3	3	3	3	4	5	4	5	4	5	2	5	5	5	2	1	1	1	1	1	1	1	1	1	1	1	1	1	1	1	1	1	1	1	1	1	1
601521	2	13	2	9	1	4	2	3	1	1	2	1	1	1	1	1	5	5	5	5	2	1	4	5	5	5	2	1	1	1	1	1	1	1	1	3	1	1	1	1	1	1	1	1	1	1	1	1	1
601524	2	5	2	6	1	4	3	3	1	3	1	1	1	1	1	1	5	5	5	5	5	5	5	5	5	5	4	1	1	1	1	1	1	1	1	5	1	1	1	1	1	1	1	1	1	1	1	1	1
601835	2	12	1	3	1	4	3	4	1	2	2	1	1	1	1	1	5	5	5	4	5	5	5	5	5	5	1	1	1	1	1	1	1	1	1	3	1	1	1	1	1	1	1	1	1	1	1	1	1
602145	2	11	1	3	1	4	3	3	1	3	1	1	1	1	1	2	3	4	4	4	4	4	3	4	4	4	3	3	1	1	1	1	1	1	1	3	1	5	1	1	5	1	1	1	1	4	1	2	2
602384	1	5	2	6	1	4	1	1	1	1	1	1	1	1	1	1	5	5	5	5	5	5	5	5	5	5	1	1	1	1	1	1	1	1	1	1	1	1	1	1	1	1	1	1	1	1	1	1	1
602870	3	12	1	3	1	4	4	3	3	2	2	1	1	2	2	2	5	5	5	5	5	5	5	5	5	5	5	1	1	1	1	1	1	1	1	1	1	1	1	1	1	1	1	1	1	1	1	1	1
603042	2	13	1	3	1	4	4	3	2	3	3	2	2	1	1	2	5	5	5	5	5	5	5	5	5	5	5	1	1	1	1	1	1	1	1	3	1	1	1	1	1	1	1	1	1	1	1	1	1
603286	2	4	1	7	1	4	5	3	1	2	1	1	1	1	1	2	5	5	5	5	5	5	5	5	5	5	1	1	1	1	1	1	1	1	1	1	1	1	1	1	1	1	1	1	1	1	1	1	1
604673	2	13	1	6	1	4	5	5	1	5	2	1	1	2	2	4	5	5	5	5	5	5	4	5	5	5	3	1	1	1	1	1	1	1	1	3	1	1	1	1	1	1	1	1	1	1	1	1	1
604849	2	13	2	6	1	4	4	3	1	3	1	1	1	1	4	1	5	1	5	1	1	1	5	1	1	5	5	1	1	1	1	1	1	1	1	1	1	1	1	1	1	1	1	1	1	1	1	1	1
605052	1	5	2	5	1	4	4	2	1	2	1	1	3	3	3	3	5	5	4	5	4	5	5	5	5	5	2	1	1	1	1	1	1	1	1	2	1	1	1	1	1	1	1	1	1	1	1	1	1
605406	2	12	1	3	1	4	5	5	2	3	4	2	2	1	1	3	5	5	5	5	4	5	4	5	5	5	1	1	1	1	1	1	1	1	1	1	1	1	1	1	1	1	1	1	1	1	1	1	1
607194	2	4	1	3	2	4	5	5	1	5	4	1	2	1	1	1	5	5	5	5	5	5	5	5	5	5	5	1	1	1	1	1	1	1	1	3	1	1	1	1	1	1	1	1	1	1	1	3	1
609130	3	7	1	7	1	4	4	5	2	2	4	3	2	1	1	1	3	5	4	3	5	5	5	4	4	4	4	2	1	1	1	1	1	1	1	1	1	1	1	1	1	1	1	1	1	1	1	1	1
609933	1	11	5	6	1	4	5	4	2	4	4	1	1	1	1	2	4	4	4	4	5	5	5	5	5	5	2	2	1	1	1	1	1	1	1	3	1	1	1	1	1	1	1	1	1	1	1	1	1
610457	6	8	1	4	1	4	4	3	2	3	3	2	2	3	2	2	5	5	5	5	5	5	5	5	5	5	2	1	1	1	1	1	1	1	1	3	1	1	1	1	1	1	1	1	1	1	1	2	1
611056	1	5	2	6	1	4	5	4	3	4	4	2	3	3	3	4	4	5	4	4	5	2	3	2	2	3	4	1	1	1	1	1	1	1	1	1	1	1	1	1	1	1	1	1	1	1	1	1	1
611401	1	1	2	2	1	4	5	5	1	1	1	1	1	1	1	1	2	5	5	5	5	5	5	5	5	5	2	1	1	1	1	1	1	1	1	1	1	1	1	1	1	1	1	1	1	1	1	1	1
611656	2	12	1	3	1	4	3	4	1	3	3	2	1	2	2	3	5	4	4	4	4	4	4	4	4	5	5	1	1	1	1	1	1	1	1	1	1	1	1	1	1	1	1	1	1	1	1	1	1
611878	2	7	2	2	1	4	3	3	1	3	1	1	1	1	1	3	5	5	5	5	5	5	5	5	5	5	5	1	1	1	1	1	1	1	1	1	1	1	1	1	1	1	1	1	1	1	1	1	1
611884	3	12	1	3	1	4	4	4	1	3	3	1	1	5	1	2	5	5	5	3	4	5	5	5	5	5	5	2	1	1	1	1	1	1	1	3	1	1	1	1	1	1	1	1	1	1	1	1	1
613640	2	11	1	6	1	4	3	3	3	3	3	3	3	3	3	3	5	5	5	5	5	5	5	5	5	5	5	1	1	1	1	1	1	1	1	3	1	1	1	1	1	1	1	1	1	1	1	1	1
614277	1	5	2	4	1	4	4	5	3	1	3	3	4	1	1	1	2	2	2	2	2	2	4	5	5	5	1	5	1	1	1	1	1	1	1	1	1	1	1	1	1	1	1	1	1	1	1	1	1
614370	3	13	1	7	1	4	4	4	2	3	2	3	2	2	2	2	4	5	4	4	2	4	3	4	3	3	4	1	1	1	1	1	1	1	1	1	1	1	1	1	1	1	1	1	1	1	1	1	1
614589	5	1	1	6	1	4	4	4	4	4	3	3	3	3	3	3	4	4	4	4	4	4	4	4	4	3	5	1	1	1	1	1	1	1	1	5	1	1	1	1	1	1	1	1	1	1	1	1	1
615023	2	5	1	5	1	4	5	4	2	2	3	2	2	1	1	3	5	5	4	4	4	5	5	5	5	5	2	1	1	1	1	1	1	1	1	2	1	1	1	1	1	1	1	1	1	1	1	1	1
615130	4	5	1	9	1	4	3	3	1	1	1	1	1	1	1	2	5	5	5	5	5	5	5	5	5	5	4	1	1	1	1	1	1	1	1	3	1	1	1	1	1	1	1	1	1	1	1	1	1
615579	2	1	1	2	1	4	4	4	1	2	3	2	2	1	1	1	4	4	4	4	3	3	3	5	5	5	2	5	1	1	1	1	1	1	1	5	1	2	2	2	2	2	1	1	1	1	1	1	2
615765	5	5	1	4	1	4	1	1	1	1	1	1	1	1	1	1	5	5	5	5	5	5	5	5	5	5	4	1	1	1	1	1	1	1	1	5	1	1	1	1	1	2	1	1	1	1	1	1	1
615978	4	12	1	7	1	4	4	5	5	5	5	4	4	4	4	4	2	3	3	2	2	3	3	2	3	3	5	1	1	1	1	1	1	1	1	5	1	1	1	1	1	1	1	1	1	1	1	1	1
616250	4	12	1	5	1	4	5	5	3	3	3	3	3	3	3	5	3	3	3	4	3	3	3	3	3	3	5	1	1	1	1	1	1	1	1	1	1	1	1	1	1	1	1	1	1	1	1	1	1
616354	3	12	1	4	1	4	5	4	3	4	3	2	2	1	1	2	3	5	4	5	4	5	5	5	5	5	2	2	1	1	1	1	1	1	1	1	1	1	1	1	1	1	1	1	1	1	1	1	1
616590	4	12	1	6	1	4	3	4	1	3	4	1	1	1	1	4	5	5	5	5	5	5	4	5	5	5	4	1	1	1	1	1	1	1	1	1	1	1	1	1	1	1	1	1	1	1	1	1	1
618915	1	13	3	6	1	4	4	5	1	3	2	1	1	3	3	4	5	5	5	5	5	5	1	5	3	5	4	1	1	1	1	1	1	1	1	1	1	1	1	1	1	1	1	1	1	1	1	1	1
619068	1	4	2	3	1	4	5	2	1	3	3	1	1	2	2	2	5	5	5	5	5	5	5	5	5	5	5	1	1	1	1	1	1	1	1	2	1	1	1	1	1	1	1	1	1	1	1	1	1
619201	2	8	1	3	1	4	4	3	2	2	2	2	2	2	2	2	5	5	5	5	5	5	5	5	5	5	5	1	1	1	1	1	1	1	1	5	1	1	1	1	1	1	1	1	1	1	1	1	1
625984	2	11	1	5	1	4	3	3	1	3	1	1	1	1	1	1	5	5	5	5	5	5	5	5	5	5	5	1	1	1	1	1	1	1	1	3	1	1	1	1	1	5	1	1	1	1	1	1	1
626195	1	4	2	7	1	4	4	2	1	2	1	1	1	1	1	1	5	5	5	4	5	5	2	3	2	5	4	1	1	1	1	1	1	1	1	1	1	1	1	1	1	1	1	1	1	1	1	1	1
626668	2	5	2	6	1	4	1	1	1	1	1	1	1	1	1	1	5	5	5	5	5	5	5	5	5	5	1	1	1	1	1	1	1	1	1	1	1	1	1	1	1	1	1	1	1	1	1	1	1
629406	5	4	1	6	1	4	3	3	3	2	3	3	3	3	3	3	5	5	5	5	5	5	5	5	5	5	4	2	1	1	1	1	1	1	1	1	1	1	1	1	1	1	1	1	1	1	1	1	1
630391	4	5	1	4	1	4	5	4	3	4	4	3	3	3	3	3	5	5	5	5	4	5	3	5	4	4	4	5	1	1	1	1	1	1	1	1	1	1	1	1	1	1	1	1	1	1	1	1	1
635908	2	8	1	5	1	4	3	3	2	4	3	2	2	2	2	4	5	5	4	5	5	5	5	5	5	5	3	1	1	1	1	1	1	1	1	5	1	4	4	1	1	1	1	1	1	1	1	2	4
636135	2	8	1	7	1	4	4	3	2	3	4	3	2	3	2	3	3	5	5	2	3	5	3	5	5	5	1	5	1	1	1	1	1	1	1	1	1	1	1	1	1	1	1	1	1	1	1	1	1
644132	3	4	1	7	1	4	4	3	2	2	2	1	1	2	1	2	3	5	4	5	4	5	5	5	4	5	1	1	1	1	1	1	1	1	1	3	1	1	1	1	1	1	1	1	1	1	3	1	1
647510	4	8	1	3	1	4	5	5	1	5	2	1	1	1	1	2	4	4	4	3	4	3	2	2	2	4	2	1	1	1	1	1	1	1	1	2	1	1	1	1	1	1	1	1	1	1	1	1	1
647543	4	5	1	6	1	4	5	4	1	5	1	1	2	1	1	3	5	5	5	4	5	4	5	5	5	5	4	1	1	1	1	1	1	1	1	1	1	1	1	1	1	1	1	1	1	1	1	1	1
653055	1	11	2	3	1	4	3	3	2	2	2	1	1	1	1	1	4	5	5	4	5	5	5	5	5	5	4	1	1	1	1	1	1	1	1	3	1	1	1	1	1	1	1	1	1	1	1	1	1
653281	4	5	2	4	1	4	3	2	2	3	3	3	2	3	2	3	3	3	4	4	4	4	4	4	4	4	1	1	1	1	1	1	1	1	1	1	1	1	1	1	1	1	1	1	1	1	1	1	1
654196	1	5	2	3	1	4	1	1	1	1	1	1	1	1	1	1	5	5	5	5	5	5	5	5	5	5	5	1	1	1	1	1	1	1	1	1	1	1	1	1	1	1	1	1	1	1	1	1	1
659656	3	13	2	4	1	4	3	3	1	2	1	1	1	3	1	1	5	5	5	5	5	5	5	5	5	5	1	1	1	1	1	1	1	1	1	1	1	1	1	1	1	1	1	1	1	1	1	1	1
665199	3	13	3	3	1	4	4	3	2	3	2	3	2	3	3	3	5	5	5	5	5	5	5	5	5	5	4	1	1	1	1	1	1	1	1	1	1	1	1	1	1	1	1	1	1	1	1	1	1
665702	4	5	1	3	1	4	5	5	5	5	5	5	5	3	3	5	3	4	4	3	3	4	4	3	3	2	3	5	1	1	1	1	1	1	1	2	1	1	1	1	1	1	1	1	1	1	1	1	1
669710	2	13	2	4	1	4	5	4	4	3	3	4	3	3	3	3	5	5	5	5	5	5	5	5	5	5	1	1	1	1	1	1	1	1	1	1	1	1	1	1	1	1	1	1	1	1	1	1	1
670532	3	4	1	9	1	4	2	2	2	2	2	2	3	2	2	2	5	5	5	5	5	5	5	5	5	5	2	1	1	1	1	1	1	1	1	2	1	1	1	1	1	1	1	1	1	1	1	1	1
671814	2	8	1	4	1	4	3	3	2	3	3	1	1	3	1	3	5	5	5	5	5	5	5	5	5	5	2	1	1	1	1	1	1	1	1	2	1	1	1	1	1	1	1	1	1	1	1	1	1
671924	4	8	1	6	1	4	4	4	2	2	3	2	2	1	1	2	5	5	5	4	4	4	4	4	5	5	2	1	1	1	1	1	1	1	1	1	1	1	1	1	1	1	1	1	1	1	1	1	1
673930	4	4	1	6	1	4	2	2	3	2	2	2	3	2	2	2	3	4	4	3	4	4	4	3	4	3	1	1	1	1	1	1	1	1	1	1	1	1	1	1	1	1	1	1	1	1	1	1	1
676623	1	11	4	2	1	4	5	5	2	4	3	1	2	1	1	5	5	5	5	5	5	5	5	5	5	5	4	1	1	1	1	2	1	1	1	1	1	1	1	1	1	1	1	1	1	1	3	1	1
676635	4	2	1	3	1	4	4	4	1	4	3	1	1	1	1	1	3	5	4	4	4	5	5	5	5	5	2	1	1	1	1	1	1	1	1	3	1	1	1	1	1	1	1	1	1	1	1	1	1
680355	3	5	1	3	2	4	5	5	1	5	1	1	1	4	1	5	5	5	5	5	5	5	5	5	5	5	1	1	1	1	1	1	1	1	1	3	1	1	1	1	1	1	1	1	1	1	1	1	1
681844	3	6	2	4	2	4	4	5	2	2	4	1	1	3	1	2	3	4	3	3	3	4	2	3	3	4	5	2	1	1	1	1	1	1	1	5	2	2	1	1	2	2	1	1	1	1	1	3	5
684971	3	4	1	9	1	4	4	4	4	4	4	4	4	4	4	4	2	2	2	2	2	2	2	2	2	2	2	4	1	1	1	1	1	1	1	4	4	1	1	1	4	1	1	1	1	1	1	1	1
692499	1	8	2	3	2	4	3	5	1	1	1	1	1	1	1	1	4	3	4	5	4	5	3	5	5	5	2	2	1	1	1	1	1	1	1	1	1	1	1	1	1	1	1	1	1	1	1	1	1
694716	4	8	1	5	1	4	5	5	1	4	4	1	1	1	1	2	3	5	3	3	3	3	5	5	5	5	4	1	1	1	1	1	1	1	1	1	1	1	1	1	1	1	1	1	1	1	1	1	1
698524	2	3	1	2	1	4	4	4	3	3	3	3	3	2	2	2	5	5	5	5	5	5	1	5	5	5	4	4	1	1	1	1	1	1	1	1	1	1	1	1	1	1	1	1	1	1	1	1	1
699294	4	5	2	4	1	4	4	4	2	3	4	1	1	1	1	1	5	5	5	4	4	4	4	4	4	4	4	5	5	5	5	5	5	5	5	1	1	1	1	1	1	1	1	1	1	1	1	1	1
700263	4	13	2	6	1	4	2	3	2	2	2	2	2	3	3	3	5	5	5	5	5	5	5	5	5	5	1	1	1	1	1	1	1	1	1	1	1	1	1	1	1	1	1	1	1	1	1	1	1
709559	2	8	1	3	1	4	4	2	1	2	3	1	1	2	1	2	5	5	4	5	4	5	5	5	5	5	4	1	1	1	1	1	1	1	1	1	1	1	1	1	1	1	1	1	1	1	1	1	1
716369	2	5	1	3	1	4	4	4	1	4	4	3	2	2	1	1	4	4	5	5	5	5	5	5	5	5	1	1	1	1	1	1	1	1	1	1	1	1	1	1	1	1	1	1	1	1	1	1	1
721444	2	12	1	2	1	4	2	1	1	1	1	1	1	1	1	1	5	5	5	5	5	5	5	5	5	5	2	1	1	1	1	1	1	1	1	5	1	1	1	1	1	1	1	1	1	1	1	1	1
723297	4	8	2	6	1	4	3	3	3	3	3	1	1	3	3	3	5	5	5	5	5	5	5	5	5	5	5	1	1	1	1	1	1	1	1	1	1	1	1	1	1	1	1	1	1	1	1	1	1
723560	3	5	2	9	1	4	2	1	1	1	1	1	1	4	2	5	5	5	5	5	5	5	5	5	5	5	5	1	1	1	1	1	1	1	1	1	1	1	1	1	1	1	1	1	1	1	1	1	1
724748	4	4	1	8	1	4	4	4	1	2	1	1	1	1	1	1	4	5	5	5	5	5	5	5	5	5	4	1	1	1	1	1	1	1	1	5	2	1	1	1	1	1	1	1	1	1	1	1	1
725782	2	12	1	7	1	4	5	5	2	4	3	1	1	2	1	4	4	3	4	2	3	2	1	2	1	2	2	2	1	1	1	1	1	1	1	1	1	1	1	1	1	1	1	1	1	1	4	1	1
729190	2	5	1	7	1	4	3	3	3	3	3	2	2	2	3	3	5	5	5	5	5	5	5	5	5	5	4	1	1	1	1	1	1	1	1	3	1	1	1	1	1	1	1	1	1	1	1	1	1
731367	4	11	1	6	1	4	5	3	3	5	3	1	1	2	2	2	5	5	5	5	5	5	5	5	5	5	5	1	1	1	1	1	1	1	1	5	1	1	1	1	1	1	1	1	1	1	1	1	1
736052	4	4	1	6	1	4	5	5	1	3	3	2	1	1	1	1	5	5	5	5	5	5	5	5	5	5	4	1	1	1	1	1	1	1	1	3	1	1	1	1	1	1	1	1	1	1	1	1	1
736622	5	5	1	4	2	4	4	3	1	1	1	1	1	1	2	2	5	4	4	5	5	5	5	5	5	5	5	1	1	1	1	1	1	1	1	5	1	3	3	3	3	2	1	1	1	3	1	1	1
741428	4	5	1	9	1	4	3	3	1	3	1	1	1	1	1	1	5	5	5	5	5	5	5	5	5	5	2	1	1	1	1	1	1	1	1	2	1	1	1	1	1	1	1	1	1	1	1	1	1
745951	4	12	1	6	1	4	4	5	2	2	4	2	2	1	1	1	3	5	3	3	3	5	3	3	3	3	4	2	1	1	1	1	1	1	1	1	1	1	1	1	1	1	1	1	1	1	1	1	1
758496	4	5	2	6	1	4	3	3	2	2	2	2	2	2	2	2	5	5	5	5	5	5	5	5	5	5	2	1	1	1	1	1	1	1	1	1	1	1	1	1	1	1	1	1	1	1	1	1	1
761266	5	7	1	7	1	4	4	4	1	2	2	1	1	1	1	1	5	5	5	5	5	5	5	5	5	5	5	1	1	1	1	1	1	1	1	1	1	1	1	1	1	1	1	1	1	1	1	1	1
761431	2	2	1	4	1	4	4	4	3	3	3	3	3	3	3	3	4	5	5	5	5	5	5	5	5	5	1	1	1	1	1	1	1	1	1	3	1	1	1	1	1	1	1	1	1	1	1	1	1
761848	3	5	2	5	1	4	5	5	3	5	4	2	2	4	2	3	5	5	5	5	4	5	5	5	5	5	1	1	1	1	1	1	1	1	1	1	1	1	1	1	1	1	1	1	1	1	1	1	1
762392	3	5	2	7	1	4	4	4	1	4	4	3	3	3	1	2	5	5	5	5	5	5	5	5	5	5	2	1	1	1	1	1	1	1	1	1	1	1	1	1	1	1	1	1	1	1	1	1	1
762464	2	11	1	3	1	4	3	4	2	3	3	2	2	3	3	3	5	5	5	5	5	5	5	5	5	5	5	1	1	1	1	1	1	1	1	2	1	1	1	1	1	1	1	1	1	1	1	1	1
762708	2	2	2	6	1	4	4	2	2	3	2	1	1	3	3	3	5	5	5	5	5	5	5	5	5	5	4	1	1	1	1	1	1	1	1	5	1	4	1	1	5	5	1	1	4	4	1	2	1
763135	3	5	1	5	1	4	4	2	1	2	2	1	2	3	3	3	5	5	5	5	5	5	5	5	5	5	2	1	1	1	1	1	1	1	1	1	1	1	1	1	1	1	1	1	1	1	1	1	1
763310	2	13	5	4	1	4	4	4	1	3	3	1	1	1	1	1	5	5	5	5	5	5	2	5	4	5	3	5	1	4	1	1	1	1	1	5	1	2	2	1	3	5	1	1	1	4	1	1	1
763324	3	12	1	7	1	4	4	4	2	4	3	3	2	1	1	3	5	5	5	5	5	5	5	5	5	5	1	1	1	1	1	1	1	1	1	1	1	1	1	1	1	1	1	1	1	1	1	1	1
763440	2	12	1	6	1	4	5	5	4	3	5	3	3	3	3	3	3	5	3	4	5	5	5	5	5	5	2	1	1	1	1	1	1	1	1	1	1	1	1	1	1	1	1	1	1	1	1	1	1
763593	3	13	2	5	1	4	3	3	3	3	3	3	3	3	3	3	5	5	5	5	5	5	5	5	5	5	1	1	1	1	1	1	1	1	1	1	1	1	1	1	1	1	1	1	1	1	1	1	1
763645	2	12	1	3	1	4	5	4	4	4	4	4	4	4	4	4	5	5	5	5	4	5	5	5	5	5	3	3	1	1	1	1	1	1	1	3	1	1	1	1	3	1	1	1	1	1	1	1	1
764107	3	6	5	4	1	4	2	2	2	2	2	2	2	2	2	2	5	5	5	5	5	5	5	5	5	5	2	4	1	1	1	1	1	1	1	1	1	1	1	1	1	1	1	1	1	1	1	1	1
764201	2	12	1	3	1	4	5	5	2	5	5	3	3	1	1	3	5	4	5	4	4	5	5	5	5	5	4	4	1	1	1	1	1	1	1	1	1	1	1	1	1	1	1	1	1	1	1	1	1
764224	4	13	2	5	1	4	4	3	3	4	4	3	2	2	1	4	3	3	3	2	2	2	1	2	2	3	1	1	1	1	1	1	1	1	1	1	1	1	1	1	1	1	1	1	1	1	1	1	1
764423	1	6	2	6	1	4	2	2	1	2	2	1	1	1	1	5	5	4	4	4	5	4	3	4	4	5	4	1	1	1	1	1	1	1	1	2	1	1	1	1	1	1	1	1	1	1	1	1	1
764655	3	8	1	2	1	4	4	4	1	4	5	3	3	4	2	4	5	5	5	5	5	5	5	5	5	5	4	1	1	1	1	1	1	1	1	1	1	1	1	1	1	1	1	1	1	1	1	1	1
764774	2	13	1	7	1	4	3	3	3	3	3	3	3	3	3	3	5	5	5	5	5	5	5	5	5	5	5	1	1	1	1	1	1	1	1	3	1	1	1	1	1	1	1	1	1	1	1	1	1
764800	2	6	1	6	1	4	3	3	3	3	3	3	3	3	3	3	5	5	5	5	5	5	5	5	5	5	4	1	1	1	1	1	1	1	1	5	1	2	1	1	4	1	1	1	1	1	1	1	1
765132	2	4	1	2	1	4	4	4	4	4	4	4	4	4	4	4	3	5	4	4	4	4	4	4	4	4	1	1	1	1	1	1	1	1	1	1	1	1	1	1	1	1	1	1	1	1	1	1	1
765563	2	13	2	3	1	4	4	3	1	4	3	2	2	3	2	3	4	5	5	5	5	5	4	5	5	5	2	1	1	1	1	1	1	1	1	1	1	1	1	1	1	1	1	1	1	1	1	1	1
765675	2	8	1	4	1	4	2	5	1	1	2	1	1	1	1	4	5	5	5	5	4	4	4	5	5	5	2	1	1	1	1	1	1	1	1	1	1	1	1	1	1	1	1	1	1	1	1	1	1
767373	4	12	1	2	1	4	5	4	2	2	4	1	1	1	1	1	5	5	5	5	5	5	5	5	5	5	4	1	1	1	1	1	1	1	1	1	1	1	1	1	1	1	1	1	1	1	1	1	1
767392	5	5	1	5	1	4	5	5	1	5	5	1	1	3	3	3	5	5	5	3	5	5	3	3	3	5	4	1	1	1	1	1	1	1	1	3	1	1	1	1	1	1	1	1	1	1	1	1	1
767596	3	13	2	1	1	4	1	2	1	1	1	1	1	1	1	1	5	5	5	5	5	5	5	5	5	5	1	1	1	1	1	1	1	1	1	1	1	1	1	1	1	1	1	1	1	1	1	1	1
768760	3	5	2	6	2	4	4	4	1	3	4	1	1	1	1	1	4	1	4	1	2	2	2	3	3	5	4	1	1	1	1	1	1	1	1	2	1	1	1	1	1	1	1	1	1	1	1	2	2
769442	2	8	1	3	1	4	4	3	2	3	2	1	1	2	1	3	4	5	5	5	5	5	4	5	5	4	1	1	1	1	1	1	1	1	1	3	1	1	1	1	5	1	1	1	1	1	1	1	1
769649	1	5	2	3	1	4	5	5	2	5	4	3	2	2	1	3	2	3	3	3	4	4	1	2	2	3	1	2	1	1	1	1	1	1	1	1	1	1	1	1	1	1	1	1	1	1	1	1	1
769900	2	8	1	6	1	4	4	4	1	2	2	1	1	1	1	2	5	5	5	5	5	5	5	5	5	5	2	1	1	1	1	1	1	1	1	3	1	1	1	1	1	1	1	1	1	1	1	1	1
770203	2	2	3	3	1	4	2	2	2	3	2	1	1	2	2	4	5	5	5	5	5	5	5	5	5	5	2	1	1	1	1	1	1	1	1	1	1	1	1	1	1	1	1	1	1	1	1	1	1
770967	4	7	1	7	1	4	4	4	2	4	2	2	2	2	2	3	5	5	5	5	5	5	3	4	4	5	5	1	1	1	1	1	1	1	1	1	1	1	1	1	1	1	1	1	1	1	1	1	1
771272	1	8	2	7	1	4	3	4	2	4	2	2	2	3	1	2	2	1	3	1	2	2	1	1	1	2	1	1	1	1	1	1	1	1	1	1	1	1	1	1	1	1	1	1	1	1	1	1	1
771285	5	5	2	3	1	4	1	1	1	1	1	1	1	5	4	3	5	5	5	5	5	5	5	5	5	5	5	1	1	1	1	1	1	1	1	1	1	1	1	1	1	1	1	1	1	1	1	1	1
771988	3	12	1	5	1	4	4	3	1	3	4	1	1	3	3	3	4	3	4	3	5	4	5	4	5	5	1	5	1	1	1	1	1	1	1	1	1	1	1	1	1	1	1	1	1	1	1	1	1
772218	1	11	3	6	1	4	5	4	2	4	4	2	2	3	3	4	5	5	5	5	5	5	5	5	5	5	2	1	1	1	1	1	1	1	1	1	1	1	1	1	1	1	1	1	1	1	1	1	1
772788	1	7	2	6	1	4	4	4	2	2	4	1	2	4	1	4	3	3	3	3	3	3	2	4	4	3	2	4	1	1	1	1	1	1	1	5	2	1	1	1	1	1	1	1	1	1	1	1	5
772939	1	13	2	5	1	4	4	5	1	5	3	1	1	2	1	5	5	5	5	5	4	5	5	5	5	5	1	1	1	1	1	1	1	1	1	1	1	1	1	1	1	1	1	1	1	1	1	1	1
773128	4	5	1	6	1	4	5	5	1	3	4	2	2	1	1	2	3	5	5	5	4	5	4	5	5	5	2	1	1	1	1	1	1	1	1	1	1	1	1	1	1	1	1	1	1	1	1	1	1
773381	6	1	1	3	1	4	4	2	1	1	1	1	1	1	1	1	5	5	5	5	5	5	5	5	5	5	4	1	1	1	1	1	1	1	1	1	1	1	1	1	1	1	1	1	1	1	1	1	1
773584	3	2	1	8	1	4	4	4	1	2	2	1	1	1	1	1	5	5	5	5	5	5	5	5	5	5	4	1	1	1	1	1	1	1	1	3	1	1	5	1	1	1	1	1	1	1	1	1	1
774410	4	5	1	3	1	4	5	4	4	4	4	3	3	3	3	4	2	4	4	4	4	4	5	5	5	4	4	1	1	1	1	1	1	1	1	1	1	1	1	1	1	1	1	1	1	1	1	1	1
774568	1	4	2	9	1	4	1	1	1	1	1	1	1	1	2	2	5	5	4	5	5	5	4	5	5	5	5	1	1	1	1	1	1	1	1	3	1	3	5	1	1	1	1	1	2	1	1	1	1
774838	2	5	1	8	1	4	4	4	1	1	4	1	1	3	3	3	5	5	4	4	5	5	5	5	5	5	5	1	1	1	1	1	1	1	1	3	1	1	1	1	1	1	1	1	1	1	1	2	1
774840	4	5	1	6	1	4	2	2	2	2	2	2	2	2	2	2	5	5	5	5	5	5	5	5	5	5	1	1	1	1	1	1	1	1	1	1	1	1	1	1	1	1	1	1	1	1	1	1	1
775307	3	2	1	7	1	4	3	3	3	3	3	3	3	3	3	3	5	5	5	5	5	5	5	5	5	5	4	1	1	1	1	1	1	1	1	3	1	1	1	1	1	1	1	1	1	1	1	1	1
776054	2	1	1	6	1	4	3	3	3	3	3	3	3	3	2	3	5	5	5	5	5	5	5	5	5	5	5	1	1	1	1	1	1	1	1	3	1	1	1	1	1	1	1	1	1	1	1	1	1
776941	2	4	1	9	1	4	4	4	2	4	2	2	2	2	3	3	5	5	5	5	5	5	5	5	5	5	4	1	1	1	1	1	1	1	1	1	1	1	1	1	1	1	1	1	1	1	1	1	1
777092	1	13	1	6	2	4	4	4	1	2	1	2	1	1	1	1	5	4	5	4	5	4	4	4	4	4	2	1	1	1	1	3	1	2	3	3	1	2	1	1	1	1	1	1	1	1	1	2	5
777234	2	5	1	3	1	4	4	5	3	4	4	4	4	3	2	2	2	3	2	2	2	2	2	2	2	2	2	1	1	1	1	1	1	1	1	1	1	1	1	1	1	1	1	1	1	1	1	1	1
777238	2	8	1	6	1	4	5	5	1	2	4	1	1	1	1	1	5	5	5	4	4	4	1	3	3	4	4	1	1	1	1	1	1	1	1	1	1	1	1	1	1	1	1	1	1	1	1	1	1
777411	6	13	1	6	1	4	2	1	1	1	1	1	1	1	1	1	5	5	5	5	5	5	5	5	5	5	5	1	1	1	1	1	1	1	1	2	1	1	1	1	1	1	1	1	1	1	1	2	1
778290	2	12	1	5	1	4	3	3	3	3	3	3	3	3	3	3	5	5	5	5	5	5	5	5	5	5	5	1	1	1	1	1	1	1	1	1	1	1	1	1	1	1	1	1	1	1	1	1	1
778334	2	2	1	8	1	4	5	5	5	5	5	3	3	1	3	3	5	5	5	5	5	5	5	5	5	5	5	1	1	1	1	1	1	1	1	1	1	1	1	1	1	1	1	1	1	1	1	1	1
778413	1	5	2	3	1	4	4	5	1	3	1	1	1	1	1	1	5	5	5	5	5	5	5	5	5	5	5	1	1	1	1	1	1	1	1	4	1	1	1	1	1	1	1	1	1	1	1	1	1
778674	1	2	5	7	1	4	1	1	1	1	1	1	1	5	1	1	1	1	1	1	1	1	1	1	1	1	1	5	1	1	1	1	1	1	1	1	1	1	1	1	1	1	1	1	1	1	1	1	1
778790	3	7	1	4	1	4	4	3	2	3	2	3	3	1	1	3	5	5	5	5	5	5	5	5	5	5	5	1	1	1	1	1	1	1	1	1	1	1	1	1	1	1	1	1	1	1	1	1	1
778801	3	12	1	5	1	4	4	4	2	4	2	2	2	2	4	4	4	5	4	5	5	5	5	5	5	5	5	1	1	1	1	1	1	1	1	5	1	1	1	1	1	1	1	1	1	1	1	1	1
778935	3	12	1	4	1	4	5	5	3	4	4	3	2	1	1	2	5	5	5	5	5	5	5	5	5	5	5	1	1	1	1	1	1	1	1	3	1	1	1	1	1	1	1	1	1	1	1	1	1
779215	2	2	1	4	1	4	3	4	3	3	3	2	1	4	4	4	2	3	3	3	4	5	3	3	3	2	3	2	1	1	1	1	1	1	1	3	1	1	1	1	1	1	1	1	1	1	1	1	1
779575	4	5	1	3	1	4	4	4	1	1	1	1	1	1	1	2	5	5	5	5	5	5	5	5	5	5	4	1	1	1	1	1	1	1	1	1	1	1	1	1	1	1	1	1	1	1	1	1	1
780209	4	4	1	9	1	4	4	4	5	4	4	4	4	4	4	4	5	5	5	5	5	5	5	5	5	5	1	1	1	1	1	1	1	1	1	3	1	1	1	1	1	1	1	1	1	1	1	1	1
780357	1	2	2	9	1	4	4	4	1	4	3	2	1	1	1	1	5	5	5	5	5	5	5	5	5	5	5	1	1	1	1	1	1	1	1	5	1	4	1	1	4	4	1	1	1	1	1	1	1
780437	2	12	1	4	1	4	5	4	2	4	3	3	2	4	4	4	4	5	5	4	5	5	5	5	5	5	4	2	1	1	1	1	1	1	1	5	2	1	1	1	5	1	1	1	1	1	1	1	1
780631	2	11	1	7	1	4	4	3	1	3	1	1	1	1	1	1	5	5	5	5	5	5	5	5	5	5	4	1	1	1	1	1	1	1	1	1	1	1	1	1	1	1	1	1	1	1	1	1	1
780773	2	13	1	3	1	4	4	4	2	3	4	2	1	1	1	1	4	5	5	5	5	5	4	5	5	5	4	1	1	1	1	1	1	1	1	3	1	1	1	1	1	1	1	1	1	1	1	1	1
781081	1	13	3	3	1	4	4	3	1	3	2	1	1	1	1	3	4	5	5	5	5	5	5	5	5	5	4	2	1	1	1	1	1	1	1	5	1	1	1	1	1	1	1	1	1	1	1	1	1
781459	2	5	6	4	1	4	3	3	3	3	3	3	3	3	3	3	4	3	4	4	4	4	4	3	4	4	1	1	1	1	1	1	1	1	1	1	1	1	1	1	1	1	1	1	1	1	1	1	1
781484	4	5	1	6	1	4	5	5	1	4	4	1	1	1	1	2	5	5	5	5	5	5	5	5	5	5	5	1	1	1	1	1	1	1	1	5	1	1	1	1	1	3	1	1	1	1	1	1	1
781786	1	5	2	4	1	4	4	4	2	4	2	2	2	2	2	2	5	5	5	5	5	5	5	5	5	5	4	1	1	1	1	1	1	1	1	1	1	1	1	1	1	1	1	1	1	1	1	1	1
782154	2	11	2	6	1	4	5	4	3	3	3	1	1	1	1	1	5	5	5	5	5	5	5	5	5	5	5	5	1	1	1	1	1	1	1	1	1	1	1	1	1	1	1	1	1	1	1	1	1
782192	3	12	1	6	1	4	5	4	1	5	5	3	3	4	1	3	5	5	5	5	5	5	5	5	5	3	4	1	1	1	1	1	1	1	1	2	1	1	1	1	1	1	1	1	1	1	1	1	1
782252	4	5	1	3	1	4	4	4	1	2	3	2	1	1	1	2	3	3	4	2	2	2	2	2	2	2	4	1	1	1	1	1	1	1	1	5	1	4	1	1	1	1	1	1	1	1	1	1	1
782327	2	12	1	6	1	4	3	4	1	2	2	1	1	1	1	3	5	5	5	5	5	5	5	5	5	5	2	1	1	1	1	1	1	1	1	3	1	1	1	1	1	1	1	1	1	1	1	1	1
782356	2	12	1	3	1	4	5	4	1	1	1	1	1	1	1	1	5	5	5	5	5	5	5	5	5	5	1	1	1	1	1	1	1	1	1	1	1	1	1	1	1	1	1	1	1	1	1	1	1
782621	2	5	1	4	1	4	5	5	1	1	1	1	1	4	4	3	5	5	5	5	5	5	5	5	5	5	2	1	1	1	1	1	1	1	1	3	1	1	1	1	1	1	1	1	1	1	1	1	1
783210	2	12	1	5	1	4	2	2	2	3	3	2	2	2	1	3	5	5	5	5	5	5	5	5	5	5	2	1	1	1	1	1	1	1	1	1	1	1	1	1	1	1	1	1	1	1	1	1	1
783464	2	5	1	9	1	4	3	5	1	1	1	1	1	1	3	3	5	5	5	5	5	5	5	5	5	5	5	1	1	1	1	1	1	1	1	3	1	1	1	1	1	1	1	1	1	1	1	1	1
783597	4	12	1	6	2	4	5	3	1	2	2	1	1	2	2	4	3	5	5	5	5	5	2	5	5	5	4	1	1	1	1	1	1	1	1	1	1	1	1	1	1	1	1	1	1	1	1	1	1
784085	2	12	1	6	1	4	3	3	3	3	3	3	3	3	3	3	5	5	5	5	5	5	5	5	5	5	5	1	1	1	1	1	1	1	1	1	1	1	1	1	1	1	1	1	1	1	1	1	1
784387	3	8	5	5	1	4	4	5	3	3	3	2	1	1	1	2	5	5	5	2	3	3	2	3	5	5	2	4	1	1	1	1	1	1	1	2	1	1	1	1	1	1	1	1	1	1	1	1	1
784820	3	2	1	6	1	4	3	2	1	2	3	1	1	1	1	2	5	4	5	4	4	5	4	4	4	4	4	1	1	1	1	1	1	1	1	3	1	1	1	1	1	1	1	1	1	1	1	2	1
784821	2	8	2	2	1	4	3	3	1	3	3	1	1	3	1	3	4	4	5	5	5	5	5	5	5	5	2	1	1	1	1	1	1	1	1	1	1	1	1	1	1	1	1	1	1	1	1	1	1
784828	1	13	5	6	1	4	5	4	1	4	3	1	1	1	1	2	5	5	5	5	4	5	4	5	5	5	1	1	1	1	1	1	1	1	1	2	1	1	1	1	1	1	1	1	1	1	1	1	1
785248	4	8	1	5	1	4	3	4	2	1	1	1	1	1	1	1	5	5	5	5	5	5	5	5	5	5	4	1	1	1	1	1	1	1	1	1	1	1	1	1	1	1	1	1	1	1	1	1	1
786173	3	7	1	5	1	4	4	1	1	3	2	1	1	1	1	2	5	5	5	5	5	5	5	5	5	5	4	1	1	1	1	1	1	1	1	3	1	1	1	1	1	1	1	1	1	1	1	1	1
786340	4	8	1	6	1	4	3	2	3	2	3	3	2	2	3	3	2	3	3	2	2	3	2	3	4	3	4	1	1	1	1	1	1	1	1	5	1	1	3	1	1	1	1	1	1	3	1	1	1
786399	3	2	1	3	2	4	4	3	1	1	1	1	1	1	1	4	4	5	5	5	5	5	5	5	5	5	4	1	1	1	1	1	1	1	1	5	1	4	1	1	1	2	1	1	1	1	1	1	1
786401	1	4	2	6	1	4	5	5	5	5	1	1	1	5	5	5	1	1	1	1	1	1	1	1	1	5	5	5	1	1	1	1	1	1	1	3	1	1	1	1	1	1	1	1	1	1	1	2	2
786595	2	13	1	7	1	4	4	4	3	3	3	2	2	2	2	2	5	5	5	4	5	5	5	5	5	5	4	1	1	1	1	1	1	1	1	3	1	4	5	1	3	1	1	1	1	3	1	1	2
786703	2	12	1	5	1	4	4	5	1	4	1	1	1	1	1	1	4	5	5	4	5	5	5	5	5	5	2	2	1	1	1	1	1	1	1	1	1	1	1	1	1	1	1	1	1	1	1	1	1
787007	4	4	1	4	1	4	3	4	1	3	3	1	1	1	1	2	5	5	5	5	5	5	5	5	5	5	2	3	1	1	1	1	1	1	1	3	2	1	1	1	1	1	1	1	1	1	1	2	1
787140	4	11	1	2	2	4	4	3	1	2	1	1	1	2	1	2	5	5	5	5	5	5	5	5	5	5	1	1	1	1	1	1	1	1	1	5	1	2	2	1	3	5	2	1	1	1	1	1	1
787587	2	13	1	6	1	4	3	3	3	2	3	3	3	3	3	4	5	5	5	5	5	5	3	5	3	5	5	3	1	1	1	1	1	1	1	3	1	1	1	1	1	1	1	1	1	1	2	2	1
787832	2	12	1	6	1	4	5	3	3	4	3	2	2	2	1	3	5	5	5	5	5	5	5	5	5	5	2	1	1	1	1	1	1	1	1	1	1	1	1	1	1	1	1	1	1	1	1	1	1
788115	1	13	5	4	1	4	3	3	1	2	2	1	1	1	1	2	5	5	5	5	5	4	5	5	5	5	2	5	1	1	1	1	1	1	1	3	1	2	1	1	1	1	1	1	1	2	1	2	5
788151	2	12	1	5	1	4	3	2	1	3	3	2	1	2	1	3	5	5	5	5	5	5	5	5	5	5	1	1	1	1	1	1	1	1	1	1	1	1	1	1	1	1	1	1	1	1	1	1	1
788229	1	5	3	7	1	4	5	5	1	4	5	2	1	1	1	2	5	3	3	3	4	3	1	1	1	2	4	3	1	1	1	1	1	1	1	1	1	1	1	1	1	1	1	1	1	1	1	1	1
788281	1	13	2	6	1	4	5	4	3	3	4	2	2	4	2	3	5	5	5	5	4	5	2	5	5	5	2	5	1	1	1	1	1	1	1	1	1	1	1	1	1	1	1	1	1	1	1	1	1
788576	1	13	2	4	1	4	4	4	1	4	3	1	1	1	1	4	5	4	4	3	4	2	5	5	5	5	2	1	1	1	1	1	1	1	1	1	1	1	1	1	1	1	1	1	1	1	1	1	1
788679	2	12	1	3	1	4	4	4	3	3	3	3	3	3	3	4	3	3	3	3	3	3	3	3	3	4	4	1	1	1	1	1	1	1	1	1	1	1	1	1	1	1	1	1	1	1	1	1	1
788869	4	1	1	6	1	4	3	3	3	3	3	3	3	3	3	3	5	5	5	5	5	5	5	5	5	5	5	1	1	1	1	1	1	1	1	3	1	1	1	1	1	1	1	1	1	1	1	1	1
788901	3	7	1	3	1	4	3	4	2	2	2	2	2	3	2	4	3	4	2	3	1	4	2	5	4	5	4	2	1	1	1	1	1	1	1	1	1	1	1	1	1	1	1	1	1	1	1	1	1
789051	5	13	1	1	1	4	3	4	1	3	3	2	1	1	1	3	5	4	5	5	5	5	2	5	5	5	5	1	1	1	1	1	1	1	1	5	1	1	1	1	1	1	1	1	1	2	1	2	5
789509	3	8	1	3	1	4	4	4	1	1	3	1	1	1	1	1	3	5	5	5	5	5	5	5	5	5	2	1	1	1	1	1	1	1	1	2	1	1	1	1	1	1	1	1	1	1	1	1	1
795251	4	12	1	6	1	4	1	1	1	1	1	1	1	5	2	5	4	4	4	4	4	4	4	4	4	4	1	1	1	1	1	1	1	1	1	1	1	1	1	1	1	1	1	1	1	1	1	1	1
795772	3	1	1	7	1	4	2	4	1	1	1	1	1	1	1	2	5	5	5	4	5	5	1	5	5	5	4	1	1	1	1	1	1	1	1	5	1	1	1	1	2	2	1	1	1	1	1	1	2
796324	5	5	1	4	1	4	3	3	3	3	3	3	3	3	3	3	5	5	5	5	5	5	5	5	5	5	2	1	1	1	1	1	1	1	1	5	1	3	3	1	1	1	1	1	1	1	1	1	1
797727	2	2	1	4	1	4	3	2	1	2	3	1	1	4	4	1	4	4	5	5	5	3	2	2	1	5	3	5	1	1	1	1	1	1	1	3	2	1	1	1	1	1	1	1	1	1	1	2	1
797842	3	7	1	6	1	4	4	2	1	4	1	1	1	4	3	4	5	5	5	5	5	5	5	5	5	5	5	1	1	1	1	1	1	1	1	5	1	2	2	2	2	1	1	1	1	1	1	1	1
797979	4	12	1	5	1	4	4	4	3	4	4	2	3	1	1	1	5	5	5	5	5	5	5	5	5	5	4	5	1	1	1	1	1	1	1	1	1	1	1	1	1	1	1	1	1	1	1	1	1
798178	3	4	1	4	1	4	2	3	4	3	4	3	4	3	4	3	2	3	4	4	3	2	3	4	3	4	2	3	3	3	2	3	3	2	2	2	3	2	2	2	2	3	3	2	3	2	2	2	3
798406	2	13	1	6	1	4	5	3	1	4	2	1	1	1	1	2	5	5	5	5	5	5	4	5	5	5	5	1	1	1	1	1	1	1	1	1	1	1	1	1	1	1	1	1	1	1	1	1	1
798562	4	13	2	6	1	4	3	4	2	2	3	1	1	3	1	2	5	3	5	2	3	1	1	1	1	1	2	1	1	1	1	1	1	1	1	1	1	1	1	1	1	1	1	1	1	1	1	1	1
798810	2	5	1	5	2	4	3	3	3	3	3	3	3	3	3	3	5	5	5	5	5	5	5	5	5	5	5	1	1	1	1	1	1	1	1	5	1	3	3	5	3	3	1	1	1	1	1	1	1
799927	2	12	1	5	1	4	4	3	2	3	3	2	3	1	1	3	4	3	2	3	2	4	2	3	2	2	4	1	1	1	1	1	1	1	1	1	1	1	1	1	1	1	1	1	1	1	1	1	1
800321	1	9	5	5	1	4	3	4	2	4	2	2	2	3	3	3	5	5	3	3	4	5	3	5	5	5	1	1	1	1	1	1	1	1	1	5	1	1	1	1	1	1	1	1	1	1	1	1	1
800574	2	2	1	4	1	4	4	4	2	4	2	1	1	1	1	3	5	5	5	5	5	5	5	5	5	5	1	1	1	1	1	1	1	1	1	5	1	4	4	1	1	1	1	1	1	1	1	2	1
800618	2	8	1	2	1	4	1	3	1	1	1	1	1	1	1	3	5	5	5	5	5	5	5	5	5	5	5	4	1	1	1	1	1	1	1	1	1	1	1	1	1	1	1	1	1	1	1	1	1
800657	1	4	5	6	1	4	2	1	1	1	1	1	1	1	1	1	3	3	3	3	3	3	3	3	3	3	4	1	1	1	1	1	1	1	1	1	1	1	1	1	1	1	1	1	1	1	1	1	1
801049	1	5	2	6	1	4	4	4	3	3	4	3	3	3	3	3	2	1	2	2	2	2	1	2	1	1	5	1	1	1	1	1	1	1	1	4	1	1	1	1	1	1	1	1	1	1	1	2	1
802016	2	12	1	3	1	4	2	2	2	2	2	1	1	1	1	1	5	5	5	5	5	5	5	5	5	5	1	1	1	1	1	1	1	1	1	1	1	1	1	1	1	1	1	1	1	1	1	1	1
802188	4	4	1	6	1	4	5	5	5	4	4	5	5	4	5	4	5	5	5	5	5	5	5	5	5	5	4	1	1	1	1	1	1	1	1	1	1	1	1	1	1	1	1	1	1	1	1	1	1
802523	2	13	1	3	1	4	5	4	3	4	3	3	3	3	3	4	4	5	5	4	5	5	5	5	5	5	5	3	1	1	1	1	1	1	1	1	1	1	1	1	1	1	1	1	1	1	1	1	1
802908	4	6	1	5	1	4	5	4	2	5	2	1	1	1	1	1	5	5	5	5	5	5	5	5	5	5	2	1	1	1	1	1	1	1	1	1	1	1	1	1	1	1	1	1	1	1	1	1	1
804814	1	11	2	2	1	4	3	2	1	2	1	1	1	1	1	1	5	5	5	5	5	5	5	5	5	5	2	1	1	1	1	1	1	1	1	1	1	1	1	1	1	1	1	1	1	1	1	1	1
805709	2	2	2	7	1	4	4	3	3	3	3	3	3	3	3	3	5	5	5	5	5	5	5	5	5	5	4	1	1	1	1	1	1	1	1	5	1	1	1	1	1	1	1	1	1	1	1	1	1
805773	1	2	2	6	1	4	4	4	2	4	4	2	2	2	2	2	5	5	5	4	4	4	4	4	4	4	2	1	1	1	1	1	1	1	1	1	1	1	1	1	1	1	1	1	1	1	1	1	1
805901	5	4	1	8	1	4	2	2	2	2	2	2	2	2	2	2	5	5	5	5	5	5	5	5	5	5	5	1	1	1	1	1	1	1	1	2	1	1	1	1	1	1	1	1	1	1	1	2	1
806059	3	13	1	3	1	4	3	3	3	3	3	3	3	3	3	3	3	4	5	5	5	5	5	5	5	5	2	1	1	1	1	1	1	1	1	1	1	1	1	1	1	1	1	1	1	1	1	1	1
806097	2	5	1	3	1	4	5	5	1	1	1	1	1	1	1	2	5	5	5	5	5	5	5	5	5	5	5	1	1	1	1	1	1	1	1	1	1	1	1	1	1	1	1	1	1	1	1	1	1
806336	3	13	1	6	1	4	3	2	1	2	1	1	1	2	2	2	5	5	5	5	5	5	5	5	5	5	5	1	1	1	1	1	1	1	1	3	1	5	1	1	1	1	1	1	1	1	1	2	4
806998	2	12	1	3	1	4	5	4	1	5	5	2	2	1	1	1	5	5	5	5	5	5	5	5	5	5	2	1	1	1	1	1	1	1	1	1	1	1	1	1	1	1	1	1	1	1	1	1	1
807032	2	11	1	6	1	4	2	4	2	2	2	2	2	2	2	2	4	5	5	4	5	5	5	5	5	5	4	1	1	1	1	1	1	1	1	3	1	1	1	1	5	1	1	1	1	1	1	1	1
807150	3	13	2	3	1	4	3	3	1	2	1	1	1	1	2	4	3	3	4	4	2	4	3	3	4	4	2	1	1	1	1	1	1	1	1	1	1	1	1	1	1	1	1	1	1	1	1	1	1
807258	4	4	1	7	1	4	5	3	3	5	3	3	3	3	3	3	5	5	5	5	5	5	5	5	5	5	5	1	1	1	1	1	1	1	1	1	1	1	1	1	1	1	1	1	1	1	1	1	1
807604	4	3	1	6	1	4	1	1	1	1	1	1	1	2	1	2	5	5	5	5	5	5	5	5	5	5	2	1	1	1	1	1	1	1	1	5	2	2	4	1	1	1	1	1	1	1	1	1	1
807737	2	5	1	2	1	4	4	4	1	4	3	2	2	2	2	3	3	5	4	5	5	5	5	5	5	5	5	1	1	1	1	1	1	1	1	3	1	1	1	1	1	1	1	1	1	1	1	1	1
807979	2	12	1	6	2	4	3	2	1	2	1	1	1	4	4	3	5	5	5	5	5	5	2	5	5	5	1	1	1	1	1	1	1	1	1	1	1	1	1	1	1	1	1	1	1	1	1	1	1
808138	2	1	1	6	1	4	2	2	1	1	2	1	1	1	1	2	5	5	5	5	5	5	5	5	5	2	5	1	1	1	1	1	1	1	1	1	1	1	1	1	1	1	1	1	1	1	1	2	1
808882	5	5	1	6	1	4	3	3	3	3	3	3	3	3	3	4	5	5	5	5	5	5	5	5	5	5	4	1	1	1	1	1	1	1	1	1	1	1	1	1	1	1	1	1	1	1	1	1	1
809410	1	13	5	6	1	4	5	4	2	4	4	2	2	1	1	1	5	5	4	4	4	4	4	5	5	5	3	1	1	1	1	1	1	1	1	3	2	1	1	1	1	1	1	1	1	1	1	3	1
809661	4	7	1	4	1	4	3	2	2	2	2	1	1	1	1	2	5	5	5	5	5	5	5	5	5	5	5	1	1	1	1	1	1	1	1	3	1	1	1	1	1	1	1	1	1	1	1	1	1
809868	1	13	2	3	2	4	2	2	1	1	1	1	1	1	1	2	1	1	4	1	1	1	2	1	3	3	2	5	1	1	1	1	1	1	1	5	1	5	1	5	1	5	1	1	3	4	1	1	1
810301	1	5	2	6	1	4	2	2	1	1	1	1	1	1	1	1	5	5	5	5	5	5	5	5	5	5	2	1	1	1	1	1	1	1	1	3	1	1	1	1	1	1	1	1	1	1	1	2	1
810728	2	13	1	6	1	4	4	4	2	4	4	2	2	3	2	3	4	5	5	5	5	5	5	5	5	4	5	1	1	1	1	1	1	1	1	3	2	1	1	1	1	1	1	1	1	1	1	2	1
811098	2	8	1	7	1	4	2	1	1	1	2	2	1	1	1	1	5	5	5	5	5	5	5	5	5	5	4	1	1	1	1	1	1	1	1	1	1	1	1	1	1	1	1	1	1	1	1	1	1
811698	2	12	1	5	1	4	5	5	2	4	4	2	3	2	1	2	4	4	4	4	3	4	3	5	5	4	2	1	1	1	1	1	1	1	1	3	1	5	1	1	2	1	1	1	1	1	1	1	1
813689	1	2	2	6	1	4	3	4	3	2	4	3	3	3	3	3	4	4	4	4	4	5	5	5	5	5	2	1	1	1	1	1	1	1	1	1	1	1	1	1	1	1	1	1	1	1	1	1	1
814145	3	7	1	6	1	4	2	2	1	1	1	1	1	1	1	1	5	5	5	5	5	5	5	5	5	5	5	1	1	1	1	1	1	1	1	1	1	1	1	1	1	1	1	1	1	1	1	1	1
814164	2	13	1	6	1	4	3	3	3	3	3	3	3	3	3	3	5	5	5	5	5	5	5	5	5	5	5	1	1	1	1	1	1	1	1	1	1	1	1	1	1	1	1	1	1	1	1	1	1
814663	1	7	2	3	2	4	4	4	1	5	4	1	1	4	1	5	4	5	5	5	5	4	4	5	5	5	2	1	1	1	1	1	1	1	1	3	1	3	1	1	1	1	1	1	1	3	1	1	1
814773	1	5	2	4	1	4	5	5	4	4	4	3	4	5	4	4	4	4	4	4	4	4	4	4	4	4	5	2	1	1	1	1	1	1	1	2	1	1	1	1	1	1	1	1	1	1	1	1	1
815129	2	12	1	5	1	4	3	3	3	3	3	3	3	3	3	3	3	3	3	3	3	3	3	3	3	3	5	1	1	1	1	1	1	1	1	1	1	1	1	1	1	1	1	1	1	1	1	1	1
815205	2	5	1	5	1	4	4	3	2	2	2	1	1	1	1	1	3	3	3	3	3	2	2	2	2	3	4	1	1	1	1	1	1	1	1	4	1	1	1	1	1	1	1	1	1	1	1	1	1
815567	2	2	5	3	1	4	4	4	4	4	4	4	4	4	4	4	5	5	5	5	5	5	5	5	5	5	5	1	1	1	1	1	1	1	1	5	1	1	1	1	1	1	1	1	1	1	1	1	1
815853	3	11	1	6	1	4	4	3	1	2	2	1	1	2	2	4	5	5	5	5	4	5	5	5	5	5	3	1	1	1	1	1	1	1	1	3	1	1	1	1	1	1	1	1	1	1	1	2	1
816073	3	11	1	9	1	4	3	3	2	2	2	2	2	2	2	2	5	5	5	5	5	5	5	5	5	5	5	1	1	1	1	1	1	1	1	2	2	1	1	1	1	1	1	1	1	1	1	1	1
816204	1	5	2	4	2	4	3	3	1	3	3	3	2	3	3	3	4	5	5	5	5	4	5	5	4	4	5	1	1	1	1	1	1	1	1	2	1	1	1	1	1	1	1	1	1	1	1	1	1
816468	1	13	2	6	1	4	3	2	3	3	4	3	2	3	3	3	3	2	3	3	3	3	3	4	3	3	3	4	3	3	3	3	3	3	3	1	1	1	1	1	1	1	1	1	1	1	1	1	1
816684	3	13	1	2	1	4	3	3	3	3	3	3	3	3	3	3	5	5	5	5	5	5	5	5	5	5	1	1	1	1	1	1	1	1	1	1	1	1	1	1	1	1	1	1	1	1	1	1	1
817387	3	5	5	5	1	4	3	3	1	1	1	1	1	1	1	3	5	5	5	5	5	5	5	5	5	5	2	1	1	1	1	1	1	1	1	5	1	1	1	1	1	1	1	1	1	1	1	1	1
817472	2	5	1	7	1	4	4	5	1	1	3	1	1	1	1	1	4	5	5	5	5	5	5	5	5	5	1	1	1	1	1	1	1	1	1	1	1	1	1	1	1	1	1	1	1	1	1	1	1
817606	58	8	1	3	1	4	4	4	4	4	4	4	4	4	4	4	3	3	3	3	3	3	3	3	3	3	1	2	1	1	1	1	1	1	1	1	1	1	1	1	1	1	1	1	1	1	1	1	1
817887	2	12	1	3	1	4	4	3	3	3	4	3	3	2	2	3	4	5	4	5	5	5	5	5	5	5	2	2	1	1	1	1	1	1	1	2	1	1	1	1	1	1	1	1	1	1	1	1	1
818192	1	7	2	6	1	4	3	3	3	3	3	3	3	3	3	3	5	5	5	5	5	5	5	5	5	5	2	1	1	1	1	1	1	1	1	1	1	1	1	1	1	1	1	1	1	1	1	1	1
819850	2	12	1	6	1	4	4	4	2	3	4	1	1	2	1	2	4	5	5	4	5	5	4	5	5	5	2	1	1	1	1	1	1	1	1	1	1	1	1	1	1	1	1	1	1	1	1	1	1
819890	2	5	1	6	1	4	4	4	3	3	3	2	2	2	2	2	5	5	5	5	5	5	4	5	5	5	5	1	1	1	1	1	1	1	1	3	2	1	1	1	1	1	1	1	1	1	1	2	1
820203	3	12	1	3	1	4	5	4	1	3	3	1	1	1	1	1	4	5	5	5	5	5	5	5	5	5	1	1	1	1	1	1	1	1	1	2	1	1	1	1	1	1	1	1	1	1	1	1	1
822402	2	7	2	2	1	4	4	3	2	4	2	1	1	1	1	1	5	5	5	5	5	5	5	5	5	5	2	1	1	1	1	1	1	1	1	5	1	1	1	1	1	1	1	1	1	1	1	1	1
822477	2	6	5	2	1	4	4	1	1	1	1	1	1	1	1	1	5	4	3	4	4	4	2	3	3	5	4	2	1	1	1	1	1	1	1	3	2	1	1	1	1	1	1	1	1	1	1	2	5
822486	2	12	1	7	1	4	4	4	1	3	2	3	1	1	1	3	5	5	5	5	5	5	5	5	5	5	5	1	1	1	1	1	1	1	1	3	1	1	1	1	5	1	1	1	1	1	1	1	1
822581	1	13	4	3	1	4	5	5	4	4	4	3	4	4	4	4	5	5	5	5	5	5	5	5	5	5	5	5	1	1	1	1	1	1	1	1	1	1	1	1	1	1	1	1	1	1	1	1	1
822940	47	8	2	3	1	4	3	3	3	3	3	3	3	3	3	3	5	5	5	5	5	5	5	5	5	5	1	1	1	1	1	1	1	1	1	1	1	1	1	1	1	1	1	1	1	1	1	1	1
822941	3	12	1	2	1	4	5	3	3	5	3	3	3	2	2	4	5	5	5	3	3	3	5	5	5	5	4	5	1	1	1	1	1	1	1	3	1	1	1	1	1	1	1	1	1	3	1	1	1
823242	2	6	1	7	1	4	3	3	3	3	3	3	3	3	3	2	4	4	4	4	4	4	5	4	4	5	4	1	1	1	1	1	1	1	1	2	1	1	1	1	1	1	1	1	1	1	1	1	1
823401	2	5	1	6	1	4	3	3	3	3	3	3	3	3	3	3	5	5	5	5	5	5	5	5	5	5	4	2	1	2	1	1	1	1	1	2	1	1	1	1	1	1	1	1	1	1	1	2	1
823594	2	5	2	6	1	4	4	4	1	3	4	3	2	3	4	3	3	4	3	2	3	4	3	2	3	4	1	1	1	1	1	1	1	1	1	1	1	1	1	1	1	1	1	1	1	1	1	1	1
823970	3	4	1	6	1	4	4	4	1	2	3	1	1	1	1	3	3	2	3	2	2	3	3	4	3	3	5	5	1	1	1	1	1	1	1	1	1	1	1	1	1	1	1	1	1	1	1	1	1
824197	1	13	2	3	1	4	4	4	1	1	2	1	1	1	1	1	5	5	5	5	5	5	5	5	5	5	5	1	1	1	1	1	1	1	1	3	1	1	1	1	1	1	1	1	1	1	1	1	1
824825	2	5	1	7	1	4	4	4	3	3	4	3	4	3	3	3	3	3	4	3	3	4	3	3	3	3	4	1	1	1	1	1	1	1	1	1	1	1	1	1	1	1	1	1	1	1	1	1	1
824941	2	2	1	5	1	4	3	1	1	1	1	1	1	1	1	1	5	5	5	5	5	5	5	5	5	5	1	1	1	1	1	1	1	1	1	1	1	1	1	1	1	1	1	1	1	1	1	1	1
825029	2	4	1	3	1	4	4	4	4	4	3	3	3	3	3	3	5	5	5	4	5	5	5	5	5	5	5	1	1	1	1	1	1	1	1	1	1	1	1	1	1	1	1	1	1	1	1	1	1
825726	2	5	1	6	1	4	1	1	1	1	5	1	1	1	1	5	5	5	4	5	4	5	5	5	5	5	5	1	1	1	1	1	1	1	1	3	1	1	1	1	1	1	1	1	1	1	1	2	1
826351	4	13	1	3	1	4	3	3	3	3	3	3	3	3	3	3	4	4	4	3	3	3	4	4	4	3	4	2	1	1	1	1	1	1	1	3	1	1	1	1	1	2	1	1	1	1	1	1	1
826497	2	2	1	7	1	4	4	3	1	1	2	1	1	1	1	1	5	5	5	5	5	5	5	5	5	5	4	1	1	1	1	1	1	1	1	3	1	1	1	1	4	1	1	1	1	1	1	1	1
826868	3	13	1	6	1	4	3	3	1	1	1	1	1	1	1	2	5	5	5	5	4	5	3	5	5	5	4	1	1	1	1	1	1	1	1	1	1	1	1	1	1	1	1	1	1	1	1	1	1
827144	2	12	5	5	1	4	5	5	1	4	4	1	1	2	2	2	5	5	5	5	4	4	4	5	5	4	5	4	5	5	5	5	5	5	5	3	1	1	1	1	1	1	1	1	1	1	1	1	1
828052	3	2	2	6	1	4	4	4	1	2	3	1	1	1	1	1	5	5	5	5	5	5	5	5	5	5	1	1	1	1	1	1	1	1	1	1	1	1	1	1	1	1	1	1	1	1	1	1	1
828058	3	2	1	3	1	4	4	2	2	2	2	2	2	1	1	3	5	5	5	5	5	5	5	5	5	5	2	1	1	1	1	1	1	1	1	3	1	1	1	1	1	1	1	1	1	1	1	1	1
828514	2	12	1	5	1	4	4	4	4	3	4	3	4	3	3	3	2	4	2	2	2	4	3	2	2	2	5	1	1	1	1	1	1	1	1	1	1	1	1	1	1	1	1	1	1	1	1	1	1
828930	2	13	2	5	1	4	4	4	3	3	3	2	2	1	1	1	5	5	5	5	5	5	5	5	5	5	2	1	1	1	1	1	1	1	1	3	1	1	1	1	1	1	1	1	1	1	1	1	1
829066	2	5	1	6	1	4	4	4	1	3	1	1	1	1	1	2	5	4	4	3	5	5	5	5	5	5	5	2	1	1	1	1	1	1	1	3	1	1	1	1	1	1	1	1	1	1	1	2	1
829657	2	12	1	3	1	4	4	3	1	2	2	1	1	1	1	2	5	5	5	5	5	5	5	5	5	5	1	1	1	1	1	1	1	1	1	5	1	1	1	1	1	1	1	1	1	1	1	1	1
829763	2	11	1	7	1	4	4	4	1	3	2	1	1	1	1	2	5	5	5	5	5	5	4	5	5	5	4	1	1	1	1	1	1	1	1	3	1	1	1	1	1	1	1	1	1	1	1	1	1
829792	2	7	1	7	1	4	2	3	1	3	1	1	1	1	1	1	4	5	5	4	4	5	4	5	5	5	4	1	1	1	1	1	1	1	1	2	1	1	1	1	1	1	1	1	1	1	1	1	1
829972	3	6	2	6	1	4	4	4	1	4	1	1	1	1	1	1	5	5	5	5	5	5	5	5	5	5	5	5	1	1	1	1	1	1	1	1	1	1	1	1	1	1	1	1	1	1	1	1	1
830239	4	11	1	6	1	4	4	5	2	4	2	2	1	1	2	2	4	5	4	3	4	4	3	4	4	4	4	2	1	1	1	1	1	1	1	3	1	1	1	1	1	1	1	1	1	1	1	2	1
830519	3	5	1	3	1	4	4	3	3	4	3	2	2	3	2	4	5	5	5	5	5	5	5	5	5	5	4	1	1	1	1	1	1	1	1	5	1	1	1	1	2	1	1	1	1	2	1	1	1
830588	1	12	3	5	1	4	5	4	3	4	4	2	2	1	1	2	5	5	5	5	4	5	5	5	5	5	1	4	1	1	1	1	1	1	1	1	1	1	1	1	1	1	1	1	1	1	1	1	1
830774	1	13	2	6	1	4	3	3	3	2	2	2	2	3	3	3	3	1	3	1	4	1	1	1	1	5	4	1	1	1	1	1	1	1	1	2	1	1	1	1	1	1	1	1	1	1	1	1	1
830894	6	5	1	2	1	4	3	3	2	3	3	2	2	1	1	2	5	5	4	4	5	4	3	4	4	5	3	5	1	1	1	1	1	1	1	5	1	1	1	1	2	1	1	1	1	2	1	2	2
831330	3	8	1	5	1	4	5	2	1	4	4	1	1	2	4	4	5	5	5	5	5	4	5	5	5	5	5	1	1	1	1	1	1	1	1	3	1	1	1	1	1	1	1	1	1	1	1	2	1
831412	2	8	1	6	1	4	2	3	2	2	2	1	2	3	1	4	5	5	5	5	5	5	5	5	5	5	2	1	1	1	1	1	1	1	1	3	1	1	1	1	1	1	1	1	1	1	1	1	1
831446	2	12	1	4	1	4	5	4	3	5	4	3	4	4	3	3	4	4	3	4	2	3	3	5	3	5	2	3	1	1	1	1	1	1	1	1	1	1	1	1	1	1	1	1	1	1	1	1	1
831530	3	2	1	7	1	4	5	4	3	4	4	4	3	3	3	3	2	4	3	2	3	4	3	3	2	2	4	4	1	1	1	1	1	1	1	5	1	5	5	1	5	1	1	1	1	1	1	2	1
832679	3	2	1	6	2	4	5	5	3	3	4	3	3	1	1	3	5	5	5	5	5	5	5	5	5	5	4	1	1	1	1	1	1	1	1	3	3	1	1	1	1	1	1	1	1	1	1	3	1
832701	3	5	1	9	1	4	4	4	1	4	2	3	2	2	3	4	5	5	3	3	4	5	4	5	5	5	5	1	1	1	1	1	1	1	1	4	2	4	1	2	4	4	1	1	2	3	3	1	1
833280	2	12	1	2	1	4	3	1	1	1	1	1	1	1	1	1	5	5	5	5	5	5	5	5	5	5	1	1	1	1	1	1	1	1	1	1	1	1	1	1	1	1	1	1	1	1	1	1	1
833449	3	13	1	6	1	4	2	4	1	3	1	1	1	1	1	2	5	5	5	5	4	5	1	5	5	5	4	3	1	1	1	1	1	1	1	2	1	1	1	1	1	1	1	1	1	1	1	1	1
833475	2	11	1	4	1	4	4	4	2	3	3	2	2	2	1	3	4	5	4	5	5	5	5	5	5	5	1	1	1	1	1	1	1	1	1	5	1	1	1	1	1	1	1	1	1	1	1	1	1
833614	2	12	1	5	1	4	3	4	2	4	1	1	1	4	1	3	2	2	3	3	3	4	4	4	4	4	2	1	1	1	1	1	1	1	1	1	1	1	1	1	1	1	1	1	1	1	1	1	1
833641	4	2	2	7	2	4	3	3	3	3	3	3	3	3	3	3	5	5	5	5	5	5	5	5	5	5	1	1	1	1	1	1	1	1	1	1	1	1	1	1	1	1	1	1	1	1	1	1	1
833643	2	5	2	3	1	4	3	3	3	3	3	3	3	3	3	3	5	5	5	5	5	5	5	5	5	5	5	1	1	1	1	1	1	1	1	2	1	1	1	1	1	1	1	1	1	1	1	1	1
833816	4	7	1	6	1	4	2	2	2	2	2	2	2	2	2	2	5	5	5	5	5	5	5	5	5	5	5	1	1	1	1	1	1	1	1	1	1	1	1	1	1	1	1	1	1	1	1	1	1
834157	5	5	1	6	1	4	5	5	1	2	5	1	1	1	1	2	5	2	5	1	2	3	3	3	3	5	2	1	1	1	1	1	1	1	1	5	1	1	1	1	1	1	1	1	1	1	1	1	1
834650	2	5	1	4	1	4	4	4	1	4	3	2	1	4	4	4	4	4	5	5	5	5	4	5	5	5	2	2	1	1	1	1	1	1	1	2	1	1	1	1	1	1	1	1	1	1	1	1	1
835031	3	2	1	6	1	4	4	4	3	3	4	3	2	2	2	2	4	5	4	5	5	5	5	5	5	5	4	1	1	1	1	1	1	1	1	1	1	1	1	1	1	1	1	1	1	1	1	1	1
835045	3	5	2	7	1	4	4	3	2	2	2	1	2	1	1	2	5	4	5	5	5	1	1	3	3	5	4	1	1	1	1	1	1	1	1	3	1	1	1	1	1	1	1	1	1	1	1	1	1
835532	3	12	3	5	1	4	4	4	3	4	4	3	3	3	3	3	5	5	5	5	5	5	5	5	5	5	5	1	1	1	1	1	1	1	1	1	1	1	1	1	1	1	1	1	1	1	1	1	1
835777	2	12	1	6	1	4	5	5	1	5	1	1	1	1	1	1	4	5	5	5	5	5	5	5	5	5	4	1	1	1	1	1	1	1	1	1	1	1	1	1	1	1	1	1	1	1	1	1	1
835942	3	10	1	6	1	4	4	4	2	3	4	2	3	1	1	2	4	4	4	5	4	5	4	5	5	5	2	1	1	1	1	1	1	1	1	1	1	1	1	1	1	1	1	1	1	1	1	1	1
836114	3	5	1	9	1	4	3	3	3	4	3	1	1	1	1	3	5	5	5	5	5	5	5	5	5	5	1	1	1	1	1	1	1	1	1	1	1	1	1	1	1	1	1	1	1	1	1	1	1
836828	1	12	5	7	1	4	4	3	1	4	3	1	1	2	2	3	5	5	4	5	5	5	5	5	5	5	2	1	1	1	1	1	1	1	1	1	1	1	1	1	1	1	1	1	1	1	1	1	1
836848	4	12	1	5	1	4	5	3	1	4	4	1	1	2	2	2	5	5	5	5	5	5	3	5	5	5	5	1	1	1	1	1	1	1	1	1	1	1	1	1	1	1	1	1	1	1	1	1	1
837626	2	5	1	4	1	4	3	3	3	3	3	3	3	4	4	4	5	5	5	5	5	5	5	5	5	5	4	1	1	1	1	1	1	1	1	2	1	1	1	1	1	1	1	1	1	1	1	2	1
837855	2	12	1	3	1	4	3	2	1	2	2	1	1	1	1	1	5	5	5	5	5	5	4	5	5	5	2	5	1	1	1	1	1	1	1	1	1	1	1	1	1	1	1	1	1	1	1	1	1
838496	3	8	1	3	2	4	3	3	2	1	1	1	1	1	3	1	4	3	3	3	3	4	2	5	5	5	5	5	1	1	1	1	1	1	1	3	1	1	1	1	1	1	1	1	1	1	1	1	1
838574	3	12	1	3	1	4	2	1	1	1	2	1	1	1	1	2	5	5	5	5	5	5	2	5	5	5	2	1	1	1	1	1	1	1	1	3	1	1	1	1	1	1	1	1	1	1	1	1	1
838825	2	8	1	6	1	4	3	3	3	3	3	3	3	3	3	3	3	3	3	3	3	3	3	3	3	3	1	1	1	1	1	1	1	1	1	1	1	1	1	1	1	1	1	1	1	1	1	1	1
838903	1	13	2	6	1	4	5	1	1	5	1	1	1	1	1	5	5	5	5	5	5	5	5	5	5	5	5	1	1	1	1	1	1	1	1	3	3	1	1	1	1	1	1	1	1	1	1	3	1
838916	1	12	5	5	1	4	3	3	2	2	2	2	2	2	2	2	5	5	5	5	5	5	5	5	5	5	1	1	1	1	1	1	1	1	1	1	1	1	1	1	1	1	1	1	1	1	1	1	1
838926	2	13	2	6	1	4	4	4	2	3	3	2	2	3	2	2	5	5	5	5	3	5	2	4	4	4	5	1	1	1	1	1	1	1	1	5	1	3	1	1	1	1	1	1	1	3	1	1	1
838993	2	5	1	6	1	4	3	3	3	3	3	3	3	3	3	3	5	5	5	5	5	5	5	5	5	5	1	1	1	1	1	1	1	1	1	5	1	1	1	1	1	1	1	1	1	1	1	1	1
839400	1	7	5	7	2	4	4	3	2	2	2	2	2	2	2	2	3	4	4	4	4	4	5	5	5	5	4	5	1	1	1	1	1	1	1	1	1	1	1	1	1	1	1	1	1	1	1	1	1
839962	4	4	1	2	1	4	4	4	4	4	4	4	4	4	4	4	3	4	4	3	3	4	4	3	3	3	5	1	1	1	1	1	1	1	1	1	1	1	1	1	1	1	1	1	1	1	1	1	1
840480	4	5	1	3	1	4	4	4	4	4	4	4	4	4	4	4	5	5	5	5	5	5	5	5	5	5	1	1	1	1	1	1	1	1	1	1	1	1	1	1	1	1	1	1	1	1	1	1	1
840556	1	2	4	2	1	4	3	4	3	3	3	3	3	3	3	3	3	2	2	3	3	3	3	4	3	3	5	5	1	1	1	1	1	1	1	1	1	1	1	1	1	1	1	1	1	1	1	1	1
841216	3	7	1	4	1	4	1	1	1	1	1	1	1	1	1	1	5	5	5	5	5	5	5	5	5	5	5	1	1	1	1	1	1	1	1	4	1	3	2	1	1	1	1	1	1	1	1	2	5
841438	2	12	1	5	1	4	2	3	3	3	2	2	2	2	2	2	5	5	5	5	5	5	5	5	5	5	1	1	1	1	1	1	1	1	1	1	1	1	1	1	1	1	1	1	1	1	1	1	1
841445	2	5	1	4	1	4	3	3	3	3	3	3	3	3	3	3	5	5	5	5	5	5	5	5	5	5	5	1	1	1	1	1	1	1	1	3	1	1	1	1	1	1	1	1	1	1	1	1	1
841493	3	5	1	4	1	4	5	4	2	3	3	2	2	1	3	4	4	4	5	3	3	4	4	5	5	5	4	5	3	1	4	4	1	1	1	3	1	1	1	1	1	1	1	1	1	1	1	1	1
841588	2	5	2	7	1	4	4	4	1	3	4	1	1	3	3	3	4	5	4	4	3	4	4	4	4	5	4	2	1	1	1	1	1	1	1	1	1	1	1	1	1	1	1	1	1	1	1	1	1
841589	4	12	1	6	1	4	3	3	1	3	3	1	1	1	1	3	5	5	5	5	5	4	1	4	4	5	1	1	1	1	1	1	1	1	1	1	1	1	1	1	1	1	1	1	1	1	1	1	1
842006	2	2	1	6	1	4	3	3	3	4	3	2	2	1	1	4	5	5	5	5	5	5	5	5	5	5	5	1	1	1	1	1	1	1	1	1	1	1	1	1	1	1	1	1	1	1	1	1	1
842070	2	12	1	3	1	4	4	4	2	4	4	2	2	2	2	2	3	5	5	5	5	5	5	5	5	5	1	1	1	1	1	1	1	1	1	1	1	1	1	1	1	1	1	1	1	1	1	1	1
842367	2	12	1	3	1	4	5	4	2	3	4	2	3	3	3	3	4	5	4	4	4	4	4	5	5	5	4	1	1	1	1	1	1	1	1	3	1	2	1	1	5	2	1	2	1	1	1	1	1
842645	4	8	1	6	1	4	4	4	1	3	1	1	1	1	1	3	5	5	5	5	5	5	5	5	5	5	2	1	1	1	1	1	1	1	1	1	1	1	1	1	1	1	1	1	1	1	1	1	1
842880	1	4	2	9	1	4	3	2	4	4	3	4	3	3	3	3	4	2	2	2	3	3	3	3	3	2	2	3	4	4	3	3	3	2	3	3	2	2	3	4	3	3	3	2	2	3	2	3	2
843874	2	8	5	3	1	4	4	4	4	4	3	2	2	2	2	3	5	5	5	5	5	5	5	5	5	5	1	1	1	1	1	1	1	1	1	3	1	1	1	1	1	1	1	1	1	1	1	1	1
844660	1	5	2	5	1	4	3	4	2	1	2	1	1	2	2	2	5	2	3	1	2	1	1	1	1	1	4	2	1	1	1	1	1	1	1	3	1	1	1	1	2	1	1	1	1	1	1	1	1
845061	1	2	5	6	1	4	1	3	3	1	1	1	1	1	1	1	5	5	5	5	5	5	5	5	5	5	1	1	1	1	1	1	1	1	1	3	2	1	1	1	1	1	1	1	1	1	1	2	1
845511	1	13	2	1	1	4	1	1	1	1	1	1	1	1	1	1	5	5	5	5	5	5	5	5	5	5	1	1	1	1	1	1	1	1	1	1	1	1	1	1	1	1	1	1	1	1	1	1	1
846397	1	5	2	8	1	4	1	5	1	1	1	1	1	5	1	1	5	5	5	5	5	5	5	5	5	5	4	1	1	1	1	1	1	1	1	1	1	1	1	1	1	1	1	1	1	1	1	1	1
852570	3	2	2	6	1	4	3	4	1	2	2	2	2	3	1	3	4	4	3	4	3	3	5	3	4	5	2	5	1	4	1	1	1	1	1	5	2	4	4	1	1	1	1	1	1	2	1	2	2
854723	3	5	1	6	1	4	3	3	2	3	3	2	2	3	2	2	4	5	5	5	5	4	2	5	4	5	2	1	1	1	1	1	1	1	1	3	2	1	1	1	1	1	1	1	2	1	1	2	1
855176	2	8	1	7	1	4	4	4	2	3	3	3	1	1	1	1	5	5	5	5	5	5	4	5	4	5	2	1	1	1	1	1	1	1	1	1	1	1	1	1	1	1	1	1	1	1	1	1	1
857489	3	12	1	2	1	4	4	4	3	4	3	2	2	3	3	3	5	5	5	5	5	5	5	5	5	5	4	1	1	1	1	1	1	1	1	1	1	1	1	1	1	1	1	1	1	1	1	1	1
857529	3	7	1	3	1	4	5	3	1	5	3	1	1	1	1	2	5	5	5	5	5	5	5	5	5	5	2	2	1	1	1	1	1	1	1	3	1	3	5	1	1	1	1	1	2	2	1	1	1
858584	2	8	5	9	1	4	4	4	3	4	4	3	3	4	4	4	3	3	3	3	3	3	3	2	3	3	1	1	1	1	1	1	1	1	1	1	1	1	1	1	1	1	1	1	1	1	1	1	1
859372	2	4	1	7	1	4	4	4	1	2	3	2	1	1	1	4	5	5	5	5	4	5	4	5	5	5	1	2	1	1	1	1	1	1	1	5	1	1	1	1	1	1	1	1	1	1	1	2	1
859699	3	5	2	6	1	4	3	3	3	2	1	1	2	4	4	4	2	2	2	2	2	2	1	2	2	2	4	1	1	1	1	1	1	1	1	1	1	1	1	1	1	1	1	1	1	1	1	1	1
859729	5	4	1	6	1	4	3	4	2	2	2	2	2	2	2	2	2	1	1	2	2	1	1	1	1	1	2	1	2	2	2	2	2	2	2	1	1	1	1	1	1	1	1	1	1	1	1	1	1
859848	1	5	5	4	1	4	4	3	2	4	4	2	2	4	3	3	3	4	3	4	4	3	5	5	5	5	3	1	1	1	1	1	1	1	1	1	1	1	1	1	1	1	1	1	1	1	1	1	1
861049	4	5	2	6	1	4	3	1	1	2	2	1	1	1	1	1	5	5	5	5	5	5	5	5	5	5	2	1	1	1	1	1	1	1	1	1	1	1	1	1	1	1	1	1	1	1	1	1	1
861943	3	13	2	4	1	4	4	5	1	2	5	1	1	1	1	1	5	3	5	3	4	3	3	4	4	5	2	1	1	1	1	1	1	1	1	1	1	1	1	1	1	1	1	1	1	1	1	1	1
863052	2	8	5	6	1	4	5	4	2	4	3	2	3	2	2	2	4	5	5	5	5	5	5	5	5	5	1	1	1	1	1	1	1	1	1	1	1	1	1	1	1	1	1	1	1	1	1	1	1
863458	4	2	1	7	1	4	5	4	1	4	3	1	1	4	1	4	5	5	5	5	5	5	5	5	5	5	2	1	1	1	1	1	1	1	1	5	1	1	1	1	1	1	1	1	1	1	1	1	1
864382	2	5	1	4	1	4	4	3	1	1	1	1	1	1	1	1	5	5	5	5	5	5	5	5	5	5	5	3	1	1	1	1	1	1	1	5	1	2	1	1	1	1	1	1	1	1	1	1	1
864757	3	12	5	2	1	4	4	3	2	3	2	2	2	3	3	3	3	5	5	5	5	5	3	5	5	5	5	1	1	1	1	1	1	1	1	5	1	1	1	1	1	1	1	1	1	1	1	1	1
865692	2	4	1	6	1	4	3	5	2	2	2	2	2	2	2	2	5	5	5	5	5	5	5	5	5	5	4	1	1	1	1	1	1	1	1	5	1	4	1	1	1	4	1	1	1	1	1	1	1
866572	2	11	3	2	1	4	3	3	1	3	1	1	1	1	1	2	5	5	5	5	5	5	4	5	5	5	5	5	1	1	1	1	1	1	1	5	1	1	1	1	1	1	1	1	1	1	1	1	1
867260	1	13	2	6	1	4	5	5	3	4	4	2	1	1	1	1	5	5	5	5	5	5	5	5	5	5	4	1	1	1	1	1	1	1	1	1	1	1	1	1	1	1	1	1	1	1	1	1	1
869464	4	5	1	5	1	4	3	2	1	3	1	1	1	1	1	5	5	5	5	5	5	2	5	5	5	5	2	1	1	1	1	1	1	1	1	1	1	1	1	1	1	1	1	1	1	1	1	1	1
870332	3	7	1	3	2	4	3	3	3	3	3	3	3	3	3	3	3	5	4	4	4	5	5	5	5	5	2	1	1	1	1	1	1	1	1	2	1	1	1	1	1	1	1	1	1	1	1	1	1
870630	1	5	2	7	1	4	2	2	2	2	2	2	2	2	1	1	5	5	5	5	5	5	5	5	5	5	2	1	1	1	1	1	1	1	1	1	1	1	1	1	1	1	1	1	1	1	1	1	1
870798	2	12	1	6	1	4	3	2	1	1	1	1	1	1	1	2	5	5	5	5	5	5	5	5	5	5	5	1	1	1	1	1	1	1	1	1	1	1	1	1	1	1	1	1	1	1	1	1	1
870842	4	4	1	6	1	4	2	5	1	1	2	1	1	4	1	4	3	4	3	3	5	3	3	4	3	5	5	2	1	1	1	1	1	1	1	2	1	1	1	1	1	1	1	1	1	1	1	1	1
871722	3	4	1	6	1	4	5	5	1	3	3	1	1	1	1	1	5	5	5	5	5	5	4	5	5	4	4	1	1	1	1	1	1	1	1	1	1	1	1	1	1	1	1	1	1	1	1	1	1
872010	3	5	1	6	1	4	2	4	1	1	2	2	2	1	1	1	5	5	5	5	5	5	5	5	5	5	4	1	1	1	1	1	1	1	1	1	1	1	1	1	1	1	1	1	1	1	1	1	1
873068	2	6	5	7	2	4	1	4	5	5	1	1	1	1	1	1	5	5	5	5	5	5	5	5	5	5	4	2	1	1	1	1	1	1	1	3	1	1	1	1	1	1	1	1	1	1	1	1	1
873489	1	5	2	2	1	4	4	4	1	3	2	1	1	2	2	3	5	5	5	5	5	5	5	5	5	5	4	2	1	1	1	1	1	1	1	5	2	4	4	4	2	2	1	1	1	1	1	1	1
874257	2	12	3	3	1	4	5	3	1	5	2	2	2	4	4	4	4	5	5	5	5	5	5	5	5	5	1	1	1	1	1	1	1	1	1	1	1	1	1	1	1	1	1	1	1	1	1	1	1
874617	2	2	1	6	1	4	4	2	2	2	2	2	2	2	2	2	5	5	5	5	5	5	5	5	5	5	2	1	1	1	1	1	1	1	1	3	1	1	1	1	1	1	1	1	1	1	1	1	1
876290	4	4	1	7	1	4	4	2	2	3	2	2	2	2	3	3	5	5	5	5	5	5	5	5	5	5	5	1	1	1	1	1	1	1	1	1	1	1	1	1	1	1	1	1	1	1	1	1	1
876710	4	5	1	4	1	4	3	4	1	2	2	2	1	3	3	2	5	5	5	5	5	4	1	5	5	5	5	1	1	1	1	1	1	1	1	5	1	1	1	1	4	1	1	1	1	4	1	1	1
879102	4	4	1	3	1	4	5	4	1	4	4	2	2	4	1	4	5	5	5	5	3	3	5	3	5	5	5	5	5	5	5	5	5	5	5	5	1	4	4	1	1	4	1	1	1	1	1	1	5
879485	5	8	1	4	1	4	4	4	3	3	3	3	3	3	3	3	3	3	3	2	3	3	3	3	3	3	1	1	1	1	1	1	1	1	1	1	1	1	1	1	1	1	1	1	1	1	1	1	1
879517	3	5	2	3	1	4	4	3	3	4	3	2	2	4	4	4	3	4	3	3	3	3	3	4	4	4	1	1	1	1	1	1	1	1	1	1	1	1	1	1	1	1	1	1	1	1	1	1	1
880394	3	4	2	4	1	4	5	4	1	3	4	1	1	1	1	1	4	5	5	3	4	5	2	5	5	5	5	1	1	1	1	1	1	1	1	5	1	1	1	1	1	1	1	1	1	1	1	1	1
880721	1	13	3	4	1	4	1	1	1	1	1	1	1	1	1	1	5	5	5	5	5	5	5	5	5	5	4	1	1	1	1	1	1	1	1	1	1	1	1	1	1	1	1	1	1	1	1	1	1
880798	1	5	2	3	1	4	5	5	2	3	4	3	3	1	1	2	5	5	5	5	5	5	5	5	5	5	5	4	1	1	1	1	1	1	1	3	1	2	2	1	1	1	1	1	1	1	1	1	5
881229	2	12	1	3	2	4	4	3	2	3	3	2	2	2	2	2	5	5	5	4	5	4	2	3	3	3	4	1	1	1	1	1	1	1	1	5	1	1	1	1	2	1	1	1	1	1	1	1	1
881837	3	5	2	4	1	4	1	1	1	1	1	1	1	1	1	1	5	5	5	5	5	5	5	5	5	5	2	1	1	1	1	1	1	1	1	1	1	1	1	1	1	1	1	1	1	1	1	1	1
882102	2	13	1	6	1	4	2	5	1	1	1	1	1	1	1	1	5	5	4	4	5	5	5	5	5	4	4	1	1	1	1	1	1	1	1	3	3	1	1	1	1	1	1	1	1	1	1	1	1
883339	2	1	1	3	1	4	3	2	1	2	2	1	1	1	1	1	5	5	5	5	5	5	4	5	5	5	5	1	1	1	1	1	1	1	1	3	1	1	1	1	1	1	1	1	1	1	1	1	1
884160	1	5	3	5	1	4	4	4	2	4	4	2	2	1	1	3	4	3	5	3	3	3	3	5	4	5	2	2	1	1	1	1	1	1	1	1	1	1	1	1	1	1	1	1	1	1	1	1	1
884378	2	5	1	6	1	4	4	3	3	3	3	3	3	3	3	3	5	5	5	5	5	3	5	5	5	5	1	1	1	1	1	1	1	1	1	1	1	1	1	1	1	1	1	1	1	1	1	1	1
884767	1	13	2	3	1	4	2	3	4	3	2	3	4	3	2	3	5	5	5	5	5	5	5	5	5	5	1	1	1	1	1	1	1	1	1	1	1	1	1	1	1	1	1	1	1	1	1	1	1
884789	3	6	2	3	1	4	3	5	1	2	2	1	1	1	1	1	5	5	5	5	5	5	5	5	5	5	4	1	1	1	1	1	1	1	1	3	1	1	1	1	1	1	1	1	1	1	1	2	2
886170	1	7	2	3	1	4	4	2	2	2	3	1	2	3	3	3	5	5	5	5	5	4	4	5	5	5	2	1	1	1	1	1	1	1	1	1	1	1	1	1	1	1	1	1	1	1	1	1	1
886399	2	12	1	7	1	4	4	3	2	3	2	2	1	1	1	1	5	5	5	5	5	5	5	5	5	5	2	1	1	1	1	1	1	1	1	1	1	1	1	1	1	1	1	1	1	1	1	1	1
886588	2	12	1	3	1	4	3	3	3	3	3	2	2	3	3	3	4	5	3	5	5	5	4	4	4	4	4	1	1	1	1	1	1	1	1	1	1	1	1	1	1	1	1	1	1	1	1	1	1
886712	2	13	1	6	1	4	4	4	1	4	1	1	1	1	1	3	5	5	5	5	5	5	5	5	5	5	1	1	1	1	1	1	1	1	1	3	1	1	1	1	1	1	1	1	1	1	1	1	1
886714	4	12	1	4	1	4	4	4	1	1	1	1	1	1	1	1	5	5	5	5	5	5	5	5	5	5	2	1	1	1	1	1	1	1	1	1	1	1	1	1	1	1	1	1	1	1	1	1	1
886970	1	5	2	5	1	4	3	4	1	1	2	1	1	1	2	1	5	5	5	3	4	4	2	5	5	5	5	4	1	1	1	1	1	1	1	3	1	1	1	1	1	1	1	1	1	1	1	1	1
887485	2	5	1	4	1	4	4	4	1	3	3	1	1	1	1	1	5	5	5	5	5	5	5	5	5	5	5	1	1	1	1	1	1	1	1	3	1	3	1	1	5	4	1	1	1	1	1	1	1
887556	4	4	1	7	1	4	3	3	2	3	3	2	2	3	3	3	5	5	5	5	5	5	5	5	5	5	5	1	1	1	1	1	1	1	1	3	1	3	5	1	1	1	1	1	1	1	1	1	1
888025	3	2	1	6	1	4	1	1	1	1	1	1	1	1	1	1	5	5	5	5	5	5	5	5	5	5	4	1	1	1	1	1	1	1	1	1	1	1	1	1	1	1	1	1	1	1	1	1	1
888422	1	5	2	4	1	4	3	3	2	4	2	2	2	3	3	4	5	5	5	5	5	5	5	5	5	5	1	1	1	1	1	1	1	1	1	1	1	1	1	1	1	1	1	1	1	1	1	1	1
888554	1	1	1	9	1	4	4	4	2	3	4	2	2	2	2	2	4	5	5	4	5	5	5	5	5	5	4	1	1	1	1	1	1	1	1	3	1	1	1	1	1	1	1	1	1	1	1	1	1
889226	4	12	1	6	1	4	2	4	1	1	2	1	1	1	1	1	5	4	5	5	3	4	2	4	5	5	4	1	1	1	1	1	1	1	1	1	1	1	1	1	1	1	1	1	1	1	1	1	1
889348	3	12	1	5	1	4	4	4	1	2	2	1	1	2	2	2	5	5	5	5	5	5	5	5	5	5	1	1	1	1	1	1	1	1	1	1	1	1	1	1	1	1	1	1	1	1	1	1	1
889379	5	2	1	4	1	4	4	2	1	4	2	1	1	5	5	4	5	5	5	5	5	5	5	5	5	5	4	1	1	1	1	1	1	1	1	3	1	1	1	1	1	1	1	1	1	1	1	2	1
889410	1	2	2	6	1	4	3	3	3	3	3	1	3	3	3	3	5	5	5	5	5	5	5	5	5	5	1	1	1	1	1	1	1	1	1	5	1	1	1	1	1	1	1	1	1	1	1	1	1
889737	5	8	1	3	1	4	4	3	2	3	2	2	2	2	1	2	5	5	5	5	5	5	5	5	5	5	2	1	1	1	1	1	1	1	1	1	1	1	1	1	1	1	1	1	1	1	1	1	1
890456	2	5	1	6	1	4	3	3	1	3	3	3	3	3	3	3	5	5	5	5	5	5	5	5	5	5	5	1	1	1	1	1	1	1	1	1	1	1	1	1	1	1	1	1	1	1	1	1	1
891499	2	12	1	6	1	4	4	4	3	3	3	3	3	3	3	3	5	5	5	5	5	5	5	5	5	5	1	1	1	1	1	1	1	1	1	5	1	1	5	1	1	1	1	1	1	1	1	1	1
892167	2	5	1	6	1	4	3	3	3	3	2	2	2	3	1	4	5	4	5	4	5	5	5	5	5	5	1	1	1	1	1	1	1	1	1	1	1	1	1	1	1	1	1	1	1	1	1	1	1
893423	3	2	1	7	1	4	4	2	1	2	1	1	1	1	1	3	5	5	5	5	5	5	5	5	5	5	4	1	1	1	1	1	1	1	1	3	1	1	1	1	1	1	1	1	1	1	1	1	1
893764	6	1	1	5	1	4	5	4	3	4	3	2	2	2	2	2	5	5	5	5	5	5	5	5	5	5	2	2	1	1	1	1	1	1	1	1	1	1	1	1	1	1	1	1	1	1	1	1	1
894277	1	13	3	3	1	4	5	5	1	1	1	1	1	1	1	1	4	5	5	4	4	4	5	5	5	5	1	1	1	1	1	1	1	1	1	5	1	1	1	1	1	1	1	1	1	1	1	1	1
894806	3	8	1	6	1	4	5	5	3	4	4	3	2	4	3	4	3	3	3	3	3	3	3	3	3	3	2	1	1	1	1	1	1	1	1	1	1	1	1	1	1	1	1	1	1	1	1	1	1
896175	1	13	2	6	1	4	4	1	1	1	1	1	1	2	2	2	5	5	5	5	5	5	5	5	5	5	2	1	1	1	1	1	1	1	1	3	1	1	1	1	1	1	1	1	1	1	1	1	1
896270	1	13	5	6	1	4	5	4	1	5	2	1	1	1	1	3	4	5	5	4	5	5	5	5	5	5	5	1	1	1	1	1	1	1	1	1	1	1	1	1	1	1	1	1	1	1	1	1	1
896445	2	4	2	7	1	4	5	3	3	5	5	2	2	2	2	4	3	4	4	4	2	2	2	2	2	2	5	3	1	1	1	1	1	1	1	1	1	1	1	1	1	1	1	1	1	1	1	1	1
896819	3	2	1	2	1	4	2	2	1	1	1	1	1	1	1	1	5	5	5	5	5	5	5	5	5	5	2	2	1	1	1	1	1	1	1	3	1	1	1	1	1	1	1	1	1	1	1	1	1
897227	2	12	1	5	1	4	5	4	2	4	4	1	1	1	1	3	5	5	5	5	5	5	5	5	5	5	4	1	1	1	1	1	1	1	1	1	1	1	1	1	1	1	1	1	1	1	1	1	1
897233	2	11	2	7	2	4	4	4	1	4	3	1	1	1	1	1	5	5	5	5	5	5	5	5	5	5	2	1	1	1	1	1	1	1	1	1	1	1	1	1	1	1	1	1	1	1	1	1	1
897438	2	5	6	4	1	4	1	1	1	1	1	1	1	1	1	1	2	2	2	2	2	2	2	2	2	2	4	1	1	1	1	1	1	1	1	1	1	1	1	1	1	1	1	1	1	1	1	1	1
897559	1	6	1	6	1	4	4	1	1	4	4	1	1	3	3	3	5	5	5	5	5	5	5	5	5	5	1	1	1	1	1	1	1	1	1	1	1	1	1	1	1	1	1	1	1	1	1	1	1
897961	2	13	1	6	1	4	4	3	2	3	4	1	1	1	1	1	4	5	5	2	4	3	4	4	4	4	2	1	1	1	1	1	1	1	1	5	1	1	1	1	1	1	1	1	1	1	1	1	1
898182	2	8	2	3	1	4	4	3	1	1	1	1	1	2	1	1	4	5	5	5	5	5	5	5	5	5	4	1	1	1	1	1	1	1	1	2	1	1	1	1	1	1	1	1	1	1	1	1	1
898517	2	13	2	7	1	4	4	3	3	3	3	3	3	3	3	4	5	5	5	5	5	5	5	5	5	5	1	1	1	1	1	1	1	1	1	5	1	1	1	1	1	1	1	1	1	1	1	1	1
899189	2	5	1	5	1	4	3	3	1	1	3	1	1	1	1	1	5	5	5	5	5	5	5	5	5	5	1	1	1	1	1	1	1	1	1	1	1	1	1	1	1	1	1	1	1	1	1	1	1
900138	1	8	2	3	1	4	5	5	3	3	4	3	3	3	3	3	1	2	2	2	2	2	3	2	2	2	2	5	1	1	1	1	1	1	1	3	1	2	2	1	5	1	1	1	1	1	1	1	1
901849	3	5	1	3	1	4	3	3	3	3	3	3	3	3	3	3	3	3	3	3	3	3	3	3	3	3	4	1	1	1	1	1	1	1	1	3	1	1	1	1	1	1	1	1	1	1	1	1	1
901913	2	1	1	6	1	4	2	4	1	2	2	2	1	2	1	2	5	5	5	5	5	5	5	5	5	5	4	1	1	1	1	1	1	1	1	3	1	1	1	1	1	5	1	1	1	1	1	1	1
902138	2	2	1	7	1	4	5	4	2	3	4	3	3	3	3	3	4	5	5	5	5	5	5	5	5	5	5	5	1	1	1	1	1	1	1	3	3	2	1	1	1	1	1	1	2	2	1	2	1
902214	2	12	1	4	1	4	3	3	3	3	2	2	2	2	2	2	5	5	5	5	5	5	5	5	5	5	2	1	1	1	1	1	1	1	1	1	1	1	1	1	1	1	1	1	1	1	1	1	1
903722	2	7	1	3	1	4	3	5	2	4	4	2	3	5	4	4	5	5	5	5	5	5	3	5	4	5	5	2	1	1	1	1	1	1	1	2	1	1	1	1	1	1	1	1	1	1	1	1	1
904311	1	4	2	6	1	4	1	1	1	1	1	1	1	1	1	1	5	5	5	5	5	5	5	5	5	5	4	5	5	5	5	4	4	4	4	1	1	1	1	1	1	1	1	1	1	1	2	2	5
905214	3	5	1	7	1	4	4	4	3	3	3	2	2	1	1	2	3	5	3	5	5	5	5	5	5	5	2	1	1	1	1	1	1	1	1	1	1	1	1	1	1	1	1	1	1	1	1	1	1
905621	5	11	1	6	1	4	5	5	4	5	4	1	1	2	2	2	5	5	5	5	5	5	5	5	5	5	1	1	1	1	1	1	1	1	1	1	1	1	1	1	1	1	1	1	1	1	1	1	1
905710	1	5	1	9	1	4	5	1	1	5	3	1	1	5	5	5	5	5	5	5	5	5	5	5	5	5	2	5	1	1	1	1	1	1	1	2	1	1	1	1	1	1	1	1	1	1	1	1	1
906195	3	5	2	4	1	4	5	5	3	4	3	1	1	1	1	4	4	3	4	2	2	1	1	2	2	3	4	1	1	1	1	1	1	1	1	1	1	1	1	1	1	1	1	1	1	1	1	1	1
906550	2	13	1	3	1	4	3	4	2	2	2	2	2	2	2	2	4	5	4	5	5	5	5	5	5	5	1	1	1	1	1	1	1	1	1	2	1	1	1	1	1	1	1	1	1	1	1	1	1
906909	2	13	1	6	1	4	3	4	1	3	2	1	1	1	1	2	5	5	5	5	5	5	5	5	5	5	1	1	1	1	1	1	1	1	1	3	1	5	5	4	3	1	1	1	1	1	1	1	5
907357	1	13	2	5	2	4	3	2	1	3	4	2	1	1	1	3	4	5	4	4	5	5	5	4	4	4	2	1	1	1	1	1	1	1	1	2	1	1	1	1	1	1	1	1	1	1	1	1	1
908670	2	12	1	7	1	4	4	4	3	3	3	3	3	2	4	3	4	5	5	5	5	5	5	5	5	5	4	5	5	5	5	5	5	5	5	1	1	1	1	1	1	1	1	1	1	1	1	1	1
908890	4	5	1	7	1	4	4	4	1	1	1	1	1	1	1	2	5	5	5	5	5	5	5	5	5	5	2	1	1	1	1	1	1	1	1	1	1	1	1	1	1	1	1	1	1	1	1	1	1
909374	1	4	5	4	1	4	3	3	3	3	3	3	3	5	3	5	3	3	4	4	2	3	3	3	3	3	2	2	1	1	1	1	1	1	1	1	1	1	1	1	1	1	1	1	1	1	1	1	1
909434	1	13	3	6	1	4	2	4	2	2	3	2	2	3	3	4	5	5	5	5	5	5	5	5	5	5	1	1	1	1	1	1	1	1	1	3	1	1	1	1	1	1	1	1	1	1	1	1	1
910002	2	7	1	6	1	4	4	3	1	3	2	1	1	1	1	1	5	5	5	5	5	5	4	5	4	4	5	1	1	1	1	1	1	1	1	3	1	1	1	1	1	1	1	1	1	1	1	1	1
910332	2	3	1	5	1	4	4	4	3	3	3	3	3	3	3	3	2	3	4	3	2	5	5	5	5	5	5	2	1	1	1	1	1	1	1	3	1	1	1	1	1	1	1	1	1	1	1	1	1
910480	4	5	5	3	1	4	5	4	3	5	5	3	3	3	3	3	5	5	5	5	5	5	5	5	5	5	2	1	1	1	1	1	1	1	1	2	1	1	1	1	1	1	1	1	1	1	1	1	1
911890	2	13	1	6	1	4	2	2	2	2	2	2	2	2	2	2	5	5	5	5	5	5	5	5	5	5	5	1	1	1	1	1	1	1	1	5	1	1	1	1	1	1	1	1	1	1	1	1	1
912120	3	5	1	7	1	4	3	3	1	2	4	1	1	1	1	1	5	5	5	5	5	5	4	5	5	5	2	1	1	1	1	1	1	1	1	1	1	1	1	1	1	1	1	1	1	1	1	1	1
912169	1	6	2	6	1	4	4	2	2	2	2	2	2	2	2	2	4	2	3	3	3	2	1	2	2	5	4	1	1	1	1	1	1	1	1	2	1	1	1	1	1	1	1	1	1	1	1	1	1
912956	4	7	1	3	1	4	4	3	2	1	2	1	1	1	1	1	5	5	5	5	5	5	5	5	5	5	5	1	1	1	1	1	1	1	1	3	1	1	1	1	1	1	1	1	1	1	1	1	1
913128	3	13	2	5	1	4	2	2	1	2	1	1	1	5	1	2	5	5	5	5	5	5	2	5	5	5	1	1	1	1	1	1	1	1	1	1	1	1	1	1	1	1	1	1	1	1	1	1	1
913600	3	12	1	6	1	4	5	5	3	3	4	2	3	2	2	2	1	3	3	2	2	3	1	3	2	1	2	5	1	1	1	1	1	1	1	2	2	2	1	1	1	1	1	1	1	1	1	1	1
913916	2	4	2	6	1	4	3	3	3	4	3	3	3	3	4	2	5	5	5	5	5	5	5	5	5	5	4	1	1	1	1	1	1	1	1	5	1	1	1	1	1	1	1	1	1	1	1	1	1
914313	3	2	1	6	1	4	4	5	1	3	3	1	1	4	2	3	5	5	5	5	5	5	5	5	5	5	5	1	1	1	1	1	1	1	1	5	1	1	1	1	1	1	1	1	2	1	1	1	1
915633	2	4	1	6	1	4	5	4	3	4	4	2	2	2	2	5	4	5	4	4	5	4	4	4	4	4	5	2	1	1	1	1	1	1	1	5	1	4	1	1	1	1	1	1	1	1	1	1	1
916003	4	5	1	6	1	4	2	4	1	1	1	1	1	1	1	2	5	5	5	5	5	5	5	5	5	5	4	1	1	1	1	1	1	1	1	2	1	1	1	1	1	1	1	1	1	1	1	1	1
917076	1	5	1	2	1	4	4	3	1	2	1	1	1	4	3	2	5	5	5	5	5	5	5	5	5	5	5	1	1	1	1	1	1	1	1	3	1	4	1	1	5	4	4	1	1	1	1	1	1
917369	1	9	2	6	2	4	2	2	2	2	2	2	2	2	2	2	5	5	5	5	5	5	5	5	5	5	4	2	1	1	1	1	1	1	1	2	1	1	1	1	1	1	1	1	1	1	1	1	1
917767	2	13	1	9	1	4	5	5	2	2	4	3	2	1	1	2	4	4	4	4	4	4	4	5	4	4	2	5	1	1	1	1	1	1	1	1	1	1	1	1	1	1	1	1	1	1	1	1	1
918044	3	5	1	3	1	4	5	4	2	2	3	1	1	1	1	2	4	4	4	4	4	4	3	3	3	4	4	1	1	5	1	1	1	1	1	3	1	1	1	1	1	1	1	1	1	1	1	1	1
919249	3	8	1	3	1	4	3	4	1	2	3	1	1	1	1	1	5	5	5	5	5	5	3	5	5	5	4	1	1	1	1	1	1	1	1	1	1	1	1	1	1	1	1	1	1	1	1	1	1
919738	1	13	2	4	1	4	3	3	1	1	3	1	1	1	1	1	5	5	5	5	5	5	5	5	5	5	5	1	1	1	1	1	1	1	1	3	1	1	1	1	1	1	1	1	1	1	1	1	1
919953	2	5	1	6	1	4	1	3	1	1	1	1	1	1	1	3	5	5	5	5	5	5	3	4	5	5	4	1	1	1	1	1	1	1	1	1	1	1	1	1	1	1	1	1	1	1	1	1	1
920058	1	13	2	6	1	4	2	3	4	3	3	3	3	3	3	3	5	5	5	5	5	5	5	5	5	5	5	1	1	1	1	1	1	1	1	5	1	1	1	1	1	1	1	1	1	1	1	1	1
920095	4	5	1	6	1	4	4	4	2	3	3	1	1	3	3	3	5	5	5	5	5	5	5	5	5	5	2	1	1	1	1	1	1	1	1	1	1	1	1	1	1	1	1	1	1	1	1	1	1
920367	2	12	1	3	1	4	2	3	2	2	2	2	1	1	1	1	3	3	3	3	3	2	3	3	4	5	4	5	1	1	1	1	1	1	1	5	1	1	1	1	1	1	1	1	1	1	1	1	1
920971	3	4	1	6	1	4	3	3	3	3	3	3	3	3	3	3	5	5	5	5	5	5	5	5	5	5	1	1	1	1	1	1	1	1	1	1	1	1	1	1	1	1	1	1	1	1	1	1	1
921353	2	3	1	6	1	4	4	3	1	5	2	1	1	4	3	4	4	5	5	5	4	5	2	3	3	5	2	4	1	1	1	1	1	2	1	3	2	1	1	1	1	1	1	1	1	1	1	1	1
921505	4	12	1	5	1	4	4	4	2	4	3	3	2	2	2	3	4	4	4	4	4	4	4	4	4	4	5	1	1	1	1	1	1	1	1	1	1	1	1	1	1	1	1	1	1	1	1	1	1
921618	2	8	1	6	1	4	3	4	1	1	1	1	1	3	1	2	5	5	5	5	5	5	2	4	4	5	4	3	1	1	1	1	1	1	1	3	1	1	1	1	1	1	1	1	1	1	1	1	1
922115	4	5	2	4	1	4	4	4	4	4	4	4	4	4	3	4	4	5	4	5	4	5	5	5	5	5	1	1	1	1	1	1	1	1	1	5	1	1	1	1	1	1	1	1	1	1	1	1	1
922276	2	7	1	6	1	4	5	5	5	5	3	1	1	1	3	1	5	5	5	5	5	5	5	5	5	5	5	1	1	1	1	1	1	1	1	5	1	1	1	1	1	1	1	1	1	1	1	1	1
922767	2	12	1	5	1	4	5	4	3	4	4	3	3	2	1	3	3	5	5	4	3	5	5	5	5	5	4	1	1	1	1	1	1	1	1	1	1	1	1	1	1	1	1	1	1	1	1	1	1
923393	2	12	1	7	1	4	4	4	1	3	3	1	1	1	1	4	3	5	5	5	5	5	4	5	5	5	2	1	1	1	1	1	1	1	1	1	1	1	1	1	1	1	1	1	1	1	1	1	1
923577	2	13	1	6	1	4	5	3	3	5	4	3	3	3	3	3	5	5	5	5	5	5	5	5	5	5	5	2	1	1	1	1	1	1	1	3	1	1	1	1	1	1	1	1	1	1	1	1	1
923851	4	5	1	7	1	4	4	3	2	3	2	1	1	3	3	3	5	5	3	3	3	3	4	5	5	5	2	1	1	1	1	1	1	1	1	1	1	1	1	1	1	1	1	1	1	1	1	1	1
924286	4	13	1	3	1	4	5	5	2	5	4	3	3	2	2	4	4	4	4	4	5	5	5	5	5	5	5	1	1	1	1	1	1	1	1	3	1	1	1	1	1	1	1	1	1	1	3	1	1
924937	3	5	2	8	1	4	4	4	2	3	3	1	1	1	3	3	5	5	4	5	4	3	2	2	3	4	4	1	1	1	1	1	1	1	1	5	1	1	1	1	1	5	1	1	1	1	1	1	1
925736	3	12	1	7	1	4	5	5	5	5	5	5	5	5	5	5	4	5	5	5	5	5	5	5	5	5	5	1	1	1	1	1	1	1	1	1	1	1	1	1	1	1	1	1	1	1	1	1	1
926231	3	8	1	3	1	4	4	2	1	3	2	1	2	2	2	4	3	5	5	2	3	3	1	4	4	5	4	1	1	1	1	1	1	1	1	1	1	1	1	1	1	1	1	1	1	1	1	1	1
926412	2	1	2	6	1	4	4	4	1	3	2	2	1	1	1	1	5	5	5	5	5	5	5	5	5	5	4	1	1	1	1	1	1	1	1	1	1	1	1	1	1	1	1	1	1	1	1	1	1
926431	2	11	1	3	1	4	4	4	3	4	3	3	3	3	3	3	5	5	5	5	5	5	5	5	5	5	5	1	1	1	1	1	1	1	1	1	1	1	1	1	1	1	1	1	1	1	1	1	1
926579	2	13	2	7	1	4	4	2	1	4	1	1	1	1	1	4	3	5	5	5	5	5	3	5	5	5	5	1	1	1	1	1	1	1	1	1	1	1	1	1	1	1	1	1	1	1	1	1	1
926802	4	2	1	6	1	4	4	5	2	2	2	2	2	2	2	2	5	5	5	5	5	5	5	5	5	5	4	1	1	1	1	1	1	1	1	5	1	3	4	1	4	1	1	1	1	1	1	1	1
926903	2	13	1	6	1	4	1	1	1	1	1	1	1	1	1	2	5	5	5	5	5	5	5	5	5	5	1	1	1	1	1	1	1	1	1	1	1	1	1	1	1	1	1	1	1	1	1	1	1
927157	2	12	1	4	1	4	5	4	1	4	4	1	1	1	1	3	4	4	3	4	5	5	5	5	5	5	2	1	1	1	1	1	1	1	1	3	1	1	1	1	1	1	1	1	1	1	1	1	1
927342	3	2	1	6	1	4	4	4	2	3	3	2	2	4	4	4	3	5	4	5	4	5	5	5	5	4	5	2	1	1	1	1	1	1	1	3	1	1	1	1	1	1	1	1	1	1	1	2	1
927390	2	5	1	4	1	4	5	3	1	4	3	1	1	3	3	3	3	3	3	3	3	3	3	3	3	3	4	1	1	1	1	1	1	1	1	1	1	1	1	1	1	1	1	1	1	1	1	1	1
927465	5	5	2	6	1	4	4	4	2	3	3	2	2	2	2	3	4	5	5	5	5	5	5	5	5	5	5	1	1	1	1	1	1	1	1	1	1	1	1	1	1	1	1	1	1	1	1	1	1
927945	3	5	1	6	1	4	4	4	1	3	2	1	1	1	1	2	5	5	5	5	5	5	5	5	5	5	4	1	1	1	1	1	1	1	1	3	1	1	1	1	1	1	1	1	1	1	1	1	1
929116	2	5	2	6	1	4	4	3	1	1	1	1	1	1	1	1	5	5	5	5	5	5	5	5	5	5	4	5	1	1	1	1	1	1	1	1	1	1	1	1	1	1	1	1	1	1	1	1	1
930047	3	12	1	5	1	4	4	4	2	3	2	2	2	3	3	4	5	5	5	5	5	5	4	5	4	5	1	1	1	1	1	1	1	1	1	1	1	1	1	1	1	1	1	1	1	1	1	1	1
930335	2	11	1	5	1	4	4	4	4	4	2	1	1	1	1	1	5	5	5	5	5	5	5	5	5	5	4	1	1	1	1	1	1	1	1	1	1	1	1	1	1	1	1	1	1	1	1	1	1
930350	3	11	1	9	1	4	4	4	3	4	4	2	2	4	4	4	5	5	5	5	5	5	5	5	5	5	4	1	1	1	1	1	1	1	1	1	1	1	1	1	1	1	1	1	1	1	1	1	1
931139	2	1	1	6	1	4	3	4	1	2	2	1	1	1	1	1	5	5	5	5	5	5	5	5	5	5	5	1	1	1	1	1	1	1	1	5	2	1	1	1	1	1	1	1	1	1	1	2	2
931713	3	12	1	6	1	4	5	4	1	4	3	1	1	1	1	1	4	5	5	4	3	4	4	4	4	5	5	2	2	1	1	1	1	1	1	2	1	1	1	1	1	1	1	1	1	1	1	1	1
932093	2	8	1	3	1	4	5	5	4	4	4	3	3	3	3	4	3	5	4	4	4	5	3	4	4	5	5	1	1	1	1	1	1	1	1	3	1	1	1	1	1	1	1	1	1	1	1	1	1
932094	3	8	2	6	1	4	4	4	1	3	4	2	1	4	1	4	4	2	3	2	2	1	1	1	1	2	2	1	1	1	1	1	1	1	1	1	1	1	1	1	1	1	1	1	1	1	1	1	1
933247	2	2	2	6	1	4	5	3	1	5	3	1	1	4	4	1	5	4	5	5	5	4	5	5	5	5	4	2	1	1	1	1	1	1	1	5	1	1	1	1	1	1	1	1	1	1	1	1	1
934067	2	12	1	4	1	4	5	4	2	5	4	2	2	2	2	2	4	5	4	5	4	5	4	5	5	4	5	1	1	1	1	1	1	1	1	5	2	1	1	1	1	1	1	1	1	1	1	1	1
934146	4	5	1	6	1	4	3	2	2	2	2	1	1	1	1	1	5	5	3	3	3	4	5	4	5	5	2	1	1	1	1	1	1	1	1	1	1	1	1	1	1	1	1	1	1	1	1	1	1
934355	2	13	1	6	1	4	4	2	1	3	3	1	1	2	1	2	5	5	5	5	5	5	5	5	5	5	1	1	1	1	1	1	1	1	1	1	1	1	1	1	1	1	1	1	1	1	1	1	1
935108	3	12	1	6	1	4	3	3	3	3	3	3	3	3	3	3	4	5	5	4	4	4	4	5	5	5	2	1	1	1	1	1	1	1	1	2	1	1	1	1	1	1	1	1	1	1	1	1	1
935212	1	13	5	3	1	4	3	4	2	2	2	1	1	1	2	2	5	5	5	5	5	5	5	5	5	5	5	1	1	1	1	1	1	1	1	3	1	1	1	1	1	1	1	1	1	1	1	1	1
935425	1	7	2	6	2	4	3	4	2	2	2	2	2	2	2	4	4	4	3	3	4	4	2	3	3	3	5	1	1	1	1	1	1	1	1	1	1	1	1	1	1	1	1	1	1	1	1	1	1
935907	4	5	1	7	1	4	4	4	2	3	3	2	2	1	1	2	4	5	5	5	5	5	5	5	5	5	2	1	1	1	1	1	1	1	1	3	1	1	1	1	1	1	1	1	1	1	1	1	1
936099	1	5	2	9	1	4	2	4	1	1	1	1	1	1	1	2	5	5	5	4	5	5	5	5	5	5	2	1	1	1	1	1	1	1	1	1	1	1	1	1	1	1	1	1	1	1	1	1	1
936816	3	11	1	3	1	4	4	4	3	3	3	3	3	4	3	3	5	5	5	5	5	5	5	5	5	5	5	1	1	1	1	1	1	1	1	1	1	1	1	1	1	1	1	1	1	1	1	1	1
936958	2	1	1	4	1	4	2	5	1	1	1	1	1	2	1	4	5	5	5	5	5	5	5	5	5	5	4	1	1	1	1	1	1	1	1	1	1	1	1	1	1	1	1	1	1	1	1	1	1
937267	2	13	1	2	1	4	5	5	3	4	4	2	2	1	1	1	5	5	5	3	5	3	5	5	5	5	1	1	1	1	1	1	1	1	1	3	1	1	1	1	1	1	1	1	1	1	1	1	1
937326	1	11	5	3	1	4	4	4	2	4	3	1	1	1	1	2	5	5	5	5	5	5	5	5	5	5	5	1	1	1	1	1	1	1	1	3	1	1	1	1	1	1	1	1	1	1	1	1	1
938570	3	1	2	7	1	4	3	3	3	3	3	3	3	3	3	3	5	5	5	5	5	5	5	5	5	5	2	1	1	1	1	1	1	1	1	1	1	1	1	1	1	1	1	1	1	1	1	1	1
938764	3	8	1	2	1	4	4	4	3	4	3	2	2	2	2	4	3	5	5	4	5	5	5	5	5	5	4	1	1	1	1	1	1	1	1	3	1	1	1	1	1	1	1	1	1	1	1	1	1
938960	2	12	1	6	1	4	5	3	1	2	3	3	3	3	3	3	3	3	3	3	3	3	3	3	3	3	2	1	1	1	1	1	1	1	1	1	1	1	1	1	1	1	1	1	1	1	1	1	1
938989	4	1	1	6	1	4	2	2	2	2	3	2	2	3	3	3	2	3	3	2	3	3	4	2	3	4	2	3	2	2	3	3	2	3	3	2	3	2	2	2	3	3	3	3	2	2	3	3	3
939392	2	4	1	4	1	4	4	3	2	2	3	2	2	1	1	1	5	5	4	5	5	5	4	5	5	5	1	5	1	1	1	1	1	1	1	3	1	1	1	1	5	1	1	1	1	1	1	1	1
939631	3	13	2	6	1	4	5	5	1	5	5	3	4	5	5	1	1	1	1	1	1	1	1	1	1	1	2	5	1	1	1	1	1	2	1	3	2	1	1	1	1	1	1	1	1	1	1	1	1
939672	2	2	1	3	1	4	5	5	4	1	1	1	1	1	1	1	5	5	5	5	5	5	5	5	5	5	1	1	1	1	1	1	1	1	1	1	1	1	1	1	1	1	1	1	1	1	1	1	1
940001	2	5	1	9	1	4	4	4	2	2	4	1	1	1	1	4	2	5	2	4	4	1	4	4	4	3	4	1	1	1	1	1	1	1	1	1	1	1	1	1	1	1	1	1	1	1	1	1	1
940315	4	5	1	6	1	4	4	1	1	1	1	1	1	1	1	1	5	5	5	5	5	5	5	5	5	5	1	1	1	1	1	1	1	1	1	1	1	1	1	1	1	1	1	1	1	1	1	1	1
941091	2	13	1	6	1	4	5	5	3	4	4	4	4	4	4	4	5	5	5	5	5	5	5	5	5	5	5	1	1	1	1	1	1	1	1	3	1	1	1	1	1	1	1	1	1	1	1	1	1
941381	2	5	1	3	1	4	4	3	2	4	4	1	1	3	3	4	4	5	5	5	5	5	5	5	5	5	5	1	1	1	1	1	1	1	1	5	1	2	1	1	2	2	1	1	1	1	1	1	1
941628	2	11	1	9	1	4	4	4	1	3	1	1	1	3	3	4	5	5	5	5	4	5	3	5	4	5	2	1	1	1	1	1	1	1	1	3	1	1	1	1	1	1	1	1	1	1	1	1	1
942576	4	7	1	5	1	4	5	5	3	4	3	2	2	2	2	3	4	5	4	5	4	5	4	5	5	5	2	1	1	1	1	1	1	1	1	2	1	1	1	1	1	1	1	1	1	1	1	1	1
943000	4	13	2	4	1	4	5	5	2	4	2	2	2	2	2	2	5	5	5	5	5	5	5	5	5	5	1	1	1	1	1	1	1	1	1	1	1	1	1	1	1	1	1	1	1	1	1	1	1
944108	3	5	1	6	1	4	4	4	1	1	3	1	1	1	1	1	5	5	5	5	5	5	5	5	5	5	4	1	1	1	1	1	1	1	1	1	1	1	1	1	1	1	1	1	1	1	1	1	1
944703	2	2	1	6	1	4	4	3	1	3	3	1	1	1	1	3	5	5	5	5	5	5	5	5	5	5	4	1	1	1	1	1	1	1	1	1	1	1	1	1	1	1	1	1	1	1	1	1	1
945949	4	12	1	6	1	4	4	4	2	4	2	2	2	2	2	4	3	4	3	3	3	4	3	4	4	4	4	1	1	1	1	1	1	1	1	2	1	1	1	1	1	1	1	1	1	1	1	1	1
946079	2	12	1	2	1	4	4	4	1	3	2	1	1	1	1	1	5	5	5	5	5	5	5	5	5	5	4	1	1	1	1	1	1	1	1	3	1	1	1	1	1	1	1	1	1	1	1	1	1
946108	3	4	1	6	2	4	3	5	5	5	5	4	4	3	4	4	3	3	3	4	3	3	4	5	4	4	4	1	1	1	1	1	1	1	1	1	1	1	1	1	1	1	1	1	1	1	1	1	1
946495	3	11	1	7	1	4	4	4	4	4	3	2	1	1	2	3	5	5	5	5	5	5	5	5	5	5	4	4	1	1	1	1	1	1	1	3	1	2	2	2	1	1	1	1	1	1	1	1	1
946705	2	8	2	6	1	4	2	3	1	2	2	2	2	4	3	3	5	5	5	5	5	5	5	5	5	5	2	3	1	1	1	1	1	1	1	1	1	1	1	1	1	1	1	1	1	1	1	1	1
947238	4	12	1	4	1	4	4	4	3	1	4	1	1	1	1	1	4	5	4	3	3	4	4	4	5	5	2	1	1	1	1	1	1	1	1	2	1	1	1	1	1	1	1	1	1	1	1	1	1
947389	1	4	2	9	1	4	4	3	1	1	1	1	1	1	1	2	5	5	5	5	5	5	5	5	4	5	2	1	1	1	1	1	1	1	1	1	1	1	1	1	1	1	1	1	1	1	1	1	1
947902	5	4	1	6	1	4	3	3	4	3	2	3	3	4	3	3	4	4	5	4	4	3	3	4	4	5	5	2	1	1	1	1	1	1	1	5	1	1	1	1	1	1	1	1	1	1	1	1	1
948463	4	5	2	6	1	4	1	1	1	1	1	1	1	1	1	1	5	5	5	5	5	5	5	5	5	5	1	1	1	1	1	1	1	1	1	2	1	1	1	1	1	1	1	1	1	1	1	1	1
949478	3	12	1	6	1	4	3	3	2	3	3	2	3	2	2	5	5	5	5	5	5	5	5	5	5	5	4	1	1	1	1	1	1	1	1	1	1	1	1	1	1	1	1	1	1	1	1	1	1
949850	3	11	1	4	1	4	3	3	3	3	2	2	1	2	1	3	4	5	5	5	4	5	1	3	1	3	2	1	1	1	1	1	1	1	1	1	1	1	1	1	1	1	1	1	1	1	1	1	1
950703	2	12	1	2	1	4	4	4	5	5	4	5	5	5	5	5	5	5	5	5	5	5	5	5	5	5	1	1	1	1	1	1	1	1	1	1	1	1	1	1	1	1	1	1	1	1	1	1	1
951896	2	2	1	6	1	4	5	5	1	2	2	1	1	1	1	4	5	5	5	5	5	5	5	5	5	5	1	1	1	1	1	1	1	1	1	3	1	1	1	1	1	1	1	1	1	1	1	1	1
951983	1	7	6	6	1	4	5	5	3	5	3	3	3	3	3	3	1	2	3	2	3	3	4	4	4	4	5	1	1	1	1	1	1	1	1	1	1	1	1	1	1	1	1	1	1	1	1	1	1
952041	1	5	5	9	1	4	4	4	1	2	1	1	1	1	1	1	4	5	4	4	4	4	4	5	5	5	2	1	1	1	1	1	1	2	1	3	2	1	1	1	1	1	1	1	2	2	2	2	1
952496	3	4	1	8	1	4	4	4	3	4	4	3	3	3	3	4	4	4	4	4	4	4	4	4	4	4	2	1	1	1	1	1	1	1	1	3	3	1	1	1	1	1	1	1	1	1	1	1	1
952768	2	1	1	6	1	4	4	3	1	3	3	1	1	1	1	1	5	5	5	5	5	5	5	5	5	5	1	1	1	1	1	1	1	1	1	5	1	5	5	1	1	1	1	1	1	1	1	1	1
952799	3	5	2	6	1	4	4	2	1	1	1	1	1	1	1	3	5	5	4	4	5	4	4	4	4	5	2	1	1	1	1	1	1	1	1	1	1	1	1	1	1	1	1	1	1	1	1	1	1
953797	1	5	2	6	1	4	3	3	3	3	3	3	3	3	3	3	3	3	3	3	3	3	3	3	3	3	1	1	1	1	1	1	1	1	1	5	1	1	1	1	1	1	1	1	1	1	1	1	1
954616	2	2	1	3	1	4	4	4	2	3	2	2	2	4	3	3	5	5	5	5	4	5	5	5	5	5	5	1	1	1	1	1	1	1	1	3	1	1	1	1	1	1	1	1	1	1	1	1	1
955013	2	12	1	3	1	4	5	5	4	5	4	2	2	2	2	3	3	5	5	3	4	5	3	3	3	3	5	2	1	1	1	1	1	1	1	3	1	1	1	1	1	1	1	1	1	1	1	1	1
955278	3	1	1	6	1	4	3	2	1	4	2	1	1	4	4	1	4	5	4	5	5	4	5	4	4	4	5	5	1	1	1	1	1	1	1	3	1	1	1	1	1	1	1	1	1	1	1	1	1
955417	2	5	1	3	1	4	5	5	4	5	4	3	3	3	2	4	4	4	4	4	4	4	4	3	4	5	4	1	1	1	1	1	1	1	1	3	3	1	1	1	1	1	1	1	1	1	1	2	1
957075	1	2	2	4	1	4	5	5	5	5	5	5	5	5	5	5	5	5	5	5	5	5	5	5	5	5	1	1	1	1	1	1	1	1	1	5	1	1	1	1	1	1	1	1	1	1	1	1	1
958046	2	12	1	6	1	4	4	4	2	2	2	1	1	3	1	4	4	5	5	4	5	5	5	5	5	5	4	4	1	1	1	1	1	1	1	5	1	1	1	1	1	1	1	1	1	1	1	1	1
960240	2	3	1	4	1	4	5	5	1	4	4	2	2	4	1	2	3	4	3	2	2	3	5	4	5	5	3	1	1	1	1	1	1	1	1	5	1	1	1	1	1	1	1	1	1	1	1	1	1
960411	2	5	2	5	1	4	4	3	1	4	2	2	1	1	1	2	5	5	5	5	5	5	5	5	5	5	4	1	1	1	1	1	1	1	1	5	1	1	1	1	1	1	1	1	1	1	1	1	1
961973	2	11	1	6	1	4	5	3	2	4	3	1	1	1	1	2	5	5	5	5	5	5	5	5	5	5	4	1	1	1	1	1	1	1	1	4	1	3	1	1	1	5	1	1	1	1	1	2	1
963254	4	4	1	7	1	4	4	4	4	4	4	4	4	4	4	3	3	4	4	5	5	5	5	5	5	5	4	1	1	1	1	1	1	1	1	5	1	1	1	1	1	5	1	1	1	1	1	2	1
963407	3	13	1	7	1	4	5	4	1	5	5	2	2	5	1	5	5	5	5	5	5	5	5	5	5	5	1	1	1	1	1	1	1	1	1	1	1	1	1	1	1	1	1	1	1	1	1	1	1
966065	2	8	1	8	1	4	2	4	1	2	1	1	1	1	1	2	5	5	5	5	5	5	5	5	5	5	1	1	1	1	1	1	1	1	1	3	1	1	1	1	1	1	1	1	1	1	1	1	1
967613	1	4	2	7	1	4	3	3	3	3	3	1	1	1	1	1	5	5	5	5	5	5	5	5	5	5	5	1	1	1	1	1	1	1	1	3	1	1	1	1	1	1	1	1	1	1	1	1	1
968358	1	5	2	3	1	4	3	1	1	1	1	1	1	1	1	1	5	5	5	5	5	5	5	5	5	5	4	5	5	5	5	5	5	5	5	5	1	1	1	1	1	1	1	1	1	1	1	1	1
972179	5	5	1	3	1	4	5	5	5	5	5	5	5	1	1	1	5	5	5	5	5	5	5	5	5	5	1	1	1	1	1	1	1	1	1	1	1	1	1	1	1	1	1	1	1	1	1	1	1
973335	1	1	2	3	1	4	1	1	1	1	1	1	1	1	1	1	5	5	5	5	5	5	5	5	5	5	1	1	1	1	1	1	1	1	1	1	1	1	1	1	1	1	1	1	1	1	1	1	1
973409	2	5	1	9	1	4	3	2	1	3	4	1	1	3	3	3	5	5	4	5	4	4	3	4	4	5	2	1	1	1	1	1	1	1	1	2	1	1	1	1	1	1	1	1	1	1	1	1	1
973509	2	13	1	3	1	4	5	2	1	4	1	1	1	1	1	1	5	5	5	5	5	5	3	5	5	5	4	1	1	1	1	1	1	1	1	3	1	1	1	1	1	1	1	1	1	1	1	2	1
973577	1	8	5	2	1	4	1	1	1	1	1	1	1	1	1	1	3	5	5	5	4	5	5	5	5	5	1	5	1	1	1	1	1	1	1	1	1	1	1	1	1	1	1	1	1	1	1	1	1
980302	3	5	1	6	1	4	3	3	3	3	3	3	3	3	3	3	5	5	5	5	5	5	5	5	5	5	5	1	1	1	1	1	1	1	1	1	1	1	1	1	1	1	1	1	1	1	1	1	1
980405	2	13	1	6	1	4	5	4	1	5	3	1	1	1	1	2	3	5	4	3	3	3	3	3	3	3	5	1	1	1	1	1	1	1	1	1	1	1	1	1	1	1	1	1	1	1	1	1	1
984330	2	12	1	5	1	4	4	3	1	2	3	1	1	1	1	1	4	5	4	4	4	5	5	5	5	5	2	1	1	1	1	1	1	1	1	1	1	1	1	1	1	1	1	1	1	1	1	1	1
993436	3	13	2	3	1	4	3	3	1	2	2	1	1	3	3	4	5	5	5	5	5	5	5	5	5	5	5	1	1	1	1	1	1	1	1	1	1	1	1	1	1	1	1	1	1	1	1	1	1
996864	4	12	1	5	1	4	5	4	2	5	1	1	1	1	1	4	4	5	5	4	5	5	5	5	5	5	2	1	1	1	1	1	1	1	1	1	1	1	1	1	1	1	1	1	1	1	1	1	1
996880	2	12	1	9	1	4	3	4	2	2	2	1	1	2	1	1	4	3	2	2	2	2	1	3	2	2	1	1	1	1	1	1	1	1	1	5	1	3	1	1	3	1	1	1	1	1	1	1	1
996926	2	11	1	2	1	4	4	3	3	3	3	3	1	1	1	3	5	5	5	5	5	5	5	5	5	5	1	1	1	1	1	1	1	1	1	3	1	1	1	1	1	1	1	1	1	1	1	1	1
997364	2	5	1	5	1	4	5	1	1	1	1	1	1	1	1	1	5	5	5	5	5	5	5	5	5	5	5	1	1	1	1	1	1	1	1	1	1	1	1	1	1	1	1	1	1	1	1	1	1
997455	3	8	1	6	1	4	4	4	1	2	3	1	1	3	1	1	5	5	5	5	5	5	5	5	5	5	4	1	1	1	1	1	1	1	1	1	1	1	1	1	1	1	1	1	1	1	1	1	1
1003241	3	13	2	6	1	4	3	1	1	1	1	1	1	1	1	1	5	5	5	5	5	3	1	5	2	5	2	1	1	1	1	1	1	1	1	3	1	1	1	1	1	1	1	1	1	1	1	3	3
1004331	2	13	1	7	1	4	3	3	1	2	1	1	1	1	1	1	5	5	5	5	5	5	5	5	5	5	5	1	1	1	1	1	1	1	1	3	1	1	1	1	1	1	1	1	1	1	1	1	1
1005362	2	5	2	7	1	4	5	3	1	4	1	1	2	1	1	1	3	3	4	3	3	3	1	5	4	5	2	1	1	1	1	1	1	1	1	1	1	1	1	1	1	1	1	1	1	1	1	1	1
1010170	1	5	2	6	1	4	4	3	1	4	4	1	1	1	3	4	5	5	5	5	5	1	5	5	5	5	5	1	1	1	1	1	1	1	1	4	1	5	1	1	1	1	1	1	1	1	1	2	4
1018201	2	12	1	6	1	4	3	3	3	3	3	3	3	3	3	3	5	5	5	5	5	5	5	5	5	5	5	1	1	1	1	1	1	1	1	1	1	1	1	1	1	1	1	1	1	1	1	1	1
1023039	1	13	3	7	1	4	3	3	1	1	1	1	1	1	1	1	5	5	5	4	4	4	4	4	4	4	1	1	1	1	1	1	1	1	1	1	1	1	1	1	1	1	1	1	1	1	1	1	1
1028811	2	13	1	3	1	4	4	3	4	4	3	3	4	3	4	3	4	5	4	3	5	4	5	4	4	4	2	1	1	1	1	1	1	1	1	3	1	1	1	1	1	1	1	1	1	1	1	1	1
1030233	2	11	1	6	1	4	5	4	1	4	2	1	1	5	1	3	5	5	5	5	5	5	5	5	5	5	3	1	1	1	1	1	1	1	1	3	3	1	1	1	1	1	1	1	1	1	1	3	1
1045307	2	1	1	9	1	4	2	4	2	2	3	1	1	4	3	5	2	2	3	4	3	3	4	2	2	3	2	1	1	1	1	1	1	2	1	5	1	3	1	1	1	1	1	1	1	1	1	1	1
1049069	3	7	1	6	1	4	4	3	2	4	4	2	2	2	2	2	4	5	5	4	4	2	3	4	2	2	5	1	1	1	1	1	1	1	1	5	1	5	1	5	1	1	1	1	1	1	1	1	4
1049110	3	4	1	7	1	4	4	1	1	1	1	1	1	1	1	1	5	5	5	5	5	5	5	5	5	5	5	1	1	1	1	1	1	1	1	5	1	1	1	1	1	1	1	1	1	1	1	2	1
1051762	2	5	1	6	1	4	2	1	1	1	1	1	1	2	3	4	5	5	5	5	5	1	1	5	1	1	2	1	1	1	1	1	1	1	1	1	1	1	1	1	1	1	1	1	1	1	1	1	1
1052940	2	11	1	3	1	4	4	4	1	3	1	1	1	1	1	3	5	5	5	5	5	5	5	5	5	5	4	1	1	1	1	1	1	1	1	5	1	1	1	1	1	1	1	1	1	1	1	1	1
1053592	7	1	1	3	1	4	5	5	3	5	4	2	2	4	4	4	4	5	5	4	4	5	5	5	5	5	5	1	1	1	1	1	1	1	1	1	1	1	1	1	1	1	1	1	1	1	1	1	1
1055335	2	13	1	7	1	4	4	4	3	3	2	2	2	2	2	4	5	5	5	5	5	5	5	5	5	5	4	1	1	1	1	1	1	1	1	1	1	1	1	1	1	1	1	1	1	1	1	1	1
1056122	3	13	1	3	1	4	4	4	2	4	3	1	1	2	2	3	5	5	5	5	5	5	5	5	5	5	4	1	1	1	1	1	1	1	1	5	1	1	1	1	1	1	1	1	1	1	1	2	1
1057979	3	4	1	7	1	4	2	1	1	2	1	1	1	1	1	2	5	5	5	5	5	5	5	5	5	5	2	1	1	1	1	1	1	1	1	1	1	1	1	1	1	1	1	1	1	1	1	1	1
1059635	4	4	1	4	1	4	4	4	1	4	1	1	1	1	1	2	5	5	5	5	5	5	5	5	5	5	5	4	1	1	1	1	1	1	1	5	5	2	2	5	1	1	1	1	1	4	1	1	4
1065093	2	12	1	4	1	4	4	4	1	3	2	1	1	1	1	3	1	2	3	2	2	1	3	5	5	5	5	3	1	2	1	1	1	1	1	1	1	1	1	1	1	1	1	1	1	1	1	1	1
1065424	2	12	1	3	1	4	2	2	3	3	3	3	3	3	3	3	3	4	4	4	4	2	4	2	4	3	1	1	1	1	1	1	1	1	1	1	1	1	1	1	1	1	1	1	1	1	1	1	1
1065798	1	5	2	7	1	4	3	3	1	1	2	1	1	1	1	2	5	4	5	3	4	4	2	4	3	5	2	1	1	1	1	1	1	1	1	1	1	1	1	1	1	1	1	1	1	1	1	1	1
1066976	1	5	2	9	1	4	4	3	3	3	3	3	3	3	3	3	3	3	3	3	3	3	3	3	3	3	2	1	1	1	1	1	1	1	1	1	1	1	1	1	1	1	1	1	1	1	1	1	1
1071344	4	5	1	6	1	4	4	4	3	3	3	3	3	1	1	1	5	5	3	3	3	3	4	5	5	5	2	1	1	1	1	1	1	1	1	5	1	1	1	1	1	1	1	1	1	1	1	2	1
1081980	5	2	1	3	1	4	4	4	1	3	3	1	1	1	1	4	5	5	5	5	5	5	5	5	5	5	4	1	1	1	1	1	1	1	1	3	3	1	1	1	1	1	1	1	1	1	1	1	1
1083212	4	5	1	3	1	4	3	2	2	2	1	1	1	1	1	4	5	5	5	5	5	5	5	5	5	5	5	1	1	1	1	1	1	1	1	3	1	3	3	4	5	1	1	1	1	1	1	2	1
1083538	2	12	1	6	1	4	4	4	2	2	2	2	1	1	1	1	4	5	4	5	4	4	3	4	5	5	1	1	1	1	1	1	1	1	1	1	1	1	1	1	1	1	1	1	1	1	1	1	1
1084021	2	2	1	6	1	4	5	5	3	3	3	1	1	1	1	1	5	5	5	5	5	5	5	5	5	5	2	2	1	1	1	1	1	1	1	3	1	1	1	1	1	1	1	1	1	1	1	1	1
1084571	3	12	1	3	1	4	4	4	3	3	3	3	3	3	3	3	5	5	5	5	5	5	5	5	5	5	1	1	1	1	1	1	1	1	1	1	1	1	1	1	1	1	1	1	1	1	1	1	1
1103773	4	6	1	5	1	4	3	4	1	3	1	1	1	4	1	4	5	4	5	5	5	4	4	5	5	5	4	2	1	1	1	1	1	1	1	1	1	1	1	1	1	1	1	1	1	1	1	1	1
1104541	2	7	2	4	1	4	5	4	1	5	1	1	1	4	1	4	5	5	5	5	5	5	5	5	5	5	1	1	1	1	1	1	1	1	1	1	1	1	1	1	1	1	1	1	1	1	1	1	1
1139773	2	5	2	6	1	4	4	3	1	2	2	1	1	1	1	3	5	5	5	5	5	5	5	5	5	5	1	1	1	1	1	1	1	1	1	2	1	1	1	1	1	1	1	1	1	1	1	1	1
1152027	2	2	1	6	1	4	3	4	1	4	2	2	1	3	3	3	4	5	5	5	4	5	5	5	5	5	5	3	1	1	1	1	1	1	1	5	1	1	1	1	1	1	1	1	1	1	1	1	1
1161115	3	8	2	4	1	4	4	4	3	2	4	2	2	2	2	3	4	5	5	5	3	2	1	3	3	5	1	1	1	1	1	1	1	1	1	1	1	1	1	1	1	1	1	1	1	1	1	1	1
1161154	4	7	1	4	1	4	4	4	1	2	2	1	1	1	1	1	3	5	4	4	5	5	3	4	5	5	2	1	1	1	1	1	1	1	1	2	1	1	1	1	1	1	1	1	1	1	1	1	1
1162901	1	2	5	6	1	4	4	4	2	3	2	2	2	2	2	3	5	5	5	5	5	5	5	5	5	5	5	1	1	1	1	1	1	1	1	5	1	1	1	1	1	1	1	1	1	2	1	1	1
1164749	3	4	1	9	1	4	3	3	3	3	3	1	3	1	1	3	5	5	5	5	3	5	5	5	5	5	5	1	1	1	1	1	1	1	1	1	1	1	1	1	1	1	1	1	1	1	1	1	1
1168657	1	5	1	3	1	4	3	3	1	3	3	1	1	3	1	3	4	4	4	4	4	4	3	5	5	5	2	1	1	1	1	1	1	1	1	3	1	1	1	1	1	1	1	1	1	1	1	1	1
1168724	3	12	1	2	1	4	4	4	2	2	2	2	1	1	3	3	5	5	5	5	5	5	5	5	5	5	1	1	1	1	1	1	1	1	1	5	1	1	1	1	1	1	1	1	1	1	1	1	1
1168751	6	5	2	6	1	4	5	3	2	3	4	2	1	3	2	3	3	2	3	2	2	1	4	2	3	5	4	1	1	1	1	1	1	1	1	5	1	1	4	4	1	4	1	1	1	1	1	1	1
1168761	3	8	1	2	1	4	1	1	1	1	1	1	1	1	1	1	5	5	5	5	5	5	5	5	5	5	5	4	1	1	1	1	1	1	1	3	1	1	1	1	1	1	1	1	1	1	1	3	3
1169686	2	4	1	7	1	4	2	4	1	1	2	1	1	1	2	2	5	5	5	5	5	5	5	5	5	5	5	1	1	1	1	1	1	1	1	2	1	1	1	1	1	1	1	1	1	1	1	1	1
1169977	1	2	2	6	1	4	2	2	1	1	1	1	1	1	1	3	3	5	3	4	3	3	4	3	3	3	5	5	1	1	1	1	1	1	1	3	1	1	1	1	1	1	1	1	1	1	1	1	1
1170660	4	5	1	6	1	4	3	3	3	3	3	3	3	3	3	3	5	5	5	5	5	5	4	4	5	5	5	1	1	1	1	1	1	1	1	3	1	1	1	1	1	1	1	1	1	1	1	1	1
1170662	5	7	2	7	1	4	2	2	1	2	2	2	2	2	2	2	5	5	5	5	5	5	5	5	5	5	2	1	1	1	1	1	1	1	1	1	1	1	1	1	1	1	1	1	1	1	1	1	1
1178955	2	12	1	5	1	4	5	3	1	3	1	1	1	1	1	1	5	5	5	5	5	5	5	5	5	5	1	1	1	1	1	1	1	1	1	1	1	1	1	1	1	1	1	1	1	1	1	1	1
1192985	3	12	1	5	1	4	5	5	2	1	3	1	1	1	1	1	3	5	3	3	5	5	5	5	5	5	1	1	1	1	1	1	1	1	1	1	1	1	1	1	1	1	1	1	1	1	1	1	1
1193850	4	5	1	4	1	4	4	2	2	2	3	1	1	1	1	4	5	5	5	5	4	5	4	4	4	5	4	1	1	1	1	1	1	1	1	3	5	1	1	1	1	1	1	1	1	3	1	1	1
1194327	3	5	1	6	1	4	4	1	1	2	1	1	1	2	1	4	5	5	5	5	5	5	5	5	5	5	3	1	1	1	1	1	1	1	1	1	1	1	1	1	1	1	1	1	1	1	1	1	1
1194537	4	4	1	4	1	4	4	4	4	4	4	4	4	5	4	4	3	4	4	4	4	4	4	4	4	4	4	1	1	1	1	1	1	1	1	1	1	1	1	1	1	1	1	1	1	1	1	1	1
1195502	1	11	3	5	1	4	3	4	3	3	3	2	2	3	2	2	5	5	5	5	5	5	5	5	5	5	3	3	1	1	1	1	1	1	1	5	1	1	1	1	1	1	1	1	1	1	1	1	1
1195513	3	4	1	7	1	4	4	4	1	1	1	1	1	1	1	1	5	5	5	5	5	5	5	5	5	5	5	1	1	1	1	1	1	1	1	5	1	1	1	1	1	1	1	1	1	1	1	1	1
1196173	3	5	2	3	1	4	3	4	1	2	1	1	1	2	1	4	5	5	4	3	5	5	5	5	5	5	2	1	1	1	1	1	1	1	1	1	1	1	1	1	1	1	1	1	1	1	1	1	1
1196190	4	5	1	3	1	4	4	4	1	3	4	2	2	1	1	1	3	4	3	2	2	4	5	5	4	5	1	1	1	1	1	1	1	1	1	1	1	1	1	1	1	1	1	1	1	1	1	1	1
1196219	5	12	1	5	1	4	4	4	3	3	4	3	4	3	3	4	4	5	4	4	4	4	4	4	4	4	2	1	1	1	1	1	1	1	1	1	1	1	1	1	1	1	1	1	1	1	1	1	1
1196572	2	12	1	5	1	4	4	4	3	4	3	3	3	3	3	3	5	5	5	5	5	5	5	5	5	5	4	1	1	1	1	1	1	1	1	1	1	1	1	1	1	1	1	1	1	1	1	1	1
1196612	2	12	1	4	1	4	5	5	1	5	3	1	1	3	3	3	3	4	5	3	2	2	5	5	5	5	5	5	1	1	1	1	1	1	1	5	1	1	1	1	1	1	1	1	1	1	1	1	1
1197026	3	13	1	6	1	4	5	5	3	5	4	1	1	1	1	1	5	5	5	5	5	5	5	5	5	5	5	1	1	1	1	1	1	1	1	2	1	1	1	1	1	1	1	1	1	1	1	2	1
1197052	2	12	1	5	1	4	4	5	4	5	3	4	3	4	4	4	3	4	3	3	4	5	3	4	4	4	4	4	1	1	1	1	1	1	1	1	1	1	1	1	1	1	1	1	1	1	1	1	1
1197215	2	13	1	6	1	4	3	3	2	4	2	2	2	4	1	4	5	5	5	5	5	5	5	5	5	5	2	1	1	1	1	1	1	1	1	3	1	1	1	1	1	1	1	1	1	1	1	1	1
1197444	2	12	1	1	1	4	3	4	3	3	3	3	3	3	3	3	5	5	5	5	5	5	5	5	5	5	5	1	1	1	1	1	1	1	1	1	1	1	1	1	1	1	1	1	1	1	1	1	1
1197445	2	8	1	3	1	4	4	4	1	4	2	1	1	2	1	1	4	4	4	4	5	4	4	4	4	4	2	1	1	1	1	1	1	1	1	1	1	1	1	1	1	1	1	1	1	1	1	1	1
1197626	4	12	1	5	1	4	3	1	1	3	3	1	1	1	1	1	5	5	5	5	5	5	5	5	5	5	1	1	1	1	1	1	1	1	1	1	1	1	1	1	1	1	1	1	1	1	1	1	1
1197671	2	12	1	3	1	4	5	2	2	4	2	2	1	1	1	3	5	5	5	5	5	5	5	5	5	5	1	2	1	1	1	1	1	1	1	1	1	1	1	1	1	1	1	1	1	1	1	1	1
1197792	1	5	2	6	1	4	4	3	3	4	3	2	2	3	3	3	4	4	4	4	4	4	4	4	4	4	1	1	1	1	1	1	1	1	1	1	1	1	1	1	1	1	1	1	1	1	1	1	1
1197846	1	7	2	6	1	4	3	4	1	1	2	1	1	1	3	4	3	4	3	3	5	5	3	4	4	4	5	1	1	2	1	1	1	2	1	5	2	2	1	1	1	1	1	1	1	1	1	2	2
1198020	2	1	1	3	2	4	3	3	1	4	1	1	1	1	1	1	4	5	5	5	5	5	5	5	5	5	5	5	1	1	1	1	1	1	1	5	1	1	1	1	1	1	1	1	1	1	1	1	1
1198323	2	12	1	7	1	4	4	3	3	4	3	2	2	1	1	3	5	5	5	5	5	5	5	5	5	5	2	1	1	1	1	1	1	1	1	1	1	1	1	1	1	1	1	1	1	1	1	1	1
1198380	4	8	1	3	1	4	4	4	2	3	4	2	2	2	1	2	4	4	3	3	4	4	2	3	3	4	1	1	1	1	1	1	1	1	1	1	1	1	1	1	1	1	1	1	1	1	1	1	1
1198382	2	11	6	3	1	4	4	3	1	2	1	1	1	1	1	1	5	5	5	5	4	5	4	5	5	5	2	1	1	1	1	1	1	1	1	1	1	1	1	1	1	1	1	1	1	1	1	1	1
1198414	2	1	1	6	1	4	2	4	1	2	2	1	1	2	4	2	5	5	5	4	5	5	5	5	5	4	4	1	1	1	1	1	1	1	1	1	1	1	1	1	1	1	1	1	1	1	1	1	1
1198465	2	2	2	4	1	4	4	4	1	1	3	1	1	1	1	1	5	5	5	5	5	5	5	5	5	5	5	1	1	1	1	1	1	1	1	1	1	1	1	1	1	1	1	1	1	1	1	1	1
1198562	3	1	1	6	1	4	5	5	1	4	4	1	1	1	1	1	4	5	2	2	2	3	4	4	4	5	2	1	1	1	1	1	1	1	1	1	1	1	1	1	1	1	1	1	1	1	1	1	1
1198579	2	5	2	3	1	4	5	5	1	5	4	2	2	1	1	4	5	5	5	5	5	5	5	5	5	5	2	1	1	1	1	1	1	1	1	5	1	1	1	1	1	1	1	1	1	1	1	1	1
1198856	4	4	1	6	1	4	3	5	3	3	4	2	2	2	3	3	4	5	5	4	3	4	4	5	4	5	4	2	1	1	1	1	1	1	1	3	1	1	1	1	1	1	1	1	1	1	1	2	1
1199012	2	13	3	3	1	4	3	2	2	2	2	2	2	2	2	2	4	4	5	5	4	4	4	4	4	4	1	1	1	1	1	1	1	1	1	1	1	1	1	1	1	1	1	1	1	1	1	1	1
1199094	5	7	2	4	1	4	4	4	1	2	2	1	1	1	1	2	4	5	5	5	4	5	5	5	5	5	3	1	1	1	1	1	1	1	1	3	1	1	1	1	1	1	1	1	1	1	1	1	1
1199290	3	5	1	6	1	4	4	4	1	2	3	1	1	1	1	1	5	5	5	5	4	5	5	5	5	5	4	1	1	1	1	1	1	1	1	1	1	1	1	1	1	1	1	1	1	1	1	1	1
1199401	3	12	1	5	1	4	4	4	4	4	3	2	2	3	3	3	5	5	5	5	5	5	4	5	5	5	3	1	1	1	1	1	1	1	1	1	1	1	1	1	1	1	1	1	1	1	1	1	1
1199434	2	12	1	6	1	4	5	3	1	4	2	1	1	4	1	5	4	5	5	5	5	5	4	5	5	5	3	1	1	1	1	1	1	1	1	1	1	1	1	1	1	1	1	1	1	1	1	1	1
1199475	3	13	5	5	1	4	4	4	3	3	3	3	3	3	3	3	3	3	3	3	3	3	3	3	3	3	2	4	1	1	1	1	1	1	1	5	1	1	1	1	1	1	1	1	1	1	1	1	1
1199831	3	7	2	6	1	4	4	4	2	3	3	1	1	2	1	3	5	5	5	5	5	5	2	4	4	5	2	1	1	1	1	1	1	1	1	3	1	2	1	1	5	4	1	1	1	2	1	1	1
1200135	2	5	5	7	1	4	4	3	1	4	3	2	2	2	2	3	5	5	5	5	5	5	5	5	5	5	2	1	1	1	1	1	1	1	1	1	1	1	1	1	1	1	1	1	1	1	1	1	1
1200188	2	13	1	5	1	4	5	4	3	5	4	1	1	3	3	3	5	5	5	5	5	5	5	5	5	5	1	1	1	1	1	1	1	1	1	1	1	1	1	1	1	1	1	1	1	1	1	1	1
1200682	2	5	1	6	1	4	4	3	2	2	4	2	2	2	2	5	5	5	4	4	4	4	4	4	4	4	1	1	1	1	1	1	1	1	1	1	1	1	1	1	1	1	1	1	1	1	1	1	1
1200975	3	5	2	5	1	4	5	5	3	3	4	2	2	2	2	2	5	5	5	5	4	5	5	5	5	5	3	5	1	1	1	1	1	1	1	5	1	2	1	1	1	1	1	1	1	1	1	1	1
1201218	1	5	5	5	1	4	3	4	1	2	3	1	1	1	1	4	5	5	3	5	4	5	5	5	5	5	5	5	1	1	1	1	1	1	1	5	1	2	1	1	2	2	1	1	1	2	2	1	1
1201309	1	8	2	3	1	4	3	3	1	1	1	1	1	1	1	1	5	5	5	4	5	4	2	2	2	3	4	1	1	1	1	1	1	1	1	4	1	1	1	1	1	1	1	1	1	1	1	1	1
1201424	4	4	3	4	2	4	2	3	4	2	1	3	2	4	3	3	3	2	3	4	1	2	1	3	2	4	2	2	3	3	3	4	1	3	3	2	2	3	1	3	2	4	2	3	3	4	2	1	2
1201608	1	13	3	3	1	4	4	4	3	3	3	1	1	1	1	1	5	5	5	5	5	5	5	5	5	5	1	1	1	1	1	1	1	1	1	1	1	1	1	1	1	1	1	1	1	1	1	1	1
1201981	1	11	2	7	1	4	4	4	3	4	3	2	3	1	1	3	4	5	4	4	5	5	5	5	5	5	2	1	1	1	1	1	1	1	1	2	1	1	1	1	1	1	1	1	1	1	1	1	1
1202082	5	5	1	9	2	4	5	4	1	3	3	1	1	3	1	3	5	5	5	5	5	5	5	5	5	5	2	1	1	1	1	1	1	1	1	1	1	1	1	1	1	1	1	1	1	1	1	1	1
1202395	1	4	1	5	1	4	2	1	1	1	1	1	1	1	2	2	5	5	5	5	5	5	5	5	5	5	5	1	1	1	1	1	1	1	1	5	2	2	2	2	1	1	1	1	1	1	1	2	2
1202891	3	5	1	7	1	4	2	2	1	1	1	1	1	1	5	3	5	5	5	5	3	5	5	5	5	5	3	1	1	1	1	1	1	1	1	3	1	1	1	1	1	1	1	1	1	1	1	1	1
1202923	2	3	2	4	1	4	4	4	2	4	4	3	2	1	1	3	5	5	5	4	5	3	5	4	5	5	2	1	1	1	1	1	1	1	1	2	1	1	1	1	1	1	1	1	1	1	1	1	1
1203006	1	13	4	3	1	4	1	1	1	1	1	1	1	1	1	1	5	5	5	5	5	5	5	5	5	5	4	1	1	1	1	1	1	1	1	4	1	2	1	1	1	1	1	1	1	1	1	1	1
1203263	1	11	3	6	1	4	4	4	2	4	3	1	1	1	1	1	5	5	5	5	5	5	5	5	5	5	4	1	1	1	1	1	1	1	1	2	1	1	1	1	1	1	1	1	1	1	1	1	1
1203477	2	12	1	5	1	4	5	5	2	3	3	2	2	2	2	2	3	5	4	5	5	5	5	5	5	5	2	1	1	1	1	1	1	1	1	1	1	1	1	1	1	1	1	1	1	1	1	1	1
1203969	2	12	1	3	1	4	4	3	1	3	3	1	1	1	1	3	5	5	5	5	5	5	5	5	5	5	4	1	1	1	1	1	1	1	1	1	1	1	1	1	1	1	1	1	1	1	1	1	1
1204467	1	5	2	3	1	4	3	2	2	2	2	2	2	2	2	3	5	5	5	5	4	2	2	3	2	3	4	1	1	1	1	1	1	1	1	1	1	1	1	1	1	1	1	1	1	1	1	1	1
1204555	3	12	1	6	1	4	4	4	2	2	3	2	2	2	2	2	5	5	5	5	5	5	4	5	5	5	4	1	1	1	1	1	1	1	1	3	1	1	1	1	1	1	1	1	1	1	1	1	1
1205198	10	13	3	4	1	4	2	2	2	2	2	1	1	3	3	3	5	5	5	5	5	5	5	5	5	5	5	1	1	1	1	1	1	1	1	5	1	2	1	1	1	1	1	1	1	1	1	1	1
1206198	2	12	1	3	1	4	4	4	1	3	4	1	1	1	1	1	5	5	5	5	5	5	5	5	5	5	4	1	1	1	1	1	1	1	1	3	1	1	1	1	1	1	1	1	1	1	1	1	1
1206827	2	2	5	7	1	4	3	3	1	2	1	1	1	2	2	2	4	5	5	5	4	5	4	5	4	5	5	1	1	1	1	1	1	1	1	1	1	1	1	1	1	1	1	1	1	1	1	1	1
1207076	2	4	1	6	1	4	4	4	1	1	4	2	1	1	1	1	5	5	5	5	5	5	4	5	5	5	5	1	1	1	1	1	1	1	1	2	1	1	1	1	1	1	1	1	1	1	1	2	1
1207097	2	12	1	6	1	4	4	3	2	3	3	2	2	1	1	2	4	5	5	5	5	5	3	5	3	4	2	1	1	1	1	1	1	1	1	1	1	1	1	1	1	1	1	1	1	1	1	1	1
1208066	2	5	1	6	1	4	3	3	1	1	1	1	1	1	1	3	3	5	3	5	3	3	3	5	4	4	4	3	1	1	1	1	1	1	1	1	1	1	1	1	1	1	1	1	1	1	1	1	1
1208244	3	12	1	6	1	4	4	4	1	2	1	1	1	1	1	2	5	5	5	5	5	5	5	5	4	5	2	1	1	1	1	1	1	1	1	1	1	1	1	1	1	1	1	1	1	1	1	1	1
1208388	3	1	1	3	1	4	3	3	1	1	2	1	1	1	1	1	5	5	5	5	5	5	5	5	5	5	5	1	1	1	1	1	1	1	1	5	1	1	1	4	1	1	1	1	1	1	1	2	2
1208659	2	12	1	3	1	4	1	3	1	1	1	1	1	1	1	1	5	5	5	5	5	5	5	5	5	5	2	1	1	1	1	1	1	1	1	3	1	1	1	1	1	1	1	1	1	1	1	1	1
1208749	2	5	1	3	1	4	4	2	1	3	3	1	1	1	1	3	4	5	5	5	5	5	5	5	5	5	5	2	1	1	1	1	1	1	1	3	1	2	2	1	5	3	1	1	1	1	1	2	1
1209334	2	12	3	4	1	4	4	4	3	3	3	2	2	1	1	3	4	5	5	5	5	4	5	3	4	3	2	1	1	1	1	1	1	1	1	1	1	1	1	1	1	1	1	1	1	1	1	1	1
1209494	2	12	1	6	1	4	2	4	3	2	3	1	2	1	2	2	3	3	4	2	3	5	4	4	4	3	5	1	1	1	1	1	1	1	1	3	1	1	1	1	1	1	1	1	1	1	1	1	1
1209899	2	13	2	5	1	4	5	1	1	1	1	1	1	1	1	1	5	5	5	5	5	5	5	5	5	5	2	1	1	1	1	1	1	1	1	1	1	1	1	1	1	1	1	1	1	1	1	1	1
1210017	2	1	2	4	1	4	2	5	1	3	3	1	1	1	1	1	2	3	3	2	5	5	5	5	5	5	4	3	1	1	1	1	1	1	1	5	2	2	1	1	2	2	1	1	2	1	1	2	1
1210282	1	13	2	8	1	4	3	2	1	2	2	1	1	1	1	2	5	5	5	5	5	5	5	5	5	5	4	1	1	1	1	1	1	1	1	3	1	1	1	1	1	1	1	1	1	1	1	1	1
1211060	5	12	1	6	1	4	4	3	3	3	2	2	2	3	3	3	5	5	5	5	5	5	5	5	5	5	1	1	1	1	1	1	1	1	1	1	1	1	1	1	1	1	1	1	1	1	1	1	1
1211240	2	12	1	5	1	4	3	3	1	3	2	2	2	3	1	3	5	5	5	5	4	5	5	5	5	5	4	1	1	1	1	1	1	1	1	1	1	1	1	1	1	1	1	1	1	1	1	1	1
1211447	1	11	2	6	1	4	3	3	1	1	2	1	1	1	1	1	5	2	5	2	2	1	2	3	2	3	1	4	1	1	1	1	1	1	1	1	1	1	1	1	1	1	1	1	1	1	1	1	1
1211836	2	5	5	4	1	4	3	4	1	1	3	1	1	1	2	1	5	4	4	3	3	3	3	3	3	5	5	5	1	1	1	1	1	1	1	5	1	1	1	1	1	1	1	1	1	4	1	1	1
1212732	2	1	2	6	1	4	2	2	2	2	2	2	2	2	2	2	5	5	5	5	5	5	5	5	5	5	5	1	1	1	1	1	1	1	1	3	1	1	1	1	1	1	1	1	1	1	1	1	1
1213208	1	5	2	9	1	4	2	2	1	1	1	1	1	1	1	2	4	5	5	5	3	5	5	5	5	5	2	1	1	1	1	1	1	1	1	1	1	1	1	1	1	1	1	1	1	1	1	1	1
1214515	2	12	1	3	1	4	4	4	2	3	4	2	2	1	1	1	5	5	5	5	5	5	5	5	5	5	5	1	1	1	1	1	1	1	1	1	1	1	1	1	1	1	1	1	1	1	1	1	1
1214999	1	13	5	3	1	4	4	5	2	4	4	1	1	1	1	2	4	3	4	5	4	4	4	5	5	5	1	5	1	1	1	1	1	1	1	1	1	1	1	1	1	1	1	1	1	1	1	1	1
1215208	3	13	1	6	1	4	4	3	2	4	3	2	2	4	4	4	5	5	5	5	5	5	5	5	5	5	2	1	1	1	1	1	1	1	1	3	1	1	1	1	1	1	1	1	1	1	1	1	1
1215611	1	8	3	3	1	4	4	4	1	2	2	1	1	1	1	1	3	4	3	4	5	4	4	4	5	5	2	1	1	1	1	1	1	1	1	5	1	1	1	1	1	1	1	1	1	1	2	1	1
1216036	2	13	1	3	1	4	3	3	2	3	3	2	2	3	2	3	5	5	5	5	5	5	4	5	5	5	5	1	1	1	1	1	1	1	1	2	1	1	1	1	1	1	1	1	1	1	1	1	1
1216597	3	4	1	9	1	4	2	2	1	2	1	1	1	1	1	2	5	5	5	5	5	5	5	5	5	5	4	1	1	1	1	1	1	1	1	2	1	1	1	1	1	1	1	1	1	1	1	2	1
1216921	2	12	1	6	1	4	4	4	3	4	4	3	3	1	1	1	5	4	4	5	5	5	5	5	5	5	4	1	1	1	1	1	1	1	1	1	1	1	1	1	1	1	1	1	1	1	1	1	1
1217444	2	12	1	3	1	4	4	3	2	2	3	2	2	4	1	5	4	5	4	5	4	2	1	5	5	5	1	1	1	1	1	1	1	1	1	1	1	1	1	1	1	1	1	1	1	1	1	1	1
1217953	2	8	1	5	1	4	3	4	2	3	3	3	2	1	1	2	5	5	4	5	5	5	4	5	4	4	2	1	1	1	1	1	1	1	1	1	1	1	1	1	1	1	1	1	1	1	1	1	1
1218243	2	6	1	9	1	4	5	5	1	5	5	1	1	5	1	1	5	5	5	5	5	5	5	5	5	5	4	1	1	1	1	1	1	1	1	1	1	1	1	1	1	1	1	1	1	1	1	1	1
1218772	3	5	1	3	1	4	4	4	4	4	4	4	4	3	3	3	5	5	5	5	5	5	5	5	5	5	5	1	1	1	1	1	1	1	1	3	3	3	3	3	3	5	3	1	1	1	1	3	3
1218931	4	12	1	6	1	4	2	2	1	2	2	1	1	1	1	1	5	5	4	5	5	5	5	5	5	5	2	1	1	1	1	1	1	1	1	1	1	1	1	1	1	1	1	1	1	1	1	1	1
1219035	2	11	5	4	1	4	4	4	1	4	4	1	2	1	1	2	3	5	4	4	4	4	2	4	3	2	3	2	1	1	1	1	1	1	1	3	2	1	1	1	1	1	1	1	1	1	1	2	1
1219068	2	11	1	7	1	4	4	4	4	3	3	1	1	1	1	1	5	5	5	5	5	5	5	5	5	5	5	1	1	1	1	1	1	1	1	3	1	1	1	1	1	1	1	1	1	1	1	1	1
1219092	2	12	1	4	1	4	3	3	1	3	2	1	1	1	1	1	2	3	3	2	2	2	2	3	4	4	4	4	1	1	1	1	1	1	1	5	1	3	1	1	1	1	1	1	1	1	1	1	1
1219119	2	5	1	7	1	4	4	4	2	2	2	2	2	2	2	2	5	5	5	5	5	5	5	5	5	5	5	1	1	1	1	1	1	1	1	2	1	1	1	1	1	1	1	1	1	1	1	1	1
1219226	4	13	2	7	1	4	3	3	1	2	1	1	1	2	2	2	5	5	5	5	4	5	5	5	5	5	2	3	1	1	1	1	1	1	1	1	1	1	1	1	1	1	1	1	1	1	1	1	1
1219476	1	11	1	7	1	4	3	4	1	3	2	1	1	1	1	3	5	5	5	5	5	5	5	5	5	5	5	1	1	1	1	1	1	1	1	5	1	1	1	1	1	1	1	1	1	1	1	1	1
1219693	2	12	1	6	1	4	5	4	1	4	4	3	2	3	3	3	3	4	4	4	4	5	5	5	5	5	1	1	1	1	1	1	1	1	1	1	1	1	1	1	1	1	1	1	1	1	1	1	1
1219755	2	1	1	6	1	4	3	5	1	3	3	1	1	3	1	3	5	5	5	5	5	5	5	5	5	5	1	1	1	1	1	1	1	1	1	3	1	1	1	1	1	1	1	1	1	1	1	1	1
1220288	2	13	1	3	1	4	3	2	1	3	2	1	1	4	4	2	5	5	5	5	4	5	4	5	5	5	5	1	1	1	1	1	1	1	1	3	1	1	1	1	1	1	1	1	1	1	1	2	1
1221137	4	13	2	7	1	4	5	5	4	2	5	1	3	1	1	3	3	1	2	1	1	1	1	2	1	5	4	5	1	1	1	1	1	1	1	3	1	1	1	1	1	5	1	1	1	1	1	1	1
1221760	5	4	1	9	1	4	2	2	2	2	2	2	2	2	3	2	4	4	4	3	4	4	4	4	4	4	5	1	1	1	1	1	1	1	1	5	1	4	1	1	1	1	1	1	1	1	1	1	1
1223119	3	5	1	2	1	4	5	5	5	5	5	3	3	3	1	5	1	1	1	1	1	1	1	1	1	1	3	3	1	1	1	1	1	1	1	3	1	1	1	1	5	5	1	1	1	1	1	1	1
1224079	6	1	1	9	1	4	4	3	2	3	2	2	2	4	1	4	5	5	5	5	5	5	5	5	5	5	2	1	1	1	1	1	1	1	1	1	1	1	1	1	1	1	1	1	1	1	1	1	1
1224442	1	5	2	6	1	4	4	4	2	4	3	1	4	3	2	3	3	3	3	3	3	4	2	2	2	2	4	1	1	1	1	1	1	1	1	1	1	1	1	1	1	1	1	1	1	1	1	1	1
1226254	2	2	5	6	1	4	5	5	3	5	4	2	2	5	3	2	5	5	5	5	5	5	4	5	5	4	1	2	1	1	1	1	1	1	1	1	1	1	1	1	1	1	1	1	1	1	1	1	1
1226792	4	4	1	7	1	4	4	2	2	2	2	1	1	2	2	2	5	5	5	5	5	5	5	5	5	5	4	1	1	1	1	1	1	1	1	1	1	1	1	1	1	1	1	1	1	1	1	1	1
1226995	1	4	5	7	1	4	3	3	1	3	1	1	1	1	1	2	5	5	5	5	5	5	5	5	5	5	4	1	1	1	1	1	1	2	1	4	1	1	1	1	1	1	1	1	1	1	1	1	1
1227120	2	5	1	5	1	4	5	5	2	5	4	1	1	1	1	2	5	5	5	5	5	5	5	5	5	5	5	1	1	1	1	1	1	1	1	3	1	1	1	1	1	1	1	1	1	1	1	1	1
1227935	6	5	1	7	1	4	4	4	1	4	5	1	1	2	1	2	3	3	3	3	3	3	3	4	3	3	4	1	1	1	1	1	1	1	1	1	1	1	1	1	1	1	1	1	1	1	1	1	1
1228230	1	13	2	8	1	4	4	2	2	4	2	2	2	2	2	2	5	5	5	5	5	5	5	5	5	5	1	1	1	1	1	1	1	1	1	1	1	1	1	1	1	1	1	1	1	1	1	1	1
1228746	2	13	2	6	1	4	3	3	3	3	3	3	3	3	3	3	3	3	3	3	3	3	3	3	3	3	2	5	1	1	1	1	1	1	1	1	1	1	1	1	1	1	1	1	1	1	1	1	1
1230268	3	5	1	6	1	4	5	5	1	5	4	4	1	4	2	2	5	3	3	3	3	3	2	2	2	2	5	1	1	1	1	1	1	1	1	3	3	2	2	1	2	1	1	1	1	1	1	1	1
1230652	3	7	1	6	1	4	1	1	1	1	1	1	1	1	1	1	5	5	5	5	5	5	5	5	5	5	1	1	1	1	1	1	1	1	1	1	1	1	1	1	1	1	1	1	1	1	1	1	1
1230963	2	12	1	4	1	4	4	5	1	4	3	3	3	3	3	3	5	5	5	4	4	5	4	5	4	4	4	1	1	1	1	1	1	1	1	1	1	1	1	1	1	1	1	1	1	1	1	1	1
1231390	2	6	1	5	1	4	3	3	3	3	3	2	2	2	2	2	4	5	4	5	5	5	5	5	5	5	4	1	1	1	1	1	1	1	1	1	1	1	1	1	1	1	1	1	1	1	1	1	1
1231630	3	4	1	6	1	4	4	4	1	4	3	1	1	3	1	4	5	5	5	5	5	5	5	5	5	5	5	1	1	1	1	1	1	1	1	3	1	1	1	1	1	1	1	1	1	1	1	2	1
1231859	1	4	1	6	1	4	4	1	1	2	1	1	1	1	1	1	5	5	4	3	3	3	2	3	3	3	1	1	1	1	1	1	1	1	1	3	1	5	1	1	1	1	1	1	1	4	1	1	5
1231905	4	5	1	5	1	4	3	4	2	2	3	1	1	1	1	1	4	5	5	5	4	4	4	4	4	4	4	1	1	1	1	1	1	1	1	5	1	1	1	1	2	1	1	1	1	1	1	1	2
1232163	2	12	1	6	1	4	3	3	3	3	3	3	3	3	3	3	3	4	4	3	4	4	4	4	4	4	1	1	1	1	1	1	1	1	1	1	1	1	1	1	1	1	1	1	1	1	1	1	1
1232482	2	4	1	6	1	4	3	4	1	4	3	1	1	5	5	5	5	3	3	2	2	1	1	1	1	1	5	1	1	1	1	1	1	1	1	1	1	1	1	1	1	1	1	1	1	1	1	1	1
1233422	5	5	1	4	1	4	5	5	2	3	2	1	1	1	1	1	4	5	4	5	5	5	5	5	5	5	4	1	1	1	1	1	1	1	1	1	1	1	1	1	1	1	1	1	1	1	1	1	1
1233785	2	12	1	3	1	4	4	4	1	4	3	1	1	2	1	3	4	5	5	5	5	5	4	5	5	5	2	1	1	1	1	1	1	1	1	1	1	1	1	1	1	1	1	1	1	1	1	1	1
1233879	4	5	1	7	1	4	5	5	1	1	1	1	1	1	1	3	5	5	5	5	5	5	5	5	5	5	4	1	1	1	1	1	1	1	1	3	1	1	1	1	1	1	1	1	1	1	1	1	1
1233899	4	8	2	2	1	4	5	4	1	3	4	1	1	1	1	1	3	3	3	3	5	3	5	5	5	4	1	5	1	1	1	1	1	1	1	5	1	1	4	1	1	1	1	1	1	1	1	1	1
1233967	2	5	5	6	1	4	5	5	3	5	3	3	3	1	1	3	5	5	5	5	5	5	5	5	5	5	2	1	1	1	1	1	1	1	1	1	1	1	1	1	1	1	1	1	1	1	1	1	1
1234209	2	5	2	7	1	4	4	4	3	4	4	3	3	3	3	3	3	4	3	4	4	5	5	4	5	5	2	5	1	1	1	1	1	1	1	1	1	1	1	1	1	1	1	1	1	1	1	1	1
1234603	1	13	2	9	1	4	4	3	1	4	3	1	1	5	1	4	5	4	5	4	4	5	1	2	1	5	1	1	1	1	1	1	1	1	1	1	1	1	1	1	1	1	1	1	1	1	1	1	1
1234622	3	11	1	7	1	4	4	4	4	4	4	2	2	1	1	3	5	5	5	4	4	5	4	4	5	4	5	2	1	1	1	1	1	1	1	3	1	1	1	1	1	1	1	1	1	1	1	1	1
1234985	4	5	1	7	1	4	4	3	2	1	3	2	2	1	1	1	5	5	5	5	5	5	5	5	5	5	4	1	1	1	1	1	1	1	1	1	1	1	1	1	1	1	1	1	1	1	1	1	1
1235207	2	12	1	6	1	4	4	3	1	3	4	2	2	1	1	2	5	5	5	5	4	5	5	5	5	5	5	1	1	1	1	1	1	1	1	1	1	1	1	1	1	1	1	1	1	1	1	1	1
1235595	1	11	5	6	1	4	4	4	2	4	2	2	2	1	1	1	5	5	5	5	5	5	3	4	4	4	2	1	1	1	1	1	1	1	1	1	1	1	1	1	1	1	1	1	1	1	1	1	1
1235609	4	4	1	6	1	4	3	3	3	3	3	3	3	3	3	3	5	5	5	5	5	5	5	5	5	5	2	1	1	1	1	1	1	1	1	2	1	1	1	1	1	1	1	1	1	1	1	1	1
1236453	1	8	5	3	1	4	4	4	2	3	3	3	3	3	3	4	3	3	3	3	3	3	3	3	3	3	4	1	1	1	1	1	1	1	1	1	1	1	1	1	1	1	1	1	1	1	1	1	1
1236523	3	11	1	3	1	4	4	3	1	3	2	2	1	2	2	2	5	5	5	5	5	5	5	5	5	5	4	1	1	1	1	1	1	1	1	1	1	1	1	1	1	1	1	1	1	1	1	1	1
1236804	3	6	2	5	1	4	4	4	1	4	4	1	1	2	1	1	3	5	5	5	4	5	5	5	5	5	4	1	1	1	1	1	1	1	1	1	1	1	1	1	1	1	1	1	1	1	1	1	1
1236872	2	12	1	7	1	4	5	4	3	5	5	3	3	3	3	4	3	3	2	5	4	5	4	5	5	5	5	1	1	1	1	1	1	1	1	1	1	1	1	1	1	1	1	1	1	1	1	1	1
1237025	3	2	1	6	1	4	1	1	1	1	1	1	1	1	1	1	5	5	5	5	5	5	5	5	5	5	1	1	1	1	1	1	1	1	1	1	1	1	1	1	1	1	1	1	1	1	1	1	1
1237416	2	1	1	3	1	4	4	4	3	4	4	2	2	2	2	2	5	5	5	5	5	5	5	5	5	5	2	2	1	1	1	1	1	1	1	2	1	1	1	1	1	1	1	1	1	1	1	1	1
1237768	4	13	1	6	1	4	3	3	3	3	3	3	3	3	3	2	5	5	5	5	5	5	5	5	5	5	3	5	1	1	1	1	1	1	1	5	1	1	1	1	4	1	1	1	1	4	4	1	1
1238052	2	12	1	6	1	4	4	5	2	4	4	2	2	2	1	3	5	5	3	3	3	2	1	2	1	4	2	1	1	1	1	1	1	1	1	1	1	1	1	1	1	1	1	1	1	1	1	1	1
1238319	2	4	1	6	1	4	4	4	3	3	4	1	1	1	1	1	3	5	5	5	5	5	4	5	5	5	2	1	1	1	1	1	1	1	1	1	1	1	1	1	1	1	1	1	1	1	1	1	1
1238533	3	12	1	3	1	4	4	3	2	3	3	3	3	3	3	3	3	5	3	4	4	4	4	5	5	5	1	1	1	1	1	1	1	1	1	1	1	1	1	1	1	1	1	1	1	1	1	1	1
1239122	2	11	1	9	1	4	3	4	2	3	1	1	1	1	1	1	5	5	5	5	5	5	5	5	5	5	5	1	1	1	1	1	1	1	1	2	1	1	1	1	1	1	1	1	1	1	1	1	1
1239145	1	4	2	7	1	4	5	1	1	1	1	1	1	1	4	1	4	5	5	5	5	4	3	5	5	5	5	1	1	1	1	1	1	1	1	3	1	1	1	1	1	1	1	1	1	1	1	2	1
1239726	3	2	2	6	1	4	4	3	1	4	1	1	1	1	1	1	5	4	5	3	3	2	1	1	1	1	5	1	1	1	1	1	1	1	1	3	1	1	1	1	1	1	1	1	1	1	1	2	1
1240114	2	1	1	6	1	4	5	5	3	4	4	3	2	2	3	2	5	5	5	5	5	5	5	5	5	5	5	1	1	1	1	1	1	1	1	1	1	1	1	1	1	1	1	1	1	1	1	1	1
1241170	1	2	2	7	1	4	1	1	1	1	1	1	1	1	1	1	5	5	5	5	5	5	5	5	5	5	1	1	1	1	1	1	1	1	1	5	1	1	1	1	1	1	1	1	1	1	1	1	1
1241336	2	4	1	9	1	4	3	3	3	3	3	3	3	3	1	3	5	5	5	5	5	5	5	5	5	5	4	1	1	1	1	1	1	1	1	4	1	4	1	1	1	1	1	1	1	1	1	1	1
1241494	4	12	1	3	1	4	5	5	1	5	5	1	1	1	1	1	3	4	5	2	1	2	1	3	1	5	3	1	1	1	1	1	1	1	1	2	1	1	1	1	1	1	1	1	1	1	1	1	1
1241889	2	4	1	6	1	4	4	4	4	4	4	4	4	4	4	4	2	3	4	5	4	3	2	1	2	3	5	4	1	1	1	1	1	1	1	1	1	1	1	1	1	1	1	1	1	1	1	1	1
1242408	2	4	1	3	1	4	4	4	1	2	2	1	1	4	2	2	5	5	5	4	5	5	5	5	5	5	4	1	1	1	1	1	1	1	1	3	1	1	1	1	1	1	1	1	1	1	1	1	1
1243088	3	5	2	4	1	4	4	3	2	2	3	1	1	3	3	3	4	4	5	4	3	5	3	4	5	5	3	1	1	1	1	1	1	1	1	1	1	1	1	1	1	1	1	1	1	1	1	1	1
1243277	2	12	1	3	1	4	4	3	2	2	2	2	2	1	1	1	5	5	5	5	5	5	5	5	5	5	5	1	1	1	1	1	1	1	1	1	1	1	1	1	1	1	1	1	1	1	1	1	1
1243669	2	12	1	3	1	4	3	3	3	3	3	1	1	1	1	1	5	5	5	5	4	5	5	5	5	5	1	5	1	1	1	1	1	1	1	1	1	1	1	1	1	1	1	1	1	1	1	1	1
1244759	3	12	1	7	1	4	3	3	3	3	3	3	3	3	3	3	5	5	5	5	5	5	5	5	5	5	4	1	1	1	1	1	1	1	1	1	1	1	1	1	1	1	1	1	1	1	1	1	1
1245427	4	8	1	4	1	4	4	4	2	4	4	2	2	2	2	3	4	5	5	4	4	5	5	5	5	5	4	1	1	1	1	1	1	1	1	1	1	1	1	1	1	1	1	1	1	1	1	1	1
1245672	3	2	1	4	1	4	5	3	3	5	3	3	3	1	1	5	5	5	5	5	5	5	5	5	5	5	2	1	1	1	1	1	1	1	1	3	1	1	1	1	1	1	1	1	1	1	1	1	1
1247630	4	12	1	6	1	4	4	4	4	3	4	4	4	4	4	4	5	5	5	5	5	5	5	5	5	5	1	1	1	1	1	1	1	1	1	1	1	1	1	1	1	1	1	1	1	1	1	1	1
1254633	1	2	5	6	1	4	3	4	3	3	3	3	3	3	3	3	5	5	5	5	5	5	5	5	5	5	5	1	1	1	1	1	1	1	1	3	1	1	1	1	1	1	1	1	1	1	1	1	1
1259800	3	7	1	3	1	4	5	5	2	5	2	2	2	2	2	3	3	3	4	3	4	4	4	2	4	4	2	2	1	1	1	1	1	1	1	1	1	1	1	1	1	1	1	1	1	1	1	1	1
1267950	2	13	1	7	1	4	2	2	2	2	2	2	2	3	2	3	5	5	5	5	5	5	5	5	5	5	5	1	1	1	1	1	1	1	1	1	1	1	1	1	1	1	1	1	1	1	1	1	1
1297370	2	12	3	1	1	4	4	3	2	3	1	1	1	3	1	4	4	5	5	4	4	5	5	5	5	5	2	1	1	1	1	1	1	1	1	1	1	1	1	1	1	1	1	1	1	1	1	1	1
1305639	2	11	1	3	1	4	2	4	1	2	2	5	5	5	4	4	4	5	5	5	5	5	5	5	5	5	5	1	1	1	1	1	1	1	1	3	1	1	1	1	1	1	1	1	1	1	1	1	1
1307147	3	5	1	4	1	4	5	4	3	4	3	3	3	1	1	1	5	5	5	5	5	5	5	5	5	2	5	1	1	1	1	1	1	1	1	1	1	1	1	1	1	1	1	1	1	1	1	1	1
1308486	1	4	2	7	1	4	2	3	1	1	1	2	2	1	1	3	5	5	5	5	5	5	5	5	4	5	4	1	1	1	1	1	1	1	1	3	1	2	1	1	5	1	1	1	1	1	1	2	1
1309282	2	11	3	7	1	4	5	2	2	3	3	3	3	3	3	4	5	5	5	5	5	5	5	5	5	5	2	1	1	1	1	1	1	1	1	2	1	1	1	1	1	1	1	1	1	1	1	1	1
1310901	2	11	3	3	1	4	5	5	1	5	3	1	1	1	1	3	3	3	3	3	3	3	3	3	3	3	3	2	1	1	1	1	1	1	1	3	1	1	1	1	1	1	1	1	1	1	1	1	5
1311600	3	8	1	6	1	4	3	4	2	3	3	2	2	1	1	2	4	4	4	4	4	5	5	5	5	5	4	5	5	5	5	5	5	5	5	1	1	1	1	1	1	1	1	1	1	1	1	1	1
1341384	2	11	1	4	1	4	1	4	1	1	1	1	1	1	1	4	5	5	5	5	5	5	5	5	5	5	2	1	1	1	1	1	1	1	1	1	1	1	1	1	1	1	1	1	1	1	1	1	1
1343230	2	11	1	6	1	4	5	4	1	4	3	3	3	1	1	1	5	5	5	5	5	5	5	5	5	5	5	1	1	1	1	1	1	1	1	3	1	1	1	1	1	1	1	1	1	1	1	1	1
1347373	4	5	1	3	1	4	3	3	3	3	3	3	3	3	3	3	4	4	4	4	4	4	4	4	4	4	5	5	5	5	5	5	5	5	5	1	1	1	1	1	1	1	1	1	1	1	1	1	1
1348372	2	12	5	5	1	4	5	5	1	3	4	2	3	1	1	3	4	4	3	3	3	5	3	4	4	4	2	1	1	1	1	1	1	1	1	2	1	1	1	1	1	1	1	1	1	1	1	1	1
1348535	3	2	1	6	1	4	4	4	2	3	2	2	2	3	2	2	5	5	5	4	3	4	4	4	4	3	1	1	1	1	1	1	1	1	1	3	1	1	1	1	3	1	1	1	3	4	1	1	1
1348856	4	2	2	4	1	4	3	3	3	3	3	3	3	3	3	3	3	3	3	3	3	3	3	3	3	3	1	1	1	1	1	1	1	1	1	1	1	1	1	1	1	1	1	1	1	1	1	1	1
1351272	1	5	5	6	1	4	3	3	1	1	2	1	1	2	2	2	4	5	4	3	3	4	4	4	4	4	4	5	1	1	1	1	1	1	1	1	1	1	1	1	1	1	1	1	1	1	1	1	1
1351329	2	4	1	4	1	4	4	3	3	3	3	3	3	3	3	3	5	5	5	5	5	5	5	5	5	5	2	1	1	1	1	1	1	1	1	5	1	1	1	1	1	5	1	1	1	1	1	1	1
1351692	3	2	1	7	1	4	4	2	2	2	4	1	1	1	1	1	5	5	5	5	5	5	5	5	5	5	5	4	1	1	1	1	1	1	1	5	1	1	1	1	3	1	1	1	1	1	1	1	1
1351942	2	12	1	4	1	4	4	4	2	2	2	2	2	2	2	3	5	5	5	5	5	5	5	5	5	5	4	1	1	1	1	1	1	1	1	3	1	1	1	1	1	1	1	1	1	1	1	1	1
1354436	2	4	1	2	1	4	4	3	2	4	3	3	3	3	3	4	4	5	3	4	5	4	2	4	4	3	5	5	5	5	5	5	5	5	5	1	1	1	1	1	1	1	1	1	1	1	1	1	1
1355138	2	13	1	4	1	4	4	4	2	3	2	2	2	3	2	3	5	5	5	5	5	5	5	5	5	5	5	1	1	1	1	1	1	1	1	3	1	1	1	1	1	1	1	1	1	1	1	1	1
1355555	2	5	1	7	1	4	3	3	3	3	3	3	3	3	3	3	4	4	4	5	5	4	1	1	2	1	1	1	1	1	1	1	1	1	1	5	1	1	1	1	1	1	1	1	1	1	1	1	1
1358111	5	13	1	1	1	4	5	3	3	3	3	1	1	1	1	2	5	5	5	5	5	5	5	5	5	5	5	1	1	1	1	1	1	1	1	3	1	1	1	1	1	1	1	1	1	1	1	2	1
1361825	3	5	2	6	1	4	4	4	2	3	3	3	3	3	3	3	3	4	4	4	4	4	4	4	4	2	2	3	1	1	1	1	1	1	1	1	1	1	1	1	1	1	1	1	1	1	1	1	1
1361905	2	12	1	2	1	4	5	4	3	4	3	3	2	1	1	2	5	5	5	5	5	5	4	5	5	5	3	1	1	1	1	1	1	1	1	1	1	1	1	1	1	1	1	1	1	1	1	1	1
1362139	1	7	2	9	1	4	2	2	1	1	2	1	1	1	1	2	5	5	5	5	5	5	5	5	5	5	4	1	1	1	1	1	1	1	1	1	1	1	1	1	1	1	1	1	1	1	1	1	1
1362922	2	13	2	3	1	4	3	1	1	2	1	1	1	1	1	3	3	3	3	3	3	3	3	3	3	3	1	1	1	1	1	1	1	1	1	1	1	1	1	1	1	1	1	1	1	1	1	1	1
1366739	2	4	1	7	1	4	3	3	2	3	3	3	3	2	2	3	4	4	4	3	4	4	4	4	3	4	4	1	1	1	1	1	1	1	1	5	1	1	1	1	1	1	1	1	1	1	1	1	1
1368074	2	13	1	3	1	4	4	4	3	4	4	2	3	3	3	3	5	5	5	5	5	5	5	5	5	5	1	1	1	1	1	1	1	1	1	1	1	1	1	1	1	1	1	1	1	1	1	1	1
1371414	2	13	2	4	1	4	3	2	1	1	2	2	1	1	1	1	4	5	4	5	4	4	4	4	4	5	4	1	1	1	1	1	1	1	1	2	1	1	1	1	1	1	1	1	1	1	1	1	1
1371811	4	3	1	4	1	4	4	3	1	1	2	1	1	1	1	3	5	5	5	5	5	5	5	5	5	5	4	1	1	1	1	1	1	1	1	3	1	1	1	1	1	1	1	1	1	1	1	1	1
1371955	2	5	1	9	1	4	4	4	2	4	4	1	1	1	1	1	5	5	5	5	5	5	5	5	5	5	4	1	1	1	1	1	1	1	1	1	1	1	1	1	1	1	1	1	1	1	1	1	1
1375543	1	5	2	3	1	4	5	4	3	4	3	2	1	2	2	1	5	5	5	5	5	5	5	5	5	5	5	2	1	1	1	1	1	1	1	2	1	1	1	1	1	1	1	1	1	1	1	1	1
1375979	1	11	2	4	1	4	1	1	1	1	1	1	1	1	1	1	5	5	5	5	5	5	5	5	5	5	3	1	1	1	1	1	1	1	1	3	1	1	1	1	1	1	1	1	1	1	1	3	3
1376273	3	13	2	2	1	4	3	3	1	2	3	1	1	3	3	3	5	5	5	5	5	5	3	5	5	5	5	1	1	1	1	1	1	1	1	2	1	1	1	1	1	1	1	1	1	1	1	1	1
1377322	3	13	2	6	1	4	3	3	3	4	3	3	3	3	3	3	3	3	3	2	3	4	3	2	3	3	4	5	5	5	5	5	5	5	5	3	2	1	1	1	1	1	1	1	1	1	1	1	1
1380404	3	8	1	3	1	4	4	3	1	1	1	1	1	3	1	1	5	5	5	5	5	5	5	5	5	5	4	1	1	1	1	1	1	1	1	1	1	1	1	1	1	1	1	1	1	1	1	1	1
1380703	2	11	1	9	1	4	4	1	1	3	1	1	1	1	1	2	5	5	5	5	5	5	5	5	5	5	4	1	1	1	1	1	1	1	1	1	1	1	1	1	1	1	1	1	1	1	1	1	1
1381713	2	11	1	9	1	4	4	4	1	4	3	2	1	1	1	1	5	5	5	5	5	5	5	5	5	5	4	1	1	1	1	1	1	1	1	1	1	1	1	1	1	1	1	1	1	1	1	1	1
1383972	4	4	1	9	1	4	1	1	1	1	1	1	1	1	1	1	5	5	5	5	5	5	5	5	5	5	5	1	1	1	1	1	1	1	1	1	1	1	1	1	1	1	1	1	1	1	1	1	1
1384112	3	12	1	3	1	4	5	5	2	5	4	3	3	4	4	4	5	5	5	5	5	5	2	5	4	4	1	1	1	1	1	1	1	1	1	1	1	1	1	1	1	1	1	1	1	1	1	1	1
1386472	3	5	1	2	1	4	2	3	2	1	1	1	1	1	1	2	5	5	5	5	5	5	5	5	5	5	4	1	1	1	1	1	1	1	1	1	1	1	1	1	1	1	1	1	1	1	1	1	1
1387520	2	12	1	3	1	4	4	3	3	3	3	3	3	3	1	3	5	5	5	5	5	5	5	5	4	4	2	1	1	1	1	1	1	1	1	1	1	1	1	1	1	1	1	1	1	1	1	1	1
1390231	4	8	1	3	1	4	3	3	3	3	3	3	3	3	3	3	5	5	5	5	5	5	5	5	5	5	1	1	1	1	1	1	1	1	1	1	1	1	1	1	1	1	1	1	1	1	1	1	1
1392783	4	12	1	5	1	4	4	5	3	3	4	3	3	3	3	3	3	2	2	2	2	3	3	3	3	3	2	1	1	1	1	1	1	1	1	1	1	1	1	1	1	1	1	1	1	1	1	1	1
1393013	2	11	1	3	1	4	4	3	2	3	2	2	2	3	3	3	5	5	5	5	5	5	5	5	5	5	4	1	1	1	1	1	1	1	1	1	1	1	1	1	1	1	1	1	1	1	1	1	1
1396518	5	8	1	5	1	4	4	4	2	4	4	2	2	2	2	4	4	5	5	5	5	5	5	5	5	5	5	1	1	1	1	1	1	1	1	1	1	1	1	1	1	1	1	1	1	1	1	1	1
1397808	2	12	1	3	1	4	4	4	2	3	4	1	1	1	1	2	4	5	5	5	5	5	5	5	5	5	4	1	1	1	1	1	1	1	1	2	1	1	1	1	1	1	1	1	1	1	1	1	1
1398039	3	4	1	6	1	4	5	5	1	5	3	1	1	5	5	5	1	3	2	2	2	2	5	5	5	5	4	4	1	1	1	1	1	1	1	3	1	1	1	1	1	1	1	1	1	1	1	1	1
1400476	2	5	1	3	1	4	5	4	3	4	3	3	3	1	4	2	3	5	3	3	3	4	2	3	2	2	4	5	1	1	1	1	1	1	1	3	1	1	1	1	1	1	1	1	1	1	1	1	1
1401296	1	2	5	4	1	4	3	1	1	2	1	1	1	1	1	1	5	5	5	5	5	5	5	5	5	5	3	1	3	3	1	1	1	1	1	5	1	2	1	1	1	1	1	1	2	4	1	1	1
1404409	2	12	1	6	1	4	5	5	3	4	3	1	1	4	3	4	5	5	5	3	4	5	5	5	5	5	4	1	1	1	1	1	1	1	1	1	1	1	1	1	1	1	1	1	1	1	1	1	1
1408208	3	12	1	5	1	4	4	4	2	4	3	1	1	3	3	3	5	5	5	5	5	5	5	5	5	5	4	1	1	1	1	1	1	1	1	3	1	1	1	1	1	1	1	1	1	1	1	1	1
1408559	4	8	1	6	1	4	3	3	1	2	3	1	1	2	2	2	5	5	5	5	5	5	5	5	5	5	2	1	1	1	1	1	1	1	1	1	1	1	1	1	1	1	1	1	1	1	1	1	1
1408808	3	12	1	3	1	4	5	5	1	2	3	3	2	1	1	3	3	4	5	4	5	4	5	5	4	5	1	1	1	1	1	1	1	1	1	1	1	1	1	1	1	1	1	1	1	1	1	1	1
1409065	1	13	2	6	1	4	4	4	2	4	3	2	2	1	2	3	5	5	5	4	5	5	5	5	5	3	5	1	1	1	1	1	1	1	1	1	1	1	1	1	1	1	1	1	1	1	1	1	1
1409136	2	5	1	5	1	4	4	4	1	4	4	2	1	2	2	2	4	5	5	5	5	5	5	5	5	5	5	1	1	1	1	1	1	1	1	1	1	1	1	1	1	1	1	1	1	1	1	1	1
1409710	4	2	1	7	1	4	4	4	3	4	4	2	2	1	1	1	5	5	5	5	5	5	5	5	5	5	4	1	1	1	1	1	1	1	1	1	1	1	1	1	1	1	1	1	1	1	1	1	1
1409799	2	12	1	2	1	4	2	4	1	2	1	1	1	1	1	3	5	5	5	4	4	5	5	5	5	5	1	1	1	1	1	1	1	1	1	1	1	1	1	1	1	1	1	1	1	1	1	1	1
1409892	2	8	1	7	1	4	3	3	3	1	1	1	1	1	1	1	5	5	5	5	5	5	5	5	5	5	1	1	1	1	1	1	1	1	1	1	1	1	1	1	1	1	1	1	1	1	1	1	1
1409962	1	13	2	6	1	4	4	3	2	2	3	3	2	2	2	2	3	2	2	2	2	2	2	1	1	1	2	1	2	1	1	1	1	1	1	3	1	1	1	1	1	1	1	1	1	1	1	1	1
1410245	4	3	1	5	1	4	4	4	1	2	2	2	1	1	1	1	5	5	4	5	4	4	5	5	4	4	2	1	1	1	1	1	1	1	1	1	1	1	1	1	1	1	1	1	1	1	1	1	1
1410262	3	12	1	7	1	4	4	4	2	4	3	2	2	2	2	4	5	5	5	5	5	5	4	5	5	5	4	4	1	1	1	1	1	1	1	1	1	1	1	1	1	1	1	1	1	1	1	1	1
1411020	2	5	1	4	2	4	4	5	1	2	2	1	1	3	1	2	4	5	5	5	4	4	3	5	4	5	4	1	1	1	1	1	1	1	1	3	1	1	1	1	1	1	1	1	1	1	1	1	1
1411918	2	4	2	7	1	4	4	3	3	3	4	3	3	4	4	4	4	4	4	4	4	4	4	4	5	4	4	1	1	1	1	1	1	1	1	1	1	1	1	1	1	1	1	1	1	1	1	1	1
1412825	3	12	1	5	1	4	4	2	2	3	3	2	2	2	2	3	5	5	5	5	5	5	5	5	5	5	2	1	1	1	1	1	1	1	1	1	1	1	1	1	1	1	1	1	1	1	1	1	1
1413426	2	5	1	9	1	4	3	2	1	2	1	1	1	1	1	4	5	5	5	5	5	5	5	5	5	5	2	1	1	1	1	1	1	1	1	3	2	2	2	2	5	1	1	1	5	2	1	2	1
1413427	2	12	1	4	1	4	3	3	1	2	2	1	1	2	1	3	5	5	5	5	4	5	5	5	5	5	2	1	1	1	1	1	1	1	1	1	1	1	1	1	1	1	1	1	1	1	1	1	1
1414579	1	5	2	6	1	4	4	5	1	2	2	1	1	1	1	1	5	5	5	5	5	5	5	5	5	5	5	1	1	1	1	1	1	5	1	1	3	1	1	1	1	1	1	1	1	1	1	1	1
1414803	3	5	2	3	1	4	4	3	1	2	2	1	1	1	1	1	5	5	5	5	5	5	5	5	5	5	4	1	1	1	1	1	1	1	1	1	1	1	1	1	1	1	1	1	1	1	1	1	1
1415010	2	12	1	6	1	4	5	4	2	4	2	2	2	2	2	4	4	5	5	5	5	5	5	5	5	5	2	2	1	1	1	1	1	1	1	1	1	1	1	1	1	1	1	1	1	1	1	1	1
1415898	2	8	1	4	1	4	3	3	3	3	3	3	3	3	3	3	5	5	5	5	5	5	5	5	5	5	5	1	1	1	1	1	1	1	1	3	1	1	1	1	1	1	1	1	1	1	1	1	1
1416102	3	8	1	5	1	4	4	3	2	3	2	1	1	1	1	1	5	5	5	5	5	5	4	5	5	4	5	1	1	1	1	1	1	1	1	3	1	1	1	1	1	1	1	1	1	1	1	2	2
1416416	2	4	1	6	1	4	2	2	2	2	2	2	2	2	2	2	5	5	5	5	5	5	5	5	5	5	4	5	5	5	5	5	5	5	5	5	1	1	1	1	1	1	1	1	1	1	1	1	1
1417539	4	11	1	6	1	4	4	3	2	3	2	2	2	3	3	3	5	5	5	5	5	5	5	5	5	5	4	1	1	1	1	1	1	1	1	5	2	2	1	1	1	2	1	1	1	2	1	2	2
1417806	1	4	2	6	1	4	2	2	2	2	2	2	2	2	1	2	5	5	5	5	5	5	5	5	5	5	4	1	1	1	1	1	1	1	1	5	1	1	1	1	5	5	1	1	1	1	1	1	1
1418796	2	12	1	3	1	4	5	5	3	3	3	2	3	1	1	3	5	5	5	5	5	5	5	5	5	5	1	1	1	1	1	1	1	1	1	1	1	1	1	1	1	1	1	1	1	1	1	1	1
1419389	2	11	1	3	1	4	5	5	2	5	4	1	1	1	1	1	4	5	5	5	5	5	5	5	5	5	5	2	1	1	1	1	1	1	1	4	2	1	1	1	1	1	1	1	1	1	1	2	1
1419570	2	4	1	8	1	4	5	3	1	3	2	1	1	2	1	3	5	5	5	5	5	5	5	5	5	5	4	1	1	1	1	1	1	1	1	1	2	1	1	1	1	1	1	1	1	1	1	1	1
1419660	2	11	1	6	1	4	3	2	1	2	1	1	1	1	1	1	5	5	5	5	5	5	5	5	5	5	5	1	1	1	1	1	1	1	1	2	1	1	1	1	1	1	1	1	1	1	1	2	1
1420325	1	13	2	6	1	4	4	3	3	3	3	3	3	3	3	3	5	5	5	5	5	5	5	5	5	5	2	1	1	1	1	1	1	1	1	1	1	1	1	1	1	1	1	1	1	1	1	1	1
1420827	1	2	3	6	1	4	2	3	1	1	2	1	1	1	1	1	5	5	4	4	5	5	5	5	5	5	4	2	1	1	1	1	1	1	1	3	1	1	1	1	1	1	1	1	1	1	1	1	1
1421098	1	13	2	3	1	4	4	3	1	4	3	1	1	1	1	2	4	5	5	5	4	5	3	5	5	5	5	1	1	1	1	1	1	1	1	3	1	1	1	1	1	1	1	1	2	1	1	2	5
1421218	1	13	2	3	1	4	5	5	5	5	5	5	5	5	5	5	5	5	5	5	5	5	5	5	5	5	4	5	1	1	1	1	1	1	1	3	1	3	5	1	1	1	1	1	1	1	1	1	1
1421974	2	4	1	6	1	4	3	3	3	3	3	3	3	3	3	3	4	5	5	4	5	5	5	5	5	5	5	2	1	1	1	1	1	1	1	5	1	1	1	1	1	1	1	1	1	1	1	1	1
1423533	4	5	1	6	1	4	4	4	2	3	3	2	2	2	2	3	4	5	4	4	4	4	5	5	5	5	4	1	1	1	1	1	1	1	1	1	1	1	1	1	1	1	1	1	1	1	1	1	1
1424402	2	11	1	7	1	4	1	1	1	1	1	1	1	1	1	1	5	5	5	5	5	5	5	5	5	5	5	1	1	1	1	1	1	1	1	5	1	2	5	1	1	1	1	1	1	1	1	2	2
1425061	4	12	1	3	1	4	4	3	2	3	1	1	1	3	3	3	5	5	5	5	5	5	5	5	5	5	2	2	1	1	1	1	1	1	1	1	1	1	1	1	1	1	1	1	1	1	1	1	1
1425062	3	5	1	6	1	4	3	3	2	2	2	1	1	1	1	3	3	4	3	5	5	5	3	4	5	5	2	1	1	1	1	1	1	1	1	2	2	1	1	1	1	1	1	1	1	1	1	1	1
1425238	2	1	1	6	1	4	4	5	2	3	2	2	2	3	3	3	5	5	5	5	5	5	5	5	5	5	4	1	1	1	1	1	1	1	1	4	1	1	1	1	1	1	1	1	1	1	1	1	1
1426277	2	7	1	6	1	4	4	4	1	2	3	2	1	1	1	2	4	5	4	5	4	5	5	5	5	5	4	1	1	1	1	1	1	1	1	3	1	1	1	1	1	1	1	1	1	1	1	1	1
1426413	2	13	1	6	1	4	4	4	4	4	4	4	4	4	4	3	4	4	5	5	5	5	5	5	5	4	3	1	1	1	1	1	1	1	1	3	3	3	1	1	1	1	1	1	1	1	1	1	1
1426503	2	13	1	3	1	4	4	4	3	4	3	3	3	2	3	4	5	5	4	4	4	4	4	5	5	5	5	1	1	1	1	1	1	1	1	3	1	1	1	1	1	1	1	1	1	1	1	2	1
1426760	2	6	1	3	1	4	4	3	1	3	3	1	1	1	1	1	4	5	5	5	5	5	2	5	5	5	5	1	1	1	1	1	1	1	1	5	1	1	1	1	2	1	1	1	1	1	1	2	1
1426812	2	12	1	6	1	4	4	4	1	3	3	1	1	1	1	3	4	5	5	4	5	5	5	5	5	5	3	1	1	1	1	1	1	1	1	1	1	1	1	1	1	1	1	1	1	1	1	1	1
1427282	4	12	1	5	1	4	5	4	1	4	2	1	1	1	1	1	5	5	5	5	5	5	5	5	5	5	4	1	1	1	1	1	1	1	1	1	1	1	1	1	1	1	1	1	1	1	1	1	1
1427995	2	4	1	3	1	4	5	4	2	4	4	1	1	1	1	3	5	5	5	5	5	5	5	5	5	5	3	1	1	1	1	1	1	1	1	3	1	1	1	1	1	1	1	1	1	1	1	1	1
1431223	3	8	1	9	1	4	2	5	1	2	1	1	1	2	1	3	3	2	3	1	1	3	3	2	2	3	2	5	1	1	1	1	1	1	1	1	1	1	1	1	1	1	1	1	1	1	1	1	1
1435019	5	4	1	3	1	4	5	1	1	1	1	1	1	1	1	1	5	5	5	5	5	5	5	5	5	5	4	1	1	1	1	1	1	1	1	1	1	1	1	1	1	1	1	1	1	1	1	1	1
1435228	3	5	1	5	2	4	4	4	4	3	3	2	1	1	1	1	5	5	5	5	5	5	5	5	5	5	5	1	1	1	1	1	1	1	1	3	1	1	1	1	1	1	1	1	1	1	1	2	1
1435491	2	1	2	3	1	4	1	1	1	1	1	1	1	1	1	1	5	5	5	5	5	5	5	5	5	5	4	1	1	1	1	1	1	1	1	5	1	1	1	1	1	1	1	1	1	1	1	1	1
1438428	2	4	2	6	1	4	1	2	1	2	2	1	1	2	2	3	5	5	5	5	5	5	5	5	5	5	5	4	1	1	1	1	1	1	1	5	1	2	1	1	2	1	1	1	2	2	2	2	1
1439276	4	11	1	3	1	4	4	3	2	3	3	3	2	3	3	3	4	5	5	5	5	5	5	5	5	5	4	4	1	1	1	1	1	1	1	1	1	1	1	1	1	1	1	1	1	1	1	1	1
1441935	6	3	1	6	1	4	2	4	1	1	1	1	1	1	1	2	5	5	5	5	5	5	5	5	5	5	4	1	1	1	1	1	1	1	1	1	1	1	1	1	1	1	1	1	1	1	1	1	1
1442894	3	5	1	2	1	4	3	3	3	3	3	3	3	3	3	3	5	5	5	5	5	5	5	5	5	5	2	1	1	1	1	1	1	1	1	1	1	1	1	1	1	1	1	1	1	1	1	1	1
1443035	4	13	1	7	1	4	3	2	2	2	2	1	1	1	1	3	3	3	3	3	3	3	3	4	3	3	2	3	1	1	1	1	1	1	1	1	1	1	1	1	1	1	1	1	1	1	1	1	1
1445379	4	13	2	5	1	4	5	5	2	3	3	1	2	1	1	3	1	1	1	1	1	1	1	1	1	1	4	3	1	1	1	1	1	1	1	5	1	5	1	2	1	2	1	1	1	1	1	1	1
1446174	2	13	1	8	1	4	5	5	2	4	2	2	2	1	1	1	5	5	5	5	5	5	5	5	5	5	2	1	1	1	1	1	1	1	1	3	1	3	1	1	1	1	1	1	1	1	1	1	1
1446525	3	11	1	3	1	4	4	5	1	3	4	2	2	5	1	2	5	5	5	5	5	5	4	5	5	5	4	1	1	1	1	1	1	1	1	2	1	1	1	1	1	1	1	1	1	1	1	1	1
1450227	3	5	1	4	1	4	5	4	3	5	4	4	3	3	3	3	4	4	5	5	4	5	5	5	5	5	4	1	1	1	1	1	1	1	1	1	1	1	1	1	1	1	1	1	1	1	1	1	1
1450424	2	13	1	6	1	4	4	4	2	3	2	2	2	2	2	2	4	5	4	4	4	5	4	5	5	5	4	4	1	1	1	1	1	1	1	3	1	1	1	1	1	1	1	1	1	1	1	1	1
1450553	2	12	1	1	1	4	3	4	1	1	2	1	1	1	1	1	5	5	5	5	5	4	5	5	5	5	2	1	1	1	1	1	1	1	1	5	1	1	1	1	1	1	1	1	1	1	1	1	1
1450631	3	5	5	3	1	4	3	3	3	2	2	4	3	3	3	3	4	5	4	4	5	5	5	5	5	5	1	1	1	1	1	1	1	1	1	1	1	1	1	1	5	1	1	1	1	1	1	1	1
1455523	2	11	1	1	1	4	3	2	1	1	1	1	1	1	1	1	5	5	5	5	5	5	5	5	5	5	5	1	1	1	1	1	1	1	1	3	1	1	1	1	1	1	1	1	1	1	1	1	1
1455908	3	5	1	6	1	4	1	1	1	1	1	1	1	1	1	1	5	5	5	4	4	2	2	5	5	5	2	2	1	1	1	1	1	1	1	5	2	1	1	1	1	4	1	1	1	1	1	2	1
1456780	2	12	1	3	2	4	5	5	2	3	3	1	1	1	1	1	4	5	3	4	4	5	4	5	4	5	2	1	1	1	1	2	1	1	1	5	1	1	1	1	1	1	1	1	1	1	1	2	2
1458498	2	11	1	4	1	4	5	5	3	5	3	3	3	4	3	4	5	5	5	5	5	5	5	5	5	5	5	1	1	1	1	1	1	1	1	5	1	5	5	1	2	1	1	1	1	2	1	1	1
1458580	3	3	2	6	2	4	2	3	1	1	2	1	1	1	2	2	5	5	5	5	5	5	2	5	5	5	5	1	1	1	1	1	1	1	1	3	1	1	1	1	1	1	1	1	1	3	1	1	1
1458696	3	12	1	4	1	4	4	5	3	3	4	2	2	2	2	2	5	5	4	4	4	5	5	5	5	5	3	2	1	1	1	1	1	1	1	1	1	1	1	1	1	1	1	1	1	1	1	1	1
1459773	1	2	5	9	1	4	2	2	1	2	2	2	1	2	2	2	5	5	5	5	5	5	4	5	5	5	5	4	1	1	1	1	1	1	1	3	1	1	1	1	1	1	1	1	1	1	1	4	1
1464901	2	5	1	9	1	4	2	2	1	2	2	1	1	1	1	2	5	5	5	4	5	5	4	5	5	5	4	1	1	1	1	1	1	1	1	1	1	1	1	1	1	1	1	1	1	1	1	1	1
1468311	2	12	1	4	1	4	3	4	2	3	2	3	2	4	2	3	5	5	4	4	3	5	3	3	3	3	5	3	1	1	1	1	1	1	1	1	1	1	1	1	1	1	1	1	1	1	1	1	1
1468411	1	13	5	9	1	4	3	3	2	2	2	2	2	2	2	2	5	5	5	5	5	5	5	5	4	5	3	1	1	1	1	1	1	1	1	1	1	1	1	1	1	1	1	1	1	1	1	1	1
1468873	1	7	2	6	1	4	4	4	1	3	3	1	1	1	1	1	5	5	5	5	5	5	3	5	3	3	5	3	1	1	1	1	1	1	1	3	1	1	1	1	1	1	1	1	1	1	1	1	1
1479277	3	7	1	4	1	4	4	4	2	2	3	1	1	1	1	2	4	5	5	5	5	5	5	5	5	5	4	1	1	1	1	1	1	1	1	2	1	1	1	1	1	1	1	1	1	1	1	1	1
1479306	2	12	1	2	1	4	5	4	1	5	1	1	1	5	1	1	5	5	5	5	5	5	5	5	5	5	5	1	1	1	1	1	1	1	1	1	1	1	1	1	1	1	1	1	1	1	1	1	1
1479423	2	5	1	5	1	4	4	4	2	2	3	2	2	2	1	4	3	5	5	4	5	4	5	4	4	4	2	1	1	1	1	1	1	1	1	1	1	1	1	1	1	1	1	1	1	1	1	1	1
1479655	1	8	2	3	1	4	4	4	2	4	4	2	2	2	2	2	3	3	2	2	2	2	3	3	3	4	4	3	1	1	1	1	1	1	1	4	1	1	1	1	1	1	1	1	1	1	1	1	1
1479766	4	1	1	7	1	4	3	3	3	3	2	1	1	1	1	2	4	4	4	4	4	4	4	4	4	5	4	1	1	1	1	1	1	1	1	3	1	2	1	1	2	2	1	1	1	1	1	1	5
1482880	4	4	1	4	1	4	4	4	1	4	4	1	1	1	1	3	5	5	5	5	5	5	5	5	5	5	4	1	1	1	1	1	1	1	1	5	1	2	4	1	1	2	1	4	1	1	1	1	1
1483589	3	12	1	5	1	4	4	4	4	4	4	3	3	2	2	2	2	2	4	4	4	3	4	4	4	4	4	1	1	1	1	1	1	1	1	1	1	1	1	1	1	1	1	1	1	1	1	1	1
1487472	3	12	1	6	1	4	4	5	1	1	4	1	1	1	1	1	5	5	5	5	5	5	5	5	5	5	4	1	1	1	1	1	1	1	1	2	1	1	1	1	1	1	1	1	1	1	1	1	1
1487927	3	5	1	6	1	4	4	3	2	1	2	1	1	3	3	3	5	5	5	5	5	5	5	5	5	5	5	1	1	1	1	1	1	1	1	3	1	1	1	1	1	1	1	1	1	1	1	3	1
1488417	1	11	2	9	1	4	4	4	3	4	4	3	3	3	3	3	5	5	5	5	5	5	1	4	1	5	4	1	1	1	1	1	1	1	1	2	1	1	1	1	1	1	1	1	1	1	1	1	1
1491063	2	12	1	3	1	4	4	3	1	2	3	3	3	1	1	1	4	3	4	3	3	2	1	4	4	4	5	1	1	1	1	1	1	1	1	1	1	1	1	1	1	1	1	1	1	1	1	1	1
1491668	1	13	5	7	1	4	5	5	5	5	5	5	5	5	5	5	3	3	3	3	3	3	3	3	3	3	5	5	5	5	5	5	5	5	5	1	1	1	1	1	1	1	1	1	1	1	1	1	1
1492011	4	4	1	6	1	4	4	4	1	1	2	1	1	1	1	2	5	5	5	5	5	5	5	5	5	5	4	1	1	1	1	1	1	1	1	5	1	1	1	1	1	1	1	1	1	1	1	1	1
1492300	1	4	2	6	1	4	3	3	3	3	3	3	3	3	3	3	5	5	5	5	5	5	5	5	5	5	4	2	1	1	1	1	1	1	1	2	2	1	1	1	1	1	1	1	1	1	1	1	1
1492453	1	13	2	9	1	4	5	5	2	5	5	2	2	2	2	2	5	5	5	5	5	5	5	5	5	5	1	1	1	1	1	1	1	1	1	1	1	1	1	1	1	1	1	1	1	1	1	1	1
1495694	3	12	1	4	1	4	4	5	2	4	2	2	2	3	3	3	5	5	5	5	5	5	5	5	5	5	5	1	1	1	1	1	1	1	1	1	1	1	1	1	1	1	1	1	1	1	1	1	1
1495712	3	8	2	4	1	4	4	4	1	3	1	1	1	1	1	2	5	5	5	5	5	5	5	5	5	5	4	1	1	1	1	1	1	1	1	3	1	1	1	1	1	1	1	1	1	1	1	1	1
1496008	1	13	5	3	1	4	4	4	1	3	3	2	2	2	2	2	5	5	5	5	5	5	5	5	5	4	1	4	1	1	1	1	1	1	1	1	1	1	1	1	1	1	1	1	1	1	1	1	1
1496890	2	6	1	4	1	4	5	3	3	4	4	2	2	2	3	4	3	5	5	5	4	5	5	5	5	5	4	2	1	1	1	1	1	1	1	1	1	1	1	1	1	1	1	1	1	1	1	1	1
1497314	2	8	1	5	1	4	4	4	1	4	2	1	1	1	1	1	4	5	5	4	4	4	2	3	3	4	4	1	1	1	1	1	1	1	1	1	1	1	1	1	1	1	1	1	1	1	1	1	1
1497381	1	4	1	6	1	4	2	2	1	2	1	1	2	1	1	2	1	3	2	2	4	3	3	2	2	3	2	3	2	2	3	2	3	3	3	1	3	2	2	3	2	2	3	3	3	4	4	3	4
1502253	2	12	1	6	1	4	3	3	2	3	3	2	2	2	2	2	4	5	4	4	5	5	5	5	5	5	4	1	1	1	1	1	1	1	1	1	1	1	1	1	1	1	1	1	1	1	1	1	1
1502294	4	4	1	6	1	4	4	4	4	4	4	4	3	3	3	3	5	4	4	5	4	4	4	3	3	4	1	1	1	1	1	1	1	1	1	1	1	1	1	1	1	1	1	1	1	1	1	1	1
1502417	2	12	1	3	1	4	4	4	2	3	2	2	2	2	2	2	3	5	5	5	4	5	5	5	5	4	2	2	1	1	1	1	1	1	1	1	1	1	1	1	1	1	1	1	1	1	1	1	1
1502518	3	13	2	6	1	4	4	4	4	4	4	4	2	1	1	1	3	3	3	3	3	3	3	2	3	3	5	5	5	5	5	5	5	5	5	1	1	1	1	1	1	1	1	1	1	1	1	1	1
1502550	2	8	1	2	1	4	5	5	1	5	2	1	1	4	1	2	5	5	4	4	4	4	4	4	4	5	2	1	1	1	1	1	1	1	1	1	1	1	1	1	1	1	1	1	1	1	1	1	1
1506280	1	13	5	7	1	4	3	4	1	2	1	1	1	1	1	2	3	5	5	4	3	5	1	5	5	5	3	5	1	1	1	1	1	1	1	5	1	1	1	1	1	1	1	1	1	1	1	1	1
1506922	2	8	2	4	1	4	4	3	1	1	3	1	1	3	3	4	1	3	1	3	2	3	1	4	1	5	2	5	1	1	1	1	1	1	1	1	1	1	1	1	1	1	1	1	1	1	1	1	1
1507046	2	12	1	7	1	4	4	3	2	2	2	1	1	1	1	1	5	5	5	5	5	5	5	5	5	5	2	1	1	1	1	1	1	1	1	1	1	1	1	1	1	1	1	1	1	1	1	1	1
1507190	4	5	1	3	1	4	5	5	5	5	5	5	5	5	5	5	5	5	5	5	5	5	5	5	5	5	1	1	1	1	1	1	1	1	1	1	1	1	1	1	1	1	1	1	1	1	1	1	1
1510128	4	4	1	3	1	4	4	4	4	4	4	4	4	4	4	4	5	5	5	5	5	5	5	5	5	5	1	1	1	1	1	1	1	1	1	1	1	1	1	1	1	1	1	1	1	1	1	1	1
1510881	3	2	1	4	1	4	3	4	3	3	3	3	2	1	1	4	5	5	4	4	4	5	4	5	5	5	4	3	1	1	1	1	1	1	1	1	1	1	1	1	1	1	1	1	1	1	1	2	1
1510885	3	5	2	6	1	4	5	4	1	2	2	1	1	1	1	3	5	4	4	3	4	2	1	2	2	2	4	1	1	1	1	1	1	1	1	1	1	1	1	1	1	1	1	1	1	1	1	1	1
1510916	5	5	1	3	1	4	4	4	2	4	3	2	2	1	3	2	5	5	5	5	5	3	4	3	4	5	4	1	1	1	1	1	1	1	1	3	1	3	1	1	3	1	1	1	1	3	3	1	1
1511246	2	13	1	3	1	4	4	2	1	1	1	1	1	1	1	1	5	5	5	3	3	1	2	1	3	5	4	2	1	1	1	1	1	1	1	3	1	2	2	2	5	1	1	1	1	1	1	1	1
1511594	2	12	1	6	1	4	3	4	1	3	3	1	1	1	1	1	4	5	5	5	5	4	4	5	5	5	2	1	1	1	1	1	1	1	1	3	1	1	1	1	1	1	1	1	1	1	1	1	1
1514021	6	7	1	6	1	4	4	4	1	3	3	3	1	2	2	2	5	5	5	5	5	5	5	5	5	5	1	1	1	1	1	1	1	1	1	1	1	1	1	1	1	1	1	1	1	1	1	1	1
1514164	3	6	2	6	1	4	4	4	1	2	2	1	1	1	1	1	5	5	5	5	5	5	5	5	5	5	2	1	1	1	1	1	1	1	1	1	1	1	1	1	1	1	1	1	1	1	1	1	1
1514956	2	13	5	4	1	4	5	5	3	5	3	3	3	2	3	2	4	5	4	4	4	4	4	4	4	4	5	5	5	5	5	5	5	5	5	3	3	1	1	1	1	1	1	1	1	1	1	2	2
1518250	3	8	1	3	1	4	4	4	2	2	2	2	2	1	1	3	5	5	5	5	5	5	5	5	4	5	3	1	1	1	1	1	1	1	1	3	1	1	1	1	1	1	1	1	1	1	1	1	1
1518365	4	4	1	7	1	4	4	4	2	2	2	2	2	2	2	2	5	5	5	5	5	5	5	5	5	5	5	1	1	1	1	1	1	1	1	3	1	1	1	1	1	1	1	1	1	1	1	1	1
1518683	2	7	1	3	1	4	5	5	1	3	2	2	2	1	1	1	4	5	5	5	5	5	5	5	5	5	5	3	1	1	1	1	1	1	1	2	1	1	1	1	1	1	1	1	1	1	1	1	1
1519064	3	8	1	3	1	4	4	4	1	3	2	1	1	1	1	2	5	5	5	4	5	5	3	5	4	2	4	1	1	1	1	1	1	1	1	3	1	1	1	1	3	3	1	1	1	1	1	1	1
1519874	2	7	2	6	1	4	4	3	2	2	2	2	2	5	2	3	4	4	4	4	5	5	5	5	5	5	4	1	1	1	1	1	1	1	1	2	1	1	1	1	1	1	1	1	1	1	1	1	1
1520089	2	4	2	4	1	4	5	4	1	5	4	1	1	1	1	1	5	4	4	4	4	3	4	5	5	5	2	2	1	1	1	1	1	1	1	5	1	1	1	1	1	4	1	1	1	1	1	1	1
1523687	1	13	2	2	1	4	4	4	2	2	4	3	4	5	1	1	3	4	5	4	5	5	3	3	4	4	1	3	1	1	1	1	1	1	1	1	1	1	1	1	1	1	1	1	1	1	1	1	1
1524676	4	13	1	3	1	4	4	3	3	3	3	2	2	2	2	2	5	5	5	5	5	5	5	5	5	5	5	1	1	1	1	1	1	1	1	3	1	1	1	1	1	1	1	1	1	1	1	1	1
1525284	2	12	1	5	1	4	3	3	3	3	3	3	3	3	3	3	3	3	3	3	3	3	3	3	3	3	1	1	1	1	1	1	1	1	1	1	1	1	1	1	1	1	1	1	1	1	1	1	1
1525904	3	8	1	5	1	4	4	4	3	4	3	3	3	3	3	3	5	5	5	5	5	5	5	5	5	5	5	1	1	1	1	1	1	1	1	1	1	1	1	1	1	1	1	1	1	1	1	1	1
1529014	3	13	2	3	1	4	3	3	1	2	2	1	1	1	1	2	3	5	5	4	4	4	3	4	5	5	4	1	1	1	1	1	1	1	1	1	1	1	1	1	1	1	1	1	1	1	1	1	1
1529434	3	4	1	6	1	4	2	2	3	2	3	2	3	1	1	2	5	5	5	5	5	5	5	5	5	5	1	1	1	1	1	1	1	1	1	4	1	1	1	1	1	1	1	1	1	1	1	1	1
1529939	2	5	1	9	1	4	4	3	2	4	3	1	1	1	5	2	4	4	4	4	4	4	4	4	4	4	5	1	1	1	1	1	1	1	1	1	1	1	1	1	1	1	1	1	1	1	1	1	1
1534626	2	12	1	6	1	4	4	4	2	3	3	1	1	3	1	1	5	5	5	5	5	5	5	5	5	5	4	1	1	1	1	1	1	1	1	1	1	1	1	1	1	1	1	1	1	1	1	1	1
1534986	6	2	1	4	1	4	3	3	3	3	3	3	3	3	3	3	3	3	3	3	3	3	3	3	3	3	5	4	1	1	1	1	1	1	1	5	2	2	2	2	2	2	2	2	2	1	1	1	1
1535241	4	2	2	2	1	4	4	1	1	4	1	1	1	1	4	4	5	5	5	5	5	5	5	5	5	5	4	4	1	1	1	1	1	1	1	2	1	1	1	1	1	1	1	1	1	3	1	1	1
1535326	2	11	1	6	1	4	4	4	3	3	3	2	2	3	3	3	5	5	5	5	5	5	5	5	5	5	5	5	1	1	1	1	1	1	1	3	1	1	1	1	1	1	1	1	1	1	1	1	1
1535689	4	5	1	7	1	4	2	2	1	1	2	1	1	1	1	2	5	5	5	5	5	5	5	5	5	5	2	1	1	1	1	1	1	1	1	1	1	1	1	1	1	1	1	1	1	1	1	1	1
1535709	3	13	1	6	1	4	4	4	1	4	4	2	1	3	3	4	3	5	4	5	3	5	4	5	5	3	5	1	1	1	1	1	1	1	1	5	1	1	1	1	2	1	1	1	2	2	1	1	1
1536014	3	4	1	7	1	4	4	2	1	1	2	1	1	1	1	1	5	5	5	5	4	5	5	5	5	5	5	1	1	1	1	1	1	1	1	5	1	1	1	1	1	1	1	1	1	1	1	1	1
1536015	3	13	2	6	1	4	1	1	1	3	1	1	1	1	1	1	5	1	2	1	1	1	1	1	1	1	1	5	1	1	1	1	1	1	1	5	1	1	1	1	1	1	1	1	1	1	1	1	1
1536273	4	5	1	3	1	4	5	5	2	4	4	2	2	2	2	3	5	4	4	4	4	4	3	4	3	4	2	1	1	1	1	1	1	1	1	2	1	1	1	1	1	1	1	1	1	1	1	1	1
1536292	5	3	1	4	1	4	5	5	3	5	5	3	3	3	3	3	5	1	3	2	2	2	2	3	3	3	5	5	1	1	1	1	1	1	1	5	1	1	1	1	1	1	1	1	1	1	1	1	1
1536713	3	5	1	3	1	4	3	3	3	3	3	3	3	3	3	3	5	5	5	5	5	5	5	5	5	5	1	1	1	1	1	1	1	1	1	3	1	1	1	1	1	1	1	1	1	1	1	1	1
1539010	2	12	1	3	1	4	4	4	3	4	3	2	2	1	1	2	4	5	5	5	4	5	4	5	4	4	2	2	1	1	1	1	1	1	1	1	1	1	1	1	1	1	1	1	1	1	1	1	1
1540009	3	1	1	6	2	4	3	3	2	2	2	1	1	2	2	1	5	5	5	4	5	5	5	5	5	5	5	1	1	1	1	1	1	1	1	5	1	2	1	1	2	2	1	1	2	1	1	1	1
1540593	2	5	1	9	1	4	5	4	3	5	4	2	2	3	4	2	5	5	5	5	5	5	5	5	5	5	4	1	1	1	1	1	1	1	1	5	5	5	5	5	5	5	5	5	5	5	5	5	5
1540963	3	7	1	4	1	4	2	2	1	2	2	1	1	1	2	2	5	5	5	5	5	5	5	5	5	5	4	1	1	1	1	1	1	1	1	3	1	1	1	1	1	1	1	1	1	1	1	1	1
1540976	6	8	1	5	1	4	4	4	4	4	4	4	4	4	4	4	4	4	4	4	4	4	4	4	4	4	5	5	5	5	5	5	5	5	5	1	1	1	1	1	1	1	1	1	1	1	1	1	1
1541261	1	5	2	9	1	4	2	1	1	2	1	1	1	1	1	4	5	5	5	5	5	5	5	5	5	5	2	1	1	1	1	1	1	1	1	1	1	1	1	1	1	1	1	1	1	1	1	1	1
1542520	2	5	2	5	1	4	4	3	3	3	3	3	3	1	3	3	5	5	5	5	5	5	5	5	5	5	2	3	1	1	1	1	1	1	1	5	1	4	4	4	1	1	1	1	1	1	1	4	4
1544512	2	3	5	2	1	4	3	3	3	3	3	3	3	3	3	3	5	5	5	5	5	5	5	5	5	5	1	1	1	1	1	1	1	1	1	1	1	1	1	1	1	1	1	1	1	1	1	1	1
1545550	3	5	1	9	1	4	3	5	3	1	5	1	1	1	1	2	1	2	3	2	3	3	2	2	2	1	4	1	1	1	1	1	1	1	1	1	1	1	1	1	1	1	1	1	1	1	1	1	1
1546123	4	5	1	6	1	4	3	2	1	2	1	1	1	1	1	2	5	5	5	5	5	5	5	5	5	5	4	1	1	1	1	1	1	1	1	1	1	1	1	1	1	1	1	1	1	1	1	1	1
1546544	2	7	5	2	2	4	4	4	2	3	2	1	1	3	3	3	5	5	5	5	5	5	5	5	5	5	5	1	1	1	1	1	1	1	1	3	1	1	1	1	1	1	1	1	1	1	1	3	1
1547407	2	4	1	6	1	4	4	4	1	2	2	2	2	2	2	2	4	5	5	5	5	5	5	5	5	4	4	1	1	1	1	1	1	1	1	5	1	3	4	1	5	3	1	1	2	2	2	2	4
1548610	2	12	3	5	1	4	5	4	2	5	5	4	4	1	1	3	1	2	4	3	3	5	5	5	5	5	1	1	1	1	1	1	1	1	1	1	1	1	1	1	1	1	1	1	1	1	1	1	1
1549054	3	1	1	4	1	4	5	5	3	3	4	1	1	1	1	3	5	5	5	5	5	5	5	5	5	5	5	1	1	1	1	1	1	1	1	3	1	1	1	1	1	1	1	1	1	1	1	1	1
1552100	1	12	3	5	1	4	5	5	3	5	5	3	3	1	1	3	5	5	5	5	5	5	1	4	4	5	2	4	1	1	1	1	1	1	1	1	1	1	1	1	1	1	1	1	1	1	1	1	1
1552403	4	12	1	9	1	4	4	4	1	1	4	1	1	1	1	1	5	5	5	5	5	5	5	5	5	5	3	3	1	1	1	1	1	1	1	1	1	1	1	1	1	1	1	1	1	1	1	1	1
1552417	4	4	1	4	1	4	4	4	3	4	4	3	3	3	3	3	4	5	5	4	4	5	5	5	5	5	4	1	1	1	1	1	1	1	1	4	1	1	1	1	1	1	1	1	1	1	1	1	1
1552690	3	12	1	3	1	4	4	5	3	4	4	3	3	2	2	2	3	5	5	4	5	5	5	5	5	5	1	1	1	1	1	1	1	1	1	1	1	1	1	1	1	1	1	1	1	1	1	1	1
1552836	2	4	1	5	1	4	4	3	1	2	1	1	1	1	1	1	5	5	5	5	5	5	5	5	5	5	2	1	1	1	1	1	1	1	1	3	1	1	1	1	1	1	1	1	1	1	1	1	1
1553021	2	12	1	4	1	4	5	4	2	4	5	3	3	3	3	4	4	5	4	3	3	4	5	3	4	4	2	1	1	2	1	1	1	1	1	1	1	1	1	1	1	1	1	1	1	1	1	1	1
1554356	2	12	1	4	1	4	4	4	1	2	1	1	1	1	1	3	5	5	5	4	5	5	5	5	5	5	4	1	1	1	1	1	1	1	1	1	1	1	1	1	1	1	1	1	1	1	1	1	1
1554457	4	5	1	9	1	4	3	3	2	3	3	2	3	2	3	2	4	4	3	3	4	4	4	3	4	3	3	3	3	3	3	3	3	3	3	3	2	2	1	2	2	2	2	2	2	3	2	2	3
1554556	2	12	1	3	1	4	5	5	2	5	5	2	2	5	3	3	5	5	5	5	5	5	5	5	5	5	4	1	1	1	1	1	1	1	1	1	1	1	1	1	1	1	1	1	1	1	1	1	1
1554848	4	2	1	6	1	4	4	4	1	1	3	1	1	1	1	2	3	3	4	3	3	3	3	4	4	4	4	1	1	1	1	1	1	1	1	1	1	1	1	1	1	1	1	1	1	1	1	1	1
1555125	4	6	2	2	1	4	1	1	1	1	1	1	1	1	1	1	5	5	5	5	5	4	3	5	5	5	1	1	1	1	1	1	1	1	1	1	1	1	1	1	1	1	1	1	1	1	1	1	1
1558289	3	12	1	4	1	4	4	4	1	2	3	1	1	1	1	1	5	5	5	5	5	5	3	5	5	5	2	1	1	1	1	1	1	1	1	1	1	1	1	1	1	1	1	1	1	1	1	1	1
1558486	3	12	1	4	1	4	4	3	1	1	2	1	1	2	1	1	5	5	5	5	5	5	5	5	5	5	4	5	5	5	5	5	5	5	5	5	1	5	1	1	1	1	1	1	1	1	1	1	1
1558533	2	12	1	6	1	4	5	4	2	3	3	1	1	3	1	4	4	5	5	5	4	5	5	5	5	5	1	1	1	1	1	1	1	1	1	1	1	1	1	1	1	1	1	1	1	1	1	1	1
1558841	1	8	5	7	1	4	3	3	3	3	3	3	3	3	3	1	5	5	5	5	5	5	5	5	5	5	1	1	1	1	1	1	1	1	1	1	1	1	1	1	1	1	1	1	1	1	1	1	1
1559106	5	6	1	3	1	4	4	5	1	3	3	3	3	3	3	3	4	5	3	3	5	5	5	5	5	5	2	1	1	1	1	1	1	1	1	1	1	1	1	1	1	1	1	1	1	1	1	1	1
1559157	2	4	1	6	2	4	1	1	1	1	1	1	1	1	1	1	5	5	5	5	5	5	5	5	5	5	4	1	1	1	1	1	1	1	1	5	1	1	1	1	1	1	1	1	1	1	1	1	1
1559197	1	7	2	4	2	4	2	2	1	1	2	1	1	1	1	1	5	5	5	5	5	5	5	5	5	5	5	1	1	1	1	1	1	1	1	3	1	1	1	1	1	1	1	1	1	1	1	1	1
1559271	2	11	1	7	1	4	4	4	2	4	3	3	3	3	3	3	5	5	5	5	5	5	5	5	5	5	2	1	1	1	1	1	1	1	1	3	3	1	1	1	1	1	1	1	1	1	1	1	1
1560031	1	5	2	6	1	4	5	4	3	4	3	2	2	3	3	4	4	5	4	4	4	5	3	3	3	3	4	1	1	1	1	1	1	1	1	1	1	1	1	1	1	1	1	1	1	1	1	1	1
1560462	2	12	1	2	1	4	4	4	4	4	4	4	4	3	3	3	4	5	5	5	5	5	5	5	5	5	5	1	1	1	1	1	1	1	1	3	1	1	1	1	5	1	1	1	1	1	1	1	1
1563486	3	8	3	7	1	4	4	4	2	2	2	2	2	1	1	3	4	4	4	4	4	5	4	5	5	5	4	1	1	1	1	1	1	1	1	2	1	1	1	1	1	1	1	1	1	1	1	1	1
1566056	2	4	1	6	1	4	2	4	1	1	1	1	1	1	1	2	5	5	5	5	5	5	5	5	5	5	5	1	1	1	1	1	1	1	1	5	1	2	1	1	1	5	1	1	1	2	1	1	1
1566820	2	12	1	3	1	4	4	4	3	4	4	2	2	1	1	1	5	5	5	5	5	5	5	5	5	5	2	2	1	1	1	1	1	1	1	3	1	1	1	1	1	1	1	1	1	1	1	1	1
1570467	2	12	1	2	1	4	5	5	4	4	3	3	3	3	3	3	5	5	5	5	5	5	5	5	5	5	1	1	1	1	1	1	1	1	1	1	1	1	1	1	1	1	1	1	1	1	1	1	1
1570637	4	4	1	6	1	4	5	5	3	3	3	3	3	3	3	3	5	5	5	5	5	5	5	5	5	5	1	1	1	1	1	1	1	1	1	1	1	1	1	1	1	1	1	1	1	1	1	1	1
1570763	3	7	1	6	1	4	4	3	1	4	2	1	2	1	1	3	5	5	5	5	4	5	3	4	4	5	1	1	1	1	1	1	1	1	1	5	1	1	1	1	5	1	1	1	1	1	1	2	1
1571864	4	5	1	5	1	4	5	5	1	4	1	1	1	1	1	1	5	5	5	5	5	5	5	5	5	5	4	1	1	1	1	1	1	1	1	1	1	1	1	1	1	1	1	1	1	1	1	1	1
1572316	3	13	1	4	1	4	4	4	2	3	4	2	1	2	2	2	5	5	5	5	5	5	4	4	4	1	3	1	1	1	1	1	1	1	1	1	1	1	1	1	1	1	1	1	1	1	1	1	1
1572348	2	11	1	3	1	4	5	5	2	5	5	2	2	2	2	2	5	5	5	5	4	5	5	5	5	4	3	2	1	1	1	1	1	1	1	3	1	1	1	1	1	1	1	1	1	1	1	2	1
1572627	2	12	1	3	1	4	4	3	1	1	1	1	1	1	1	1	5	5	5	5	5	5	5	5	5	5	4	1	1	1	1	1	1	1	1	1	1	1	1	1	1	1	1	1	1	1	1	1	1
1573864	2	13	1	3	1	4	5	5	3	5	3	2	1	1	1	2	5	5	5	5	5	5	5	5	5	5	5	1	1	1	1	1	1	1	1	1	1	1	1	1	1	1	1	1	1	1	1	1	1
1574128	2	13	2	1	1	4	4	3	1	3	3	1	1	3	3	3	5	1	5	1	1	1	1	1	1	5	1	1	1	1	1	1	1	1	1	1	1	1	1	1	1	1	1	1	1	1	1	1	1
1575852	2	12	1	3	1	4	5	4	1	2	1	1	1	1	1	1	5	5	5	5	5	4	4	5	5	5	1	1	1	1	1	1	1	1	1	1	1	1	1	1	1	1	1	1	1	1	1	1	1
1577963	1	4	2	9	1	4	1	1	1	1	1	1	1	2	1	2	1	3	4	4	4	2	1	1	1	1	2	2	1	1	1	1	1	1	1	2	1	1	1	1	1	1	1	1	1	1	1	1	1
1578293	2	12	1	4	1	4	4	4	2	2	2	1	1	1	1	3	5	5	5	5	5	5	4	5	5	5	4	1	1	1	1	1	1	1	1	1	1	1	1	1	1	1	1	1	1	1	1	1	1
1578410	2	1	1	4	2	4	4	1	1	4	1	1	1	1	1	4	5	5	5	5	5	5	5	5	5	5	5	1	1	1	1	1	1	1	1	3	1	1	1	1	1	1	1	1	1	1	1	1	1
1578471	4	5	2	6	1	4	2	2	2	2	3	3	3	2	2	4	5	5	5	4	4	4	3	3	3	3	1	1	1	1	1	1	1	1	1	2	2	2	2	1	1	1	1	1	1	1	1	1	1
1580688	2	1	1	6	1	4	4	4	2	4	4	2	2	1	1	4	5	5	5	5	5	5	5	5	5	5	2	1	1	1	1	1	1	1	1	3	1	5	5	1	1	1	1	1	1	1	1	1	1
1581754	2	8	1	5	1	4	5	5	2	5	4	1	1	4	3	4	4	5	5	4	5	4	4	5	4	4	2	1	1	1	1	1	1	1	1	5	1	4	4	4	1	1	1	1	1	1	1	1	1
1581796	1	11	2	5	1	4	3	2	1	2	1	1	1	1	1	1	5	5	5	5	5	5	5	5	5	5	1	1	1	1	1	1	1	1	1	1	1	1	1	1	1	1	1	1	1	1	1	1	1
1586840	1	8	2	6	1	4	4	3	3	4	3	2	2	4	3	3	4	5	4	5	5	5	4	5	5	4	4	1	1	1	1	1	1	1	1	1	1	1	1	1	1	1	1	1	1	1	1	1	1
1603108	3	4	1	9	1	4	4	4	2	4	2	2	1	1	1	2	5	5	5	5	5	5	5	5	5	5	4	1	1	1	1	1	1	1	1	5	1	1	1	1	1	1	1	1	1	1	1	2	1
1604047	3	5	1	6	1	4	3	2	3	2	3	2	2	4	4	4	4	5	5	5	5	5	5	5	5	5	2	1	1	1	1	1	1	1	1	3	1	1	1	1	1	1	1	1	1	1	1	1	1
1605120	3	12	1	6	1	4	4	5	2	4	4	1	1	1	1	1	3	4	3	3	4	5	5	5	5	5	4	5	1	1	1	1	1	1	1	1	1	1	1	1	1	1	1	1	1	1	1	1	1
1605550	2	5	1	2	1	4	3	3	1	2	3	1	1	2	1	3	5	5	5	5	5	5	5	5	5	5	1	1	1	1	1	1	1	1	1	3	1	1	1	1	1	1	1	1	1	1	1	1	1
1605846	2	4	1	7	1	4	3	4	1	4	3	1	1	3	3	3	5	5	5	5	5	5	5	5	5	5	4	1	1	1	1	1	1	1	1	3	2	1	1	1	1	1	1	1	1	1	1	1	1
1607521	1	11	2	3	1	4	5	5	5	5	4	3	3	3	3	3	4	5	4	4	4	5	4	5	5	5	4	1	1	1	1	1	1	1	1	3	1	1	1	1	1	1	1	1	1	1	1	1	1
1608824	2	11	1	6	1	4	4	3	2	2	3	1	1	1	1	2	5	5	5	5	5	5	5	5	5	5	4	1	1	1	1	1	1	1	1	3	1	1	1	1	1	1	1	1	1	1	1	1	1
1608846	2	12	1	5	1	4	4	4	3	3	4	4	3	3	3	4	2	3	2	2	4	3	2	3	3	3	4	2	1	1	1	1	1	1	1	1	1	1	1	1	1	1	1	1	1	1	1	1	1
1609097	2	13	2	6	1	4	4	3	1	4	3	1	1	1	1	1	2	1	1	1	1	2	1	1	1	4	2	1	1	1	1	1	1	1	1	1	1	1	1	1	1	1	1	1	1	1	1	1	1
1609107	3	4	1	9	1	4	4	4	2	2	2	2	2	2	2	2	5	5	5	5	5	5	5	5	5	5	4	1	1	1	1	1	1	1	1	1	1	1	1	1	1	1	1	1	1	1	1	1	1
1609347	2	8	2	3	1	4	5	5	2	5	4	2	2	1	1	5	4	4	3	3	3	3	3	4	4	5	1	1	1	1	1	1	1	1	1	1	1	1	1	1	1	1	1	1	1	1	1	1	1
1609398	4	5	1	9	1	4	4	4	2	2	3	1	2	3	3	3	5	5	5	5	5	5	5	5	5	5	5	2	1	1	1	1	1	1	1	3	1	1	1	1	2	1	1	1	1	1	1	2	1
1609924	1	5	2	6	1	4	3	5	2	2	3	1	1	1	1	1	1	1	1	1	1	1	1	1	1	2	5	2	1	1	1	1	1	1	1	5	1	5	1	1	1	1	1	1	1	1	1	1	1
1611207	3	2	2	6	1	4	2	5	1	2	3	1	1	1	1	3	5	5	5	5	5	5	5	5	5	5	4	1	1	1	1	1	1	1	1	1	1	1	1	1	1	1	1	1	1	1	1	1	1
1611585	3	8	1	4	1	4	5	4	2	4	4	2	2	1	3	3	5	5	5	5	5	5	5	5	5	5	4	1	1	1	1	1	1	1	1	1	1	1	1	1	1	1	1	1	1	1	1	1	1
1611726	3	8	1	5	1	4	4	2	1	1	1	1	1	1	1	1	5	5	5	5	5	5	5	5	5	5	5	1	1	1	1	1	1	1	1	3	3	3	3	3	3	5	3	1	1	4	1	1	1
1612768	2	13	1	3	1	4	4	3	2	2	2	1	1	1	1	3	5	5	5	5	5	5	5	5	4	4	5	1	1	1	1	1	1	1	1	3	1	1	1	1	1	1	1	1	1	1	1	1	1
1613408	3	2	2	2	1	4	4	1	1	1	1	1	1	1	1	1	1	2	2	2	2	2	1	1	1	5	4	5	1	1	1	1	1	1	1	5	2	4	1	1	1	1	1	1	3	4	1	1	2
1613569	1	5	2	6	1	4	5	2	1	4	3	1	1	1	1	4	3	5	4	4	4	2	1	2	2	2	4	2	1	1	1	1	1	1	1	1	1	1	1	1	1	1	1	1	1	1	1	1	1
1614394	1	8	2	6	1	4	5	5	4	3	4	2	2	1	1	1	3	4	3	3	2	5	1	2	2	2	3	5	1	1	1	1	1	1	1	1	1	1	1	1	1	1	1	1	1	1	1	1	1
1615053	3	5	1	6	1	4	3	3	3	3	3	3	3	3	3	3	5	5	5	5	5	5	5	5	5	5	4	2	1	1	1	1	1	1	1	2	1	1	1	1	1	1	1	1	1	1	1	1	1
1615430	1	5	2	3	1	4	4	3	2	2	2	1	2	1	1	1	5	5	5	5	5	5	5	5	5	5	3	3	1	1	1	1	1	1	1	1	1	1	1	1	1	1	1	1	1	1	1	1	1
1616581	2	12	1	3	1	4	5	2	2	4	3	2	2	4	3	3	3	4	4	3	3	5	5	5	5	5	4	2	1	1	1	1	1	1	1	1	1	1	1	1	1	1	1	1	1	1	1	1	1
1616797	2	8	1	5	1	4	5	5	1	3	5	1	1	3	3	3	5	5	5	5	5	5	5	5	5	5	1	1	1	1	1	1	1	1	1	1	1	1	1	1	1	1	1	1	1	1	1	1	1
1617266	2	2	1	6	1	4	4	4	3	4	4	2	2	2	2	2	4	4	4	4	4	5	5	4	4	4	5	1	1	1	1	1	1	1	1	5	2	1	1	1	1	1	1	1	1	1	1	2	2
1618506	1	5	2	6	2	4	5	4	1	4	1	1	1	3	3	4	5	5	5	5	5	5	5	5	5	5	4	1	1	1	1	1	1	1	1	3	1	1	1	1	2	1	1	1	1	1	1	2	1
1619741	4	5	1	3	1	4	4	1	1	3	1	1	1	1	1	3	5	5	5	5	5	5	5	5	5	5	4	1	1	1	1	1	1	1	1	1	1	1	1	1	1	1	1	1	1	1	1	1	1
1621608	4	4	1	6	1	4	2	2	1	1	1	1	1	1	1	1	5	5	5	5	5	5	5	5	5	5	5	1	1	1	1	1	1	1	1	3	1	2	2	1	5	2	1	1	1	1	1	1	1
1623098	1	5	2	9	1	4	4	4	1	2	3	1	1	1	1	1	5	5	5	5	5	5	5	5	5	5	2	1	1	1	1	1	1	1	1	1	1	1	1	1	1	1	1	1	1	1	1	1	1
1623108	3	13	1	3	1	4	3	3	3	3	3	3	3	2	3	1	5	5	5	5	5	5	5	5	5	5	1	1	1	1	1	1	1	1	1	5	1	1	1	1	1	1	1	1	1	2	1	1	1
1623639	3	12	1	3	1	4	5	4	4	4	4	3	3	3	3	3	2	5	5	5	5	5	5	5	5	5	2	4	1	1	1	1	1	1	1	1	1	1	1	1	1	1	1	1	1	1	1	1	1
1625431	3	13	5	4	1	4	4	4	1	3	2	1	1	1	1	3	5	5	5	5	4	4	3	4	4	5	5	1	1	1	1	1	1	1	1	1	1	1	1	1	1	1	1	1	1	1	1	1	1
1625932	1	12	5	3	1	4	5	5	3	3	4	1	1	1	1	1	4	5	5	5	5	5	3	3	3	4	4	1	1	1	1	1	1	1	1	1	1	1	1	1	1	1	1	1	1	1	1	1	1
1627218	3	12	1	6	1	4	4	3	1	3	2	1	1	1	1	3	4	4	4	5	4	5	3	5	5	5	4	1	1	1	1	1	1	1	1	1	1	1	1	1	1	1	1	1	1	1	1	1	1
1627792	3	12	1	3	1	4	5	4	3	5	4	3	3	5	5	5	3	2	3	2	4	2	1	1	1	4	2	3	1	1	1	1	1	1	1	2	1	1	1	1	1	1	1	1	1	1	1	1	1
1629040	2	12	1	6	1	4	4	4	1	3	4	1	1	1	1	3	5	5	5	5	5	5	3	5	5	5	2	1	1	1	1	1	1	1	1	3	1	1	1	1	1	1	1	1	1	1	1	1	1
1629067	3	11	1	6	1	4	2	2	2	2	2	2	2	2	2	2	5	5	5	5	5	5	5	5	5	5	3	1	1	1	1	1	1	1	1	5	1	1	1	1	1	1	1	1	1	1	1	1	1
1629197	5	12	1	4	1	4	3	2	1	2	2	1	1	1	1	2	5	5	5	5	3	5	4	5	5	5	4	1	1	1	1	1	1	1	1	1	1	1	1	1	1	1	1	1	1	1	1	1	1
1629743	1	5	2	4	1	4	3	3	3	3	3	3	3	3	3	3	5	5	5	5	5	5	5	5	5	5	2	1	1	1	1	1	1	1	1	1	1	1	1	1	1	1	1	1	1	1	1	1	1
1630767	2	12	3	2	1	4	4	3	3	4	4	3	3	3	3	3	2	3	3	2	3	4	4	3	4	3	4	1	1	1	1	1	1	1	1	1	1	1	1	1	1	1	1	1	1	1	1	1	1
1630936	2	7	1	3	1	4	4	4	1	1	2	1	1	1	1	2	5	5	5	5	5	5	4	5	5	5	5	1	1	1	1	1	1	1	1	5	1	1	1	1	1	1	1	1	1	1	1	1	1
1631163	4	13	1	4	1	4	5	5	5	5	5	5	5	5	5	5	2	2	3	3	4	3	4	4	4	5	5	5	1	3	1	1	1	1	1	1	1	1	1	1	1	1	1	1	1	1	1	1	1
1631238	2	5	1	6	1	4	5	3	3	5	3	1	1	1	1	3	5	5	5	5	5	5	5	5	5	5	4	1	1	1	1	1	1	1	1	3	1	1	1	1	1	1	1	1	1	1	1	1	1
1635009	3	13	2	4	1	4	1	1	1	1	1	1	1	1	1	1	5	5	5	5	5	5	5	5	5	5	5	5	1	1	1	1	1	1	1	5	1	1	1	1	1	1	1	1	1	1	1	1	1
1635013	2	12	1	2	1	4	3	3	3	3	3	3	3	3	3	3	5	5	5	5	5	5	5	5	5	5	1	1	1	1	1	1	1	1	1	1	1	1	1	1	1	1	1	1	1	1	1	1	1
1635121	3	12	1	3	1	4	5	5	3	5	4	3	3	1	1	4	3	3	3	4	4	5	5	5	5	5	4	1	1	1	1	1	1	1	1	1	1	1	1	1	1	1	1	1	1	1	1	1	1
1635300	2	12	1	2	1	4	5	4	3	3	4	3	3	3	3	3	3	3	3	3	3	3	2	2	2	5	1	1	1	1	1	1	1	1	1	1	1	1	1	1	1	1	1	1	1	1	1	1	1
1635320	1	2	2	6	1	4	4	4	3	4	4	3	3	1	3	4	4	4	4	4	5	4	3	4	3	4	1	1	1	1	1	1	1	1	1	3	1	1	1	1	1	1	1	1	1	2	1	1	5
1636554	2	13	3	3	1	4	3	4	3	3	3	2	2	2	2	2	5	5	5	5	5	5	5	5	5	5	5	1	1	1	1	1	1	1	1	1	1	1	1	1	1	1	1	1	1	1	1	1	1
1636880	1	13	2	2	1	4	5	5	4	5	3	3	3	3	5	5	5	5	5	5	5	5	5	5	5	5	5	1	1	1	1	1	1	1	1	1	1	1	1	1	1	1	1	1	1	1	1	1	1
1636925	1	8	2	9	1	4	4	4	4	4	4	3	3	3	3	3	2	2	2	2	2	2	2	2	2	2	1	1	1	1	1	1	1	1	1	1	1	1	1	1	1	1	1	1	1	1	1	1	1
1636962	1	5	2	6	1	4	3	3	1	1	1	1	1	1	1	1	5	5	4	4	4	5	5	5	5	5	2	1	1	1	1	1	1	1	1	3	1	1	1	1	1	1	1	1	1	1	1	1	1
1638417	2	5	1	6	1	4	5	5	1	3	5	1	1	1	1	2	5	5	5	5	5	5	5	5	5	5	1	1	1	1	1	1	1	1	1	1	1	1	1	1	1	1	1	1	1	1	1	1	1
1638512	2	5	1	3	1	4	4	4	4	4	4	4	3	3	4	3	4	4	4	4	4	4	4	4	4	2	2	1	1	1	1	1	1	1	1	1	1	1	1	1	1	1	1	1	1	1	1	1	1
1638579	2	12	1	1	1	4	5	5	3	5	3	3	3	3	3	3	5	5	5	5	5	5	5	5	5	5	1	1	1	1	1	1	1	1	1	1	1	1	1	1	1	1	1	1	1	1	1	1	1
1638599	2	8	1	5	1	4	1	1	1	1	1	1	1	1	1	1	4	4	4	4	4	5	5	5	5	4	1	1	1	1	1	1	1	1	1	3	1	1	1	1	1	1	1	1	1	1	1	1	1
1638828	1	5	5	3	1	4	3	3	3	3	3	3	3	3	3	3	5	5	5	5	5	5	5	5	5	5	4	1	1	1	1	1	1	1	1	5	4	2	1	1	2	2	1	1	1	1	1	2	2
1639734	3	12	1	9	1	4	4	4	1	4	4	1	3	4	4	4	5	4	5	5	5	5	4	5	4	4	4	1	1	1	1	1	1	1	1	3	1	1	1	1	1	1	1	1	1	1	1	1	1
1642274	4	4	1	8	1	4	3	2	2	2	3	1	1	1	1	1	5	5	5	5	5	5	5	5	5	5	5	1	1	1	1	1	1	1	1	2	1	1	1	1	1	1	1	1	1	1	1	1	1
1642326	1	7	2	9	1	4	4	3	2	3	3	2	2	1	1	4	5	5	5	5	3	3	1	1	2	4	4	1	1	1	1	1	1	1	1	1	1	1	1	1	1	1	1	1	1	1	1	1	1
1642493	1	11	2	4	1	4	2	2	1	1	1	1	1	1	1	3	4	5	5	5	5	5	5	5	5	5	4	5	1	1	1	1	1	1	1	4	2	4	4	4	5	3	1	1	1	4	1	2	4
1643308	1	5	2	9	1	4	4	4	1	3	3	2	2	3	3	3	5	5	5	5	5	5	5	5	5	3	4	1	1	1	1	1	1	1	1	5	1	1	1	1	4	4	1	1	1	1	1	1	1
1644318	2	13	1	6	1	4	1	1	1	1	1	1	1	1	1	1	5	5	5	5	5	5	3	5	5	5	1	1	1	1	1	1	1	1	1	1	1	1	1	1	1	1	1	1	1	1	1	1	1
1645144	3	5	1	3	1	4	5	5	3	5	5	3	3	5	4	5	5	5	5	4	4	5	4	5	5	5	4	1	1	1	1	1	1	1	1	1	1	1	1	1	1	1	1	1	1	1	1	1	1
1645312	2	8	1	7	1	4	4	4	3	4	4	3	3	3	3	3	5	5	5	5	5	5	5	5	5	5	1	1	1	1	1	1	1	1	1	1	1	1	1	1	1	1	1	1	1	1	1	1	1
1645931	4	5	1	3	1	4	4	5	1	2	2	2	1	1	1	2	2	3	2	2	3	3	5	5	5	5	5	2	1	1	1	1	1	1	1	3	1	1	1	1	1	1	1	1	1	1	1	2	1
1647011	2	11	1	8	1	4	4	3	1	3	1	1	1	1	1	3	5	5	5	5	5	5	5	5	5	5	1	1	1	1	1	1	1	1	1	3	1	1	1	1	1	1	1	1	1	1	1	1	1
1647712	1	13	6	4	1	4	4	4	1	3	1	1	1	1	1	1	5	5	5	5	5	5	4	5	5	5	1	1	1	1	1	1	1	1	1	3	1	1	1	1	1	1	1	1	1	1	1	1	1
1647777	1	13	2	3	1	4	4	3	1	2	2	1	1	1	1	2	4	4	5	4	5	3	3	3	3	5	2	1	1	1	1	1	1	1	1	1	1	1	1	1	1	1	1	1	1	1	1	1	1
1647781	3	5	2	5	1	4	4	4	1	4	4	1	1	3	1	4	4	4	4	5	5	1	3	1	1	3	4	1	1	1	1	1	1	1	1	1	1	1	1	1	1	1	1	1	1	1	1	1	1
1647898	1	1	1	6	1	4	2	5	1	1	2	2	2	2	2	2	3	3	3	3	3	5	5	5	5	5	2	1	1	1	1	1	1	1	1	3	1	4	5	1	1	1	1	1	1	1	1	1	1
1647955	2	13	1	3	1	4	4	4	2	5	5	2	2	1	1	1	5	5	5	5	5	5	5	5	5	5	5	1	1	1	1	1	1	1	1	3	1	1	1	1	1	1	1	1	1	3	1	1	1
1649241	3	2	2	8	1	4	4	3	2	4	3	2	2	2	2	4	3	3	3	3	3	3	2	3	3	3	4	1	1	1	1	1	1	1	1	1	1	1	1	1	1	1	1	1	1	4	1	1	1
1649394	2	5	2	3	1	4	4	3	3	3	2	2	2	2	2	2	5	5	5	5	5	5	5	5	5	5	1	1	1	1	1	1	1	1	1	1	1	1	1	1	1	1	1	1	1	1	1	1	1
1650330	2	1	1	3	1	4	4	4	3	3	3	3	3	3	3	3	3	3	3	3	3	3	3	3	4	3	1	1	1	1	1	1	1	1	1	1	1	1	1	1	1	1	1	1	1	1	1	1	1
1653734	3	7	1	3	1	4	4	4	3	4	3	2	2	2	2	2	5	5	5	5	5	5	5	5	5	5	4	1	1	1	1	1	1	1	1	3	1	1	1	1	1	1	1	1	1	1	1	1	1
1654293	2	2	2	2	1	4	3	3	3	3	3	3	3	3	3	3	5	5	5	5	5	5	5	5	5	5	5	1	1	1	1	1	1	1	1	5	1	1	1	1	1	1	1	1	1	1	1	4	4
1669888	2	8	1	5	1	4	4	4	4	4	3	2	2	2	4	4	5	5	4	5	4	5	5	5	5	5	1	1	1	1	1	1	1	1	1	1	1	1	1	1	1	1	1	1	1	1	1	1	1
1678354	1	13	2	6	1	4	3	3	3	3	3	3	3	3	3	3	5	5	5	5	5	5	5	5	5	5	1	1	1	1	1	1	1	1	1	1	1	1	1	1	1	1	1	1	1	1	1	1	1
1687991	2	2	2	6	2	4	5	5	1	5	2	1	1	1	1	3	5	3	5	3	3	4	1	4	2	4	1	1	1	1	1	1	1	1	1	3	1	1	1	1	1	1	1	1	1	1	1	2	2
1689257	1	5	2	6	1	4	4	4	1	2	3	2	1	1	1	1	2	3	4	3	3	3	2	2	2	2	2	1	1	1	1	1	1	1	1	5	1	2	5	2	1	1	1	1	1	3	1	1	2
1691407	2	8	1	6	1	4	3	3	1	2	2	1	1	1	2	1	5	5	5	5	5	5	5	5	5	5	5	1	1	1	1	1	1	1	1	2	1	1	1	1	1	1	1	1	1	1	1	2	1
1700076	2	2	1	5	1	4	3	2	1	3	2	2	2	2	2	2	5	5	5	5	5	5	5	5	5	5	4	1	1	1	1	1	1	1	1	3	1	1	1	1	1	1	1	1	1	1	1	1	1
1700865	1	13	3	4	1	4	4	4	3	4	4	2	2	1	1	4	4	5	5	5	4	5	5	5	5	5	1	1	1	1	1	1	1	1	1	3	1	1	1	1	1	1	1	1	1	1	1	1	1
1701233	3	8	1	3	1	4	5	2	1	4	3	1	1	2	1	4	3	5	3	2	2	3	1	3	3	5	1	1	1	1	1	1	1	1	1	3	1	2	5	1	1	1	1	1	1	1	1	1	1
1702625	2	12	1	3	1	4	3	3	2	2	3	2	2	1	1	2	5	5	5	5	5	5	4	5	5	3	4	2	1	1	1	1	1	1	1	1	1	1	1	1	1	1	1	1	1	1	1	1	1
1703971	2	12	3	3	1	4	5	4	1	5	3	3	2	2	2	3	5	5	5	5	5	5	5	5	5	5	1	1	1	1	1	1	1	1	1	1	1	1	1	1	1	1	1	1	1	1	1	1	1
1704836	3	8	1	3	1	4	5	4	3	5	2	2	2	1	1	1	5	5	5	5	5	5	5	5	5	5	2	1	1	1	1	1	1	1	1	3	1	3	1	1	1	1	1	1	1	3	1	1	1
1710060	3	12	1	6	1	4	5	5	1	2	3	1	1	1	1	1	5	5	4	4	4	5	4	4	4	5	5	1	1	1	1	1	1	1	1	1	1	1	1	1	1	1	1	1	1	1	1	1	1
1716759	4	13	2	3	1	4	3	2	1	2	2	1	1	3	1	1	4	5	4	5	4	5	4	5	5	5	3	1	1	1	1	1	1	1	1	5	1	1	1	1	1	1	1	1	1	1	1	1	1
1719310	1	7	2	4	1	4	1	2	1	2	1	1	1	1	1	2	5	5	5	5	5	5	5	5	5	5	4	1	1	1	1	1	1	1	1	1	1	1	1	1	1	1	1	1	1	1	1	1	1
1721851	2	1	1	9	1	4	4	2	1	1	3	1	1	1	1	1	5	1	3	3	1	1	1	1	1	5	3	1	1	1	1	1	1	1	1	1	1	1	1	1	1	1	1	1	1	1	1	1	1
1722726	2	12	1	3	1	4	3	3	3	3	3	3	3	2	2	2	5	5	5	5	5	5	5	5	5	5	2	1	1	1	1	1	1	1	1	1	1	1	1	1	1	1	1	1	1	1	1	1	1
1736849	2	12	1	6	1	4	3	4	1	1	1	1	1	1	1	1	5	5	5	5	5	5	5	5	5	5	2	1	1	1	1	1	1	1	1	1	1	1	1	1	1	1	1	1	1	1	1	1	1
1736865	2	5	1	6	1	4	4	4	1	4	3	1	1	1	1	5	4	5	5	5	5	5	5	5	5	5	1	1	1	1	1	1	1	1	1	1	1	1	1	1	1	1	1	1	1	1	1	1	1
1739743	2	11	1	6	1	4	4	3	2	3	2	2	2	2	2	3	5	5	5	5	5	5	5	5	5	5	5	1	1	1	1	1	1	1	1	3	1	1	1	1	1	1	1	1	1	1	1	1	1
1745745	2	12	1	8	1	4	5	5	2	4	4	2	2	3	2	3	4	5	5	4	4	5	5	5	5	5	1	1	1	1	1	1	1	1	1	1	1	1	1	1	1	1	1	1	1	1	1	1	1
1749894	2	12	1	6	1	4	4	1	1	2	1	1	1	1	2	2	5	5	5	5	5	5	3	5	5	3	5	1	1	1	1	1	1	1	1	1	1	1	1	1	1	1	1	1	1	1	1	1	1
1753498	4	5	1	6	1	4	4	4	3	3	4	4	4	4	4	4	5	5	5	5	5	5	5	5	5	5	2	1	1	1	1	1	1	1	1	1	1	1	1	1	1	1	1	1	1	1	1	1	1
1755224	3	12	1	3	1	4	4	4	2	3	2	2	2	2	2	4	5	5	5	5	5	5	5	5	5	5	2	2	1	1	1	1	1	1	1	1	1	1	1	1	1	1	1	1	1	1	1	1	1
1762707	2	12	1	7	1	4	5	4	1	4	3	1	1	1	1	3	5	5	5	5	5	5	5	5	5	5	3	3	1	1	1	1	1	1	1	1	1	1	1	1	1	1	1	1	1	1	1	1	1
1765552	3	7	1	6	1	4	4	4	2	4	3	2	2	4	4	4	5	5	5	5	5	5	5	5	5	5	4	1	1	1	1	1	1	1	1	2	1	1	1	1	1	1	1	1	1	1	1	1	1
1770752	3	5	1	3	1	4	3	3	1	3	2	1	1	2	2	2	5	5	5	5	5	4	2	3	3	5	4	1	1	1	1	1	1	1	1	3	1	1	1	1	1	1	1	1	1	1	1	1	1
1775455	4	8	1	6	1	4	4	3	2	3	4	2	2	1	1	2	5	5	4	5	4	5	4	5	5	5	5	1	1	1	1	1	1	1	1	1	1	1	1	1	1	1	1	1	1	1	1	1	1
1775863	2	8	4	3	1	4	3	3	3	3	3	3	3	2	2	2	5	3	5	3	3	4	5	5	5	5	4	5	1	1	1	1	1	1	1	5	1	3	5	3	1	5	3	1	1	5	1	1	1
1783378	2	11	1	7	1	4	5	5	5	5	5	5	5	5	5	5	5	5	5	5	5	5	5	5	5	5	2	1	1	1	1	1	1	1	1	3	1	3	1	1	5	2	1	1	1	1	1	1	1
1788427	2	13	1	3	1	4	5	5	1	5	5	1	1	1	5	5	5	5	5	5	5	5	5	5	5	4	4	1	2	2	1	1	1	1	1	3	1	1	1	1	1	1	1	1	1	1	1	3	1
1792127	1	7	3	6	1	4	4	2	2	3	3	2	2	2	2	2	5	5	5	5	5	5	5	5	5	5	5	1	1	1	1	1	1	1	1	3	1	1	1	1	1	1	1	1	1	1	1	1	1
1794308	3	12	1	3	1	4	4	5	1	1	2	1	1	1	1	1	3	4	5	3	5	5	5	5	5	4	1	1	1	1	1	1	1	1	1	1	1	1	1	1	1	1	1	1	1	1	1	1	1
1794920	3	13	1	3	1	4	4	4	2	4	3	2	2	1	1	2	5	5	5	5	5	5	5	5	5	5	5	1	1	1	1	1	1	1	1	3	1	1	1	1	1	1	1	1	1	1	1	1	1
1811704	1	7	2	6	1	4	5	4	2	2	5	2	2	1	1	3	5	5	5	5	5	5	5	4	4	5	4	2	1	1	1	1	1	1	1	4	3	3	1	4	2	2	1	1	1	1	1	1	1
1812838	1	5	5	3	1	4	3	3	3	3	3	3	3	3	3	3	4	4	4	4	4	4	4	4	4	4	5	1	1	1	1	1	1	1	1	5	1	1	1	2	1	1	1	1	1	1	1	1	1
1813453	2	2	1	7	1	4	4	4	4	4	4	4	4	2	2	2	5	5	5	5	5	5	5	5	5	5	4	1	1	1	1	1	1	1	1	1	1	1	1	1	1	1	1	1	1	1	1	1	1
1813465	3	5	1	6	1	4	3	3	4	3	3	4	4	4	4	4	3	3	3	3	3	2	2	2	2	2	2	1	1	1	1	1	1	1	1	1	1	1	1	1	1	1	1	1	1	1	1	1	1
1813791	3	5	1	6	1	4	4	4	3	4	4	4	4	2	4	4	3	4	3	3	3	4	4	3	3	3	5	1	1	1	1	1	1	1	1	3	1	1	1	1	1	1	1	1	1	1	1	3	1
1821152	4	8	1	6	1	4	1	1	1	1	1	1	1	1	1	1	5	5	5	5	5	5	5	5	5	5	5	1	1	1	1	1	1	1	1	3	1	1	1	1	1	1	1	1	1	3	1	1	1
1822758	1	5	2	7	1	4	4	4	1	3	2	1	1	3	1	2	2	5	3	4	3	5	4	4	5	5	1	1	1	1	1	1	1	1	1	1	1	1	1	1	1	1	1	1	1	1	1	1	1
1823120	4	12	1	5	1	4	5	5	3	3	4	4	4	1	1	1	5	3	3	2	3	2	2	3	3	2	5	1	1	1	1	1	1	1	1	1	1	1	1	1	1	1	1	1	1	1	1	1	1
1824048	1	2	5	5	1	4	3	3	3	3	3	3	3	3	3	3	5	5	5	5	5	4	5	5	5	5	3	1	1	1	1	1	1	1	1	2	1	1	1	1	1	1	1	1	1	1	1	1	1
1827207	2	2	1	4	1	4	2	2	2	2	2	2	2	1	1	3	5	5	5	5	5	5	5	5	5	5	1	1	1	1	1	1	1	1	1	1	1	1	1	1	1	1	1	1	1	1	1	1	1
1830791	4	4	1	3	1	4	4	4	2	3	3	2	2	3	3	3	5	5	5	5	5	5	5	5	5	5	4	1	1	1	1	1	1	1	1	4	1	1	1	1	1	1	1	1	1	1	1	1	1
1832006	4	8	1	6	1	4	3	3	1	2	2	1	1	1	1	2	4	5	5	5	5	5	4	5	5	5	2	1	1	1	1	1	1	1	1	1	1	1	1	1	1	1	1	1	1	1	1	1	1
1837320	1	13	2	3	1	4	4	4	1	2	2	3	3	2	2	3	4	4	4	4	4	4	4	4	4	4	2	2	1	1	1	1	1	1	1	1	1	1	1	1	1	1	1	1	1	1	1	1	1
1838353	3	5	2	7	1	4	5	5	5	5	4	4	4	4	4	4	5	5	5	5	5	5	5	5	5	5	1	1	1	1	1	1	1	1	1	1	1	1	1	1	1	1	1	1	1	1	1	1	1
1840110	4	4	1	6	1	4	3	3	3	3	3	3	3	3	3	3	5	5	5	5	5	5	5	5	5	5	5	1	1	1	1	1	1	1	1	3	1	1	1	1	5	1	1	1	1	1	1	1	1
1843231	2	11	1	3	1	4	4	4	3	3	3	3	3	3	3	4	5	5	5	5	5	5	5	5	5	5	1	1	1	1	1	1	1	1	1	1	1	1	1	1	1	1	1	1	1	1	1	1	1
1843615	2	2	5	3	1	4	4	4	3	4	4	2	2	2	3	3	4	4	5	5	5	5	4	5	5	5	5	1	1	1	1	1	1	1	1	3	1	1	1	1	1	1	1	1	1	1	1	1	1
1845216	1	11	3	7	1	4	3	3	2	2	3	2	2	2	2	3	4	5	5	5	4	4	5	5	5	4	1	2	1	1	1	1	1	1	1	1	1	1	1	1	1	1	1	1	1	1	1	1	1
1852650	2	8	1	5	1	4	4	3	2	2	2	2	2	1	1	4	5	5	5	5	5	5	5	5	5	5	1	1	1	1	1	1	1	1	1	1	1	1	1	1	1	1	1	1	1	1	1	1	1
1852765	3	8	2	4	1	4	4	4	3	4	4	2	2	4	4	4	5	5	5	5	5	5	5	5	5	5	1	1	1	1	1	1	1	1	1	1	1	1	1	1	1	1	1	1	1	1	1	1	1
1852880	2	12	3	6	1	4	3	4	1	2	2	1	1	1	1	1	5	5	5	5	5	5	5	5	5	5	4	1	1	1	1	1	1	1	1	1	1	1	1	1	1	1	1	1	1	1	1	1	1
1853454	2	5	1	3	1	4	5	5	1	4	5	1	1	1	1	3	5	5	5	4	4	5	5	5	5	5	4	5	5	5	5	5	5	5	5	1	1	1	1	1	1	1	1	1	1	1	1	1	1
1855291	5	4	2	9	1	4	3	3	3	3	3	3	2	1	4	3	3	3	3	3	3	3	3	3	3	3	4	1	1	1	1	1	1	1	1	2	2	2	2	2	1	1	1	1	1	1	1	1	1
1862851	4	13	2	6	1	4	5	5	5	5	5	5	5	5	5	5	1	1	1	1	1	1	1	1	1	1	4	1	1	1	1	1	1	1	1	1	1	1	1	1	1	1	1	1	1	1	1	1	1
1863372	2	1	1	9	1	4	4	3	2	2	5	2	2	2	2	2	5	5	5	5	5	5	5	5	5	5	4	1	1	1	1	1	1	1	1	2	1	1	1	1	1	1	1	1	1	1	1	2	1
1865019	2	13	1	6	1	4	4	4	3	4	3	3	3	2	3	4	4	4	3	4	4	4	5	4	3	4	5	5	1	1	1	1	1	1	1	5	1	1	1	1	1	1	1	1	1	1	1	1	5
1873116	2	13	2	3	1	4	4	3	1	2	1	1	1	1	1	2	4	5	5	5	5	5	5	5	5	5	1	1	1	1	1	1	1	1	1	1	1	1	1	1	1	1	1	1	1	1	1	1	1
1880369	2	12	1	7	1	4	2	2	2	2	2	2	2	2	2	2	5	5	5	5	5	5	5	5	5	5	2	1	1	1	1	1	1	1	1	1	1	1	1	1	1	1	1	1	1	1	1	1	1
1889434	3	8	1	4	1	4	3	4	1	2	1	1	1	1	1	3	4	3	4	3	3	3	3	3	3	3	5	3	1	1	1	1	1	1	1	3	1	1	1	1	1	1	1	1	1	1	1	1	1
1890859	4	12	1	3	1	4	4	4	1	3	3	2	1	1	1	1	5	5	5	5	5	5	5	5	5	5	1	1	1	1	1	1	1	1	1	1	1	1	1	1	1	1	1	1	1	1	1	1	1
1894563	2	5	2	3	1	4	5	5	1	5	3	1	1	1	1	1	4	4	4	2	2	1	1	3	4	5	2	3	1	1	1	1	1	1	1	5	1	5	1	1	1	1	1	1	1	3	1	1	1
1898605	2	8	1	5	1	4	5	3	2	5	3	3	2	2	2	2	5	5	5	5	5	5	5	5	5	5	4	1	1	1	1	1	1	1	1	1	1	1	1	1	1	1	1	1	1	1	1	1	1
1901728	4	5	2	6	1	4	2	3	4	3	2	3	4	3	2	3	4	4	4	4	4	4	4	4	4	4	5	1	1	1	1	1	1	1	1	5	1	1	1	1	1	1	1	1	1	1	1	1	1
1902609	2	5	1	6	1	4	3	3	2	3	3	3	3	3	3	3	5	5	5	4	4	4	3	5	5	5	1	2	1	1	1	1	1	1	1	1	1	1	1	1	1	1	1	1	1	1	1	1	1
1903662	2	11	1	6	1	4	3	4	2	3	3	2	2	1	3	3	5	5	5	5	5	5	5	5	5	5	5	1	1	1	1	1	1	1	1	3	1	1	1	1	1	1	1	1	1	1	1	1	1
1906540	2	13	1	3	1	4	4	4	4	4	4	3	3	4	4	3	5	4	4	3	3	2	3	4	4	4	5	1	1	1	1	1	1	1	1	5	3	1	1	1	1	1	1	1	1	1	1	1	1
1906779	2	4	1	6	1	4	3	3	3	3	3	3	3	3	3	3	5	5	5	5	5	5	5	5	5	5	1	1	1	1	1	1	1	1	1	1	1	1	1	1	1	1	1	1	1	1	1	1	1
1907766	3	13	1	6	1	4	1	1	1	1	1	1	1	1	1	3	5	5	5	5	5	5	5	5	5	5	2	1	1	1	1	1	1	1	1	1	1	1	1	1	1	1	1	1	1	1	1	1	1
1910586	2	12	1	5	1	4	3	3	1	2	1	1	1	1	1	1	5	5	5	4	5	5	4	5	5	5	1	1	1	1	1	1	1	1	1	2	1	1	1	1	1	1	1	1	1	1	1	1	1
1914237	1	7	5	6	1	4	2	4	1	4	2	2	2	3	3	4	5	5	5	4	4	5	5	5	5	5	4	5	5	5	5	5	5	5	5	2	1	1	1	1	1	1	1	1	1	1	1	2	1
1914244	3	12	1	3	1	4	5	5	3	4	3	2	2	3	3	2	4	5	4	4	5	5	5	5	5	5	5	5	5	5	5	5	5	5	5	1	1	1	1	1	1	1	1	1	1	1	1	1	1
1920947	2	11	1	6	1	4	4	3	3	4	3	2	2	4	3	3	4	5	5	4	4	5	3	5	4	3	5	1	1	1	1	1	1	1	1	5	1	1	1	1	1	1	1	1	1	1	1	1	1
1923220	3	2	2	9	1	4	2	3	2	3	3	2	3	3	4	3	2	1	2	2	1	1	2	2	3	2	4	1	1	1	1	1	1	1	1	1	1	1	1	1	1	1	1	1	1	1	1	1	1
1923259	2	11	5	3	1	4	5	3	1	5	1	1	1	1	1	3	5	5	5	5	5	5	5	5	5	5	4	1	1	1	1	1	1	1	1	1	1	1	1	1	1	1	1	1	1	1	1	1	1
1923923	2	7	5	6	1	4	4	1	1	1	1	1	1	1	1	1	5	5	5	5	5	5	5	5	5	5	2	1	1	1	1	1	1	1	1	3	1	3	4	3	1	1	3	1	1	1	1	1	5
1928765	3	12	1	3	1	4	5	5	1	4	4	1	1	1	1	5	5	5	5	5	5	5	5	5	5	5	1	1	1	1	1	1	1	1	1	1	1	1	1	1	1	1	1	1	1	1	1	1	1
1930098	4	5	1	4	1	4	3	3	2	2	3	2	2	1	1	2	4	5	3	4	4	5	5	5	4	4	4	1	1	1	1	1	1	1	1	1	1	1	1	1	1	1	1	1	1	1	1	1	1
1932825	2	5	1	3	1	4	4	4	2	3	3	3	3	3	3	3	5	5	5	5	5	5	5	5	5	5	2	1	1	1	1	1	1	1	1	5	1	1	1	1	1	1	1	1	1	2	1	1	1
1933715	3	5	1	6	1	4	4	3	2	3	2	2	2	2	2	4	4	5	5	5	4	5	5	5	5	5	5	1	1	1	1	1	1	1	1	3	1	1	1	5	3	4	3	1	1	3	1	2	1
1941470	2	4	1	6	1	4	3	3	3	3	3	3	3	3	3	3	5	5	5	5	5	5	5	5	5	5	1	1	1	1	1	1	1	1	1	1	1	1	1	1	1	1	1	1	1	1	1	1	1
1941722	3	12	1	3	1	4	5	5	1	3	5	2	2	1	1	2	4	5	5	5	5	5	5	5	5	5	4	1	1	1	1	1	1	1	1	1	1	1	1	1	1	1	1	1	1	1	1	1	1
1942687	2	1	1	5	1	4	3	3	3	2	3	2	3	1	1	3	5	4	4	5	5	5	5	5	5	5	5	1	1	1	1	1	1	1	1	4	1	1	1	1	5	5	1	1	1	1	1	1	1
1942786	2	4	2	4	1	4	4	4	2	3	3	2	2	2	2	2	3	5	5	5	5	5	5	5	5	5	4	1	1	1	1	1	1	1	1	5	1	1	1	1	1	1	1	1	1	2	1	1	1
1945710	2	13	1	6	1	4	4	3	1	3	3	1	1	1	3	2	5	5	5	5	5	5	4	5	5	5	5	2	1	1	1	1	1	1	1	3	1	1	1	1	1	1	1	1	1	1	1	2	1
1947968	3	12	1	3	1	4	4	3	3	3	3	3	3	3	3	3	5	5	5	5	5	5	5	5	5	5	2	3	1	1	1	1	1	1	1	1	1	1	1	1	1	1	1	1	1	1	1	1	1
1951955	3	12	1	5	1	4	5	5	3	4	3	3	3	3	3	3	5	5	5	5	5	5	5	5	5	5	5	1	1	1	1	1	1	1	1	1	1	1	1	1	1	1	1	1	1	1	1	1	1
1953141	5	5	2	7	2	4	4	4	2	4	3	2	2	4	4	5	5	5	5	5	5	5	5	5	5	5	2	1	1	1	1	1	1	1	1	1	1	1	1	1	1	1	1	1	1	1	1	1	1
1958443	2	13	2	7	1	4	4	4	1	3	3	2	1	1	4	4	5	5	5	5	4	5	1	5	3	5	5	1	1	1	1	1	1	1	1	3	1	1	1	1	1	1	1	1	1	1	1	1	1
1962571	3	2	1	5	1	4	5	3	1	3	1	1	1	1	1	2	5	5	5	5	5	5	5	5	5	5	5	1	1	1	1	1	1	1	1	5	1	1	1	1	1	1	1	1	1	1	1	1	4
1963565	1	2	2	6	1	4	1	1	1	1	1	1	1	1	1	1	5	5	5	5	5	5	5	5	5	5	4	1	1	1	1	1	1	1	1	5	1	1	1	1	1	1	1	1	1	1	1	1	1
1968806	4	12	1	3	1	4	4	3	1	4	3	1	1	1	1	2	5	5	5	5	5	5	5	5	5	5	4	1	1	1	1	1	1	1	1	1	1	1	1	1	1	1	1	1	1	1	1	1	1
1976285	3	7	2	6	1	4	4	4	3	3	4	2	1	2	4	4	5	5	5	5	4	5	5	5	5	5	5	1	1	1	1	1	1	1	1	3	1	2	2	2	1	1	1	1	1	4	1	1	1
1976964	2	7	1	6	1	4	3	3	3	3	3	3	3	3	3	3	5	5	5	5	5	5	5	5	5	5	1	1	1	1	1	1	1	1	1	3	5	2	2	2	2	2	1	2	2	2	2	1	2
1983740	2	2	1	7	1	4	5	5	1	4	1	2	1	1	1	1	5	5	5	5	5	5	5	5	5	5	5	1	1	1	1	1	1	1	1	3	1	1	1	1	1	1	1	1	1	1	1	1	1
1997473	4	8	1	5	1	4	5	5	4	5	4	2	1	2	2	2	3	5	4	5	5	5	5	5	5	5	1	1	1	1	1	1	1	1	1	5	1	1	1	1	1	1	1	1	1	1	1	1	1
2002896	1	5	5	2	1	4	1	1	1	1	1	1	1	1	1	1	5	5	5	5	5	5	5	5	5	5	2	2	1	1	1	1	1	1	1	2	1	1	1	1	1	1	1	1	1	1	1	1	1
2013621	4	8	1	5	1	4	5	5	3	5	5	3	3	1	1	3	3	4	3	3	4	4	4	4	4	4	5	1	1	1	1	1	1	1	1	1	1	1	1	1	1	1	1	1	1	1	1	1	1
2016788	2	12	1	6	1	4	1	1	1	1	1	1	1	1	1	1	5	5	5	5	5	5	5	5	5	5	1	1	1	1	1	1	1	1	1	2	1	1	1	1	1	1	1	1	1	1	1	1	1
2022565	1	5	2	6	1	4	5	5	1	1	5	5	5	5	1	5	5	1	1	1	1	1	1	1	1	5	5	2	1	1	1	1	1	1	1	3	1	1	1	1	1	3	1	1	1	3	3	2	1
2022603	3	5	2	6	1	4	4	4	1	3	3	1	1	1	1	1	5	5	5	5	5	5	5	5	5	5	2	1	1	1	1	1	1	1	1	1	1	1	1	1	1	1	1	1	1	1	1	1	1
2031538	2	5	1	4	1	4	4	4	2	4	3	2	2	1	1	2	5	5	5	5	5	5	5	5	5	5	4	1	1	1	1	1	1	1	1	3	1	1	1	1	1	1	1	1	1	1	1	2	1
2031789	1	5	2	7	1	4	2	2	1	1	1	1	1	1	1	1	5	5	5	5	5	5	5	5	5	5	4	1	1	1	1	1	1	1	1	1	1	1	1	1	1	1	1	1	1	1	1	1	1
2033140	1	13	2	6	1	4	5	4	2	4	2	2	2	1	1	1	4	5	4	4	5	5	3	4	4	5	5	4	5	5	5	5	5	5	5	5	1	1	1	1	1	1	1	1	1	3	1	1	1
2034020	4	5	1	7	1	4	4	3	2	3	3	2	2	2	2	2	5	5	5	5	5	5	5	5	5	5	4	1	1	1	1	1	1	1	1	1	1	1	1	1	1	1	1	1	1	1	1	1	1
2034953	3	7	2	9	1	4	5	5	5	5	5	4	4	5	5	5	3	3	2	3	3	1	3	3	3	3	1	2	1	1	1	1	1	1	1	1	1	1	1	1	1	1	1	1	1	1	1	1	1
2046077	2	12	1	5	1	4	5	5	3	5	4	3	3	3	3	3	4	5	5	4	5	5	5	5	5	5	1	1	1	1	1	1	1	1	1	1	1	1	1	1	1	1	1	1	1	1	1	1	1
2046757	1	7	5	6	1	4	5	5	3	4	4	3	3	5	5	4	4	5	4	4	4	4	4	4	4	4	5	1	1	1	1	1	1	1	1	1	1	1	1	1	1	1	1	1	1	1	1	1	1
2046888	1	13	3	6	1	4	5	4	2	4	3	2	2	4	2	3	5	5	5	5	4	5	5	5	5	5	1	2	1	1	1	1	1	1	1	1	1	1	1	1	1	1	1	1	1	1	1	1	1
2048699	5	2	1	6	1	4	2	1	1	4	1	1	1	1	1	5	5	5	5	5	5	5	5	5	5	5	2	1	1	1	1	1	1	1	1	3	2	1	1	1	5	1	1	1	2	2	1	1	1
2051601	3	3	1	4	1	4	4	4	4	4	4	4	4	4	4	4	3	3	3	3	3	5	5	5	5	5	1	1	1	1	1	1	1	1	1	1	1	1	1	1	1	1	1	1	1	1	1	1	1
2052555	2	4	5	1	1	4	4	4	2	4	3	2	2	3	3	3	3	2	1	1	1	1	1	1	1	1	2	5	1	1	1	1	1	1	1	3	3	2	2	1	2	1	1	1	3	5	1	3	3
2052680	1	5	2	6	1	4	4	3	1	2	3	2	2	2	1	3	3	2	2	1	3	3	3	3	2	3	4	1	1	1	1	1	1	1	1	1	1	1	1	1	1	1	1	1	1	1	1	1	1
2052693	2	12	1	3	1	4	5	5	3	4	4	3	3	3	3	3	4	4	4	4	4	5	5	5	5	5	1	1	1	1	1	1	1	1	1	5	1	2	2	1	1	1	1	1	1	1	2	1	1
2058302	6	7	1	6	1	4	3	2	1	2	1	1	1	1	1	3	5	5	5	5	5	5	5	5	5	5	2	2	1	1	1	1	1	1	1	1	1	1	1	1	1	1	1	1	1	1	1	1	1
2061847	1	5	2	6	1	4	5	4	4	3	4	3	4	5	4	3	2	3	3	4	2	1	2	3	5	4	4	4	1	1	1	1	1	1	1	2	5	5	5	5	5	5	3	2	2	1	1	2	2
2066689	1	8	2	3	1	4	4	3	2	2	2	2	2	3	2	3	4	5	4	5	4	5	4	5	5	5	4	1	1	1	1	1	1	1	1	1	1	1	1	1	1	1	1	1	1	1	1	1	1
2070685	3	12	1	8	1	4	4	4	3	3	4	3	3	2	3	3	4	5	5	5	5	5	5	5	5	5	5	1	1	1	1	1	1	1	1	1	1	1	1	1	1	1	1	1	1	1	1	1	1
2072155	3	11	1	7	1	4	5	4	1	3	4	1	1	1	1	1	5	5	5	5	5	5	5	5	5	5	5	1	1	1	1	1	1	1	1	1	1	1	1	1	1	1	1	1	1	1	1	1	1
2076096	2	12	1	4	1	4	5	5	3	4	4	2	2	2	2	4	5	5	5	5	5	5	5	5	5	5	2	5	1	1	1	1	1	1	1	1	1	1	1	1	1	1	1	1	1	1	1	1	1
2083608	2	11	1	3	1	4	4	4	1	2	2	1	1	1	1	1	5	5	5	5	5	5	5	5	5	5	5	1	1	1	1	1	1	1	1	1	1	1	1	1	1	1	1	1	1	1	1	1	1
2085910	2	13	1	3	1	4	5	5	3	3	3	2	3	3	3	3	3	5	4	4	3	4	3	5	5	5	5	1	1	1	1	1	1	1	1	3	1	1	1	1	1	1	1	1	1	1	1	1	1
2090160	1	5	2	6	1	4	2	4	2	2	2	2	2	3	2	3	5	5	5	4	4	2	2	2	2	2	4	1	1	1	1	1	1	1	1	1	1	1	1	1	1	1	1	1	1	1	1	1	1
2102797	3	4	1	6	1	4	2	3	1	1	2	1	1	1	1	2	5	5	5	5	5	5	5	5	5	5	5	1	1	1	1	1	1	1	1	3	1	1	1	1	1	1	1	1	1	1	1	1	1
2103133	4	12	1	3	1	4	4	4	2	3	4	1	1	1	1	1	5	5	5	3	4	2	2	1	1	1	3	1	1	1	1	1	1	1	1	1	1	1	1	1	1	1	1	1	1	1	1	1	1
2103290	2	11	1	6	1	4	3	3	3	3	3	3	3	3	3	4	5	5	5	5	5	5	5	5	5	5	5	1	1	1	1	1	1	1	1	3	1	1	1	1	1	1	1	1	1	1	1	1	1
2104174	4	5	1	6	1	4	5	4	3	5	4	3	3	3	3	3	4	4	4	3	3	5	4	4	5	3	4	1	1	1	1	1	1	1	1	5	1	1	1	1	1	1	1	1	1	1	1	1	5
2110616	4	5	1	2	1	4	4	4	5	4	3	3	4	2	3	4	3	3	3	4	4	3	4	2	3	3	4	3	1	1	1	1	1	1	1	1	1	1	1	1	1	1	1	1	1	1	1	1	1
2120489	2	1	1	6	1	4	3	3	2	3	3	2	2	3	3	3	5	5	5	5	5	5	5	5	5	5	2	1	1	1	1	1	1	1	1	3	1	1	1	1	1	5	1	1	1	1	1	1	1
2122741	2	13	1	3	1	4	1	3	1	1	1	1	1	1	1	2	5	4	4	4	3	3	3	3	3	3	4	1	1	1	1	1	1	1	1	3	1	1	1	1	5	1	1	1	1	1	1	1	1
[truncated: 23,892 more rows]
[truncated: 43 more columns]
